# Supplementary material for: Tritordeum Bulel and Aucan: Promising Cultivars to Improve Health
Source: Preprints.org preprint supplement (doi:10.20944/preprints202312.0652.v1), 2023-12-11
Supplement: Supplementary file 1 [file supplementary]

## Sheet: Foglio1
LFQ intensity AUCAN_r1	LFQ intensity AUCAN_r2	LFQ intensity AUCAN_r3	LFQ intensity BULEL_r1	LFQ intensity BULEL_r2	LFQ intensity BULEL_r3	LFQ intensity PROVENZAL_r1	LFQ intensity PROVENZAL_r2	LFQ intensity PROVENZAL_r3	Peptides	Razor + unique peptides	Unique peptides	Sequence coverage [%]	Unique + razor sequence coverage [%]	Unique sequence coverage [%]	Mol. weight [kDa]	Q-value	Score	Intensity	iBAQ peptides	MS/MS count	Protein IDs	Majority protein IDs	id
23.6819400787354	24.2564601898193	23.9814033508301	23.8149814605713	23.2377071380615	22.9086208343506	23.5172348022461	22.1916599273682	23.0001621246338	2	2	2	2.2	2.2	2.2	117.58	0	11.716	17540000	85	2	A0A446MZB8;A0A446MZB3;A0A446MZB6;A0A446MZE1;A0A446MZA6;A0A446MZB5;A0A446MZE8;A0A446MZA7;A0A446P9A8;A0A3B6E955;I0JTW5;D8L9U6;A0A446P9W8;A0A3B6E987;M7Z7S1;A0A446PAH9;A0A3B6GJX5;A0A182BG22;A0A446P996;A0A446P974;A0A446P9V5;A0A446P9A6;A0A446MZE0;A0A446P963	A0A446MZB8;A0A446MZB3;A0A446MZB6;A0A446MZE1;A0A446MZA6;A0A446MZB5;A0A446MZE8;A0A446MZA7;A0A446P9A8;A0A3B6E955;I0JTW5;D8L9U6;A0A446P9W8;A0A3B6E987;M7Z7S1;A0A446PAH9;A0A3B6GJX5;A0A182BG22;A0A446P996;A0A446P974;A0A446P9V5;A0A446P9A6;A0A446MZE0;A0A446P963	489
23.5969142913818	23.6839847564697	23.8050842285156	23.2159824371338	24.4504356384277	23.1273326873779	22.5011425018311	24.0236778259277	23.9829711914063	5	4	2	6.9	5.5	3	117.72	0	24.445	57489000	82	7	A0A287Q4H7;A0A446SK70;F2DQ38;A0A3B6IZS6;A0A446SK39;A0A446TR74;A0A3B6KS94;A0A3B6U6K4;A0A287Q4U2;A0A446TR73;M7YVT6;A0A446TR59;A0A446SK91;A0A446SKA4;A0A287Q557;A0A446V9C8;A0A287Q4G4;A0A446U0T5;A0A446U0S6;A0A446SVM9;A0A446U116;A0A446SVK5;A0A446SVN2;A0A446SVN9	A0A287Q4H7;A0A446SK70;F2DQ38;A0A3B6IZS6;A0A446SK39;A0A446TR74;A0A3B6KS94;A0A3B6U6K4;A0A287Q4U2;A0A446TR73;M7YVT6;A0A446TR59;A0A446SK91;A0A446SKA4	141
25.9974002838135	23.952392578125	22.5801658630371	23.4946403503418	26.7905445098877	23.6218490600586	26.2578010559082	26.3487281799316	26.6087951660156	6	6	4	5.1	5.1	3.7	139.23	0	36.043	746330000	81	29	A0A446VIU5;M7ZEL7;A0A3B6NSG2;A0A446VIS6;Q852R3;F2CPX8;A0A287UF89;A0A3B6QI62;A0A287UF86;A0A287UF97;A0A3B6PLT1;A0A446VIM4;A0A287UFA2;A0A446VIV2;A0A287UF79;A0A446VIR9;A0A446WG94;A0A446VIR3;A0A3B6QFX2;A0A446WGF2;A0A446WGA7;A0A446VIU1;A0A3B6QI57;A0A3B6QG55;A0A3B6NRW7;A0A446VIV5;A0A446WGG6;A0A3B6PPY5;A0A446WGA8;A9XGE7;A0A446VIR1;A0A446WGK1;A0A446VIN6;A9XGE0;Q7XYC1;A0A446WGL2;A0A446VIQ4;A0A287UF81;Q9SME…	A0A446VIU5;M7ZEL7;A0A3B6NSG2;A0A446VIS6;Q852R3;F2CPX8;A0A287UF89;A0A3B6QI62;A0A287UF86;A0A287UF97;A0A3B6PLT1	525
25.6178722381592	24.9443607330322	24.7401599884033	25.1828708648682	24.9167957305908	25.1551837921143	22.2487964630127	22.9781875610352	24.8452816009521	15	15	2	21.7	21.7	1.4	110.16	0	90.631	461070000	77	35	F2DPX3;A0A446T1Y9;F2CR56;A0A3B6KHJ0;A0A446T220;A0A446T1Z1;O82072;M7ZKL3;A0A287RAA9;A0A287RAF3;A0A446T1Z4;A0A287RA54;A0A446U7E9;A0A446U7E8;A0A446T203;A0A446T1Z5;A0A446T1Y6;A0A287RAB9;A0A446T206;A0A287RAC8;A0A446U7E5;A0A446T1Z2;M0UFA7;A0A287RAE8;A0A287RAJ9;O48623;T1TD22;Q5D5T4;Q5MX87;Q5MX86;Q0H405;Q5MX89;Q5MX88;Q5MX90;A0A287RAD5;A0A067YI71;Q6V759;T1TDM2;A0A067YI72;T1TD59;A0A446NPU0;A0A077S3P8;M0YAU…	F2DPX3;A0A446T1Y9;F2CR56;A0A3B6KHJ0;A0A446T220;A0A446T1Z1;O82072;M7ZKL3;A0A287RAA9;A0A287RAF3;A0A446T1Z4;A0A287RA54;A0A446U7E9;A0A446U7E8;A0A446T203;A0A446T1Z5;A0A446T1Y6;A0A287RAB9;A0A446T206	361
22.9500045776367	23.1512432098389	24.184513092041	23.5697631835938	23.3918685913086	23.5959720611572	24.1971378326416	22.9306392669678	23.1182670593262	14	1	1	21.7	1.4	1.4	110.18	0	6.5317	90625000	77	5	A0A3B6MR18;A0A3B6LL76;A0A446U7G2;A0A446U7F3;A0A446U7J6;A0A446U7G7;A0A446U7G3;A0A446U7I6	A0A3B6MR18;A0A3B6LL76;A0A446U7G2;A0A446U7F3;A0A446U7J6;A0A446U7G7;A0A446U7G3	382
24.0476856231689	23.1449394226074	24.1054363250732	23.6809883117676	22.9680786132813	23.4180183410645	22.775505065918	23.1621723175049	22.4709320068359	3	3	2	3.4	3.4	2.4	130.09	0	18.254	24520000	74	5	M7Z3I6;A0A446LVB9;A0A1D5UZY9;F2DGF3;A0A3B6ASP6;A0A446KKC5;A0A287H480;A0A446LVD4;A0A446LVC2;A0A446KK62;A0A446KK58;A0A446KK67;A0A446KK56;A0A287H425;A0A446LVF3;A0A3B6C1V4;A0A3B6DDP3;A0A287H482;A0A446L2N7;A0A446MBV2;A0A287H424;A0A446L2K9;A0A446L2K3;A0A446MBY9;A0A446MBQ9;A0A446MBW8;A0A446L2U4;A0A446L2M5;A0A446MBX4;A0A446MBU3;A0A446L2P3;A0A446MBM5;A0A446L2K8;A0A446MBQ8	M7Z3I6;A0A446LVB9;A0A1D5UZY9;F2DGF3;A0A3B6ASP6;A0A446KKC5;A0A287H480;A0A446LVD4;A0A446LVC2;A0A446KK62;A0A446KK58;A0A446KK67;A0A446KK56;A0A287H425;A0A446LVF3;A0A3B6C1V4	71
24.1520500183105	23.0981712341309	22.7306346893311	23.7069549560547	22.8845024108887	23.5562477111816	22.4537372589111	23.0281257629395	23.7499332427979	6	5	5	7.7	6.1	6.1	102.22	0	30.857	99458000	70	10	A0A287XXN6;A0A3B6RS92;A0A446XYP1;A0A446XYH4;A0A446XY35;A0A446XY77;A0A446XYN7;A0A446XY41;A0A287XY19;M7YZ42;A0A446XYR1;A0A446XYL1;F2D9M2;P36183;A0A287XXN2;A0A446XY96;A0A287XXZ5;A0A287XXT6;A0A3B6TYS2;A0A287XY34;A0A446XYJ0;A0A446XYQ9;A0A446XYJ3;A0A446XYU2;A0A446XYS2;A0A446XYC2;A0A287XY14;A0A446XYD3;A0A287XXP7;A0A287XXZ6;A0A287XY24;A0A287XXM7;A0A3B6SPF0;F2D3Z5;A0A287XXX8;A0A3B6ST62;A0A3B6RPC7;A0A446XY…	A0A287XXN6;A0A3B6RS92;A0A446XYP1;A0A446XYH4;A0A446XY35;A0A446XY77;A0A446XYN7;A0A446XY41;A0A287XY19;M7YZ42;A0A446XYR1;A0A446XYL1;F2D9M2;P36183;A0A287XXN2;A0A446XY96;A0A287XXZ5;A0A287XXT6;A0A3B6TYS2;A0A287XY34;A0A446XYJ0;A0A446XYQ9;A0A446XYJ3;A0A446XYU2;A0A446XYS2;A0A446XYC2;A0A287XY14;A0A446XYD3;A0A287XXP7;A0A287XXZ6;A0A287XY24;A0A287XXM7;A0A3B6SPF0;F2D3Z5;A0A287XXX8;A0A3B6ST62;A0A3B6RPC7;A0A446XY…	184
23.2753219604492	22.6686172485352	23.6676464080811	22.8183650970459	23.0209407806396	22.1796932220459	23.3759593963623	22.8946437835693	23.5690383911133	20	1	1	27.3	1.6	1.6	101.05	0	6.716	0	68	1	A0A3B5Y4C0;Q334I1;A0A446J8K5;Q9ZT12;Q9SPH4;A0A3B6GV19;A0A6M5K847;A0A3B6EIZ2;A0A287LKE0;A0A446NN16;Q334H8;A0A077RSI4;F2E8B0;A0A446PYD8;M0WFE2;F2DAD6;Q334H9;A0A287LKB9;A0A446NMT9;A0A446PY00;A0A287LKB8;A0A446NN27;A0A446J8N1;T1M537;A0A287LKB3;A0A287GAV7;A0A287LKE5;A0A446NMX9;T1NG28;A0A446PYC0;A0A446PY96;A0A446NMU6;A0A0U3U5J3;A0A0U3SQX6;A0A0U3IYU8;H6UG39;A0A0U3TEZ4;A0A0U3UIF4;A0A287LKC0;A0A287LKC4;A0A…	A0A3B5Y4C0;Q334I1;A0A446J8K5;Q9ZT12;Q9SPH4;A0A3B6GV19;A0A6M5K847;A0A3B6EIZ2;A0A287LKE0;A0A446NN16;Q334H8;A0A077RSI4;F2E8B0;A0A446PYD8;M0WFE2;F2DAD6;Q334H9;A0A287LKB9;A0A446NMT9;A0A446PY00;A0A287LKB8;A0A446NN27;A0A446J8N1;T1M537	211
25.609302520752	25.411865234375	25.5688591003418	25.1576538085938	25.3871250152588	25.154411315918	25.1207599639893	24.753381729126	25.4288940429688	22	22	1	32.7	32.7	3.6	101.06	0	132.48	1523200000	68	73	Q334I0;A0A446K7D6;A0A3B5Z1T0;Q9XEI1;A0A3B5ZYT4;A0A287GAV5;A0A287GAV2	Q334I0;A0A446K7D6;A0A3B5Z1T0;Q9XEI1;A0A3B5ZYT4;A0A287GAV5	235
23.5835285186768	23.7619705200195	22.8716049194336	23.0805759429932	23.464729309082	23.196475982666	23.237476348877	22.8320903778076	23.7965831756592	6	3	3	9.6	5.3	5.3	73.483	0	18.876	75830000	66	3	A0A287GI21;A0A287GI25;A0A287GI29;F2EKY2;A9Q2Q5	A0A287GI21;A0A287GI25;A0A287GI29;F2EKY2;A9Q2Q5	109
23.3769836425781	23.0851039886475	23.5891304016113	23.262809753418	23.5165786743164	24.6872329711914	22.7561016082764	22.4527587890625	23.5936012268066	11	6	5	22.9	13	10.9	74.275	0	35.821	174770000	66	4	A0A3B5Z3G6	A0A3B5Z3G6	236
26.6549911499023	26.4463844299316	26.7555732727051	26.6532154083252	26.8210430145264	26.4470157623291	27.2197418212891	27.2994632720947	27.2095527648926	16	16	8	34	34	16.6	72.717	0	95.846	2584200000	66	91	A0A446JD98;A0A446JD62;A0A3B5Y5E3;M7ZTN2	A0A446JD98;A0A446JD62;A0A3B5Y5E3	471
23.3328132629395	22.4917087554932	23.077465057373	22.3937015533447	22.4435997009277	23.6353740692139	25.0990467071533	24.5909786224365	22.5296859741211	9	9	9	14.1	14.1	14.1	98.395	0	53.765	303090000	63	15	A0A446QM09;A0A3B6IW79;A0A446SCV4;F2EL23;A0A446SCW5;A0A287PLI5;A0A3B6JLV1;A0A446SCV0;A0A446SCL4;A0A287PL95;A0A3B6IUF1;A0A3B6JNP8;M7ZG23;A0A3B6HMU5;A0A446QLP1;M7ZSC0;A0A446QLP9;A0A446SCV7;A0A3B6JKX4;A0A446QLQ9;A0A446SCV8;A0A446QMM5;A0A287PL99;A0A446SCL5;A0A446QLT3;A0A287PL69;A0A446QLZ7;A0A446QLQ1;A0A3B6HS31;A0A446SCT2;F2E3Y2;A0A446SCX0;A0A446SCT0;A0A446QLY6;A0A287PMC7;A0A3B6JME2;A0A287PLA3;A0A446SC…	A0A446QM09;A0A3B6IW79;A0A446SCV4;F2EL23;A0A446SCW5;A0A287PLI5;A0A3B6JLV1;A0A446SCV0;A0A446SCL4;A0A287PL95;A0A3B6IUF1;A0A3B6JNP8;M7ZG23;A0A3B6HMU5;A0A446QLP1;M7ZSC0;A0A446QLP9;A0A446SCV7;A0A3B6JKX4;A0A446QLQ9;A0A446SCV8;A0A446QMM5;A0A287PL99;A0A446SCL5;A0A446QLT3;A0A287PL69;A0A446QLZ7;A0A446QLQ1;A0A3B6HS31;A0A446SCT2;F2E3Y2;A0A446SCX0;A0A446SCT0;A0A446QLY6;A0A287PMC7;A0A3B6JME2;A0A287PLA3;A0A446SC…	138
23.3047561645508	23.4106292724609	23.0173740386963	23.6120719909668	22.0463256835938	22.5652904510498	22.0530891418457	23.9506988525391	22.9479751586914	3	2	2	4.2	2.9	2.9	111.46	0	12.134	7730000	62	2	A0A446L2J7;A0A2X0TM85;A0A3B6AZG4;A0A3B6C6P4;A0A446L2K5;A0A446L2S9;A0A446L2M8;M7Z527;A0A3B6C909;A0A446MBX7;A0A287ICC8;A0A446MBL4;F2CRU4;A0A287IC75;A0A287ICA1;A0A446MBT2;A0A446MBQ1;A0A446MBP7;A0A446L2L7;A0A446MBS5;A0A446MBU2;A0A446L2I4;F2D2Z5;A0A446MBR4;A0A446MBL9;A0A446MBM7;A0A287IC76	A0A446L2J7;A0A2X0TM85;A0A3B6AZG4;A0A3B6C6P4;A0A446L2K5;A0A446L2S9;A0A446L2M8;M7Z527;A0A3B6C909;A0A446MBX7;A0A287ICC8;A0A446MBL4;F2CRU4;A0A287IC75;A0A287ICA1;A0A446MBT2;A0A446MBQ1;A0A446MBP7;A0A446L2L7;A0A446MBS5;A0A446MBU2;A0A446L2I4	189
25.8301887512207	25.7844161987305	26.0787334442139	25.7517986297607	25.6650848388672	25.7759799957275	25.7068824768066	26.6090774536133	26.017822265625	16	16	16	17.7	17.7	17.7	91.92	0	96.241	1477100000	59	51	A0A446YTY0;A0A3B6N1J5;A0A446RFI3;A0A446UV49;A0A446XUJ8;A0A3B6LX08;A0A446RFV6;A0A446UV23;A0A3B6SM60;A0A3B6LXC1;A0A446RFW7;A0A3B6LX58;A0A287SV62;A0A446XUA4;A0A3B6RQD1;A0A287XP46;A0A446RFK7;A0A446UV34;A0A287SV31;A0A3B6TWP7;A0A446XUB9;A0A3B6N2V5;A0A446YTT8;M7Z1I6;A0A3B6I3X0;M8A472;A0A446RFK9;A0A446YTW9;A0A446UV52;A0A3B6I318;A0A446UV11;A0A446XUA1;A0A446UV02;A0A446RFF3;A0A446XUK8;A0A446XUN6;A0A446XUE0;…	A0A446YTY0;A0A3B6N1J5;A0A446RFI3;A0A446UV49;A0A446XUJ8;A0A3B6LX08;A0A446RFV6;A0A446UV23;A0A3B6SM60;A0A3B6LXC1;A0A446RFW7;A0A3B6LX58;A0A287SV62;A0A446XUA4;A0A3B6RQD1;A0A287XP46;A0A446RFK7;A0A446UV34;A0A287SV31;A0A3B6TWP7;A0A446XUB9;A0A3B6N2V5;A0A446YTT8;M7Z1I6;A0A3B6I3X0;M8A472;A0A446RFK9;A0A446YTW9;A0A446UV52;A0A3B6I318;A0A446UV11;A0A446XUA1;A0A446UV02;A0A446RFF3;A0A446XUK8;A0A446XUN6;A0A446XUE0;…	157
25.3795776367188	25.7203845977783	25.581787109375	23.6668643951416	25.4003467559814	25.0481414794922	22.856559753418	21.9591026306152	22.2053623199463	12	11	1	17.3	16	1.3	94.611	0	65.439	659950000	59	20	A0A446Y5L6;M0UKI5;A0A446Y5M4;A0A446Y5L9;A0A446Y5L1;A0A446Y5M7;A0A3B6TMN0;A0A3B6SD29;A0A446Y5L4;A0A3B6REV7;A0A446Y5L8;F2DXJ9;A0A3B6TB41;A0A446Y5L2;A0A287VYW6;A0A3B6SER7;A0A446Y5L3;A0A446Y5M2;A0A446Y5N4;A0A446Y5M1;A0A446Y5M8;P31922;A0A446Y5L0;C5JA75;O82073;A0A446Y5M0;A0A287VYP3;A0A446Y5P1;A0A446X5Q7;A0A446Y5P5;A0A446X5K4;A0A446X5W4;A0A446Y5P2;A0A3B6S9J7;A0A446X5M7;A0A446Y5P0;A0A446Y5P6;A0A446Y5P4;A…	A0A446Y5L6;M0UKI5;A0A446Y5M4;A0A446Y5L9;A0A446Y5L1;A0A446Y5M7;A0A3B6TMN0;A0A3B6SD29;A0A446Y5L4;A0A3B6REV7;A0A446Y5L8;F2DXJ9;A0A3B6TB41;A0A446Y5L2;A0A287VYW6;A0A3B6SER7;A0A446Y5L3;A0A446Y5M2;A0A446Y5N4;A0A446Y5M1;A0A446Y5M8;P31922;A0A446Y5L0;C5JA75;O82073;A0A446Y5M0;A0A287VYP3;A0A446Y5P1;A0A446X5Q7;A0A446Y5P5;A0A446X5K4;A0A446X5W4;A0A446Y5P2;A0A3B6S9J7;A0A446X5M7;A0A446Y5P0;A0A446Y5P6;A0A446Y5P4;A…	175
23.3595943450928	23.0954818725586	23.8896102905273	22.1085300445557	23.2711696624756	23.6269855499268	23.2002906799316	23.3280620574951	23.2635726928711	2	2	2	4.4	4.4	4.4	83.905	0	12.229	10206000	59	2	A0A446N6N0;A0A446N762;A0A446N7D5;M7Z099;A0A3B6EDY7;A0A446N6P0;A0A3B6TRK1;A0A287KCS2;A0A446PGA8;A0A3B6GNX8;W5CPG2;A0A446PIX6;A0A446YVL1;A0A3B6SJE5;A0A3B6FIX9;A0A446PGE0;A0A3B6LHE8;A0A287KCT0;A0A446YVG7;A0A446YVG8;A0A287KD13;A0A446YVN0;A0A446PH18;A0A287KCS9;A0A446YVH8;A0A446PGB0;A0A287KCS7;M0ZBY9;M0ZBZ0;A0A446PHE9;A0A446PGK2;A0A446YVU3;A0A287KCT4;A0A287KCZ7;A0A446N6S0;A0A287KCT6;A0A287KCU0	A0A446N6N0;A0A446N762;A0A446N7D5;M7Z099;A0A3B6EDY7;A0A446N6P0;A0A3B6TRK1;A0A287KCS2;A0A446PGA8;A0A3B6GNX8;W5CPG2;A0A446PIX6;A0A446YVL1;A0A3B6SJE5;A0A3B6FIX9;A0A446PGE0;A0A3B6LHE8;A0A287KCT0;A0A446YVG7;A0A446YVG8;A0A287KD13;A0A446YVN0;A0A446PH18;A0A287KCS9;A0A446YVH8;A0A446PGB0;A0A287KCS7;M0ZBY9;M0ZBZ0;A0A446PHE9;A0A446PGK2;A0A446YVU3;A0A287KCT4;A0A287KCZ7;A0A446N6S0;A0A287KCT6;A0A287KCU0	281
24.5636024475098	22.1267986297607	24.6588363647461	23.81911277771	23.925968170166	22.7941017150879	21.9185028076172	22.9234466552734	22.6228065490723	5	5	5	9.4	9.4	9.4	96.227	0	29.212	101520000	59	8	A0A446J2D7;A0A446J2F2;A0A446J2E8;A0A446J2K5;A0A446J2E4;A0A3B5Y1G6;A0A446J2L7;A0A446J2G9;A0A446J2D2;A0A3B5ZXI9;A0A446J2F0;A0A3B5Y1S3;M7ZXX2;A0A446J2G3;A0A446J2G0;A0A3B5ZW99;A0A3B5Y1F9;A0A3B5YYS5;A0A3B5YYW4;A0A446K173;A0A446K192;A0A3B5Z063;A0A446K1A2;A0A446K188;A0A446K169;A0A446K182;A0A446K181;A0A446K156;A0A446K191;A0A446K180;A0A446K159;A0A287FVF5;A0A287FVG4;F2DCE3;A0A287FVF9;A0A287FVF6;A0A287FVG0;…	A0A446J2D7;A0A446J2F2;A0A446J2E8;A0A446J2K5;A0A446J2E4;A0A3B5Y1G6;A0A446J2L7;A0A446J2G9;A0A446J2D2;A0A3B5ZXI9;A0A446J2F0;A0A3B5Y1S3;M7ZXX2;A0A446J2G3;A0A446J2G0;A0A3B5ZW99;A0A3B5Y1F9;A0A3B5YYS5;A0A3B5YYW4;A0A446K173;A0A446K192;A0A3B5Z063;A0A446K1A2;A0A446K188;A0A446K169;A0A446K182;A0A446K181;A0A446K156;A0A446K191;A0A446K180;A0A446K159	470
22.4196643829346	22.4470100402832	23.8390369415283	23.7626457214355	22.9753684997559	23.922342300415	23.2935009002686	22.1536445617676	22.8878650665283	7	7	1	9.9	9.9	2.5	90.143	0	42.654	156550000	58	13	A0A446IQJ7;A0A446IQI6;A0A446IQK6;A0A3B5YUK3;A0A446JQ41;A0A446IQJ4;A0A3B5XWY7;A0A446IQI9;A0A446IQJ3;A0A446JQ23;A0A446JQ56;A0A446JQ21;A0A3B5YVJ5;A0A446JQ57;A0A446IQR5;A0A446JQ43;A0A446IQK0;A0A446IQK2;A0A3B5ZRE8;A0A3B5XXV7;A0A446JQ17;A0A446IQL2;M7ZQL9;A0A446JQ20;A0A3B5ZQY5;A0A446IQJ0;A0A3B5XWW9;A0A287EZQ9;A0A287EZP5;A0A3B5ZSP4;A0A3B5ZQY3;A0A446JQ48;A0A446JQ68;A0A446IQK4;A0A3B5XWM2;A0A446IQI5;A0A446J…	A0A446IQJ7;A0A446IQI6;A0A446IQK6;A0A3B5YUK3;A0A446JQ41;A0A446IQJ4;A0A3B5XWY7;A0A446IQI9;A0A446IQJ3;A0A446JQ23;A0A446JQ56;A0A446JQ21;A0A3B5YVJ5;A0A446JQ57;A0A446IQR5;A0A446JQ43;A0A446IQK0;A0A446IQK2;A0A3B5ZRE8;A0A3B5XXV7;A0A446JQ17;A0A446IQL2;M7ZQL9;A0A446JQ20;A0A3B5ZQY5;A0A446IQJ0;A0A3B5XWW9;A0A287EZQ9;A0A287EZP5;A0A3B5ZSP4;A0A3B5ZQY3;A0A446JQ48;A0A446JQ68;A0A446IQK4;A0A3B5XWM2;A0A446IQI5;A0A446J…	198
24.9668407440186	25.4973487854004	25.3423500061035	24.2578907012939	24.9824180603027	23.4527168273926	25.0388374328613	22.88938331604	22.7129154205322	10	10	10	18.6	18.6	18.6	88.404	0	59.317	553320000	58	28	A0A446VUY4;A0A446VUX7;A0A446VUX6;A0A446VUY0;A0A446VUX0;A0A446WT08;A0A446VV10;A0A3B6NVD9;A0A3B6QKY1;A0A446VUX5;A0A446WT03;A0A3B6PT84;A0A3B6QPD1;A0A446WT06;F2CS40;A0A287V748;A0A287V720;M7Y7L9;A0A287V7D1;A0A446VV15;A0A446WT31;A0A446VUZ9;A0A446WT09;A0A446VUW8;A0A287V704;A0A287V743;A0A287V701;A0A446VUX2;A0A446WT46;A0A446VV47;A0A446WT00;A0A446VUX1;A0A287V719;A0A446VV58;A0A3B6GS53;A0A446PNN7;A0A446NDA7;…	A0A446VUY4;A0A446VUX7;A0A446VUX6;A0A446VUY0;A0A446VUX0;A0A446WT08;A0A446VV10;A0A3B6NVD9;A0A3B6QKY1;A0A446VUX5;A0A446WT03;A0A3B6PT84;A0A3B6QPD1;A0A446WT06;F2CS40;A0A287V748;A0A287V720;M7Y7L9;A0A287V7D1;A0A446VV15;A0A446WT31;A0A446VUZ9;A0A446WT09	527
23.4203872680664	22.7106113433838	23.5678615570068	22.9473533630371	23.0595893859863	22.0656337738037	23.7353591918945	23.7343406677246	22.2492027282715	9	2	2	26.8	5.5	5.5	48.138	0	12.14	35646000	57	4	A0A3B6HPE1;M7ZS22	A0A3B6HPE1	304
24.2557315826416	24.660795211792	24.7340717315674	24.3800735473633	24.7875080108643	24.665843963623	24.4713478088379	24.8959217071533	25.1352787017822	16	8	6	26.3	11.9	10	83.668	0	49.237	499480000	56	34	A0A287RRB7;A0A446UDB5;A0A446T608;A0A446UDC0;A0A446T631;A0A446T614;A0A446UD69;A0A446UD92;A0A446UDC4;A0A446T642;A0A446UDA2;A0A446T638;A0A446UDB2;A0A446T625;A0A446UD82;A0A446T639;A0A446T633;A0A287RR43;F4Y5B8;F4Y5B7;Q7XJ80;F4Y595;F4Y5A9;Q0Q0I7;A0A446UDD5;A0A446T645;A0A446UD88;F2DX25;A0A446UD58;A0A287RRF4;A0A446T623;A0A446T648;A0A3B6KHN4;A0A446UD78;A0A446T655;A0A3B6KK83;A0A446T620;A0A446UD99;A0A446T64…	A0A287RRB7;A0A446UDB5;A0A446T608;A0A446UDC0;A0A446T631;A0A446T614;A0A446UD69;A0A446UD92;A0A446UDC4;A0A446T642;A0A446UDA2;A0A446T638;A0A446UDB2;A0A446T625;A0A446UD82;A0A446T639;A0A446T633;A0A287RR43;F4Y5B8;F4Y5B7;Q7XJ80;F4Y595;F4Y5A9;Q0Q0I7;A0A446UDD5;A0A446T645;A0A446UD88;F2DX25;A0A446UD58;A0A287RRF4;A0A446T623;A0A446T648;A0A3B6KHN4;A0A446UD78;A0A446T655;A0A3B6KK83;A0A446T620;A0A446UD99;A0A446T64…	150
22.9440898895264	23.2861576080322	23.3897342681885	23.0189380645752	22.7627258300781	23.0218925476074	22.6599559783936	23.7777614593506	23.7107238769531	4	4	4	6.7	6.7	6.7	95.95	0	23.894	94845000	56	9	A0A446J7M1;A0A446J7Q7;A0A3B5ZYY5;A0A446J7P4;M8AAE4;A0A3B5Y3Y4;A0A446K6L3;A0A3B5Z1F3;A0A446J7P7;A0A287GCH7;A0A287GCJ1;A0A287GCI3;A0A287GCL9;F2ELJ9;A0A287GCM4;A0A287GCH1;A0A287GCL8;E2GL16;A0A287GCK4;A0A287GCI9;A0A287GCI4;A0A446K6J9;A0A287GCL6;A0A287GCI7;A0A287GCH6;A0A287GCJ9;A0A287GCK3;A0A287GCK8;A0A287GCI1;A0A287GCJ7;A0A287GCM5;A0A287GCJ4;A0A287GCK5;A0A287GCJ5;A0A287GCH4;A0A287GPU1	A0A446J7M1;A0A446J7Q7;A0A3B5ZYY5;A0A446J7P4;M8AAE4;A0A3B5Y3Y4;A0A446K6L3;A0A3B5Z1F3;A0A446J7P7;A0A287GCH7;A0A287GCJ1;A0A287GCI3;A0A287GCL9;F2ELJ9;A0A287GCM4;A0A287GCH1;A0A287GCL8;E2GL16;A0A287GCK4;A0A287GCI9;A0A287GCI4;A0A446K6J9	209
26.1254196166992	26.3318500518799	26.3949451446533	26.288064956665	26.1809387207031	26.3987007141113	26.0958118438721	26.5124378204346	26.4220752716064	17	17	7	30.4	30.4	11.7	80.454	0	102.08	1483500000	54	63	F4Y593;A0A446YCG1;A0A2U8M475;A0A3B6SIR8;F4Y5B6;A0A446YCG8;A0A446XC52;A0A446YCH8;A0A446YCI2;F4Y5A8;A0A446YCH5;A0A3B6RHR0;F4Y592;F4Y5B5;M8AFK2;A0A446YCP0;A0A446XC62;A0A446YCG9;A0A446XC23;A0A446XC34;F2CU34;A0A446XC00;A0A446XC10;Q9ZRG0;A0A446YCN1;F4Y594;A0A287WF55;A0A287WFA2;A0A446YCF0;A0A446XC16;A0A446XC12;A0A446XC28;A0A446YCJ7;A0A446XC15;A0A446YCE6;A0A446YCG2;A0A446YCG0;A0A446YCH3;A0A446XC29;A0A446…	F4Y593;A0A446YCG1;A0A2U8M475;A0A3B6SIR8;F4Y5B6;A0A446YCG8;A0A446XC52;A0A446YCH8;A0A446YCI2;F4Y5A8;A0A446YCH5;A0A3B6RHR0;F4Y592;F4Y5B5;M8AFK2;A0A446YCP0;A0A446XC62;A0A446YCG9;A0A446XC23;A0A446XC34;F2CU34;A0A446XC00;A0A446XC10;Q9ZRG0;A0A446YCN1;F4Y594;A0A287WF55;A0A287WFA2;A0A446YCF0;A0A446XC16;A0A446XC12;A0A446XC28;A0A446YCJ7;A0A446XC15;A0A446YCE6;A0A446YCG2;A0A446YCG0;A0A446YCH3;A0A446XC29;A0A446…	186
22.7460556030273	23.818058013916	23.1659851074219	22.8239212036133	22.3886280059814	22.7561912536621	22.2033596038818	22.5837326049805	24.1919918060303	2	2	2	3.5	3.5	3.5	83.668	0	11.857	20314000	53	4	M7ZNK7;A0A3B6KHQ2;A0A287EA47;A0A287EA45;A0A3B6MQZ0;A0A446T2G1;A0A446U808;A0A3B6LLC8;A0A446U809;A0A446U800;A0A287QYS2;A0A3B6KIC4;A0A3B6LJS2;A0A446U7Z7;A0A3B6LLM1;A0A446T2E8;A0A446U7Z4;A0A446T2H2;A0A446U7Z0;A0A287P7R9;A0A287P881;A0A287P7T4;A0A287P7R4;A0A287EA30;A0A287QYP4;A0A287P8Z7;A0A287P7V0;A0A287P886;A0A287IM96;A0A287IME6;A0A287P7T9;A0A287P7Q9;A0A287P7U0	M7ZNK7;A0A3B6KHQ2;A0A287EA47;A0A287EA45;A0A3B6MQZ0;A0A446T2G1;A0A446U808;A0A3B6LLC8;A0A446U809;A0A446U800;A0A287QYS2;A0A3B6KIC4;A0A3B6LJS2;A0A446U7Z7;A0A3B6LLM1;A0A446T2E8;A0A446U7Z4;A0A446T2H2;A0A446U7Z0;A0A287P7R9;A0A287P881;A0A287P7T4;A0A287P7R4;A0A287EA30;A0A287QYP4;A0A287P8Z7;A0A287P7V0;A0A287P886;A0A287IM96;A0A287IME6;A0A287P7T9;A0A287P7Q9;A0A287P7U0	94
24.6797618865967	25.0020008087158	23.3997135162354	22.1006908416748	22.3600673675537	25.0295581817627	27.6164569854736	27.1942272186279	27.836353302002	11	11	4	30.5	30.5	7.9	45.654	0	66.342	2320800000	53	60	A0A3B6JLF7;A0A287PP23;A0A287PPZ0;F2DS64;A0A287PPW8	A0A3B6JLF7;A0A287PP23;A0A287PPZ0;F2DS64	355
26.3711910247803	26.2275123596191	26.2870254516602	26.1832695007324	26.1924228668213	26.233850479126	24.1458511352539	26.0426616668701	26.1220455169678	12	12	12	22.4	22.4	22.4	84.396	0	74.041	1227900000	53	32	A0A446TTR0;A0A446SN02;A0A446TTL4;A0A446SN45;A0A446SMZ7;A0A446SMX9;A0A446TTJ9;A0A446TTK4;M7ZHT1;A0A446SN04;Q6BCT3;A0A446SN54;A0A446TTM6;A0A446TTK1;A0A446TTL7;A0A446TTK9;A0A446SN77;A0A3B6LFK9;A0A3B6KAT3;A0A446TTS0;A0A446TTL5;A0A446TTN1;A0A446TTN0;A0A446SN68;Q4LB13;A0A446SN13;A0A3B6KBT8;A0A3B6MJZ2;A0A446TTL0;A0A446TTM4;A0A3B6K9Q1;A0A3B6LFR7;A0A446SN43;A0A446TTM1;A0A446SN06;A0A446TTK5;A0A446SN11;A0A3…	A0A446TTR0;A0A446SN02;A0A446TTL4;A0A446SN45;A0A446SMZ7;A0A446SMX9;A0A446TTJ9;A0A446TTK4;M7ZHT1;A0A446SN04;Q6BCT3;A0A446SN54;A0A446TTM6;A0A446TTK1;A0A446TTL7;A0A446TTK9;A0A446SN77;A0A3B6LFK9;A0A3B6KAT3;A0A446TTS0;A0A446TTL5;A0A446TTN1;A0A446TTN0;A0A446SN68;Q4LB13;A0A446SN13;A0A3B6KBT8;A0A3B6MJZ2;A0A446TTL0;A0A446TTM4;A0A3B6K9Q1;A0A3B6LFR7;A0A446SN43;A0A446TTM1;A0A446SN06;A0A446TTK5;A0A446SN11;A0A3…	512
23.93044090271	23.4639835357666	23.5373859405518	23.8633785247803	22.8858375549316	23.8147430419922	24.2597141265869	20.9872226715088	23.4674243927002	2	2	2	3.4	3.4	3.4	70.326	0	11.981	22042000	52	3	M7YE69;A0A3B6KLA0;A0A446TBG0;A0A3B6LRL0;A0A446SBM4;A0A446QN68;A0A3B6HQF6;F2DRC5;A0A3B6MVW8;A0A287S3D6;A0A446UIH3;A0A446SBJ7;M7ZLD2;A0A446QNZ0;A0A287S3C7;A0A287PHV8;A0A287PI60;A0A287PIX1;A0A446SBI3;M0XWV3;A0A446UIE4;A0A287S3D2;A0A287PHX7;A0A446SBC6;A0A446TBU9;A0A446UIH6;A0A287S3E1;A0A287S3D7;A0A287S3G3;A0A3B6ITU8;A0A287PI65;A0A446TBU8;A0A287S3N6;A0A287PIX6;A0A287S3F9;A0A446QN19;A0A446SBC0;A0A287S3…	M7YE69;A0A3B6KLA0;A0A446TBG0;A0A3B6LRL0;A0A446SBM4;A0A446QN68;A0A3B6HQF6;F2DRC5;A0A3B6MVW8;A0A287S3D6;A0A446UIH3;A0A446SBJ7;M7ZLD2;A0A446QNZ0;A0A287S3C7;A0A287PHV8;A0A287PI60;A0A287PIX1;A0A446SBI3;M0XWV3;A0A446UIE4;A0A287S3D2;A0A287PHX7;A0A446SBC6;A0A446TBU9;A0A446UIH6;A0A287S3E1;A0A287S3D7;A0A287S3G3;A0A3B6ITU8;A0A287PI65;A0A446TBU8;A0A287S3N6;A0A287PIX6;A0A287S3F9;A0A446QN19;A0A446SBC0;A0A287S3…	137
27.5291004180908	27.3149280548096	27.3937854766846	27.0571365356445	27.2931613922119	27.2020034790039	26.3272819519043	26.3055820465088	26.6097812652588	26	26	2	39	39	3.4	94.421	0	157.91	5465300000	52	155	A0A3B6AUT2;A0A446KRI6;M8A0T7;A0A446KRI7;A0A446KRS6;A0A446KRR2;A0A077HCY7;A0A446KRK3;A0A446KRH5;A0A446KRK2;A0A446KRJ2;A0A446M1M5;A0A446KRJ3;A0A446M1P7;A0A446KRR5;A0A446KRQ8;A0A287HKE0;A0A446KRP8;A0A446KRH4;A0A446M1W5;A0A446KRH8;A0A446M1S7;A0A446KRQ0;A0A446M1I0;A0A446KRQ1;A0A446M1L5;A0A446M1W8;A0A446RJX9;A0A446WY31;A0A446WY65;A0A446RK27;A0A446WY61;A0A3B6T820;M8A2R2;A0A446WY50;A0A446RJY1;A0A446WY59;…	A0A3B6AUT2;A0A446KRI6;M8A0T7;A0A446KRI7;A0A446KRS6;A0A446KRR2;A0A077HCY7;A0A446KRK3;A0A446KRH5;A0A446KRK2;A0A446KRJ2;A0A446M1M5;A0A446KRJ3;A0A446M1P7;A0A446KRR5;A0A446KRQ8;A0A287HKE0	254
23.9764270782471	23.1811370849609	23.1246948242188	22.7830963134766	23.0936698913574	24.0223617553711	23.5367813110352	23.901273727417	23.6491661071777	2	2	2	4.2	4.2	4.2	86.202	0	11.958	15458000	51	1	A0A446N9M1;A0A287KG74;A0A446N964;A0A446PIK5;A0A446N953;A0A446N9M6;A0A446PJ63;A0A446PIG7;A0A446PJ56;A0A446N8C5;A0A446N9L1;A0A446N8D2;A0A3B6GQ57;A0A3B6EEL3;A0A446N8D6;A0A287KG61;A0A446N8D8;M0X1N3;T1LXL0;W5D4Q6;A0A446PIH5;A0A446PHS1;A0A446PHW3;A0A446N8D4;A0A446PHS8;B6VGZ9;B6VH00;A0A446N8C9;F2D010;A0A446N8N3;A0A446PHR1;A0A287KG55;A0A446N8N2;A0A446PIX1;A0A446PJR3;A0A287KGB9;A0A446PIQ4;A0A446N8C7;A0A44…	A0A446N9M1;A0A287KG74;A0A446N964;A0A446PIK5;A0A446N953;A0A446N9M6;A0A446PJ63;A0A446PIG7;A0A446PJ56;A0A446N8C5;A0A446N9L1;A0A446N8D2;A0A3B6GQ57;A0A3B6EEL3;A0A446N8D6;A0A287KG61;A0A446N8D8;M0X1N3;T1LXL0;W5D4Q6;A0A446PIH5;A0A446PHS1;A0A446PHW3;A0A446N8D4;A0A446PHS8;B6VGZ9;B6VH00;A0A446N8C9;F2D010;A0A446N8N3;A0A446PHR1;A0A287KG55;A0A446N8N2;A0A446PIX1;A0A446PJR3;A0A287KGB9;A0A446PIQ4;A0A446N8C7;A0A44…	126
23.1290855407715	23.1872844696045	23.4665851593018	23.3094787597656	22.4911403656006	22.5478553771973	23.0646800994873	23.7054672241211	22.4143886566162	1	1	1	1.5	1.5	1.5	93.643	0.0067454	6.2939	0	51	1	A0A446K3Z4;A0A446K402;A0A446K3X9;A0A446K3Z3;A0A3B5Z001;A0A446K3Z8;A0A446K3X0	A0A446K3Z4;A0A446K402;A0A446K3X9;A0A446K3Z3;A0A3B5Z001;A0A446K3Z8;A0A446K3X0	232
23.6907958984375	23.1716995239258	24.1682376861572	22.7162952423096	23.8659038543701	24.0600166320801	22.4646282196045	24.0024738311768	23.8466110229492	26	3	0	36.8	3.4	0	94.509	0	19.064	198360000	51	4	A0A3B6D8Z5;A0A7H4LED9	A0A3B6D8Z5;A0A7H4LED9	276
22.8544483184814	23.6228828430176	23.6475639343262	22.6689376831055	23.1055507659912	23.964448928833	23.5006160736084	24.0835762023926	22.4858055114746	4	2	2	5.1	1.8	1.8	98.6	0	12.014	48306000	51	4	A0A3B6NQF0;A0A446VC71;A0A446VC77;A0A446VC75;A0A287TZR3;F2DMV0;M7ZDQ9;A0A446WAH3;A0A446VC70;A0A446VC69;A0A287U0B3;A0A287TZP9;A0A446WAK1;A0A446WAJ6;A0A446VC82;A0A446WAE2;A0A446WAI4	A0A3B6NQF0;A0A446VC71;A0A446VC77;A0A446VC75;A0A287TZR3;F2DMV0;M7ZDQ9;A0A446WAH3;A0A446VC70;A0A446VC69;A0A287U0B3;A0A287TZP9;A0A446WAK1;A0A446WAJ6	412
26.1622524261475	26.1134262084961	26.2735004425049	25.8895301818848	25.932559967041	25.7829933166504	22.3828601837158	25.6724414825439	23.8513202667236	13	8	2	22.9	14	3.4	81.5	0	47.431	736780000	51	33	F4Y5A7;F4Y5B4;F4Y590;A0A446LSE8;M8AYD9;F4Y589;A0A3B6D834;F4Y591;A0A3B6D503;F2CRR4;A0A446LSG3;T1N9S2	F4Y5A7;F4Y5B4;F4Y590;A0A446LSE8;M8AYD9;F4Y589;A0A3B6D834;F4Y591;A0A3B6D503;F2CRR4;A0A446LSG3	567
23.4144802093506	23.7691440582275	22.9933795928955	23.6212539672852	23.9658718109131	22.6015682220459	24.2511863708496	24.1821517944336	24.2329368591309	4	4	2	5.1	5.1	1.7	94.815	0	25.483	181350000	50	19	A0A446WAF3;A0A446WAE7;A0A3B6PKK3;A0A446WAJ7;A0A3B6QFX7;A0A3B6QDZ0;A0A3B6QGJ4	A0A446WAF3;A0A446WAE7;A0A3B6PKK3;A0A446WAJ7;A0A3B6QFX7;A0A3B6QDZ0;A0A3B6QGJ4	421
23.62668800354	23.5581188201904	22.9444694519043	22.5255126953125	23.4953804016113	24.12473487854	23.2233581542969	22.2274227142334	24.4403324127197	14	3	3	23.9	6.3	6.3	72.252	0	18.106	585450000	50	4	Q7DMU0;Q03678;M0XH58;A0A287MXS5;A0A287MXS1;A0A287MXS0	Q7DMU0;Q03678;M0XH58;A0A287MXS5	580
24.4275016784668	21.3045673370361	23.2254066467285	23.1369323730469	23.551399230957	23.6319141387939	23.4009132385254	23.0494270324707	23.6322956085205	2	2	2	3	3	3	73.918	0	11.651	30120000	48	4	M7ZYI7;A0A446JFB2;A0A446JF78;A0A287GTZ8;A0A3B5Z6R9;A0A446KF02;A0A3B5Y8V4;A0A3B6EHA2;A0A446NFI1;A0A446JFA7;A0A3B6A2S9;A0A446JF72;A0A446KF32;M7ZLG5;A0A446JFB1;A0A446NFH6;A0A287GU29;A0A446PPV8;A0A3B6GVX0;W5CAI0;A0A446NFP6;A0A446NFV2;A0A446KF01;A0A446JF97;A0A287GTW7;A0A446KF56;A0A446KF10;A0A446KFI4;A0A446KF75;A0A446JFG9;A0A446JFD8;M0UJ95;A0A446PQ48;A0A446JFB4;A0A446JFT6;A0A077RRY6;A0A446PQ68;A0A446KF…	M7ZYI7;A0A446JFB2;A0A446JF78;A0A287GTZ8;A0A3B5Z6R9;A0A446KF02;A0A3B5Y8V4;A0A3B6EHA2;A0A446NFI1;A0A446JFA7;A0A3B6A2S9;A0A446JF72;A0A446KF32;M7ZLG5;A0A446JFB1;A0A446NFH6;A0A287GU29;A0A446PPV8;A0A3B6GVX0;W5CAI0;A0A446NFP6;A0A446NFV2;A0A446KF01;A0A446JF97;A0A287GTW7;A0A446KF56;A0A446KF10;A0A446KFI4;A0A446KF75;A0A446JFG9;A0A446JFD8;M0UJ95;A0A446PQ48;A0A446JFB4;A0A446JFT6;A0A077RRY6;A0A446PQ68;A0A446KF…	110
23.9042415618896	23.2283191680908	22.5884990692139	22.9851665496826	22.0702972412109	22.9638957977295	22.7133769989014	22.4948234558105	22.8091602325439	16	4	3	29.5	11	8.7	84.206	0	23.919	430160000	48	8	A0A3B6ISM7;A0A3B6JNJ9;A0A3B6JKR7;A0A3B6JM88	A0A3B6ISM7;A0A3B6JNJ9;A0A3B6JKR7;A0A3B6JM88	344
29.1294250488281	28.5561809539795	28.513635635376	28.1768836975098	28.1378021240234	28.837947845459	29.7359733581543	29.0877265930176	29.4903907775879	37	15	3	63.1	28.2	7.9	65.56	0	90.671	9680400000	47	78	A0A446RPN6;A0A446RPN8;A0A3B6IJ76	A0A446RPN6;A0A446RPN8;A0A3B6IJ76	331
31.2339210510254	31.2719192504883	31.306173324585	31.370361328125	31.4386692047119	31.4853897094727	31.7556915283203	31.8579750061035	32.0736770629883	43	43	14	68	68	17.2	66.324	0	266.6	122990000000	47	333	I6QQ39;A0A446RB40;B7U6L4;A0A446RAL5	I6QQ39;A0A446RB40;B7U6L4;A0A446RAL5	507
24.0423183441162	22.6630191802979	23.417947769165	22.8453178405762	23.2695503234863	23.283634185791	22.6772384643555	22.9465599060059	22.29660987854	2	2	1	4	4	2.2	63.558	0	11.789	34910000	46	3	A0A446VXA0;A0A446UZV1;A0A3B6Q8W4;A0A3B6NIG8;A0A287T3K0;A0A446VX83;A0A3B6PD02;A0A3B6PEE6;A0A446VX86;A0A446UZY3;A0A446VXG1;A0A446UZY5;A0A446VX70;A0A446UZU8;M7ZIW6;A0A446VXB5;A0A3B6PE92;A0A3B6PD06;A0A446UZV6;A0A446VXD9;A0A287T3T5;A0A287T3J0;A0A446VX65;A0A446VX92;A0A287T3P7;A0A446VX79;A0A287VF44;A0A287T3G5;A0A287QNQ4;A0A287VFD1;A0A446V1E0;A0A287T3I2;A0A287T7D3;A0A3B6NJD3;A0A3B6PF69;A0A3B6Q9I0;A0A446V…	A0A446VXA0;A0A446UZV1;A0A3B6Q8W4;A0A3B6NIG8;A0A287T3K0;A0A446VX83;A0A3B6PD02;A0A3B6PEE6;A0A446VX86;A0A446UZY3;A0A446VXG1;A0A446UZY5;A0A446VX70;A0A446UZU8;M7ZIW6;A0A446VXB5;A0A3B6PE92;A0A3B6PD06;A0A446UZV6;A0A446VXD9;A0A287T3T5;A0A287T3J0;A0A446VX65;A0A446VX92;A0A287T3P7;A0A446VX79;A0A287VF44;A0A287T3G5;A0A287QNQ4;A0A287VFD1;A0A446V1E0;A0A287T3I2;A0A287T7D3;A0A3B6NJD3;A0A3B6PF69;A0A3B6Q9I0;A0A446V…	159
23.7328395843506	23.3710689544678	23.7632865905762	22.6230163574219	22.5912628173828	23.3880767822266	23.7966423034668	21.8349933624268	23.0477638244629	3	3	3	8.9	8.9	8.9	76.117	0	18.522	60657000	46	8	M7YWA0;A0A446NPZ2;A0A3B6EN93;W5CXB0;A0A446NPW1;A0A446Q029;A0A446Q023;A0A446NQ09;A0A446Q036;A0A3B6FUA8;A0A3B6ELF8;A0A446NPS9;A0A446Q035;A0A3B6FQY8;A0A446NQD1;A0A446Q024;A0A446NPS8;A0A3B6FTQ2;C3V133;A0A287LMP1;A0A446NQ53;A0A446NPY4;A0A287LMN1;A0A446NQC1;A0A446Q031;A0A287DX37;A0A446Q026;A0A3B6GZK9;A0A287DX65;A0A287LMP2;M0WFD2;A0A287LMQ9;A0A287DX51;A0A446NPT8;A0A446NQ62;A0A3B6EK69;A0A446NPZ5;A0A446Q0…	M7YWA0;A0A446NPZ2;A0A3B6EN93;W5CXB0;A0A446NPW1;A0A446Q029;A0A446Q023;A0A446NQ09;A0A446Q036;A0A3B6FUA8;A0A3B6ELF8;A0A446NPS9;A0A446Q035;A0A3B6FQY8;A0A446NQD1;A0A446Q024;A0A446NPS8;A0A3B6FTQ2;C3V133;A0A287LMP1;A0A446NQ53;A0A446NPY4;A0A287LMN1;A0A446NQC1;A0A446Q031;A0A287DX37;A0A446Q026;A0A3B6GZK9;A0A287DX65;A0A287LMP2;M0WFD2;A0A287LMQ9;A0A287DX51;A0A446NPT8;A0A446NQ62;A0A3B6EK69;A0A446NPZ5;A0A446Q0…	290
24.5754508972168	23.1521282196045	24.6895141601563	24.3291816711426	22.7235069274902	23.3615112304688	23.6078624725342	21.3756141662598	23.4516220092773	5	5	5	10.4	10.4	10.4	57.642	0	29.42	57872000	46	7	A0A446S1K5;A0A446S1K8;A0A446S1J1;A0A446S1M5;A0A446S1N7;S4VQP9;A0A446S1L2;A0A446S1N6;A0A3B6IQS5;A0A446S1M7;M7Z9B8;A0A446S1M0;A0A3B6JGQ8;A0A446S1N4;A0A446S1K6;F2DUH3;A0A446S1L8;A0A446S1L6;M0W5Z0;A0A446QZ52;A0A3B6HSG3;A0A446QZ46;A0A446QYW7;A0A3B6HUP2;A0A446QZ59;A0A446QZ38;A0A446QZ26;A0A446S1J2;A0A287NVD6;A0A287NUM6;A0A446S1K4;A0A446S1K1;A0A287NUU9;A0A446S1K3;A0A446QYX3;A0A446QZ00;A0A446QZ16;A0A446QY…	A0A446S1K5;A0A446S1K8;A0A446S1J1;A0A446S1M5;A0A446S1N7;S4VQP9;A0A446S1L2;A0A446S1N6;A0A3B6IQS5;A0A446S1M7;M7Z9B8;A0A446S1M0;A0A3B6JGQ8;A0A446S1N4;A0A446S1K6;F2DUH3;A0A446S1L8;A0A446S1L6;M0W5Z0;A0A446QZ52;A0A3B6HSG3;A0A446QZ46;A0A446QYW7;A0A3B6HUP2;A0A446QZ59;A0A446QZ38;A0A446QZ26;A0A446S1J2;A0A287NVD6;A0A287NUM6;A0A446S1K4;A0A446S1K1;A0A287NUU9;A0A446S1K3;A0A446QYX3;A0A446QZ00	338
22.9075908660889	23.8966503143311	23.5382862091064	23.3330383300781	23.7117557525635	23.4541759490967	22.9040908813477	23.7910747528076	23.4165592193604	23	5	5	44.6	11.8	11.8	68.331	0	29.091	255210000	46	10	A0A3B6JBZ2;A0A3B6JDG3;B7U6L3	A0A3B6JBZ2;A0A3B6JDG3	351
23.5124225616455	22.9994888305664	24.1241149902344	23.8907604217529	24.3577079772949	23.0237197875977	24.4585113525391	22.232328414917	23.8704204559326	3	3	3	7.5	7.5	7.5	68.238	0	17.579	38891000	46	1	A0A446UCB1;A0A3B6MTB1;A0A3B6LNA8;A0A446UC91;A0A446T557;A0A446T579;A0A446UC95;A0A3B6KKG1;A0A287E0S8;A0A287E0R8;A0A287RNW0;A0A287E0S1;A0A287E0W0;A0A287RP18;A0A287RP13;A0A287RPB1;A0A287RP57;A0A446UCD1;A0A446T574;A0A446T5A1;A0A446T571;A0A287RNV5;M0UWB0;A0A287RP64;A0A446UCA5;M7Z7H8;A0A287E0S6;A0A287RNW6;A0A287E0U8;A0A287RP60;A0A287E0U4;M0UWB1;A0A287RPB5;A0A287RP70;A0A287E0U2	A0A446UCB1;A0A3B6MTB1;A0A3B6LNA8;A0A446UC91;A0A446T557;A0A446T579;A0A446UC95;A0A3B6KKG1;A0A287E0S8;A0A287E0R8;A0A287RNW0;A0A287E0S1;A0A287E0W0;A0A287RP18;A0A287RP13;A0A287RPB1;A0A287RP57;A0A446UCD1;A0A446T574;A0A446T5A1;A0A446T571	363
23.4361362457275	24.4917945861816	23.1197109222412	23.1864070892334	25.1435546875	24.4867095947266	22.062837600708	22.8964309692383	23.3725605010986	5	5	5	13.8	13.8	13.8	70.281	0	31.956	171850000	45	12	A0A3B6HW60;A0A446RS48;A0A446RS21;A0A446R8B2;Q8VX48;A0A3B6IK29;A0A446RS16;A0A3B6JEF6;A0A446RS04;M7YFC9;F2DCQ3;A0A446R8A4;A0A287N3H8;F2D7J5;M0XQ24;F2E1S0;A0A446RS67	A0A3B6HW60;A0A446RS48;A0A446RS21;A0A446R8B2;Q8VX48;A0A3B6IK29;A0A446RS16;A0A3B6JEF6;A0A446RS04;M7YFC9;F2DCQ3;A0A446R8A4;A0A287N3H8;F2D7J5;M0XQ24;F2E1S0;A0A446RS67	320
22.2175617218018	23.4428558349609	22.551549911499	22.5609436035156	23.2592315673828	22.5395164489746	23.544397354126	22.9226036071777	23.7693386077881	3	3	2	6.8	6.8	4.4	60.961	0	17.435	36051000	45	4	A0A446WG50;A0A3B6PN36;A0A446WFL8;A0A446WFS6;A0A287UDB6;A0A446VHZ9;F2CSX3;A0A4Y1LT76;F8RP11;A0A287UDA4;A0A3B6NS49;A0A3B6QFL1;A0A446WFL9;A0A446VI04;A0A287UDS6;A0A446WFT5;A0A446WFV8;A0A446VHT2;A0A446VI00;A0A446WFZ5;A0A446WFP5;A0A446VI31;A0A446WFS5;A0A446WFM2;A0A446VHW5;A0A446VI24;A0A446WFN2;A0A446WFR4;A0A287UDB3	A0A446WG50;A0A3B6PN36;A0A446WFL8;A0A446WFS6;A0A287UDB6;A0A446VHZ9;F2CSX3;A0A4Y1LT76;F8RP11;A0A287UDA4;A0A3B6NS49;A0A3B6QFL1;A0A446WFL9;A0A446VI04;A0A287UDS6;A0A446WFT5;A0A446WFV8;A0A446VHT2;A0A446VI00;A0A446WFZ5;A0A446WFP5;A0A446VI31;A0A446WFS5;A0A446WFM2;A0A446VHW5;A0A446VI24;A0A446WFN2;A0A446WFR4	423
26.9533805847168	26.8560256958008	27.1013927459717	24.8786106109619	23.0170497894287	26.2004146575928	23.6458778381348	26.9196853637695	23.3615264892578	9	9	5	13.3	13.3	8.5	69.34	0	54.195	887080000	44	22	A0A446QT26;Q03033;A0A446UPA2;Q6LAA4;A0A1W5RMH3;M7ZWP2;A0A287P673;A0A446S7R0;A0A446S7R9;A0A446QT17;F2CRH2;A0A446TGZ7;A0A446TGZ4;A0A446S7P4;A0A446UPB1;A0A446QT36;A0A446QT05;A0A287SHN4;A0A1D5XDB6;A0A446QT27;M8AVR5;A0A446THB0;A0A446TH03;M7ZHI8;A0A446S7M1;A0A3B6IRY7;A0A446QT16;A0A446S7M6;A0A287SHN6;A0A287SHU0;A0A446QT25;A0A446UP99;A0A446UP78;A0A446UP96;A0A446TH01;A0A446QT08;A0A0U2IAL9;A0A446TH59;A0A3B…	A0A446QT26;Q03033;A0A446UPA2;Q6LAA4;A0A1W5RMH3;M7ZWP2;A0A287P673;A0A446S7R0;A0A446S7R9;A0A446QT17;F2CRH2;A0A446TGZ7;A0A446TGZ4;A0A446S7P4;A0A446UPB1;A0A446QT36;A0A446QT05;A0A287SHN4;A0A1D5XDB6;A0A446QT27;M8AVR5;A0A446THB0;A0A446TH03;M7ZHI8;A0A446S7M1;A0A3B6IRY7;A0A446QT16;A0A446S7M6;A0A287SHN6;A0A287SHU0;A0A446QT25;A0A446UP99;A0A446UP78;A0A446UP96;A0A446TH01;A0A446QT08;A0A0U2IAL9;A0A446TH59;A0A3B…	76
22.8325901031494	22.6212577819824	23.5667743682861	23.1497631072998	22.9889621734619	23.3248023986816	22.7556762695313	22.9028263092041	24.7506103515625	3	3	3	6.3	6.3	6.3	69.461	0	17.452	49598000	44	2	A0A446TGL9;A0A287E122;F2E611;A0A446UP00;A0A3B6KQV6;A0A3B6LU07;A0A446TGL6;A0A446UNV8;A0A287E139;A0A446TGQ1;A0A287E150;A0A287E118;A0A446UP02;A0A3B6AXL4;A0A446M8F5;A0A446KZK0;A0A1D5UIU6;A0A446M8C7;M8A968;A0A446M8L4;A0A287I5U9;A0A287I5P4;A0A287I5J6;A0A446M8J2;F2EL27;A0A287I5P8;A0A287I5V4;A0A446KZJ2;A0A3B6C5E9;A0A446M8C5;A0A446M8E8;A0A287I5I6;A0A287I5M0;A0A446KZI7;A0A287I5N9;A0A3B6AX46;M7ZEV2;A0A446TG…	A0A446TGL9;A0A287E122;F2E611;A0A446UP00;A0A3B6KQV6;A0A3B6LU07;A0A446TGL6;A0A446UNV8;A0A287E139;A0A446TGQ1;A0A287E150;A0A287E118;A0A446UP02;A0A3B6AXL4;A0A446M8F5;A0A446KZK0;A0A1D5UIU6;A0A446M8C7;M8A968;A0A446M8L4;A0A287I5U9;A0A287I5P4;A0A287I5J6;A0A446M8J2;F2EL27;A0A287I5P8;A0A287I5V4;A0A446KZJ2;A0A3B6C5E9;A0A446M8C5;A0A446M8E8;A0A287I5I6;A0A287I5M0;A0A446KZI7;A0A287I5N9;A0A3B6AX46	93
24.6176300048828	24.778263092041	24.5870914459229	24.6874179840088	23.7748260498047	24.9034805297852	23.7501831054688	23.8926601409912	22.4906902313232	4	4	2	9.3	9.3	3.9	65.645	0	23.827	385740000	44	22	A0A446V5X1;A0A446V627;A0A446V646;A0A3B6QDR2;A0A3B6NLQ9;A0A446V5X8;A0A446W450;A0A446W442;A0A287THB3;A0A287TGX1;A0A3B6PGD2;A0A446W437;A0A287TGW6;F2D3U6;T1NMX9;A0A287THA2;A0A446W447;A0A446V614;A0A446V5X0;A0A446W429;A0A446V5W8;A0A446W444;A0A446V5X4;A0A446V5X9;A0A446V5W7;A0A446V607;A0A287TH02;A0A287THB5;A0A446W453;A0A287TGY1;A0A446W435;F2E0E8;F2DGG1;A0A287TGX7;A0A287THC3;M1NZ63;A0A287THC8;A0A287TGX6;A…	A0A446V5X1;A0A446V627;A0A446V646;A0A3B6QDR2;A0A3B6NLQ9;A0A446V5X8;A0A446W450;A0A446W442;A0A287THB3;A0A287TGX1;A0A3B6PGD2;A0A446W437;A0A287TGW6;F2D3U6;T1NMX9;A0A287THA2;A0A446W447;A0A446V614;A0A446V5X0;A0A446W429;A0A446V5W8;A0A446W444;A0A446V5X4;A0A446V5X9;A0A446V5W7;A0A446V607;A0A287TH02;A0A287THB5;A0A446W453;A0A287TGY1;A0A446W435;F2E0E8;F2DGG1;A0A287TGX7;A0A287THC3;M1NZ63;A0A287THC8;A0A287TGX6;A…	161
27.5451011657715	27.2219562530518	26.9192314147949	27.3734340667725	26.348762512207	27.1681575775146	27.4730529785156	27.3661975860596	27.3371353149414	21	21	8	28.1	28.1	8.9	76.936	0	127.94	4472300000	44	100	A0A3B6HSA4;M7YE46;A0A3B6HNN3	A0A3B6HSA4;M7YE46;A0A3B6HNN3	311
22.857816696167	24.3658123016357	22.5696086883545	23.177640914917	22.9940013885498	23.6909465789795	23.4151058197021	23.6465225219727	22.8954601287842	2	2	2	5	5	5	70.182	0	12.293	29060000	44	5	A0A446VW91;A0A446VW74;A0A3B6PW54;A0A3B6NXL4;A0A446VWA1;A0A446VW86;A0A446VWC7;A0A446WUX4;A0A446WUM1;A0A3B6QPU3;A0A446WUP4;A0A446WUM0;A0A446WUL9;M7ZTY0;A0A287V9B8;A0A287V9D1;F2DX45;A0A287V984;A0A287V989	A0A446VW91;A0A446VW74;A0A3B6PW54;A0A3B6NXL4;A0A446VWA1;A0A446VW86;A0A446VWC7;A0A446WUX4;A0A446WUM1;A0A3B6QPU3;A0A446WUP4;A0A446WUM0;A0A446WUL9;M7ZTY0;A0A287V9B8;A0A287V9D1;F2DX45;A0A287V984;A0A287V989	418
23.6338119506836	23.3449783325195	23.6708068847656	22.9509716033936	22.4998912811279	21.5785484313965	23.2555561065674	22.6059246063232	23.0759906768799	5	5	5	14.5	14.5	14.5	69.838	0	30.83	98328000	43	8	A0A446WZS5;D1KFM7;I7HHX9;I7H0T0;I7GV17;B3V9H7;E3W168;A0A446WZT3;A0A0A6ZM52;A0A446RIJ7;A0A446RIH0;A0A8B0G1F2;A0A446WZR4;D1KFM9;A0A446RIE2;E3UZJ6;H9AXN3;H9AXN9;H9AXP0;H9AXP2;H9AXN6;E3W158;U3RA51;E3W160;Q9SYU0;A0A0A6ZLC5;I7H948;Q9SLS9;A0A8B0FZM7;Q84QW7;A0A446RID8;A0A446WZT5;P27736;Q5NKR2;Q9SLS8;Q9SQ52;W0G5H8;W0G8K7;A0A059SWT4;W0G9U6;H6VQ93;A0A0U1XU68;A0A2Z6DUA7;A0A2Z6DUC1;A0A2Z6BDX2;A0A2Z6BDX4;W8FJ6…	A0A446WZS5;D1KFM7;I7HHX9;I7H0T0;I7GV17;B3V9H7;E3W168;A0A446WZT3;A0A0A6ZM52;A0A446RIJ7;A0A446RIH0;A0A8B0G1F2;A0A446WZR4;D1KFM9;A0A446RIE2;E3UZJ6;H9AXN3;H9AXN9;H9AXP0;H9AXP2;H9AXN6;E3W158;U3RA51;E3W160;Q9SYU0;A0A0A6ZLC5;I7H948;Q9SLS9;A0A8B0FZM7;Q84QW7;A0A446RID8;A0A446WZT5;P27736;Q5NKR2;Q9SLS8;Q9SQ52;W0G5H8;W0G8K7;A0A059SWT4;W0G9U6;H6VQ93;A0A0U1XU68;A0A2Z6DUA7;A0A2Z6DUC1;A0A2Z6BDX2;A0A2Z6BDX4;W8FJ6…	4
24.1198444366455	23.9361801147461	24.5075931549072	23.2392463684082	23.6015357971191	24.0140724182129	23.0837345123291	22.0977993011475	22.5123119354248	4	4	4	10.2	10.2	10.2	62.043	0	23.616	142890000	43	4	A0A446UYN6;A0A287T2T8;A0A3B6LYY0;A0A3B6N3C7;A0A446RBV0;A0A446UYS7;F2DEW5;A0A446RBV1;A0A446RBX5;A0A446RC33;M8AQR1;A0A446UYN1;A0A3B6LYU7;A0A3B6N2R9;A0A3B6HYB1;A0A3B6HZY0;M0Y558;A0A446UYK4;A0A446RBV4	A0A446UYN6;A0A287T2T8;A0A3B6LYY0;A0A3B6N3C7;A0A446RBV0;A0A446UYS7;F2DEW5;A0A446RBV1;A0A446RBX5;A0A446RC33;M8AQR1;A0A446UYN1;A0A3B6LYU7;A0A3B6N2R9;A0A3B6HYB1;A0A3B6HZY0;M0Y558;A0A446UYK4	158
27.5553035736084	27.377742767334	27.2396335601807	27.1302585601807	27.1163444519043	27.0057106018066	23.6499919891357	27.2160453796387	23.3682594299316	21	8	4	32.4	17.1	9.4	71.016	0	48.947	1889800000	43	44	A0A3B5Z104;Q9SAU8;A0A446J4S2;A0A446J4T3;A0A446K3K0;A0A446K3J2;A0A446K3J5;A0A3B5ZWW6;A0A446J4Z1;A0A3B5Y2Z8;A0A3B5Y3L5;M8A8P8;A0A446J4T2;A0A446K3K7;A0A446J4S3;A0A446K3J7;A0A446J4V5;A0A446K3L7;A0A446J4Y1;A0A446J4T1;A0A446J518;A0A446K3K1;A0A446J4X9;A0A446K3K5;A0A446K3L6;A0A446K3L4;A0A446K3K4;F2DYT5;A0A446K3L1;A0A287G6G3;A0A446K3J0;A0A287G6E5;A0A446J4U6;A0A446J4U1;A0A446J529;A0A446K3J9;M8AVT1;A0A3B6HP…	A0A3B5Z104;Q9SAU8;A0A446J4S2;A0A446J4T3;A0A446K3K0;A0A446K3J2;A0A446K3J5;A0A3B5ZWW6;A0A446J4Z1;A0A3B5Y2Z8;A0A3B5Y3L5;M8A8P8;A0A446J4T2;A0A446K3K7;A0A446J4S3;A0A446K3J7;A0A446J4V5;A0A446K3L7;A0A446J4Y1;A0A446J4T1;A0A446J518;A0A446K3K1;A0A446J4X9;A0A446K3K5;A0A446K3L6;A0A446K3L4;A0A446K3K4;F2DYT5;A0A446K3L1;A0A287G6G3;A0A446K3J0;A0A287G6E5;A0A446J4U6;A0A446J4U1;A0A446J529;A0A446K3J9;M8AVT1;A0A3B6HP…	234
26.7516193389893	26.8233528137207	26.3665809631348	22.7091579437256	26.875020980835	26.363208770752	23.4236354827881	23.6888961791992	24.4376983642578	17	4	3	38.3	9.4	5.8	66.059	0	23.747	932000000	43	17	A0A3B6JCJ8;A0A3B6JER7	A0A3B6JCJ8;A0A3B6JER7	352
25.8957138061523	26.154972076416	25.9347438812256	25.1153717041016	25.4217224121094	25.0633220672607	25.2048988342285	25.808723449707	25.3624229431152	19	19	19	22.8	22.8	22.8	77.455	0	115.19	933600000	43	45	M8AD47;A0A446VZX1;R9W6A6;R9W924;A0A446V2D0;A0A3B6NJT9;A0A446V2E0;A0A446VZW2;A0A446V2E4;F2CS54;A0A446W014;A0A446V291;Q40058;A0A446VZV6;A0A446VZV1;A0A446VZY7;A0A446V2B5;A0A446VZW9;A0A446VZW4;A0A446V297;A0A446V2D4;A0A446VZW1;A0A446V2A7;A0A446V298;A0A446V2E1;A0A446W003;A0A446V2A3;A0A446VZX8;A0A446W073;A0A446V2C6;A0A446V2D1;A0A446V2F5;A0A446V2B9;A0A3B6SKQ0;F2D269;A0A287XIU8;A0A3B6TWJ4;A0A3B6SRC3;A0A44…	M8AD47;A0A446VZX1;R9W6A6;R9W924;A0A446V2D0;A0A3B6NJT9;A0A446V2E0;A0A446VZW2;A0A446V2E4;F2CS54;A0A446W014;A0A446V291;Q40058;A0A446VZV6;A0A446VZV1;A0A446VZY7;A0A446V2B5;A0A446VZW9;A0A446VZW4;A0A446V297;A0A446V2D4;A0A446VZW1;A0A446V2A7;A0A446V298;A0A446V2E1;A0A446W003;A0A446V2A3;A0A446VZX8;A0A446W073;A0A446V2C6;A0A446V2D1;A0A446V2F5	405
26.0198383331299	25.4054851531982	25.1576919555664	25.7958793640137	25.1223011016846	25.2556953430176	24.99338722229	25.1574211120605	25.1571521759033	8	8	1	22.3	22.3	2.5	70.621	0	49.046	830090000	42	43	A0A3B6D6N4;A0A3B6C068;M7YW45;A0A3B6ATJ8;A0A7H4LCJ0;A0A446KM91;A0A446KM53	A0A3B6D6N4;A0A3B6C068;M7YW45;A0A3B6ATJ8;A0A7H4LCJ0;A0A446KM91;A0A446KM53	251
27.8155555725098	27.7804412841797	27.6714839935303	27.8923816680908	27.5348243713379	27.7423973083496	27.3160495758057	27.6441650390625	26.8982753753662	27	27	2	39.9	39.9	3.8	71.846	0	162.08	7639800000	42	125	A0A3B6HPZ5;A0A446QRV2;M7ZPC7;A0A3B6HS11;A0A446QRW5;A0A446QS01;A0A3B6JLI9;F2E4C2;A0A287P8D6;A0A287P9J5;A0A446QSI3;A0A287P8D7;A0A287P8B3;A0A446Q4R7;A0A446Q4V1;A0A446S7X8;A0A446QRU1;A0A3B6QNY3;H1ZX80;A0A3B6HQI4;T1MQY4;A0A446S7Y2;A0A7H4LP81;A0A446QRZ9;T1NNA6;A0A3B6B737;A0A287P8P4;A0A446LJH3;F2E8I7;A0A287JGQ2;A0A287P870;O48606;A0A287JGQ1;A0A287P8A2;A0A287SS55;A0A3B6IQQ7;F2CYV1;F2DUX8;A0A287M395;A0A287…	A0A3B6HPZ5;A0A446QRV2;M7ZPC7;A0A3B6HS11;A0A446QRW5;A0A446QS01;A0A3B6JLI9;F2E4C2;A0A287P8D6;A0A287P9J5;A0A446QSI3;A0A287P8D7;A0A287P8B3	305
23.3613338470459	22.3015842437744	21.7172508239746	23.5347003936768	22.7911853790283	23.5175228118896	23.124195098877	24.4124412536621	22.898832321167	2	2	2	5.6	5.6	5.6	58.691	0	11.815	246120000	41	12	F2CTR2;A0A446NZR1;A0A446NZZ4;A0A287MB87;A0A3B5ZUA0;A0A446NZK7;A0A287MB92;A0A287MB90;A0A446K6K8;A0A446QA75;M8A5I7;A0A3B6GZ62;A0A3B6EQF4;A0A077RYX7;A0A3B5Z1S9;A0A3B5ZUT8;A0A446K6M3;A0A446NZW7;A0A287MB83;A0A287MB96;A0A287MB99;A0A3B5Z2J2;A0A446K6P0;A0A446NZX3;A0A446K6N0;A0A446Q9R7;A0A446K6Z6;A0A446NZM1;A0A3B5ZW19;A0A287MB91	F2CTR2;A0A446NZR1;A0A446NZZ4;A0A287MB87;A0A3B5ZUA0;A0A446NZK7;A0A287MB92;A0A287MB90;A0A446K6K8;A0A446QA75;M8A5I7;A0A3B6GZ62;A0A3B6EQF4;A0A077RYX7;A0A3B5Z1S9;A0A3B5ZUT8;A0A446K6M3;A0A446NZW7;A0A287MB83;A0A287MB96;A0A287MB99;A0A3B5Z2J2;A0A446K6P0;A0A446NZX3;A0A446K6N0;A0A446Q9R7;A0A446K6Z6;A0A446NZM1;A0A3B5ZW19;A0A287MB91	24
24.8567142486572	25.3941764831543	25.229419708252	24.3150653839111	24.7297744750977	24.6839962005615	24.1738662719727	22.1880054473877	22.0407199859619	12	12	12	27.8	27.8	27.8	57.796	0	72.039	541640000	41	31	A0A3B5Z6A6;A0A0U4GBE1;A0A446KDE3;A0A3B5Z5B4;A0A446KDH4;Q7XJA9;A0A446KDK7;A0A0U4GZZ4;Q0PG36;A0A446KDD1;A0A0U4FQJ0;A0A0U4GUD7;A0A3B5Y7B2;A0A446JEB0;P12299;A0A446JDZ4;A0A3B5Y860;A0A3B6A3C9;C3W8L1;U5ZZP9;U6A1T2;P30524;A0A287GQL8;A0A287GQM4;A0A2P1AB13;A0A446JDZ3;M7ZN78;A0A287GQG8;A0A287GQL2;P12300;A0A287GQK9;A0A446JDU2;O22593;A0A287GQH5;A0A287GQK8;A0A287GQJ2;B6VCM2;A0A287GQI6;B6VCM4;A0A287GQL9;A0A287G…	A0A3B5Z6A6;A0A0U4GBE1;A0A446KDE3;A0A3B5Z5B4;A0A446KDH4;Q7XJA9;A0A446KDK7;A0A0U4GZZ4;Q0PG36;A0A446KDD1;A0A0U4FQJ0;A0A0U4GUD7;A0A3B5Y7B2;A0A446JEB0;P12299;A0A446JDZ4;A0A3B5Y860;A0A3B6A3C9;C3W8L1;U5ZZP9;U6A1T2;P30524;A0A287GQL8;A0A287GQM4;A0A2P1AB13;A0A446JDZ3;M7ZN78;A0A287GQG8;A0A287GQL2;P12300;A0A287GQK9;A0A446JDU2;O22593	54
23.6668815612793	23.2384853363037	23.9835090637207	22.821252822876	23.4151668548584	22.5943965911865	23.3370590209961	22.6461811065674	22.7266292572021	5	5	5	14	14	14	57.622	0	31.922	52482000	41	6	A0A287QXY8;W5G100;A0A287QXY2;A0A3B6LJK2;A0A446SWR7;A0A446U2E3;F2CX32;F2DHU6;M7ZTH6;A0A287QXW0;A0A446U2E9;A0A446SWS2;A0A446U2G1;A0A446SWW0;A0A446U2E1;A0A287QY39;A0A287QXP3;A0A287QXQ5;A0A287QXW5;A0A446SWS5	A0A287QXY8;W5G100;A0A287QXY2;A0A3B6LJK2;A0A446SWR7;A0A446U2E3;F2CX32;F2DHU6;M7ZTH6;A0A287QXW0;A0A446U2E9;A0A446SWS2;A0A446U2G1;A0A446SWW0;A0A446U2E1;A0A287QY39	147
25.0163135528564	22.8546009063721	24.5667552947998	22.9912910461426	22.7927894592285	22.2321128845215	22.9010810852051	25.6294250488281	22.4651069641113	3	3	2	6.8	6.8	4.8	60.014	0	18.012	197100000	41	20	A0A446IT74;M7ZLN1;A0A446IT69;A0A3B5XXN8;A0A446JSM3;A0A3B5YV41;A0A446IT70;A0A446IT79;A0A446JSP2;A0A287F6R3;A0A287F6U7;F2EE28;A0A3B5ZRV3;A0A287F6T5;A0A287F6V7;A0A287F6S6;A0A3B5ZRV7;A0A287F6S1;A0A287F6T3;A0A287F6R7;A0A287F6T0;A0A287F6Q8;A0A287F6R8;A0A446JSN2	A0A446IT74;M7ZLN1;A0A446IT69;A0A3B5XXN8;A0A446JSM3;A0A3B5YV41;A0A446IT70;A0A446IT79;A0A446JSP2;A0A287F6R3;A0A287F6U7;F2EE28;A0A3B5ZRV3;A0A287F6T5;A0A287F6V7;A0A287F6S6;A0A3B5ZRV7;A0A287F6S1;A0A287F6T3;A0A287F6R7;A0A287F6T0;A0A287F6Q8;A0A287F6R8	199
23.2335891723633	22.4409942626953	22.4272003173828	23.0008640289307	23.66428565979	22.870153427124	24.4946575164795	23.2336483001709	23.6345958709717	2	1	1	6.4	5	5	75.919	0	6.5534	0	40	1	A0A3B6BZB5;A0A1D5UVU1;A0A3B6ARC4;A0A446KJZ2;M0VBA3;A0A287H3R2;A0A287H3Q6;A0A287H3W9;F2D880;F2CYQ8;A0A287H3Z2	A0A3B6BZB5;A0A1D5UVU1;A0A3B6ARC4;A0A446KJZ2;M0VBA3;A0A287H3R2;A0A287H3Q6;A0A287H3W9;F2D880;F2CYQ8;A0A287H3Z2	68
24.5784797668457	24.3653297424316	24.3685970306396	24.2599029541016	23.933910369873	22.6754245758057	23.4952926635742	22.162036895752	22.7498970031738	5	5	5	12.1	12.1	12.1	67.495	0	29.486	226730000	40	21	A0A446T4B7;A0A446UBH0;A0A446UBE9;A0A446UBE4;A0A3B6LLB0;A0A3B6MSF0;A0A3B6LMW5;A0A446UBH1;A0A3B6KJA2;A0A446T4A0;A0A446UBE2;A0A446T496;A0A446T487;A0A3B6MR11;M7ZCY8;A0A446UBH7;A0A446UBG2;A0A446UBH2;A0A446T4C4;A0A446UBG7;A0A287RL17;A0A446T4B6;A0A446UBG1;A0A446UBG5;A0A446T4A3	A0A446T4B7;A0A446UBH0;A0A446UBE9;A0A446UBE4;A0A3B6LLB0;A0A3B6MSF0;A0A3B6LMW5;A0A446UBH1;A0A3B6KJA2;A0A446T4A0;A0A446UBE2;A0A446T496;A0A446T487;A0A3B6MR11;M7ZCY8;A0A446UBH7;A0A446UBG2;A0A446UBH2;A0A446T4C4;A0A446UBG7;A0A287RL17	513
23.146411895752	26.0649681091309	26.2555503845215	26.4864177703857	26.5009231567383	26.2969284057617	23.8395156860352	25.7873344421387	25.6359424591064	11	11	11	32.5	32.5	32.5	59.248	0	67.986	1377000000	39	43	Q41534;A0A446JCU1;A0A446JCW8;A0A446JCT7;A0A3B5Y5K9;A0A446JCR1;A0A3B5Z3C7;M7ZHF2;A0A446JDC7;A0A446NM19;A0A446JCT2;A0A446KAK9;A0A446NMB3;A0A446NLZ8;A0A3B5Z4D7;A0A446KAZ4;A0A446JCZ2;M7Y940;A0A446PWT3;A0A446NM20;A0A446NM08;A0A287GJ50;A0A446NM82;A0A287GJ71;A0A446PWT4;A0A3B6EIN4;A0A3B6FP86;F2DJJ2;A0A287LBT9;A0A446NM16;A0A287GJ58;F2D5B2;A0A3B6GYF7;A0A287GJ86;A0A446NM11;A0A446JCX9;A0A446PWT5;A0A287GJ68;A…	Q41534;A0A446JCU1;A0A446JCW8;A0A446JCT7;A0A3B5Y5K9;A0A446JCR1;A0A3B5Z3C7;M7ZHF2;A0A446JDC7;A0A446NM19;A0A446JCT2;A0A446KAK9;A0A446NMB3;A0A446NLZ8;A0A3B5Z4D7;A0A446KAZ4;A0A446JCZ2;M7Y940;A0A446PWT3;A0A446NM20;A0A446NM08;A0A287GJ50;A0A446NM82;A0A287GJ71;A0A446PWT4;A0A3B6EIN4;A0A3B6FP86;F2DJJ2;A0A287LBT9;A0A446NM16;A0A287GJ58;F2D5B2;A0A3B6GYF7;A0A287GJ86;A0A446NM11;A0A446JCX9;A0A446PWT5;A0A287GJ68;A…	214
24.8141040802002	24.0045967102051	23.2340183258057	23.0350341796875	24.1420383453369	21.9235877990723	22.7409954071045	23.2914943695068	22.9585266113281	4	2	2	10.3	4.3	4.3	59.834	0	11.915	21009000	39	2	A0A446W462;A0A446V640;A0A3B6PI06;A0A446W463;A0A446W451;A0A3B6QB45;M7ZHF0;A0A446V622;A0A3B6NMA6;A0A446W446;A0A446V5Y4;A0A446W454;A0A446W448;A0A446V5Y0;A0A446V5X7;A0A446V656;A0A446W466;A0A446V619;A0A446W445;A0A446W458;A0A446V5Y5	A0A446W462;A0A446V640;A0A3B6PI06;A0A446W463;A0A446W451;A0A3B6QB45;M7ZHF0;A0A446V622;A0A3B6NMA6;A0A446W446;A0A446V5Y4;A0A446W454;A0A446W448;A0A446V5Y0;A0A446V5X7;A0A446V656;A0A446W466;A0A446V619;A0A446W445;A0A446W458;A0A446V5Y5	410
23.5218849182129	23.190544128418	22.9592971801758	22.2491817474365	22.8696746826172	23.1744709014893	22.7504634857178	23.5028495788574	24.0249423980713	1	1	1	3.6	3.6	3.6	62.101	0	6.8585	0	39	1	T1NRL7	T1NRL7	600
28.846700668335	28.8547172546387	28.766450881958	28.3412990570068	28.4334449768066	28.3072166442871	27.6698627471924	27.5474548339844	27.776180267334	28	28	2	64.5	64.5	3.3	54.193	0	170.72	17825000000	38	221	A0A3B6IQT3;B9A8E3;Q93XQ8;F8THZ8;A0A024FRN3;A0A446RWP9;A0A446RWU1;A0A446RWJ2;A0A446RWP5;B9A8E4;A0A446RWL7;F8THZ7;F8THZ5;A0A446RWJ0;A0A3B6INA7;A0A446RWH5;F8THZ6;A0A446RWJ6;A0A446RWI0;Q9FEG4;Q6JAC4;A0A446RWG6;A0A446RWH4;A0A446RWK3;Q6JAB5;Q6JAB9	A0A3B6IQT3;B9A8E3;Q93XQ8;F8THZ8;A0A024FRN3;A0A446RWP9;A0A446RWU1;A0A446RWJ2;A0A446RWP5;B9A8E4;A0A446RWL7;F8THZ7;F8THZ5;A0A446RWJ0;A0A3B6INA7;A0A446RWH5;F8THZ6;A0A446RWJ6;A0A446RWI0;Q9FEG4	2
24.5933170318604	24.1676445007324	23.0652351379395	23.0769481658936	24.2998695373535	23.8314208984375	23.7360000610352	22.7606658935547	23.2014503479004	7	3	3	19.4	9	9	55.312	0	18.679	65682000	38	7	T1MSW5;A0A1D5UZW7;A0A446KKL6;A0A446LVL7;A0A446LVJ8;A0A446KKE9;A0A446LVH4;A0A7H4LBV6;A0A446LVI3;Q40034;A0A446KKD7;A0A3B6ARY9;M0Y9X7;P34824;M7YQQ9;G8G3E6;A0A287H4H7;A0A446KKK6;A0A446LVJ3;A0A446KKI9;A0A287H4Q8;A0A446KKD3;A0A287H4I3;A0A446LVJ9;A0A446KKE6;A0A446LVI5;A0A446KKD1;A0A287E3V3;A0A287H4I2;A0A446LVK5;A0A287E3V5;A0A446KKI8;Q7X9K3;A0A446LVH8;A0A446KKE4;A0A446KKE0;A0A446KKK1;A0A446LVG9;A0A287H4P…	T1MSW5;A0A1D5UZW7;A0A446KKL6;A0A446LVL7;A0A446LVJ8;A0A446KKE9;A0A446LVH4;A0A7H4LBV6;A0A446LVI3;Q40034;A0A446KKD7;A0A3B6ARY9;M0Y9X7;P34824;M7YQQ9;G8G3E6;A0A287H4H7;A0A446KKK6;A0A446LVJ3;A0A446KKI9;A0A287H4Q8;A0A446KKD3;A0A287H4I3;A0A446LVJ9;A0A446KKE6;A0A446LVI5;A0A446KKD1;A0A287E3V3;A0A287H4I2;A0A446LVK5;A0A287E3V5	70
23.7659454345703	23.7500686645508	22.1135540008545	23.0419387817383	25.2704200744629	25.358772277832	23.3894290924072	25.4418983459473	22.9559688568115	5	5	5	9.7	9.7	9.7	51.664	0	29.879	386220000	38	17	A0A1D6S518;A0A3B6LQR3;A0A446UJG2;A0A1D6S519;A0A446UJG8;A0A287S5K9;A0A446TC11;M7YXN3;A0A287S5U2;A0A7D5I207;Q43772;A0A446TC25;A0A287S5N7;A0A446UJH2;A0A446TC05;A0A446UJE5;A0A287S5J9;A0A287S5N9;A0A446UJF9;A0A446UJG7;A0A287S5J4;A0A446UJG1;A0A446UJF8;A0A446UJE4;A0A446UJE6;A0A446TC22;A0A446W0E4;A0A446V2Q3;A0A446TCE8;A0A287HYU3;A0A287HZ73;A0A446TC09;A0A3B6NIC2;A0A3B6U1B5;A0A287S5U7	A0A1D6S518;A0A3B6LQR3;A0A446UJG2;A0A1D6S519;A0A446UJG8;A0A287S5K9;A0A446TC11;M7YXN3;A0A287S5U2;A0A7D5I207;Q43772;A0A446TC25;A0A287S5N7;A0A446UJH2;A0A446TC05;A0A446UJE5;A0A287S5J9;A0A287S5N9	87
23.0768890380859	23.7366981506348	23.8691673278809	23.2653999328613	29.040641784668	23.113862991333	23.1027202606201	28.6066780090332	23.554256439209	31	12	9	63.7	25	22.1	57.46	0	79.718	6286300000	38	53	A0A446RPN4;A0A446RPP1;A0A446RPU5;A0A3B6ILV9;A0A446RPQ0	A0A446RPN4;A0A446RPP1;A0A446RPU5;A0A3B6ILV9;A0A446RPQ0	333
23.3828010559082	23.1791133880615	22.4802360534668	23.2558403015137	22.7158813476563	22.9188709259033	25.7548599243164	26.0790786743164	22.0535144805908	27	3	2	58.5	6.4	3.2	55.256	0	19.024	922120000	37	16	A0A024FRZ0;Q9FE55;Q7FYS2;A0A3B6HYX1;A0A446R4Y4;A0A024FSC1;A0A024FR39;A0A446R507;P52589;Q4W247;M7Z226;A0A446R562;Q6JAC5;A0A446R503;A0A446R4W7;Q6JAC3;A0A287NW75;Q7XYD7;Q6JAB7;Q6JAB8;Q6JAC2;A0A287NZC6;A0A287NZQ1;A0A287P058;Q6JAC1;Q6JAC0;Q6JAB6	A0A024FRZ0;Q9FE55;Q7FYS2;A0A3B6HYX1;A0A446R4Y4;A0A024FSC1;A0A024FR39;A0A446R507;P52589;Q4W247;M7Z226;A0A446R562	1
24.3553581237793	24.0087203979492	23.2221431732178	24.4611225128174	24.9524707794189	24.8626365661621	23.7161254882813	24.3095951080322	23.1891307830811	8	8	6	25.4	25.4	19.9	52.126	0	47.969	557160000	37	4	A0A286R6F4;A0A446XG59;A0A286R6F9;Q9M4Z1;A0A446YFP7;A0A286R6V1;A0A286R6V2;A0A3B6SD73;M4VJ72;P30523;A0A446XG56;A0A446YFI7;C0KWE8;A0A446YFI6;A0A446XG57;A0A446XG31;A0A286R6S0;A0A446YFD0;A0A3B6TRD4;A3FM72;M7Z6C0;Q4L1B2;A0A3B6TJU4;A0A1D6BV11;C3W8K9;A0A3B6RFZ5;Q4L1B1;P55238;B2LUU5;C3W8K8;A0A287WRW2;A0A446YFG1;A0A446XG38;A9QW82;A0A446XG64;H6VMH0;Q7X9S8;Q8H6H6;A0A446YFF8	A0A286R6F4;A0A446XG59;A0A286R6F9;Q9M4Z1;A0A446YFP7;A0A286R6V1;A0A286R6V2;A0A3B6SD73;M4VJ72;P30523;A0A446XG56;A0A446YFI7;C0KWE8;A0A446YFI6;A0A446XG57;A0A446XG31;A0A286R6S0;A0A446YFD0;A0A3B6TRD4;A3FM72;M7Z6C0;Q4L1B2;A0A3B6TJU4;A0A1D6BV11;C3W8K9;A0A3B6RFZ5;Q4L1B1;P55238;B2LUU5;C3W8K8;A0A287WRW2;A0A446YFG1;A0A446XG38;A9QW82;A0A446XG64	92
24.5326118469238	23.1256523132324	24.9161586761475	24.5712051391602	25.0395069122314	24.6904582977295	22.8581562042236	23.5771503448486	22.6728324890137	8	8	3	24	24	12.2	62.275	0	50.491	325500000	37	24	A0A3B5YSL1;A0A446IJG2;Q1PBI3;F2CZQ3;M7YNG5;A0A446IJF8;Q1PBI4;A0A287EJI0;A0A287EJJ1;A0A287EJH4;A0A3B5XU98;A0A287EJK8;A0A287EJH0;A0A446IJH1;A0A287EJH7;A0A446IJF4;A0A287EJG5;A0A287EJG9;A0A287EJI6;A0A287EJL4;M7ZY73	A0A3B5YSL1;A0A446IJG2;Q1PBI3;F2CZQ3;M7YNG5;A0A446IJF8;Q1PBI4;A0A287EJI0;A0A287EJJ1;A0A287EJH4;A0A3B5XU98;A0A287EJK8;A0A287EJH0;A0A446IJH1;A0A287EJH7;A0A446IJF4	226
25.028434753418	23.4161586761475	23.3527393341064	22.4575977325439	22.4748878479004	24.0025234222412	23.2304439544678	23.6513023376465	24.2079963684082	3	3	3	10.9	10.9	10.9	62.332	0	17.862	28665000	37	1	A0A3B6EI40;A0A446NNJ2;M7ZWF9;A0A446NMZ9;A0A446NN25;A0A446NN61;A0A3B6GYC1;F2ELT5;A0A446PY79;A0A3B6FPL0;A0A446PXT2;A0A077S3A3;A0A446PY29;A0A287LJX3;A0A446PY24;A0A287LJX2;A0A3B6EHW7;A0A287LJX5;A0A446PY55;A0A446NN65;A0A287LJZ8	A0A3B6EI40;A0A446NNJ2;M7ZWF9;A0A446NMZ9;A0A446NN25;A0A446NN61;A0A3B6GYC1;F2ELT5;A0A446PY79;A0A3B6FPL0;A0A446PXT2;A0A077S3A3;A0A446PY29;A0A287LJX3;A0A446PY24	286
23.5008640289307	23.3858757019043	23.6735744476318	22.9431610107422	23.4496002197266	24.1836605072021	22.9697818756104	22.6319561004639	24.0607814788818	2	2	2	4.9	4.9	4.9	57.554	0	12.049	67076000	36	9	A0A446NZS6;A0A287V2I9;M7YEE2;A0A077RXS4;A0A3B6GZ83;A0A446NZY5;A0A446NZZ0;A0A3B6H3K6;A0A446VSX8;A0A3B6SC99;A0A3B6TLP3;M7Z773;A0A446VT06;A0A287V2I6;Q7XYE1;A0A446WR29;A0A446NZS3	A0A446NZS6;A0A287V2I9;M7YEE2;A0A077RXS4;A0A3B6GZ83;A0A446NZY5;A0A446NZZ0;A0A3B6H3K6;A0A446VSX8;A0A3B6SC99;A0A3B6TLP3;M7Z773;A0A446VT06;A0A287V2I6;Q7XYE1;A0A446WR29;A0A446NZS3	22
23.3602352142334	23.8076095581055	22.3967800140381	23.3743801116943	22.3411922454834	22.161548614502	23.3007774353027	23.68017578125	22.7710399627686	2	2	2	4.6	4.6	4.6	62.135	0	11.918	11791000	36	3	A0A446JNX7;A0A287EWW9;A0A287EWW4;A0A3B5XVY7;A0A287EWW2;A0A446IP09;A0A3B5YUT9;A0A3B5XW88;A0A3B5YU25;F2CRI1;A0A3B5ZS26;A0A3B5XX71;A0A287EWY0;A0A446INY9;A0A446JNY1;A0A3B5ZQH0;A0A446JNX4;A0A3B5ZQZ6;A0A446IP19;A0A446INY6;A0A446JNW9;A0A446IP22;M8A8Q5;A0A446JNY0;A0A446JNX6;A0A3B5YTP4;A0A3B5ZS88;A0A446IP66;A0A287EWW7;A0A446JNX1;A0A287EWW8;A0A446IP18;A0A446JNY3;A0A446INY4;A0A446JNX3;A0A287EWX5	A0A446JNX7;A0A287EWW9;A0A287EWW4;A0A3B5XVY7;A0A287EWW2;A0A446IP09;A0A3B5YUT9;A0A3B5XW88;A0A3B5YU25;F2CRI1;A0A3B5ZS26;A0A3B5XX71;A0A287EWY0;A0A446INY9;A0A446JNY1;A0A3B5ZQH0;A0A446JNX4;A0A3B5ZQZ6;A0A446IP19;A0A446INY6;A0A446JNW9;A0A446IP22;M8A8Q5;A0A446JNY0;A0A446JNX6;A0A3B5YTP4;A0A3B5ZS88;A0A446IP66;A0A287EWW7;A0A446JNX1;A0A287EWW8;A0A446IP18;A0A446JNY3;A0A446INY4;A0A446JNX3;A0A287EWX5	98
23.5283031463623	24.2102451324463	24.1167526245117	23.3259601593018	23.4481296539307	23.1836700439453	23.4900817871094	23.1733627319336	23.415319442749	5	5	5	9	9	9	57.891	0	30.097	137960000	36	16	A0A287EXJ4;F2E8M3;A0A446JPF6;A0A3B5XW54;A0A446IPB2;W5A874;M0UGZ2;A0A446JPE5;A0A287EXJ0;A0A446JPG8;A0A446IPC9;A0A446JPF0;A0A446JPH2;A0A446IPB9;M8B253;A0A446IPC7;A0A446JPF3	A0A287EXJ4;F2E8M3;A0A446JPF6;A0A3B5XW54;A0A446IPB2;W5A874;M0UGZ2;A0A446JPE5;A0A287EXJ0;A0A446JPG8;A0A446IPC9;A0A446JPF0;A0A446JPH2;A0A446IPB9;M8B253;A0A446IPC7;A0A446JPF3	99
22.9713935852051	24.1870136260986	23.8600425720215	23.1497268676758	22.6050758361816	23.6783695220947	22.6076774597168	22.7060432434082	23.8608951568604	17	2	2	40.3	2.4	2.4	51.027	0	11.548	101440000	36	2	A0A287NWD9;F2D284;A0A287NWJ5;P80284;M0VP83	A0A287NWD9;F2D284;A0A287NWJ5;P80284;M0VP83	136
23.7038192749023	23.78395652771	23.4978103637695	22.733757019043	23.0038070678711	22.4270496368408	25.316930770874	25.350736618042	22.6970825195313	6	6	6	17.6	17.6	17.6	61.582	0	35.896	234420000	36	9	A0A3B5XYS8;A0A446IW39;A0A446IW42;T1N5I6;A0A3B5ZT54;A0A446IW43;F2D3S4;A0A3B5ZU94;A0A446JWA3;A0A446JWB8;A0A446JWC8;A0A446JWG3;A0A3B5YY34;A0A446JWE8;A0A446JWF1;A0A3B5YWP7;A0A446JWF2	A0A3B5XYS8;A0A446IW39;A0A446IW42	200
23.6952648162842	22.5358333587646	23.6968879699707	23.2870788574219	22.7916107177734	23.8022766113281	23.1111068725586	22.3961868286133	23.5081462860107	3	3	3	10.7	10.7	10.7	64.352	0	18.874	23353000	36	2	M7ZC65;A0A446VA38;A0A446W8A6;A0A446W8A0;A0A3B6QCZ1;A0A3B6PJL2;A0A446VA48;A0A3B6NNJ8;A0A3B6NPE6;A0A446VA41;A0A446VA32;A0A446W8E3;A0A446W8A2;A0A3B6PJU8;A0A446W8D6;A0A3B6NLV6;A0A446VA19;A0A3B6QEV0;A0A3B6QFM5;A0A287TSY1;A0A287TSV2;M0XSQ2;M0XSQ1;A0A3B6PLG3;A0A287TST0;A0A446VA61;A0A287TSZ6;A0A3B6NNA5;M0XSP9;A0A287TTE4;A0A287TSU5;A0A287TSZ0;A0A446W898;A0A446W8C6;A0A287TTF1;A0A287TSY6;A0A287TSX9;A0A287TT…	M7ZC65;A0A446VA38;A0A446W8A6;A0A446W8A0;A0A3B6QCZ1;A0A3B6PJL2;A0A446VA48;A0A3B6NNJ8;A0A3B6NPE6;A0A446VA41;A0A446VA32;A0A446W8E3;A0A446W8A2;A0A3B6PJU8;A0A446W8D6;A0A3B6NLV6;A0A446VA19;A0A3B6QEV0;A0A3B6QFM5	408
24.4788951873779	23.6413593292236	23.8311882019043	24.8606014251709	24.3722553253174	24.3191375732422	23.1094741821289	23.8048400878906	23.4226856231689	6	6	6	17.8	17.8	17.8	55.439	0	36.818	210990000	36	13	M7ZYF8;A0A446VS33;A0A3B6NVL0;F2E0T2;F2DC62;A0A3B6QMZ5;A0A3B6PSA8;A0A446WPT4	M7ZYF8;A0A446VS33;A0A3B6NVL0;F2E0T2;F2DC62;A0A3B6QMZ5;A0A3B6PSA8;A0A446WPT4	416
22.3305702209473	24.1923770904541	23.8016376495361	23.3937320709229	24.1605415344238	23.9521598815918	22.6302661895752	23.8070583343506	22.7606048583984	7	7	7	22.9	22.9	22.9	59.607	0	41.554	224810000	36	18	M7ZUG3;A0A3B6RGM5;A0A3B6TGW7;A0A446X9C6;A0A446X9A3;A0A3B6SH91;A0A446Y958;A0A446Y982;A0A446Y933;A0A3B6SGJ8;A0A446Y992;A0A446X9K9;A0A446X9K6;A0A446Y998;A0A446Y965;A0A446Y957;A0A446X9H5;A0A287W9F9;A0A446X9E7;A0A287W8X1;A0A446Y968;Q93XI6;F2CVN4;A0A446Y937;A0A446Y962;A0A287W8P9;A0A3B6QKK6;A0A446WJZ9;A0A446WK06;A0A287UN71;A0A446WK32;F2CRT1;A0A287UN40;A0A287UN28;A0A3B6PPW7;A0A446WK23;A0A446X9E2	M7ZUG3;A0A3B6RGM5;A0A3B6TGW7;A0A446X9C6;A0A446X9A3;A0A3B6SH91;A0A446Y958;A0A446Y982;A0A446Y933;A0A3B6SGJ8;A0A446Y992;A0A446X9K9;A0A446X9K6;A0A446Y998;A0A446Y965;A0A446Y957;A0A446X9H5;A0A287W9F9;A0A446X9E7;A0A287W8X1;A0A446Y968;Q93XI6;F2CVN4	434
24.9746513366699	24.894718170166	24.8301639556885	24.3595104217529	24.7932758331299	24.5925197601318	23.464485168457	21.8171844482422	23.7965393066406	10	10	10	32	32	32	58.237	0	60.144	310200000	35	22	A0A287HAF0;F2DNL2;A0A446KMW8;A0A446KN43;Q40082;M0WW19;A0A3B6C0M4;A0A287HAC0;W5C4N4;A0A446KMX2;A0A3B6C380;A0A3B6ASQ9;A0A446LY27;A0A446KMV9;M7ZEB3;A0A446LY34;A0A287HAC4;M7Z030;C3SBF2;C3SBF7;C3SBF6;C3SBF5;C3SBF4;C3SBF3;A0A089FX51;C3SBF1;C3SBF0;C3SBE9;C3SBE8;C4WYI0;C3SBG1;C3SBF9;C3SBE4;C3SBE7;C3SBG3;C3SBG0;C3SBF8;A0A089G0M6;A0A089H234;A0A089H224;A0A089H1Y0;A0A089G108;A0A089G0Y7;A0A089G0Y2;A0A089FWU3;…	A0A287HAF0;F2DNL2;A0A446KMW8;A0A446KN43;Q40082;M0WW19;A0A3B6C0M4;A0A287HAC0;W5C4N4;A0A446KMX2;A0A3B6C380;A0A3B6ASQ9;A0A446LY27;A0A446KMV9;M7ZEB3;A0A446LY34	113
23.5331687927246	22.3937721252441	21.9843063354492	21.8908996582031	22.6726341247559	22.8682270050049	22.9480953216553	24.4694805145264	23.434757232666	3	3	3	9.6	9.6	9.6	45.277	0	18.957	51890000	35	6	A0A3B6AYN4;A0A446L2Q8;A0A446L2R5;A0A446L2M2;F2E8R9;A0A287ICL4;A0A446L2M1;A0A3B6B024;A0A446L2N5;A0A446MBR2;A0A3B6DDQ3;A0A446L2M6;A0A2X0S694;M7YJX1;A0A3B6C6Q3;A0A446MBQ2;M0Z873;A0A446MC02	A0A3B6AYN4;A0A446L2Q8;A0A446L2R5;A0A446L2M2;F2E8R9;A0A287ICL4;A0A446L2M1;A0A3B6B024;A0A446L2N5;A0A446MBR2;A0A3B6DDQ3;A0A446L2M6;A0A2X0S694;M7YJX1;A0A3B6C6Q3;A0A446MBQ2;M0Z873	116
24.83180809021	24.3136825561523	24.6483955383301	24.6385955810547	24.4142227172852	24.6700668334961	24.340238571167	22.2685012817383	23.4027309417725	8	8	8	23.5	23.5	23.5	47.405	0	50.829	362960000	35	35	M7YI34;A0A3B6EHG7;A0A446NJA6;M0YIA7;A0A287L7X1;A0A3B6GTN3;A0A446PUG1;A0A3B6FMD0;A0A287L7Z2;F2CQL5;A0A287L7Y1;F2D5I1;A0A287L7X3;A0A446PU39;A0A1W5KIA4;A0A287L7X4;A0A446NJD9;A0A287L7X9;A0A446PUL3;A0A446PME1;A0A287KQ48;A0A287L7W8;A0A446PME8;A0A446PMD4;A0A446PMJ1;A0A287KQ57;A0A287KQ52;A0A446NBC4;A0A3B6GRM9;A0A3B6GPL2;F2D2J4;W5D6R4;A0A446NBL6;A0A287KQ55;A0A287KQ38;A0A3B6EHT7;A0A287L7X8;A0A287KQ51;A0A3B…	M7YI34;A0A3B6EHG7;A0A446NJA6;M0YIA7;A0A287L7X1;A0A3B6GTN3;A0A446PUG1;A0A3B6FMD0;A0A287L7Z2;F2CQL5;A0A287L7Y1;F2D5I1;A0A287L7X3;A0A446PU39;A0A1W5KIA4;A0A287L7X4;A0A446NJD9;A0A287L7X9;A0A446PUL3;A0A446PME1;A0A287KQ48;A0A287L7W8;A0A446PME8;A0A446PMD4;A0A446PMJ1;A0A287KQ57;A0A287KQ52;A0A446NBC4;A0A3B6GRM9;A0A3B6GPL2;F2D2J4;W5D6R4;A0A446NBL6;A0A287KQ55;A0A287KQ38;A0A3B6EHT7;A0A287L7X8;A0A287KQ51;A0A3B…	285
24.7493457794189	24.6150970458984	24.3182411193848	24.690990447998	24.3178272247314	24.217414855957	24.9408264160156	24.4305210113525	24.3916549682617	6	6	1	18.5	18.5	2.8	57.686	0	36.512	375620000	35	34	A0A446NTB9;A0A3B6EK73;A0A3B6H0L0;A0A446NTA4;M7YLI9;A0A446NTF2;A0A446NTD2;A0A446NTC9;A0A446Q417;A0A446Q3K3;A0A446NTB0;A0A446Q3I5;A0A446NTM8;A0A446Q3K7;W5D322;A0A446Q3J5;A0A287LWA8;A0A446NTD1;A0A287LW72;A0A287LW69;A0A446Q3K6;A0A446NTC6;A0A446Q3K1;A0A446NTA5;A8QPN1;A8QPP8;A8QPM1;A8QPL0;A8QPM8;A8QPN0;A8QPS0;A0A446Q3M4;Q7XYD2;A0A446Q3K8;A0A287LWA9;A8QQ02;F2E7L0;A8QPV8;A8QPW3;A8QPW4;A8QPY6;A8QQ01	A0A446NTB9;A0A3B6EK73;A0A3B6H0L0;A0A446NTA4;M7YLI9;A0A446NTF2;A0A446NTD2;A0A446NTC9;A0A446Q417;A0A446Q3K3;A0A446NTB0;A0A446Q3I5;A0A446NTM8;A0A446Q3K7;W5D322;A0A446Q3J5;A0A287LWA8;A0A446NTD1;A0A287LW72;A0A287LW69;A0A446Q3K6;A0A446NTC6;A0A446Q3K1;A0A446NTA5;A8QPN1;A8QPP8;A8QPM1;A8QPL0;A8QPM8;A8QPN0;A8QPS0;A0A446Q3M4	288
23.992992401123	23.5008220672607	22.4196338653564	23.6593170166016	23.0372753143311	23.6053943634033	23.3722381591797	23.3899326324463	24.2507839202881	2	2	2	3.3	3.3	3.3	62.419	0	11.56	30725000	35	2	M7ZVJ8;F2E9D5;A0A3B6JMW4;A0A446QNH5;A0A3B6HSB4;A0A3B6ITL4;A0A446SB01	M7ZVJ8;F2E9D5;A0A3B6JMW4;A0A446QNH5;A0A3B6HSB4;A0A3B6ITL4;A0A446SB01	312
23.6607780456543	23.5269260406494	23.3015327453613	21.878438949585	23.4443473815918	23.346305847168	24.247932434082	23.7873592376709	23.3749237060547	5	5	1	14.6	14.6	7.9	56.015	0	29.786	196950000	35	9	A0A446XBU7;M7ZE51;A0A3B6RHN6;Q75RZ2;A0A3B6TDJ0;F2CQV9;A0A446JHC8;A0A3B5ZP91;F2E2Z7;A0A446JIF3;A0A446JH28;A0A287VJ00;A0A287VJ19;A0A3B5YQK7;A0A287WEV3;F2E2L2;A0A287WEX5;A0A3B5YSG7;M0XPY0	A0A446XBU7;M7ZE51;A0A3B6RHN6	437
23.5436496734619	24.0778160095215	22.9331512451172	22.8483905792236	23.9372386932373	23.8441219329834	22.9307689666748	23.4873580932617	22.7107067108154	4	4	4	10.8	10.8	10.8	60.295	0	24.546	167440000	34	12	A0A446Y8E7;A0A1D6D1Q3;A0A446Y8C2;A0A446X8Q7;A0A446Y8D7;M7ZE03;A0A446X8U8;A0A446Y8H5;A0A3B6SGS8;A0A287W624;A0A287W699;A0A287W635;A0A287W6A6;A0A287W622;A0A287W6Y8;F2CS69;A0A287W630;F2EJQ9;A0A287W6X8;A0A287W694;A0A3B6RG90;A0A446X8T7;A0A446X8L4;A0A446X8J8;A0A446Y8E6;A0A287W633;A0A287W6A2;A0A287W6A4	A0A446Y8E7;A0A1D6D1Q3;A0A446Y8C2;A0A446X8Q7;A0A446Y8D7;M7ZE03;A0A446X8U8;A0A446Y8H5;A0A3B6SGS8;A0A287W624;A0A287W699;A0A287W635;A0A287W6A6;A0A287W622;A0A287W6Y8;F2CS69;A0A287W630;F2EJQ9;A0A287W6X8;A0A287W694;A0A3B6RG90;A0A446X8T7;A0A446X8L4;A0A446X8J8;A0A446Y8E6;A0A287W633;A0A287W6A2;A0A287W6A4	84
23.509786605835	24.1610298156738	23.7476749420166	23.9441108703613	22.9750442504883	24.6434268951416	22.5152015686035	23.5446510314941	23.7851486206055	1	1	1	2.7	2.7	2.7	55.453	0	6.7243	0	34	2	A0A287ELD5	A0A287ELD5	96
25.0862255096436	25.1856708526611	24.7414970397949	24.4291801452637	24.1405773162842	24.5997447967529	22.0429954528809	22.8332290649414	23.2383995056152	6	6	6	12.3	12.3	12.3	64.224	0	37.104	432730000	34	24	A0A3B6A2T6;A0A446KCX0;A0A3B6A1F1;A0A446KD59;A0A3B5Y7Y1;A0A446KCX5;A0A3B5Z5S1;A0A446JDC2;A0A446KCY5;A0A446KDB0;A0A446KD19;F2DCS7;A0A287GP79;A0A287GP72;A0A287GP94;A0A287GP67;A0A287GP40;A0A287GP52;A0A287GP89;A0A287W168;F2D434;A0A287GP45;A0A287GP31;A0A287GP43;A0A287GP62;M0UG80;M0UG79;A0A287GP57	A0A3B6A2T6;A0A446KCX0;A0A3B6A1F1;A0A446KD59;A0A3B5Y7Y1;A0A446KCX5;A0A3B5Z5S1;A0A446JDC2;A0A446KCY5;A0A446KDB0;A0A446KD19;F2DCS7;A0A287GP79;A0A287GP72;A0A287GP94;A0A287GP67;A0A287GP40;A0A287GP52;A0A287GP89	217
23.3666973114014	23.4639987945557	22.7017002105713	22.9732913970947	23.3024101257324	22.8471794128418	23.1906890869141	22.9657764434814	23.738245010376	2	2	2	4.6	4.6	4.6	57.307	0	11.564	17347000	34	2	A0A446LI49;A0A446LI34;A0A3B6DKY6;A0A446LI73;A0A3B6B695;A0A446LI60;A0A7H4LNR2;A0A3B6B6H9;A0A446LI72;M7ZB28;A0A3B6CGE3;A0A287JE63;A0A446MRU3;A0A446MRV9;A0A287JEG3;A0A446MRV1;A0A3B6CE25;A0A446MRZ6;A0A287JEB4	A0A446LI49;A0A446LI34;A0A3B6DKY6;A0A446LI73;A0A3B6B695;A0A446LI60;A0A7H4LNR2;A0A3B6B6H9;A0A446LI72;M7ZB28;A0A3B6CGE3;A0A287JE63;A0A446MRU3;A0A446MRV9;A0A287JEG3;A0A446MRV1;A0A3B6CE25;A0A446MRZ6;A0A287JEB4	262
24.3935394287109	24.5047645568848	22.5213661193848	22.9363746643066	22.7741355895996	23.1081523895264	23.9900550842285	23.0766582489014	22.2405529022217	9	4	4	27.9	14	14	43.012	0	24.141	61090000	34	6	A0A3B6FP91;A0A446PP86;Q03967;A0A077RS68;A0A446PPC4	A0A3B6FP91;A0A446PP86;Q03967;A0A077RS68;A0A446PPC4	295
23.7441425323486	23.5678081512451	24.7674922943115	25.226188659668	23.6917953491211	24.4260482788086	27.4119148254395	27.5410423278809	26.8884391784668	15	15	1	48.5	48.5	9.6	38.561	0	89.741	2069600000	34	59	A0A446S4V4;A0A3B6ISW5;A0A446S4W8;A0A446S4X2	A0A446S4V4;A0A3B6ISW5;A0A446S4W8;A0A446S4X2	510
24.0250835418701	24.0613918304443	22.9627285003662	23.2427082061768	22.304349899292	23.9732360839844	23.3821468353271	22.348295211792	22.7079162597656	7	4	1	19.3	13.3	3.3	57.634	0	26.136	4868700000	34	3	Q6SNP7	Q6SNP7	590
24.106050491333	23.8703231811523	23.4612598419189	23.1371536254883	22.8334522247314	23.2927303314209	22.9915466308594	23.9840545654297	22.8747577667236	3	3	3	6.3	6.3	6.3	61.946	0	18.036	27129000	33	4	Q43207;A0A446YCX7;A0A3B6SI17;A0A446YCU6;A0A446XDE8;A0A097P7D2;A0A446YCT1;A0A446YCV6;A0A3B6RIA1;A0A3B6TIS2;A0A446XDC8;A0A446XDB0;M0YMZ9;A0A287WIC5;F2E4V6;A0A446YCT2;M0YN01;M0YN00;A0A446YD23;A0A446XDB2;A0A287WIE0;A0A287WIE8;A0A287WID8;A0A3B6BYC7;A0A446LTI7;A0A446LTH6;A0A3B6AQJ7;A0A3B6AQX6;A0A7H4LB36;A0A3B6D588;A0A1L6Z3R1;A0A446LTH9;A0A3B6ARS4;A0A3B6BY70;A0A446LTI2;F2DK32;A0A446LTH4;A0A287WIN0;A0A28…	Q43207;A0A446YCX7;A0A3B6SI17;A0A446YCU6;A0A446XDE8;A0A097P7D2;A0A446YCT1;A0A446YCV6;A0A3B6RIA1;A0A3B6TIS2;A0A446XDC8;A0A446XDB0;M0YMZ9;A0A287WIC5;F2E4V6;A0A446YCT2;M0YN01;M0YN00;A0A446YD23;A0A446XDB2;A0A287WIE0;A0A287WIE8;A0A287WID8	31
23.7065410614014	26.1520919799805	26.2432346343994	24.0233211517334	24.0697650909424	23.0256042480469	23.9537715911865	22.5360641479492	22.6824855804443	6	6	6	16.4	16.4	16.4	57.159	0	36.243	539160000	33	27	M7YGL9;A0A3B5XVF6;A0A3B5YT90;A0A446IMJ6;A0A446JM02;A0A446IMK8;A0A446IMK0;A0A3B5ZPT1;A0A446IML9;A0A446IMM4;A0A446JMG9;A0A287ESQ2;P52894;A0A287ESR3;A0A287ESQ7;A0A287ESQ8;A0A287ESN7;A0A287EST2;A0A287ESS8;A0A287ESQ6;A0A287ESQ3;A0A287ESP6;A0A287ESQ9;A0A287ESQ5;A0A287ESP9;A0A287ESS3	M7YGL9;A0A3B5XVF6;A0A3B5YT90;A0A446IMJ6;A0A446JM02;A0A446IMK8;A0A446IMK0;A0A3B5ZPT1;A0A446IML9;A0A446IMM4;A0A446JMG9;A0A287ESQ2;P52894	195
23.34228515625	24.5070114135742	23.4976539611816	24.2595310211182	22.7260818481445	23.7526435852051	22.7894725799561	22.7828712463379	22.4393405914307	2	2	2	3.4	3.4	3.4	68.395	0	11.553	62714000	33	6	A0A446SB85;A0A3B6IW77;A0A3B6HSU8;A0A446QP69;A0A3B6JL48;A0A446QNF6;A0A3B6HRZ9;A0A287PHB3;M7YMW3;A0A3B6KDS8;F2D5X1;A0A3B6LH93;A0A287PH14;A0A287PGZ4;F2CT85;F2E4P4;A0A3B6LHI6;A0A446TXQ8;A0A287PGY1;A0A287PH05;A0A446SSC7;A0A287PHX0;A0A287QK59;A0A287PHA8;A0A446QNA6;A0A287PH04;A0A287PHA2;A0A287PGW5;A0A287PGX1;A0A287QKH4;A0A287PHY9;A0A287QKL0;A0A287PH18;A0A446SBA6;A0A287PH00;A0A287QK64;A0A287QKK4;A0A287QK…	A0A446SB85;A0A3B6IW77;A0A3B6HSU8;A0A446QP69;A0A3B6JL48;A0A446QNF6;A0A3B6HRZ9;A0A287PHB3;M7YMW3;A0A3B6KDS8;F2D5X1;A0A3B6LH93;A0A287PH14;A0A287PGZ4;F2CT85;F2E4P4;A0A3B6LHI6;A0A446TXQ8;A0A287PGY1;A0A287PH05;A0A446SSC7;A0A287PHX0;A0A287QK59;A0A287PHA8;A0A446QNA6;A0A287PH04;A0A287PHA2;A0A287PGW5;A0A287PGX1;A0A287QKH4;A0A287PHY9;A0A287QKL0;A0A287PH18;A0A446SBA6;A0A287PH00;A0A287QK64;A0A287QKK4;A0A287QK…	310
23.7187747955322	22.5909843444824	22.4449424743652	23.5966777801514	22.5741672515869	23.4093799591064	23.692813873291	24.2534198760986	22.481517791748	5	5	2	15.4	15.4	7.3	46.329	0	30.201	286690000	33	4	A0A3B6JJQ0;A0A3B6ISB7;A0A446S1B9;A0A3B6HSJ4;Q9ZR33;T1MVG6;A0A446QZG0;A0A3B6JJ96;A0A446S1B4;A0A446S1B6;A0A446QZ83;A0A446QZF6;A0A446S1D3;A0A0U2GJJ3;M0XJL4;A0A0U2GJ84;A0A077RVB3;A0A446QZG2;M0XYI8;A0A3B6GW08;A0A446S1C8;A0A3B6DLY8	A0A3B6JJQ0;A0A3B6ISB7;A0A446S1B9;A0A3B6HSJ4;Q9ZR33;T1MVG6;A0A446QZG0;A0A3B6JJ96;A0A446S1B4;A0A446S1B6;A0A446QZ83;A0A446QZF6;A0A446S1D3	313
22.8957271575928	23.1411991119385	23.206880569458	23.2770290374756	23.2059268951416	24.3215866088867	23.3438301086426	22.1820507049561	23.0579624176025	4	2	2	12.5	7.9	7.9	62.014	0	11.716	23828000	33	1	A0A3B6IR14;A0A446S4N1;M7ZXD7;A0A287P0F9;A0A287P0D5;A0A287P1F9;A0A287P0B7;A0A3B6HR71;F2CW31;A0A3B6HUV0;A0A446QVG4;A0A287P0C2;A0A3B6JK87;A0A446S4I3;A0A446S4H7;A0A446QVJ5;A0A446S4I4;A0A446S4I1;A0A446S4I6;A0A446QVK5;F2DMX4;A0A287P0N5;A0A287P0G4;A0A287P1G5;A0A287P0N2;A0A287P0E0	A0A3B6IR14;A0A446S4N1;M7ZXD7;A0A287P0F9;A0A287P0D5;A0A287P1F9;A0A287P0B7;A0A3B6HR71;F2CW31;A0A3B6HUV0;A0A446QVG4;A0A287P0C2;A0A3B6JK87;A0A446S4I3;A0A446S4H7;A0A446QVJ5;A0A446S4I4;A0A446S4I1;A0A446S4I6	341
30.1771221160889	30.3288154602051	30.261589050293	30.2707500457764	30.2289428710938	30.1032466888428	30.4031429290771	30.3235645294189	30.4154853820801	25	25	16	54.2	54.2	38.7	55.334	0	153.62	46310000000	33	251	M7ZQM3;A0A446TIH9;A0A3B6KNF4;A0A446TID4	M7ZQM3;A0A446TIH9;A0A3B6KNF4;A0A446TID4	367
23.3659229278564	24.1153507232666	24.6728286743164	23.2461814880371	22.0215854644775	22.8296852111816	23.0756855010986	23.9228687286377	23.2514591217041	31	2	2	70.7	8.2	8.2	58.864	0	11.752	455230000	33	1	A0A3B6KSH4;M8B5G5;Q7X9M2;A9XG56;A9XG54;A9XG51;A9XG59;A9XG53;A9XG50	A0A3B6KSH4;M8B5G5	376
26.4987487792969	23.511661529541	23.0377998352051	26.2166938781738	23.5682716369629	26.3532123565674	22.7458400726318	22.5112724304199	23.1456508636475	18	3	3	47.3	8.9	8.9	56.58	0	18.842	369150000	33	13	A0A3B6LUV8	A0A3B6LUV8	395
22.4768409729004	26.6616649627686	26.7863121032715	27.2308673858643	26.53981590271	26.199254989624	23.2483520507813	22.047534942627	22.7767505645752	19	4	2	42.5	8.9	5.7	55.101	0	24.8	838890000	33	24	A0A3B6MYZ0	A0A3B6MYZ0	402
24.2981910705566	23.2092742919922	24.0640563964844	23.213659286499	22.9804935455322	23.0125675201416	22.8002700805664	23.9724235534668	24.1027202606201	2	2	2	7.1	7.1	7.1	40.086	0	11.942	245800000	33	11	A0A446INU0;D8L9B3;D8L9B2;A0A446JNV4;A0A446INT8;A0A446INT6;A0A446INW5;M7ZN83;A0A446JNV3;A0A446JNV8;A0A287EWU1;D8L9A4;A0A287EWS7	A0A446INU0;D8L9B3;D8L9B2;A0A446JNV4;A0A446INT8;A0A446INT6;A0A446INW5;M7ZN83;A0A446JNV3;A0A446JNV8;A0A287EWU1;D8L9A4;A0A287EWS7	468
24.8923110961914	24.7736415863037	24.442024230957	24.7749996185303	24.5250415802002	24.370792388916	24.6863498687744	24.5712642669678	24.9453430175781	12	12	1	35.6	35.6	3.5	42.196	0	72.22	418950000	33	33	A0A446NDR0;A0A446NDQ3;M8A310	A0A446NDR0;A0A446NDQ3	492
23.3044376373291	23.5796604156494	22.7528953552246	23.0735321044922	23.1876068115234	22.1278114318848	23.5707626342773	22.7498531341553	23.0227489471436	1	1	1	3.9	3.9	3.9	43.255	0	6.3932	0	33	0	D0QEJ2	D0QEJ2	559
24.3510360717773	25.1965560913086	23.079761505127	24.6777210235596	23.0949726104736	24.8087730407715	23.1887073516846	22.5085315704346	24.8255138397217	8	8	8	19.1	19.1	19.1	51.599	0	47.767	421120000	32	24	M0UQJ6;A0A446JVY3;A0A446R842;W5EE00;F2DE91;F2CRK3;M0XGG9;A0A446RSA2;A0A446SLS8;A0A446IWI0;A0A1D5X5C6;A0A1D6DJ20;A0A3B6HZM6;F2EGC8;A0A067YNJ5;W5AH12;A0A446UVD3;A0A446U1V9;F2CSU3;A0A446U1V6;A0A446JW16;A0A446RS52;A0A287SWD4;A0A446U1Z5;A0A3B6MME4;A0A446JW24;A0A287FFF9;A0A287QWS6;A0A446SWB2;A0A446U1Y8;A0A446U1W7;A0A446RF26;A0A446REZ9;M8ASF1;W5FAY5;A0A446U1V2;A0A3B6HWJ7;A0A3B5XYX6;A0A287QWU2;A0A446SWB4…	M0UQJ6;A0A446JVY3;A0A446R842;W5EE00;F2DE91;F2CRK3;M0XGG9;A0A446RSA2;A0A446SLS8;A0A446IWI0;A0A1D5X5C6;A0A1D6DJ20;A0A3B6HZM6;F2EGC8;A0A067YNJ5;W5AH12;A0A446UVD3;A0A446U1V9;F2CSU3;A0A446U1V6;A0A446JW16;A0A446RS52;A0A287SWD4;A0A446U1Z5;A0A3B6MME4;A0A446JW24;A0A287FFF9;A0A287QWS6;A0A446SWB2;A0A446U1Y8;A0A446U1W7;A0A446RF26;A0A446REZ9;M8ASF1;W5FAY5;A0A446U1V2;A0A3B6HWJ7;A0A3B5XYX6;A0A287QWU2;A0A446SWB4…	5
23.8377075195313	22.9182147979736	22.2424468994141	24.1050090789795	23.8570575714111	22.7630672454834	23.7267875671387	23.7891941070557	23.6702919006348	3	3	3	8.8	8.8	8.8	54.385	0	17.731	129050000	32	1	A0A0F6QT98;A0A3B6KIN5;A0A3B6LKM3;A0A446UA30;D9IFB7;M7ZKF7;W5FWT6;A0A446UA48;A0A287RGY4;A0A287RH61;F2CXB2;A0A287RGR7;A0A287RGY9;A0A287RGS2;A0A287RGZ3;F2E2I2;A0A446UA27;A0A287RH66;A0A287RGW2;A0A446UA65;A0A287RGV6;A0A446UA45;A0A287RH84	A0A0F6QT98;A0A3B6KIN5;A0A3B6LKM3;A0A446UA30;D9IFB7;M7ZKF7;W5FWT6;A0A446UA48;A0A287RGY4;A0A287RH61;F2CXB2;A0A287RGR7;A0A287RGY9;A0A287RGS2;A0A287RGZ3;F2E2I2;A0A446UA27;A0A287RH66;A0A287RGW2;A0A446UA65;A0A287RGV6	42
23.4956474304199	23.7294464111328	23.5598564147949	23.3259258270264	24.0208206176758	21.7108287811279	23.0496120452881	23.7696266174316	23.1032600402832	3	3	3	6.9	6.9	6.9	58.945	0	18.248	9856200	32	3	A0A446PMS1;A0A287KQT0;A0A3B6FL79;A0A287KQS6;A0A446NCD0;M7YCG2;W5D2J1;A0A446NCA6;A0A287KQT4;A0A446NCC4;A0A3B6FPB4;A0A446NCA7;A0A446PMV8;A0A446NCB7;A0A446PMT1;A0A287KQS5;A0A287KQS2;A0A287KQS9;A0A287KQS7;A0A287KQS8	A0A446PMS1;A0A287KQT0;A0A3B6FL79;A0A287KQS6;A0A446NCD0;M7YCG2;W5D2J1;A0A446NCA6;A0A287KQT4;A0A446NCC4;A0A3B6FPB4;A0A446NCA7;A0A446PMV8;A0A446NCB7;A0A446PMT1;A0A287KQS5;A0A287KQS2	127
23.4762439727783	23.7723999023438	22.006462097168	23.6165943145752	24.090648651123	23.4226760864258	23.3560466766357	23.1831531524658	23.0570507049561	2	2	2	6.1	6.1	6.1	46.964	0	12.413	10184000	32	2	A0A287NGL9;A0A287NGJ6;Q6V959;A0A287QV74;A1YE34;F2DI93;M7ZCE3;A0A446SV35;A0A446RXH7;Q08G39;A1YE31;A0A446R3M7;Q7X748;A0A446RXD0;A0A446R3M0;A0A446U1A9;A1YE28;A0A287QVI3;Q7X744;A0A446SV75;A0A446U1A7;A0A446U1G7;A0A446SV36;A0A446U1C5;A0A446U1A6;A0A446SV60;A0A446RXC8;A0A446R3U2;A0A446U1B0;A0A446SV47;A0A446R3H2;A0A446R3N2;A0A446U1G0;F2CSK7;A0A446U1A8;A0A446SV58;A0A446R3G2;A0A446SV33;Q70AI2	A0A287NGL9;A0A287NGJ6;Q6V959;A0A287QV74;A1YE34;F2DI93;M7ZCE3;A0A446SV35;A0A446RXH7;Q08G39;A1YE31;A0A446R3M7;Q7X748;A0A446RXD0;A0A446R3M0;A0A446U1A9;A1YE28;A0A287QVI3;Q7X744;A0A446SV75;A0A446U1A7;A0A446U1G7;A0A446SV36;A0A446U1C5;A0A446U1A6;A0A446SV60;A0A446RXC8;A0A446R3U2;A0A446U1B0;A0A446SV47;A0A446R3H2;A0A446R3N2;A0A446U1G0;F2CSK7;A0A446U1A8;A0A446SV58;A0A446R3G2;A0A446SV33;Q70AI2	133
23.9714164733887	24.3470973968506	24.0920848846436	23.3483409881592	22.8199787139893	22.9517288208008	23.4813385009766	22.9459857940674	23.9597015380859	2	2	2	5.9	5.9	5.9	38.872	0	11.902	23739000	32	2	A0A287X1T9;M7YK71;M0X690;A0A446YK63;A0A446XLY8;A0A3B6TLG9;A0A3B6SMZ6;A0A3B6RHJ0;A0A3B6TGL3;A0A3B6SGU1;A0A287X1X4;A0A287X1N2;A0A287X1L4;A0A287X1N8	A0A287X1T9;M7YK71;M0X690;A0A446YK63;A0A446XLY8;A0A3B6TLG9;A0A3B6SMZ6;A0A3B6RHJ0;A0A3B6TGL3;A0A3B6SGU1;A0A287X1X4;A0A287X1N2;A0A287X1L4;A0A287X1N8	182
25.8447456359863	25.8814544677734	25.6563014984131	26.4134979248047	26.2337970733643	26.2276039123535	22.8712177276611	23.9570903778076	23.2058982849121	10	10	2	27.8	27.8	7.1	57.314	0	60.702	1053300000	32	31	A0A446LZL3;A0A3B6C1C0;A0A446LZV4;A0A446LZE8;A0A3B6C197;A0A446LZN5;A0A287HDG9	A0A446LZL3;A0A3B6C1C0;A0A446LZV4;A0A446LZE8;A0A3B6C197;A0A446LZN5	268
24.0302333831787	23.7853126525879	24.0430126190186	24.1100692749023	23.5816020965576	23.1835060119629	22.5260429382324	23.1110820770264	23.8417434692383	7	2	0	27.1	6.8	0	46.798	0	12.454	80876000	32	4	M7ZP69;A0A3B6ES48;A0A3B6ETT6;A0A3B6H4U7;A0A3B6H3C5;A0A3B6H789	M7ZP69;A0A3B6ES48;A0A3B6ETT6;A0A3B6H4U7;A0A3B6H3C5;A0A3B6H789	293
23.7087078094482	23.7571048736572	23.8210182189941	23.7411632537842	22.7704887390137	22.6959705352783	23.2337188720703	22.9266490936279	23.0258026123047	12	5	2	49.9	23.9	13.4	37.341	0	29.754	211090000	32	6	A0A3B6HR26;A0A446QV48;A0A446QV63	A0A3B6HR26;A0A446QV48;A0A446QV63	307
26.8542423248291	26.6673622131348	26.2128963470459	26.7188186645508	26.4052085876465	26.4064426422119	23.35986328125	27.2501564025879	27.281888961792	8	8	5	28.5	28.5	21.2	55.47	0	49.7	1809300000	32	56	A0A446QVX2;A0A3B6HVT4;A0A446QVU8;A0A3B6JHB6;M8A214;A0A287P0T7;F2CYL7;A0A287NZS7;A0A287NZR5;A0A287NZW6	A0A446QVX2;A0A3B6HVT4;A0A446QVU8;A0A3B6JHB6	319
23.6965217590332	23.5952415466309	22.9912490844727	25.3454341888428	23.5132503509521	23.4063949584961	23.4497585296631	25.7451953887939	23.7544326782227	6	3	3	13.6	6.4	6.4	56.175	0	17.978	662960000	32	22	A0A446S486;A0A446S463;A0A3B6IQY2	A0A446S486;A0A446S463;A0A3B6IQY2	339
31.8034744262695	31.606819152832	31.8718814849854	32.3204460144043	31.6614437103271	32.3111381530762	30.8663654327393	31.0771827697754	31.2679634094238	34	34	13	74.1	74.1	34.6	58.728	0	222.37	107080000000	32	320	A0A446SKR1;A0A446SKP4;A0A446SKW7;A0A3B6IYD4;A0A3B6J0P1;A0A446SKS8;A0A446SKW6;A0A446SKQ6;A0A446SKY2;A0A446SKR2;A0A446SKV0;A0A446SKN0;A0A446SKQ4;A0A446SKS2;A0A3B6C6N3;Q4VM11;A0A446M5G7;A0A3B6C4B2;P93594;A0A446M5K4;A0A446M5G8;A0A2X0TUH3;D6BU17;A0A3B6DBK7;A0A446M5K9;A9UGN6;Q5PXV8;A0A446KVH0;A0A446KVG9;A0A446KVG7;A0A3B6AW32;A9UGN7;A9UGM9;O23978;Q4VM10;A9UGN4;A9UGN5;A0A3B6AXC6;A0A446M5I3;A9UGN3;Q5PXW6;…	A0A446SKR1;A0A446SKP4;A0A446SKW7;A0A3B6IYD4;A0A3B6J0P1;A0A446SKS8;A0A446SKW6;A0A446SKQ6;A0A446SKY2	349
27.9728450775146	27.7361507415771	27.7020015716553	27.4627151489258	27.9166698455811	27.8020572662354	26.7185573577881	27.2401809692383	27.2637386322021	19	19	1	58.6	58.6	4	46.292	0	117.09	4889700000	32	82	A0A446TT13;A0A3B6LF92;A0A3B6LF76;A0A3B6KBC7;A0A446SMD9;A0A446SMD1;A0A446TT05;A0A446SMB2;A0A3B6KCB6;A0A446SMI3;A0A446SMJ3;F2CR08;A0A446TT28;A0A3B6LEZ6;A0A446TT11;A0A446SMG5;A0A3B6LF87;F2D4W3;A0A446TSY8;A0A3B6MJW6;A0A446SM95;A0A446SM97;A0A3B6LDF8;M4QAZ4;A0A3B6KAJ3;A0A446SMC7;A0A446SMF0;A0A287Q706;A0A446TT15;A0A287Q728;A0A287Q7Q1;A0A446TT22;A0A446SM85;A0A287Q710;A0A287Q7A3;A0A446TT09;M8ABT2;A0A446SM…	A0A446TT13;A0A3B6LF92;A0A3B6LF76;A0A3B6KBC7;A0A446SMD9;A0A446SMD1;A0A446TT05;A0A446SMB2;A0A3B6KCB6;A0A446SMI3;A0A446SMJ3;F2CR08;A0A446TT28;A0A3B6LEZ6;A0A446TT11;A0A446SMG5;A0A3B6LF87;F2D4W3;A0A446TSY8;A0A3B6MJW6;A0A446SM95;A0A446SM97;A0A3B6LDF8;M4QAZ4;A0A3B6KAJ3;A0A446SMC7;A0A446SMF0;A0A287Q706;A0A446TT15;A0A287Q728;A0A287Q7Q1;A0A446TT22;A0A446SM85;A0A287Q710;A0A287Q7A3;A0A446TT09;M8ABT2;A0A446SM…	377
23.6675319671631	27.4975471496582	23.2385635375977	23.0072345733643	23.9439258575439	27.5324478149414	27.1239604949951	26.7435531616211	27.2243499755859	13	13	13	40.4	40.4	40.4	43.018	0	78.52	2962300000	32	26	A0A446W8N3;A0A446W8N2;A0A446VA98;A0A446W8C3;A0A3B6NNE0;A0A446VAC4;A0A446VAA3;A0A446W8I6;M7YG23;A0A446VAD8;A0A446W8J7;P12783;A0A446W8J0;A0A3B6QD37;A0A3B6QEZ5;A0A446VA99;A0A287TTB0;A0A3B6PJQ3;A0A446W8J5;A0A287TT66;A0A446VAB4;A0A287TTT7;A0A446VAC6;A0A446W8K8;A0A287TTC1;A0A446VAB6;A0A446VAA7;Q850M6;Q850M3;Q850M4;Q850M2;F2CZV0;A0A287TTU2;A0A446VAB1;A0A446XVD4;A0A446XVI6;A0A446XVE0;M7YXW3;A0A3B6RQL1;A0…	A0A446W8N3;A0A446W8N2;A0A446VA98;A0A446W8C3;A0A3B6NNE0;A0A446VAC4;A0A446VAA3;A0A446W8I6;M7YG23;A0A446VAD8;A0A446W8J7;P12783;A0A446W8J0;A0A3B6QD37;A0A3B6QEZ5;A0A446VA99;A0A287TTB0;A0A3B6PJQ3;A0A446W8J5;A0A287TT66;A0A446VAB4;A0A287TTT7;A0A446VAC6;A0A446W8K8;A0A287TTC1;A0A446VAB6;A0A446VAA7;Q850M6;Q850M3;Q850M4;Q850M2;F2CZV0;A0A287TTU2;A0A446VAB1	411
24.1562042236328	23.8923969268799	23.4483242034912	25.6244697570801	23.0774402618408	25.6180686950684	23.1542072296143	23.2716007232666	25.4969215393066	4	4	4	18.2	18.2	18.2	46.871	0	24.899	489350000	32	23	A0A446YMC3;A0A446YMD9;A0A3B6SP22;A0A446YMD5;A0A446YMD8;A0A3B6THH1;A0A446YMB2;A0A446YMF0;A0A3B6TMR7;A0A3B6SI60;A0A0U2L8B1;A0A446XMZ1;M0WF40;A0A3B6RM24;M8A775;A0A446XMZ4;A0A287X6Z0;A0A287X6Y5;M0WF36;A0A446XMY4;M0WF37;A0A287X774;A0A446YMF5	A0A446YMC3;A0A446YMD9;A0A3B6SP22;A0A446YMD5;A0A446YMD8;A0A3B6THH1;A0A446YMB2;A0A446YMF0;A0A3B6TMR7;A0A3B6SI60;A0A0U2L8B1;A0A446XMZ1;M0WF40;A0A3B6RM24;M8A775;A0A446XMZ4	451
30.4259243011475	30.1196632385254	30.531946182251	30.5967273712158	30.5807342529297	30.4728584289551	30.4380741119385	30.683614730835	30.1764087677002	22	19	9	50.4	44.7	20.6	56.475	0	120.32	41833000000	32	249	A0A446UQF7	A0A446UQF7	523
23.6839962005615	22.7178192138672	22.5291786193848	23.5274047851563	22.2589683532715	23.843017578125	22.9212818145752	22.0133590698242	22.9979515075684	3	3	3	12.7	12.7	12.7	39.857	0	17.787	38313000	31	4	A0A446LEI1;A0A3B6B424;M7ZV03;A0A287J6L1;A0A287J6P3;A0A287J6G6;F2E0C0;A0A446TJQ5;A0A446MNA3;W5FEV1;M7Z7X5;A0A3B6MZQ3;A0A3B6CED7;A0A287J6S3;A0A446US49;A0A446LEJ5;A0A287J6G4;A0A446LEN4;A0A446LEI2;A0A287J6H2;A0A446US58;M0V292;A0A287SNS9;A0A287SNL5;A0A7H4LM68;A0A3B6DM38;A0A287SNK0;F2D1H7;C4WYJ5;A0A287SNT3;Q5I7K6	A0A446LEI1;A0A3B6B424;M7ZV03;A0A287J6L1;A0A287J6P3;A0A287J6G6;F2E0C0;A0A446TJQ5;A0A446MNA3;W5FEV1;M7Z7X5;A0A3B6MZQ3;A0A3B6CED7;A0A287J6S3;A0A446US49;A0A446LEJ5;A0A287J6G4;A0A446LEN4;A0A446LEI2;A0A287J6H2;A0A446US58;M0V292;A0A287SNS9;A0A287SNL5;A0A7H4LM68;A0A3B6DM38;A0A287SNK0;F2D1H7;C4WYJ5;A0A287SNT3	119
23.56201171875	24.8390846252441	23.7891292572021	22.3148994445801	24.8518142700195	23.4092102050781	22.6676139831543	25.1008529663086	22.3386459350586	5	5	2	17	17	8.9	54.108	0	30.54	293780000	31	26	A0A3B6EN11;A0A446NZT1;M7YWL9;A0A287MBJ7;A0A287MBJ4;F2DI08;A0A3B6H0Z1;A0A446NZY3;A0A446NZY4;M0WX05;A0A3B6FVG8;A0A3B6FUF8;G8CN38;G8CN59;G8CN60;G8CN61;A0A287MBK1;G8CN39;A0A287MBL0;B6VCS2;A0A287MBJ8	A0A3B6EN11;A0A446NZT1;M7YWL9;A0A287MBJ7;A0A287MBJ4;F2DI08;A0A3B6H0Z1;A0A446NZY3;A0A446NZY4;M0WX05;A0A3B6FVG8;A0A3B6FUF8;G8CN38;G8CN59;G8CN60;G8CN61	291
24.4319820404053	22.8559246063232	23.480167388916	23.8704223632813	22.4144115447998	23.4853477478027	22.4577465057373	22.7388458251953	22.5876140594482	20	2	2	44.4	5.3	5.3	58.926	0	11.636	389280000	31	2	A0A3B6U9P0;A0A3B6TZ67;A0A3B6UA75;A0A3B6U3W8;A0A3B6U3N9	A0A3B6U9P0;A0A3B6TZ67;A0A3B6UA75;A0A3B6U3W8;A0A3B6U3N9	459
23.5134296417236	22.6324520111084	22.6859855651855	22.8321113586426	22.2790508270264	24.2537136077881	24.8057746887207	23.7587490081787	24.5879497528076	3	3	3	9.6	9.6	9.6	42.971	0	18.618	141640000	30	13	A0A446JZ07;A0A446JYX8;A0A3B5YZ06;A0A3B5Y1K8;A0A446J066;A0A446J067;A0A446J0A7;A0A446JYX9;A0A446JZ05;A0A446JZ04;A0A3B5Y0F9;A0A446J075;A0A3B5ZUS8;A0A446J061;A0A446JYY5;A0A3B5ZWI7;M0URS7;A0A446J060;M7ZK30;E0A9F0;A0A287FU92;A0A287FU99;A0A287FU95;A0A287FU94;A0A287FUA0	A0A446JZ07;A0A446JYX8;A0A3B5YZ06;A0A3B5Y1K8;A0A446J066;A0A446J067;A0A446J0A7;A0A446JYX9;A0A446JZ05;A0A446JZ04;A0A3B5Y0F9;A0A446J075;A0A3B5ZUS8;A0A446J061;A0A446JYY5;A0A3B5ZWI7;M0URS7;A0A446J060;M7ZK30;E0A9F0;A0A287FU92	202
25.3242645263672	25.4164161682129	25.6622905731201	25.2415809631348	25.1269950866699	25.2227306365967	24.9862003326416	24.9438247680664	24.8499546051025	12	12	2	30.7	30.7	7.6	53.226	0	71.739	791550000	30	40	A0A3B6CE27;A0A446MRT6;Q4LB19;A0A1D5URS1;A0A287JEF8;A0A446MRT9;A0A446MRV2;F2CZE7;A0A446MRV8;A0A446MS72;A0A1D5UKX4;A0A3B6CE50;A0A446LIF9;A0A446MS54;A0A446LIJ0;A0A3B6B6M7;A0A446LIK8;A0A446MS22;A0A446LID1;Q4LB20;A0A446LIH0;M7ZAK2;A0A446LIG3;A0A287JES9;A0A446MS92;A0A446MS25;A0A446LIE1;A0A3B6CE80;A0A446MS23;A0A446MS21;A0A446MS03;P32112;A0A287JF04;A0A287JEY7;A0A446MSA1;A0A446LIG9;A0A446MSC7;A0A446LIE3;A…	A0A3B6CE27;A0A446MRT6;Q4LB19;A0A1D5URS1;A0A287JEF8;A0A446MRT9;A0A446MRV2;F2CZE7;A0A446MRV8;A0A446MS72;A0A1D5UKX4;A0A3B6CE50;A0A446LIF9;A0A446MS54;A0A446LIJ0;A0A3B6B6M7;A0A446LIK8;A0A446MS22;A0A446LID1;Q4LB20;A0A446LIH0;M7ZAK2;A0A446LIG3;A0A287JES9;A0A446MS92;A0A446MS25;A0A446LIE1;A0A3B6CE80;A0A446MS23;A0A446MS21;A0A446MS03;P32112;A0A287JF04;A0A287JEY7;A0A446MSA1;A0A446LIG9;A0A446MSC7;A0A446LIE3;A…	273
25.6987209320068	23.1325206756592	25.9888019561768	25.0241985321045	22.9790267944336	25.4814529418945	23.5370445251465	23.657886505127	25.0056457519531	10	1	1	39	8.1	8.1	41.047	0	6.8534	475520000	30	20	A0A446S4P4;A0A3B6IR32;A0A446S4P7;A0A446S4Q9;A0A446S4P9;A0A446S4N3;A0A3B6IR10;A0A446S4V0;A0A446S4S2;M8A1A1;A0A3B6JHH7;A0A3B6JKB0;A0A446S4S1;A0A446S4N2;A0A446S4R3;A0A446S4P2;A0A446QVB3;A0A446S4P8;A0A3B6JKP4;A0A3B6IPJ3;A0A446QVA6;A0A446QVE1;F2DIC8;A0A287P0S6;A0A287P1X3;A0A446PDF7;A0A287H7C1;A0A287P144;A0A287H7D1;A0A077RQ21;A0A287H7L1	A0A446S4P4;A0A3B6IR32;A0A446S4P7;A0A446S4Q9;A0A446S4P9;A0A446S4N3;A0A3B6IR10;A0A446S4V0;A0A446S4S2;M8A1A1;A0A3B6JHH7;A0A3B6JKB0;A0A446S4S1;A0A446S4N2;A0A446S4R3;A0A446S4P2;A0A446QVB3;A0A446S4P8;A0A3B6JKP4;A0A3B6IPJ3;A0A446QVA6;A0A446QVE1;F2DIC8;A0A287P0S6	340
23.516429901123	23.9196681976318	22.1865768432617	23.4870624542236	22.7934188842773	22.3747520446777	22.4535293579102	23.4213562011719	23.5153923034668	3	3	1	12.3	12.3	4.4	51.349	0	18.695	291030000	30	0	A0A3B6KNU7;A0A446TDC2;A0A446TDQ8;A0A446TDD3;A0A446TDD1;A0A446TDC0;A0A3B6MYP1;A0A3B6KPK4;A0A446TDC1;A0A287S8W9;A0A287S8Y3;F2D7X4;A0A287S930;A0A287S8Z5;A0A3B6MXQ8;A0A3B6LSL3;A0A446UKR0;A0A287S962	A0A3B6KNU7;A0A446TDC2;A0A446TDQ8;A0A446TDD3;A0A446TDD1;A0A446TDC0;A0A3B6MYP1;A0A3B6KPK4;A0A446TDC1	368
22.8888893127441	23.2837905883789	23.9097537994385	23.4316959381104	23.4798622131348	23.6705760955811	22.4780750274658	23.2529544830322	23.5609893798828	3	1	1	12.7	4.1	4.1	47.372	0	6.7969	88027000	30	0	A0A446UKP4;A0A446UKQ7;A0A3B6LSV9;A0A446UKP6;A0A446UKP5;A0A446UKP2;A0A3B6LSN3;A0A446UKP8;A0A446UKR8	A0A446UKP4;A0A446UKQ7;A0A3B6LSV9;A0A446UKP6;A0A446UKP5;A0A446UKP2;A0A3B6LSN3;A0A446UKP8;A0A446UKR8	387
27.8738479614258	27.9249038696289	27.6509571075439	27.7535972595215	28.0698413848877	28.2745761871338	27.1154518127441	27.2276592254639	27.3739318847656	10	10	6	40.6	40.6	28.8	54.109	0	59.983	3263700000	30	55	A0A3B6NM79;A0A446V5G5;A0A446V5D9;M7ZMS4;A0A3B6PG25;A0A3B6QB34;A0A446W3I6;A0A3B6C7G8;A0A1D5UHV1;A0A446MDX8;A0A446ME41;A0A446MEE7;T1MLB9;A0A3B6B127;M1RLD6;A0A3B6KH48;A0A446U6G4;A0A3B6LL34;A0A446U6F0;A0A3B6LKQ2;A0A446T0Z0;A0A3B6KEK2;T1NNP8;A0A446U6F4;A0A3B6KFK2	A0A3B6NM79;A0A446V5G5;A0A446V5D9;M7ZMS4	409
27.7583713531494	27.7773723602295	27.7813167572021	27.9727344512939	27.9162139892578	27.7938957214355	26.2709560394287	26.767240524292	26.934720993042	10	10	0	32.1	32.1	0	43.944	0	61.534	3982200000	30	68	A0A446Q004	A0A446Q004	498
24.9579696655273	25.0165691375732	22.6005458831787	25.2098503112793	25.3912296295166	25.3353137969971	24.9557552337646	25.1380157470703	22.6014137268066	7	7	1	27.1	27.1	3.8	46.703	0	41.57	769980000	30	27	A0A446QIW5;A0A446QIX8;A0A080YUW6;A0A446QJ64;A0A446QJ91;A0A3B6G2X7	A0A446QIW5;A0A446QIX8;A0A080YUW6;A0A446QJ64;A0A446QJ91;A0A3B6G2X7	503
23.6091976165771	23.9639167785645	23.3990592956543	23.7790431976318	23.7457084655762	22.370906829834	22.7280731201172	23.3133792877197	22.5372524261475	5	5	5	15.4	15.4	15.4	64.652	0	29.753	141060000	30	5	A0A446TEU7;A0A446TF97;A0A446TF76;A0A446UM81;A0A3B6KPK9;Q42835;A0A446UM85;A0A287SCG4;A0A287SCK8;A0A446TFB1;A0A446UM90;A0A287SCM2;A0A287SCF9;A0A287SCG9;A0A287SCG7;A0A287SCJ0;A0A446UM99;A0A287SCL8;A0A287SCN1;A0A287SCF4;A0A3B6LRZ6;A0A287SCI5;A0A287SCL3;A0A3B6MYD3;A0A446UM80;A0A446UM93;Q8RWR5;A0A446TEX2;A0A287SCM8;A0A287SCE9;A0A446UMF4;A0A446UME6;A0A446UMA6;A0A287SCF2;A0A287SCC8;M7ZME5;A0A3B6LT90;A0A4…	A0A446TEU7;A0A446TF97;A0A446TF76;A0A446UM81;A0A3B6KPK9;Q42835;A0A446UM85;A0A287SCG4;A0A287SCK8;A0A446TFB1;A0A446UM90;A0A287SCM2;A0A287SCF9;A0A287SCG9;A0A287SCG7;A0A287SCJ0;A0A446UM99;A0A287SCL8;A0A287SCN1;A0A287SCF4;A0A3B6LRZ6;A0A287SCI5;A0A287SCL3;A0A3B6MYD3;A0A446UM80;A0A446UM93;Q8RWR5;A0A446TEX2;A0A287SCM8;A0A287SCE9;A0A446UMF4;A0A446UME6;A0A446UMA6;A0A287SCF2	516
31.3453025817871	23.5625972747803	26.5783081054688	23.8781299591064	23.3988246917725	30.9490032196045	29.8283557891846	29.4979076385498	29.0881328582764	31	15	4	70.7	38.9	14.9	58.774	0	96.718	14180000000	30	43	A0A446TRS0;A0A446TRR2;A0A446TRR9;A0A446TRS7;A0A446TRS9;A0A446TRT1;A0A446TRS4;A0A446TRS2;A0A446TRS8;A0A446TRU7;M1MQ51	A0A446TRS0;A0A446TRR2;A0A446TRR9;A0A446TRS7;A0A446TRS9;A0A446TRT1;A0A446TRS4	518
23.5112113952637	22.1506366729736	22.4210071563721	24.1811847686768	22.9314727783203	23.3280715942383	23.4625644683838	23.1171894073486	24.4481430053711	5	1	1	20.7	8.9	8.9	53.797	0	7.2494	137980000	30	8	A0A446W3I7	A0A446W3I7	534
23.1312046051025	23.303279876709	22.3317832946777	23.7815036773682	22.20458984375	22.9192352294922	22.3216342926025	23.4147548675537	22.7868556976318	10	4	1	36.2	12.8	2.7	48.256	0	25.657	871070000	30	18	M7YLN2;A0A3B6ELG3;B0FRH4;A0A446NQ44;A0A3B6EN98;A0A446NQB1;A0A446Q017;A0A287LMN7;A0A446NPX4;A0A446NPS7;A0A446NPZ4;A0A446Q015;A0A287LMM6;A0A287LML4;A0A287LML7;A0A287LMP4;A0A287LMN2	M7YLN2;A0A3B6ELG3;B0FRH4;A0A446NQ44;A0A3B6EN98;A0A446NQB1;A0A446Q017;A0A287LMN7;A0A446NPX4;A0A446NPS7;A0A446NPZ4	571
23.4151916503906	23.4744606018066	23.5206241607666	24.0240783691406	23.1055374145508	23.2250919342041	23.0226459503174	23.8365173339844	22.7024383544922	2	2	2	5.5	5.5	5.5	40.17	0	11.91	348390000	29	7	A0A287LZY0;A0A287ES83;A0A446Y254;A0A446Y247;A0A446X4D0;A0A446VZI9;A0A446K9B7;A0A446J0L3;A0A446J0K6;A0A287PH36;A0A287TQT4;A0A3B6RA79;A0A3B6GUS9;A0A3B5Y0K9;A0A287IW56;A0A1D6CJP6;A0A3B6AZ71;A0A1D6CGH8;A0A446Y2S8;D8L9K7;A0A446J9Z4;F2CZQ5;A0A3B6PGD8;F2CQJ8;A0A287TSX8;A0A287VR59;A0A287IW45;A0A446JZL1;A0A446VZP0;A0A446K974;A0A287TQN4;A0A287TQX2;A0A341WUB3;A0A446K965;A0A287FSP8;A0A446Y2R4;A0A287PMG9;A0A4…	A0A287LZY0;A0A287ES83;A0A446Y254;A0A446Y247;A0A446X4D0;A0A446VZI9;A0A446K9B7;A0A446J0L3;A0A446J0K6;A0A287PH36;A0A287TQT4;A0A3B6RA79;A0A3B6GUS9;A0A3B5Y0K9;A0A287IW56;A0A1D6CJP6;A0A3B6AZ71;A0A1D6CGH8;A0A446Y2S8;D8L9K7;A0A446J9Z4;F2CZQ5;A0A3B6PGD8;F2CQJ8;A0A287TSX8;A0A287VR59;A0A287IW45;A0A446JZL1;A0A446VZP0;A0A446K974;A0A287TQN4;A0A287TQX2;A0A341WUB3;A0A446K965;A0A287FSP8;A0A446Y2R4;A0A287PMG9;A0A4…	15
23.5009899139404	23.4514484405518	23.6112995147705	21.9945526123047	22.9620170593262	23.5393085479736	22.4241218566895	22.7721042633057	22.7740688323975	2	2	2	8.7	8.7	8.7	34.839	0	11.681	32328000	29	5	M8A0I3;A0A446L739;A0A7H4LJI4;A0A446MG55;A0A3B6C8P3;A0A446MG03;A0A287INP1;F2DRT8;A0A3B6B057;A0A446L747;A0A287INN6;A0A446L715;A0A446L717;A0A287INP0;Q9AUJ7;A0A287INU9;A0A287INQ0;A0A287INW2;A0A446MFZ1;F2EFK6;A0A287INP4	M8A0I3;A0A446L739;A0A7H4LJI4;A0A446MG55;A0A3B6C8P3;A0A446MG03;A0A287INP1;F2DRT8;A0A3B6B057;A0A446L747;A0A287INN6;A0A446L715;A0A446L717;A0A287INP0;Q9AUJ7;A0A287INU9;A0A287INQ0;A0A287INW2;A0A446MFZ1;F2EFK6;A0A287INP4	117
23.7995948791504	23.5104808807373	24.2892055511475	23.5597305297852	24.2713756561279	23.1781444549561	24.0785121917725	23.3351573944092	23.5785999298096	5	5	5	20.4	20.4	20.4	45.141	0	29.29	187120000	29	2	A0A446LM82;A0A3B6B959;A0A446LM58;A0A446LM27;A0A446LM19;A0A446LM18;A0A3B6B8E6;A0A3B6B861;A0A3B6DMI9;A0A446LM20;A0A3B6DQK3;A0A446LM60;A0A446LM45;M7ZB42;Q5MCL9;W5BVA4;A0A446LM26;A0A446MVT3;A0A446MWT0;A0A446MW79;A0A446MW11;A0A3B6CIB7;A0A446MW70;A0A446MW75;A0A3B6CFZ3;A0A3B6CG34;A0A446MW15;A0A446LM05;A0A446MVZ5;A0A446LM15;A0A446MVR0;A0A446MWB9;Q40041;Q40040;F2CWX0;F2CXA5;F2D365;A0A287JQ64;A0A287JQB4;A0…	A0A446LM82;A0A3B6B959;A0A446LM58;A0A446LM27;A0A446LM19;A0A446LM18;A0A3B6B8E6;A0A3B6B861;A0A3B6DMI9;A0A446LM20;A0A3B6DQK3;A0A446LM60;A0A446LM45;M7ZB42;Q5MCL9;W5BVA4;A0A446LM26;A0A446MVT3;A0A446MWT0;A0A446MW79;A0A446MW11;A0A3B6CIB7;A0A446MW70;A0A446MW75;A0A3B6CFZ3;A0A3B6CG34;A0A446MW15;A0A446LM05;A0A446MVZ5;A0A446LM15;A0A446MVR0;A0A446MWB9;Q40041;Q40040;F2CWX0;F2CXA5;F2D365;A0A287JQ64;A0A287JQB4;A0…	265
24.0258007049561	22.6771144866943	23.1219654083252	24.4503383636475	22.7206573486328	24.1018695831299	23.2439994812012	23.2462635040283	21.8725090026855	8	8	8	25.7	25.7	25.7	38.877	0	47.372	226280000	29	7	A0A446LMS9;A0A3B6B8S2;M8A393;A0A1D5US94;A0A446MWL2	A0A446LMS9;A0A3B6B8S2;M8A393;A0A1D5US94;A0A446MWL2	266
26.190408706665	26.2997951507568	26.1778621673584	25.9840068817139	25.9268493652344	25.8702545166016	26.5184841156006	25.7779121398926	26.1012935638428	9	9	3	33.1	33.1	15	33.968	0	54.11	1082600000	29	39	A0A446MMP1;A0A3B6CE61;A0A3B6DIS9;M0UUA7;M0UUA6;F2CUJ9	A0A446MMP1;A0A3B6CE61;A0A3B6DIS9	274
22.9461250305176	23.3747119903564	23.5466156005859	23.0676898956299	23.4531440734863	22.7106590270996	23.0186214447021	22.2120246887207	23.1036014556885	3	2	2	12.7	8.3	8.3	38.999	0	12.445	58049000	29	8	A0A3B6ECS7;A0A3B6FKP0;A0A446PEA0;A0A446PE34;A0A3B6FJS9;A0A446PDU9;A0A446PE89;A0A3B6GMS8;A0A446PE26;A0A446PEH6;A0A446PDK7;A0A446PDX2;A0A446N4K1;A0A287K632;A0A287K685;A0A446PFP5;A0A287K666;A0A446PDG7;A0A287DWU8;A0A287K640;A0A287DWW2;M7YDM6;A0A3B6EAY1;A0A3B6EAQ6;A0A3B6GR59;T1MS85;F2E8I0;A0A287DWX9;A0A446N4N5;A0A287K671;A0A446PDG5;A0A446PDL2;A0A446PFQ4;A0A446PDM2	A0A3B6ECS7;A0A3B6FKP0;A0A446PEA0;A0A446PE34;A0A3B6FJS9;A0A446PDU9;A0A446PE89;A0A3B6GMS8;A0A446PE26;A0A446PEH6;A0A446PDK7;A0A446PDX2;A0A446N4K1;A0A287K632;A0A287K685;A0A446PFP5;A0A287K666;A0A446PDG7;A0A287DWU8;A0A287K640;A0A287DWW2;M7YDM6;A0A3B6EAY1;A0A3B6EAQ6;A0A3B6GR59;T1MS85;F2E8I0;A0A287DWX9;A0A446N4N5;A0A287K671;A0A446PDG5;A0A446PDL2;A0A446PFQ4;A0A446PDM2	278
24.9337768554688	24.6688232421875	23.8184566497803	24.4179611206055	23.6951389312744	23.4467964172363	24.5774421691895	24.7910900115967	22.7669334411621	8	8	8	31.3	31.3	31.3	41.352	0	47.731	509120000	29	21	A0A3B6RHA9;W5IA32;A0A446YAR7;A0A446YAT5;A0A446XB12;A0A446XB09;A0A287WDQ8;A0A287WDC4;M8APX6;F2CWR0;A0A3B6SCH2;A0A446YAZ4;M0Z139;A0A3B6RDT2;A0A3B6THR9;A0A446XB62;Q9ZRI8;A0A1D5Y7B6;A0A3B6JEG9;Q7X9L3;A0A3B6IPH6	A0A3B6RHA9;W5IA32;A0A446YAR7;A0A446YAT5;A0A446XB12;A0A446XB09;A0A287WDQ8;A0A287WDC4;M8APX6;F2CWR0;A0A3B6SCH2;A0A446YAZ4;M0Z139;A0A3B6RDT2;A0A3B6THR9;A0A446XB62;Q9ZRI8;A0A1D5Y7B6;A0A3B6JEG9	436
23.7758960723877	23.3775310516357	21.9653911590576	22.7199020385742	22.5780372619629	22.7881660461426	24.4109172821045	23.8632278442383	21.8199901580811	1	1	1	3.1	3.1	3.1	46.342	0	6.6914	0	29	0	A0A446W321	A0A446W321	533
23.4730205535889	23.2071990966797	23.4449100494385	22.7373600006104	23.2858943939209	23.6955642700195	23.9943923950195	23.0154628753662	22.8420333862305	3	2	2	12.1	9.4	9.4	43.269	0	11.977	37958000	28	4	M8ACE0;A0A446NJ66;A0A077RTG8;A0A3B6EGE6;A0A3B6EGP6;A0A446PTX7;A0A287L780;A0A287L787;M0XD85;A0A3B6EHD7;A0A287L785;A0A287L784;A0A3B6GWS9;A0A287L777;M0XD84;A0A287L779;A0A2I6EE24;A0A2I6EE30;A0A2I6EE45;A0A2I6EE19;A0A2I6EE18;A0A2I6EE37;A0A2I6EE11;A0A2I6EE06;A0A2I6EE15;A0A2I6EE49;A0A2I6EE39;A0A2I6EE20;A8QR46;A8QR22;A8QR21;A8QR10;A8QR29;A0A2I6EE44;A0A2I6EE54;A0A2I6EE40;A0A2I6EE31;A0A2I6EE27;A0A2I6EE07;A0…	M8ACE0;A0A446NJ66;A0A077RTG8;A0A3B6EGE6;A0A3B6EGP6;A0A446PTX7;A0A287L780;A0A287L787;M0XD85;A0A3B6EHD7;A0A287L785;A0A287L784;A0A3B6GWS9;A0A287L777;M0XD84;A0A287L779	14
26.1160869598389	25.9958915710449	25.2294940948486	25.6481761932373	23.0384654998779	25.4565105438232	25.0508422851563	26.0551929473877	23.4687213897705	8	8	1	25.7	25.7	3.9	46.858	0	48.707	736200000	28	31	A0A446XRV9;P41378;F2DPE3;F2D2Z0;F2CR77;A0A3B6TVN9;A0A0C4BKH5;A0A446YR27;A0A446XRU6;A0A446XRU9;A0A446V775;A0A446W590;A0A446W575;A0A446V752;A0A3B6PID0	A0A446XRV9;P41378;F2DPE3;F2D2Z0;F2CR77;A0A3B6TVN9;A0A0C4BKH5;A0A446YR27;A0A446XRU6;A0A446XRU9	36
24.2476634979248	24.4094676971436	22.4341506958008	23.701343536377	23.4191837310791	23.6042766571045	22.6134471893311	23.0840873718262	23.0371246337891	2	2	2	7.8	7.8	7.8	38.346	0	12.113	18255000	28	4	A0A287JND5;A0A287JN82;F2CS51;A0A446MWT7;A0A446LMR0;A0A3B6CIR4;A0A3B6B9C5;A0A1D5UPJ6;A0A446LMR7;M0Z903;A0A287HSS3;A0A287HT04;M8A607	A0A287JND5;A0A287JN82;F2CS51;A0A446MWT7;A0A446LMR0;A0A3B6CIR4;A0A3B6B9C5;A0A1D5UPJ6;A0A446LMR7;M0Z903;A0A287HSS3;A0A287HT04;M8A607	64
22.9382343292236	24.6196365356445	24.7160720825195	24.3349723815918	24.5084533691406	24.1573829650879	22.8671188354492	23.4150085449219	23.8450508117676	2	2	2	10.8	10.8	10.8	51.756	0	12.858	227160000	28	21	M7Z9T4;A0A287FPY6;A0A446JYL8;A0A446IZS9;F2CRV8;A0A446JYH8;A0A3B5YXP5;A0A3B5ZV64;A0A3B5YZ07;A0A446J009;A0A3B5Y096;A0A3B5Y1D7	M7Z9T4;A0A287FPY6;A0A446JYL8;A0A446IZS9;F2CRV8;A0A446JYH8;A0A3B5YXP5;A0A3B5ZV64;A0A3B5YZ07;A0A446J009;A0A3B5Y096;A0A3B5Y1D7	104
23.980016708374	23.9270305633545	23.4405326843262	23.5593070983887	22.9633769989014	23.583423614502	23.7901287078857	22.375638961792	23.2648391723633	6	6	6	18.9	18.9	18.9	52.645	0	35.555	613310000	28	10	A0A446JAX0;A0A3B5Z4G2;A0A446KCH5;A0A446KCE2;A0A446JAW7;A0A446JB13;A0A3B5Y6C7;A0A3B6A2J7;A0A446KCU8;A0A446JB46;Q401N7;A0A446JB33;A0A446KCG0;A0A3B6A160;A0A446JBF7;A0A446KCG9;A0A446KCG3;A0A446KCG5;P42210;A0A287GN26;A0A287GMW7;A0A446KCC5;A0A3B5Y6V0;A0A446JAY6;A0A446KCQ2;A0A446KCE7;A0A446JB02;A0A446JAY1;A0A446KCL2;A0A287GMX2;A0A446JB03;A0A287GN09	A0A446JAX0;A0A3B5Z4G2;A0A446KCH5;A0A446KCE2;A0A446JAW7;A0A446JB13;A0A3B5Y6C7;A0A3B6A2J7;A0A446KCU8;A0A446JB46;Q401N7;A0A446JB33;A0A446KCG0;A0A3B6A160;A0A446JBF7;A0A446KCG9;A0A446KCG3;A0A446KCG5;P42210;A0A287GN26;A0A287GMW7;A0A446KCC5;A0A3B5Y6V0;A0A446JAY6;A0A446KCQ2;A0A446KCE7;A0A446JB02;A0A446JAY1;A0A446KCL2	215
26.6018714904785	26.4667510986328	26.7493190765381	26.0448932647705	26.4096183776855	26.7584991455078	28.0022792816162	28.4775371551514	28.0444774627686	23	23	3	70	70	14.4	35.944	0	142.16	6068500000	28	109	A0A446K4J2;A0A3B5Z0D1;A0A446K4K9;A0A446K4L1;A0A287G4A0	A0A446K4J2;A0A3B5Z0D1;A0A446K4K9;A0A446K4L1	233
23.59299659729	23.3041934967041	23.7586250305176	22.4590816497803	24.0659370422363	22.1163330078125	22.6335773468018	24.4423923492432	22.6920928955078	2	2	2	10.7	10.7	10.7	36.21	0	11.729	16467000	28	2	A0A3B6N288;A0A3B6I0W0;A0A446UWQ7;A0A446RDT9;A0A3B6HYS0;A0A446UWN8;M7ZUD8;A0A446RDZ1;A0A446RDS3;A0A446UWN4;A0A3B6LY08;A0A287SXX7;F2DED9;A0A287SY08;M0UP66	A0A3B6N288;A0A3B6I0W0;A0A446UWQ7;A0A446RDT9;A0A3B6HYS0;A0A446UWN8;M7ZUD8;A0A446RDZ1;A0A446RDS3;A0A446UWN4;A0A3B6LY08;A0A287SXX7;F2DED9;A0A287SY08;M0UP66	322
23.6487998962402	22.944673538208	23.0566635131836	23.685173034668	22.9248275756836	24.0361347198486	22.6805419921875	23.2629776000977	23.3799343109131	3	2	2	11.3	8	8	42.582	0	11.775	20384000	28	1	A0A446RUK0;A0A3B6IPZ0;M7ZA33;A0A3B6JDS9;A0A3B6HVL4;F2DHX6;A0A446R618;A0A287N9R7	A0A446RUK0;A0A3B6IPZ0;M7ZA33;A0A3B6JDS9;A0A3B6HVL4	336
22.8660278320313	24.200777053833	23.3960838317871	23.570333480835	24.0271396636963	23.0114135742188	22.1854076385498	23.1099586486816	24.1439971923828	3	3	1	12.1	12.1	2.4	43.73	0	17.849	48820000	28	4	A0A446UEI7;A0A3B6LPE6;A0A446UEJ1;A0A287RTN5;A0A287RTM1;A0A287RTQ8;A0A287RTU2;A0A446UEK6;A0A3B6LMY3;A0A287RTM6;A0A287RTC9	A0A446UEI7;A0A3B6LPE6;A0A446UEJ1	385
23.2643375396729	23.8248100280762	24.2610645294189	22.9818668365479	22.1269969940186	22.8624458312988	23.290470123291	22.913444519043	23.1312141418457	1	1	1	2.8	2.8	2.8	44.11	0	6.7372	0	28	0	A0A446VNI7;M7YPJ3;A0A446WLA4;Q5QPY3;F6IB53;A0A446VNK0;A0A446WL98;A0A3B6PS48;A0A3B6QI93;A0A446VNI2;A0A446WL91	A0A446VNI7;M7YPJ3;A0A446WLA4;Q5QPY3;F6IB53;A0A446VNK0;A0A446WL98;A0A3B6PS48;A0A3B6QI93;A0A446VNI2;A0A446WL91	424
27.9378108978271	28.0489521026611	27.7756156921387	27.1044960021973	27.42822265625	27.213451385498	26.5536346435547	26.5415458679199	27.0201969146729	16	16	13	44.1	44.1	39.9	63.693	0	99.818	4195600000	28	64	A0A446IL58;M7ZK46;A0A3B5XV32;B2CGM5;B2CGM6;A0A3B5ZP43;A5JHH2;Q08837;A0A446ILE0	A0A446IL58;M7ZK46;A0A3B5XV32;B2CGM5;B2CGM6;A0A3B5ZP43	467
25.8706531524658	26.0771446228027	25.7005996704102	26.2095165252686	25.3553829193115	25.4701995849609	26.5997447967529	26.3628902435303	26.9039173126221	10	10	4	42.7	42.7	25.5	37.827	0	60.553	1407400000	28	58	A0A446W4X1;A0A446W4Y7;A0A3B6PK17	A0A446W4X1;A0A446W4Y7;A0A3B6PK17	535
23.882869720459	23.7083072662354	28.1911239624023	28.2332935333252	22.3475952148438	23.6006412506104	28.6717205047607	28.9410610198975	23.492847442627	4	4	1	7.8	7.8	2.6	39.817	0	24.17	2204100000	28	30	R4ZA22;R4ZCU4;A0A446WTT5;A0A446WU05;A0A446WTR4;R4ZB69;R4ZC75;R4ZAN8;R4ZAP0;R4ZA24;R4ZB75;R4ZCU3;R4ZCU2;R4ZA27;R4ZC73;A0A446WTV2;A0A446WTR8;M8A3G3;R4ZB71;A0A287V806;F2EGM1	R4ZA22;R4ZCU4;A0A446WTT5;A0A446WU05;A0A446WTR4;R4ZB69;R4ZC75;R4ZAN8;R4ZAP0;R4ZA24;R4ZB75;R4ZCU3;R4ZCU2;R4ZA27;R4ZC73;A0A446WTV2;A0A446WTR8;M8A3G3;R4ZB71;A0A287V806;F2EGM1	536
22.9625091552734	23.4236755371094	23.3538055419922	22.2951564788818	23.1231651306152	23.5777320861816	23.1100654602051	24.2984733581543	23.104040145874	21	2	1	69.1	7.5	4.4	35.972	0	11.937	415930000	28	13	M7Z0X1;A0A446J5S6;A0A446J5R3;A0A3B5Y3E4;M0WU76;A0A287G4A5;A0A287G498	M7Z0X1;A0A446J5S6;A0A446J5R3;A0A3B5Y3E4	572
23.3597602844238	23.4430160522461	23.2014484405518	23.5155124664307	23.4372711181641	22.057897567749	22.8526401519775	23.9461688995361	23.1891803741455	2	2	2	7.3	7.3	7.3	40.247	0	12.497	307990000	27	15	A0A446J9J6;A0A446K203;A0A446UQX6;A0A446TIR8;F2D4A4;A0A446K238;A0A446TIQ3;A0A446J9K6;A0A446UQW9;A0A446TIR1;A0A446J9J7;A0A287PQV9;A0A3B6KRR4;A0A3B5Z0C7;A0A446TIS0;A0A3B6LUU6;A0A3B6MZW4;A0A446J9J9;A0A446K208;A0A3B5Z0J7;A0A446J9J1;A0A3B6MZ62;A0A446K267;A0A446TIS9;A0A446K232;A0A446K233;A0A446K210;A0A3B5Y4T9;A0A3B6KR19;A0A446TIU9;A0A446K260;A0A446TJ35;A0A446UQW7;A0A446J9J2;M7ZGE7;A0A3B5YZJ4;A0A446J9J5;…	A0A446J9J6;A0A446K203;A0A446UQX6;A0A446TIR8;F2D4A4;A0A446K238;A0A446TIQ3;A0A446J9K6;A0A446UQW9;A0A446TIR1;A0A446J9J7;A0A287PQV9;A0A3B6KRR4;A0A3B5Z0C7;A0A446TIS0;A0A3B6LUU6;A0A3B6MZW4;A0A446J9J9;A0A446K208;A0A3B5Z0J7;A0A446J9J1;A0A3B6MZ62;A0A446K267;A0A446TIS9;A0A446K232;A0A446K233;A0A446K210;A0A3B5Y4T9;A0A3B6KR19;A0A446TIU9;A0A446K260;A0A446TJ35;A0A446UQW7;A0A446J9J2;M7ZGE7;A0A3B5YZJ4;A0A446J9J5;…	139
23.4683380126953	23.1034278869629	23.4237785339355	22.3541049957275	23.4828433990479	23.2408466339111	23.1060218811035	22.9650058746338	23.0353412628174	8	2	2	34.4	10.4	10.4	41	0	11.951	189630000	27	29	A0A3B6D742;A0A3B6DAA8;A0A446LX04;A0A446LWS9;A0A3B6C2M3;A0A446LWX4;A0A3B6C021;A0A446LWS7;A0A446LWS2;A0A446LWX9;A0A287H7K0;A0A446LX14;A0A446LWV9;A0A446LWW5;A0A446LWR5;A0A446LWT1;A0A446LX15;A0A446LWU5;F2D224;A0A287H7E2;A0A287H7J7;A0A287H7D0;A0A287H7N0;A0A287H7J5	A0A3B6D742;A0A3B6DAA8;A0A446LX04;A0A446LWS9;A0A3B6C2M3;A0A446LWX4;A0A3B6C021;A0A446LWS7;A0A446LWS2;A0A446LWX9;A0A287H7K0;A0A446LX14;A0A446LWV9;A0A446LWW5;A0A446LWR5;A0A446LWT1;A0A446LX15;A0A446LWU5;F2D224	275
24.267261505127	22.7201747894287	23.1984195709229	23.5358943939209	23.8061199188232	22.9302272796631	23.5461673736572	23.1658058166504	22.546459197998	2	2	2	12	12	12	49.973	0	12.412	319410000	27	6	A0A446NJK1;A0A446NJS6;A0A3B6GXH6;A0A3B6GWZ4;A0A446NJP1;A0A3B6EGL9;M7YUQ6;A0A446NJN9;A0A3B6FMG9	A0A446NJK1;A0A446NJS6;A0A3B6GXH6;A0A3B6GWZ4;A0A446NJP1;A0A3B6EGL9;M7YUQ6;A0A446NJN9;A0A3B6FMG9	283
26.6916561126709	26.980110168457	27.326717376709	27.0433311462402	26.4972114562988	26.782693862915	26.5429916381836	26.9870681762695	26.9891262054443	12	12	1	62.9	62.9	2.7	40.83	0	71.935	2480400000	27	62	A0A446R388;A0A446R336;A0A3B6HTX5;A9U8H0;A9U8G4;A9U8G8;A0A446R337;A0A446R2Y7;A0A446R331;A0A446RWW9;A9U8G9;A9U8G7;A0A446R2W7;A0A446R322;O65116;O65115;O65916;A0A446R2W1;A0A3B6JHV5;O65117;Q94L27;A0A446R2Z8;O65118;D3GGS1;O65114;A0A287NDG7;A0A287NDG1;A0A287NDJ9;O65120;O65119;P05336;A0A287HAN1;A0A287HAT9;A0A446R379;A0A287NDZ5;A0A287KQV3;A0A287KQW1;A0A287KQV2;A0A287KQV0;A0A287KQV4;A0A287NDI2;A0A287NDZ7;A…	A0A446R388;A0A446R336;A0A3B6HTX5;A9U8H0;A9U8G4;A9U8G8;A0A446R337;A0A446R2Y7;A0A446R331;A0A446RWW9;A9U8G9;A9U8G7;A0A446R2W7;A0A446R322;O65116;O65115;O65916;A0A446R2W1;A0A3B6JHV5;O65117;Q94L27;A0A446R2Z8;O65118;D3GGS1;O65114;A0A287NDG7;A0A287NDG1;A0A287NDJ9;O65120;O65119;P05336	315
26.6200294494629	26.6049842834473	26.4971656799316	26.1087284088135	26.6445770263672	27.0110530853271	26.2656364440918	26.2479858398438	26.8693828582764	10	10	1	41.5	41.5	8.6	38.635	0	63.224	1858600000	27	57	A0A446QV99;A0A3B6HVK5;A0A446QVD4;A0A446QVE9;A0A446QVB7;A0A3B6HUR7;A0A446QV97;A0A446QVA7;A0A3B6HR50;A0A446QVF1;A0A446QV98;A0A446QVA0	A0A446QV99;A0A3B6HVK5;A0A446QVD4;A0A446QVE9;A0A446QVB7;A0A3B6HUR7;A0A446QV97;A0A446QVA7;A0A3B6HR50;A0A446QVF1;A0A446QV98;A0A446QVA0	317
23.9780807495117	22.5087928771973	23.2432670593262	23.7595882415771	23.329460144043	22.4465026855469	24.1754665374756	23.7948131561279	23.6943416595459	8	3	2	27	14.8	10.8	37.082	0	18.245	186900000	27	12	A0A446V6Q5;A0A3B6NLU0;A0A446V6Q0;F2CSZ7;A0A287TIF1;A0A287TIT0	A0A446V6Q5;A0A3B6NLU0;A0A446V6Q0;F2CSZ7;A0A287TIF1	407
22.7560615539551	23.7258529663086	22.4993476867676	24.6723346710205	25.4008026123047	23.4823036193848	23.8105812072754	23.9705810546875	23.6274528503418	7	4	4	22.6	13.8	13.8	47.981	0	23.797	862210000	27	8	M0XUU4;A0A287SQJ7	M0XUU4	569
28.2780818939209	27.8733196258545	28.1559085845947	28.3330879211426	28.1084899902344	28.2003688812256	28.0021724700928	27.7720947265625	27.9095344543457	13	13	11	58.5	58.5	51	36.608	0	93.411	5876200000	27	92	W5GYX5;A0A3B6NQQ5;A0A446WDH3;A0A446WDC7;A0A446WDI8;W5GM69;A0A446WDU2;A0A446WDR8;A0A446VFP7;A0A446VFQ5;A5YVV3;A0A446WDH9;A0A3B6QEY9;A0A3B6PLP7;A0A446WDK5;A0A446VFN8;A0A446VFP3;A0A096UTL2;A0A446VFP4;F2D6I8;A0A287U800;A0A446VFP0;A0A446VFN5;M0YRV8;A0A287U7R7;A0A287U7Z5;M8A8M0;A0A446WDH0;A0A287U7S7;A0A446VFK8;A0A446VFN9;P08477;A0A287U7V7;A0A287U8B2;Q9M4V4;A0A446VFP1;A0A446WDD2;A0A3B6SMQ1;Q7XJJ1;A7LI80…	W5GYX5;A0A3B6NQQ5;A0A446WDH3;A0A446WDC7;A0A446WDI8;W5GM69;A0A446WDU2;A0A446WDR8;A0A446VFP7;A0A446VFQ5;A5YVV3;A0A446WDH9;A0A3B6QEY9;A0A3B6PLP7;A0A446WDK5;A0A446VFN8;A0A446VFP3;A0A096UTL2;A0A446VFP4;F2D6I8;A0A287U800;A0A446VFP0;A0A446VFN5;M0YRV8;A0A287U7R7;A0A287U7Z5;M8A8M0;A0A446WDH0;A0A287U7S7;A0A446VFK8;A0A446VFN9;P08477;A0A287U7V7;A0A287U8B2;Q9M4V4;A0A446VFP1;A0A446WDD2;A0A3B6SMQ1;Q7XJJ1;A7LI80…	603
26.6679019927979	26.5798892974854	26.6378231048584	26.2718467712402	26.4737186431885	26.3347511291504	26.0932350158691	26.1669502258301	26.1942462921143	6	5	5	26.7	23.8	23.8	31.04	0	30.338	1678600000	26	53	A0A446RRV5;A0A446R8H0;P29305;T1MDG3;L0GED8;F2CRF1;A0A446R8H1;A0A446R8H5;A0A446RRR8;A0A446R8J4;A0A3B6HZS8;A0A446RRX5;A0A1D5XVH4;A0A446RRW4;M0YH86;A0A446RRZ4;A0A446RRX8;A0A446RRU6;A0A446RRU5;A0A446RRT2;A0A446R8I6;A0A446R8I0;A0A287N3B2;Q08G36;A0A446R8I2;A0A446RRW6;A0A446R8H2;A0A446R8H9;A0A446R8E8;A0A446RRS0;A0A287N356	A0A446RRV5;A0A446R8H0;P29305;T1MDG3;L0GED8;F2CRF1;A0A446R8H1;A0A446R8H5;A0A446RRR8;A0A446R8J4;A0A3B6HZS8;A0A446RRX5;A0A1D5XVH4;A0A446RRW4;M0YH86;A0A446RRZ4;A0A446RRX8;A0A446RRU6;A0A446RRU5;A0A446RRT2;A0A446R8I6;A0A446R8I0;A0A287N3B2;Q08G36;A0A446R8I2;A0A446RRW6;A0A446R8H2;A0A446R8H9;A0A446R8E8;A0A446RRS0	77
24.2503967285156	23.1277122497559	23.9047317504883	22.4842185974121	22.8601493835449	23.8205127716064	22.9929847717285	22.1116580963135	23.8968887329102	2	2	2	9.5	9.5	9.5	32.127	0	11.728	122560000	26	13	A0A287H284;A0A446LUE7;A0A287H2C0;A0A287H2C6;A0A287H292;A0A287H297;A0A287H264;W5C8N6;M7ZFF7;A0A446KJD9;A0A287H270;A0A446LUC4;A0A446KJG8;A0A446KJC8;A0A3B6D5N6;A0A287H287;A0A3B6D600;A0A287H2A2;A0A446KJF0;A0A3B6ARG1;A0A446KJC3;A0A446LUE8;A0A287H279;F2EFR1;A0A287H2D2;A0A287H289;A0A446KJA7;A0A287H275	A0A287H284;A0A446LUE7;A0A287H2C0;A0A287H2C6;A0A287H292;A0A287H297;A0A287H264;W5C8N6;M7ZFF7;A0A446KJD9;A0A287H270;A0A446LUC4;A0A446KJG8;A0A446KJC8;A0A3B6D5N6;A0A287H287;A0A3B6D600;A0A287H2A2;A0A446KJF0;A0A3B6ARG1;A0A446KJC3;A0A446LUE8;A0A287H279;F2EFR1;A0A287H2D2;A0A287H289;A0A446KJA7;A0A287H275	111
24.1210155487061	23.2683162689209	23.8956623077393	23.9163284301758	23.1596984863281	22.0839805603027	22.9409065246582	22.7877044677734	22.6191329956055	2	2	2	5.8	5.8	5.8	41.718	0	11.925	47715000	26	4	A0A446MY91;A0A287JSF7;A0A3B6B8V8;A0A446LNU8;A0A446LNW2;A0A3B6DN32;F2D4Y1;A0A287JSP2;A0A7H4LRB0;A0A287JSC0;A0A3B6CH13;M7ZAK9;A0A287JSL8;A0A446LNT9;A0A446MY93;A0A446LNU7;A0A446MY92;A0A446MY94;A0A446P865;A0A287JSF1;A0A077RNY6;A0A3B6GL42;A0A3B6TZE1;T1MGS0;A0A446P8F9	A0A446MY91;A0A287JSF7;A0A3B6B8V8;A0A446LNU8;A0A446LNW2;A0A3B6DN32;F2D4Y1;A0A287JSP2;A0A7H4LRB0;A0A287JSC0;A0A3B6CH13;M7ZAK9;A0A287JSL8;A0A446LNT9;A0A446MY93;A0A446LNU7;A0A446MY92;A0A446MY94;A0A446P865;A0A287JSF1;A0A077RNY6;A0A3B6GL42;A0A3B6TZE1;T1MGS0;A0A446P8F9	123
23.4480876922607	24.3016147613525	23.3512115478516	22.8637504577637	23.4539432525635	23.3620929718018	23.9953231811523	22.9961967468262	24.7131614685059	2	2	2	8.3	8.3	8.3	36.182	0	11.57	23887000	26	2	F2CRB4;A0A446S1E3;A0A3B6JJL8;A0A446QZE2;A0A446S1G5;A0A3B6IP57;L7P617;A0A446QZ62;A0A446S1E2;A0A446QZC5;A0A446S1G0;A0A446QZD4;A0A446S1D8;A0A446QZG3;A0A446S1F8;A0A3B6IQP8;A0A446QZA3;A0A3B6HW61;A0A287NVB1;A0A3B6JHB3;A0A446MTL8;A0A3B6CER2;A0A446MTW2;A0A287NUK2;A0A446S1D7;A0A3B6B6Z8;A0A446MTH1;A0A446S1F7;A0A446MTL5;A0A3B6CEQ4;A0A446QZB7;A0A287NUW0;A0A446QZ60;A0A446S1E0;A0A446QZD9;A0A446MTP5;A0A446S1D2;…	F2CRB4;A0A446S1E3;A0A3B6JJL8;A0A446QZE2;A0A446S1G5;A0A3B6IP57;L7P617;A0A446QZ62;A0A446S1E2;A0A446QZC5;A0A446S1G0;A0A446QZD4;A0A446S1D8;A0A446QZG3;A0A446S1F8;A0A3B6IQP8;A0A446QZA3;A0A3B6HW61;A0A287NVB1;A0A3B6JHB3;A0A446MTL8;A0A3B6CER2;A0A446MTW2;A0A287NUK2;A0A446S1D7;A0A3B6B6Z8;A0A446MTH1;A0A446S1F7;A0A446MTL5;A0A3B6CEQ4;A0A446QZB7;A0A287NUW0;A0A446QZ60;A0A446S1E0;A0A446QZD9;A0A446MTP5;A0A446S1D2;…	135
23.1310482025146	22.9706573486328	23.0311641693115	23.982931137085	23.949348449707	23.1545429229736	21.774320602417	23.4623756408691	22.1094837188721	1	1	1	4.2	4.2	4.2	41.332	0	6.7438	0	26	1	A0A446UDG7;A0A3B6LMC6;A0A287RRS2;M7YMB0;W5F8V5;A0A446T6D0;A0A3B6KK98;A0A287RRS8	A0A446UDG7;A0A3B6LMC6;A0A287RRS2;M7YMB0;W5F8V5;A0A446T6D0;A0A3B6KK98;A0A287RRS8	151
23.0469245910645	22.9588947296143	23.5784873962402	24.1631050109863	23.6118068695068	22.9614105224609	23.5024738311768	23.7503604888916	22.9853515625	11	1	0	42.7	11.2	0	37.659	0	6.4298	47672000	26	4	A0A3B5XVL2;A0A0M4FCE7;A0A0M3R8D4	A0A3B5XVL2	196
23.7718467712402	24.0923271179199	23.0157032012939	23.2591323852539	23.1044483184814	22.481517791748	23.3737716674805	23.4163722991943	22.0436420440674	1	1	1	5.7	5.7	5.7	34.609	0	6.5882	0	26	0	A0A3B6AT03;A0A446KLN1;M7Y964	A0A3B6AT03;A0A446KLN1;M7Y964	249
23.6708965301514	23.5743541717529	23.6412963867188	22.6701545715332	24.5641098022461	23.7289142608643	22.9148254394531	22.7559299468994	23.0312061309814	2	2	2	8.1	8.1	8.1	46.094	0	11.974	48378000	26	1	A0A446MQX7;A0A446MQZ4;A0A446MQY4;A0A446MQU6;A0A3B6CDE3;A0A446MR06;A0A446MQY9;A0A446LHB4;A0A446LHA5;A0A446LHD2;A0A287JCK8;A0A446LHC0;A0A287JCL5;A0A287JCT7;A0A7H4LNC8;F2DIQ9;A0A446LHA9;A0A3B6DJC6;A0A3B6B5W5;A0A446LH95;A0A446MQW2;A0A3B6DL13;A0A446LH69;A0A287JCX0	A0A446MQX7;A0A446MQZ4;A0A446MQY4;A0A446MQU6;A0A3B6CDE3;A0A446MR06;A0A446MQY9;A0A446LHB4;A0A446LHA5;A0A446LHD2;A0A287JCK8;A0A446LHC0;A0A287JCL5;A0A287JCT7;A0A7H4LNC8;F2DIQ9;A0A446LHA9;A0A3B6DJC6;A0A3B6B5W5;A0A446LH95;A0A446MQW2;A0A3B6DL13;A0A446LH69;A0A287JCX0	272
23.4287624359131	23.0773162841797	22.8164577484131	23.0416412353516	22.1356601715088	24.1149063110352	23.2973155975342	23.6729755401611	23.5998725891113	1	1	1	3.5	3.5	3.5	40.818	0	6.4857	15050000	26	2	A0A446U664;A0A3B6LKJ0	A0A446U664;A0A3B6LKJ0	380
23.1895046234131	23.4349098205566	24.2689590454102	23.9986019134521	24.0179424285889	22.7973365783691	22.5170860290527	22.8482036590576	23.3223514556885	2	2	2	11.1	11.1	11.1	34.918	0	11.784	0	26	3	A0A446YPZ6;A0A3B6SQ83;A0A446YQ22;A0A287XD72;A0A287XDC0;A0A287XDD2	A0A446YPZ6;A0A3B6SQ83;A0A446YQ22;A0A287XD72;A0A287XDC0;A0A287XDD2	453
23.1342945098877	23.3905944824219	24.9868068695068	24.926420211792	22.5620536804199	23.2814884185791	22.1243324279785	23.2476978302002	22.4109878540039	5	2	2	22.4	9.5	9.5	29.947	0	11.881	292140000	25	12	A0A096UL77;A0A446MF96;O24001;M8A8N8;M0X3R2;G5DFC5;A0A446MFK7;A0A446L6C2;A0A287ILT4;A0A446L6A9;A0A287ILX8;Q7XY16;A0A341RM62;A0A3B6C851;A0A287ILT2;A0A287ILX3;A0A446MFA2;A0A446L6C4;A0A287DVZ0;A0A287DVY6;A0A287DVZ3;A0A446L6A1;Q5XUU8;A0A446L6K2;A0A287ILX4;A0A446L6D2;A0A446MFE7	A0A096UL77;A0A446MF96;O24001;M8A8N8;M0X3R2;G5DFC5;A0A446MFK7;A0A446L6C2;A0A287ILT4;A0A446L6A9;A0A287ILX8;Q7XY16;A0A341RM62;A0A3B6C851;A0A287ILT2;A0A287ILX3;A0A446MFA2;A0A446L6C4;A0A287DVZ0;A0A287DVY6;A0A287DVZ3;A0A446L6A1;Q5XUU8;A0A446L6K2;A0A287ILX4;A0A446L6D2;A0A446MFE7	30
22.9614315032959	22.6894569396973	24.5717849731445	22.5342216491699	23.375789642334	23.0005302429199	22.9627933502197	22.8464164733887	23.9086742401123	1	1	1	3.5	3.5	3.5	33.611	0	6.6741	0	25	0	A0A287UAM7;A0A446VGP1;A0A446VGX9;A0A3B6QFG6;A0A446WEZ9;A0A446WET4;A0A446VGT6;A0A446VGZ0;A0A287UAN6;M8B120;F2D1J8;A0A446VGX1;A0A287UAS4;A0A1D6B2M0;A0A446WER6	A0A287UAM7;A0A446VGP1;A0A446VGX9;A0A3B6QFG6;A0A446WEZ9;A0A446WET4;A0A446VGT6;A0A446VGZ0;A0A287UAN6;M8B120;F2D1J8;A0A446VGX1;A0A287UAS4;A0A1D6B2M0;A0A446WER6	82
24.0574264526367	23.970365524292	22.0144920349121	24.3572883605957	24.34889793396	22.8923473358154	23.1259231567383	22.7291698455811	22.2880668640137	2	2	2	9.2	9.2	9.2	43.836	0	11.73	12206000	25	1	A0A446W5A0;A0A446W583;A0A3B6PII1;A0A287TJ84;A0A3B6QBM8;A0A287TJB7;A0A446V785;M7ZRQ3;A0A446V795;A0A3B6NMR2;A0A3B6NKH9;A0A446W563;A0A446V734;A0A3B6PID5;A0A3B6NM78;A0A3B6QDH8;A0A446W5A3;A0A446V7B3;F2DQ10;A0A446W588;A0A446V742;A0A446V773;A0A446V710;A0A287TJ81;A0A446W5A2;A0A446W585;A0A446W5A4;A0A446W580;A0A446W584;A0A446W558;A0A446V748;A0A3B6NLY5;A0A287TJP3;A0A446W593;A0A287TJ98;A0A287TJA8;A0A287TJQ1;…	A0A446W5A0;A0A446W583;A0A3B6PII1;A0A287TJ84;A0A3B6QBM8;A0A287TJB7;A0A446V785;M7ZRQ3;A0A446V795;A0A3B6NMR2;A0A3B6NKH9;A0A446W563;A0A446V734;A0A3B6PID5;A0A3B6NM78;A0A3B6QDH8;A0A446W5A3;A0A446V7B3;F2DQ10;A0A446W588;A0A446V742;A0A446V773;A0A446V710;A0A287TJ81;A0A446W5A2;A0A446W585;A0A446W5A4;A0A446W580;A0A446W584;A0A446W558;A0A446V748;A0A3B6NLY5;A0A287TJP3;A0A446W593;A0A287TJ98;A0A287TJA8;A0A287TJQ1;…	162
23.0613861083984	22.6916275024414	23.6033573150635	24.03955078125	24.0084686279297	23.7709579467773	22.9947299957275	22.9268989562988	22.6393146514893	3	3	2	15.3	15.3	12.9	44.709	0	18.007	122430000	25	7	A0A3B6RC85;A0A446WZS1;A0A287VJQ3;A0A287VJQ2;A0A446RIG1;A0A3B6U010;M8APV9;A0A3B6U4U3;A0A3B6R8Q3;F2DEY7;A0A287VK33;A0A3B6TID0;A0A446RII7;A0A446WZW4;A0A446RID1	A0A3B6RC85;A0A446WZS1;A0A287VJQ3;A0A287VJQ2;A0A446RIG1;A0A3B6U010;M8APV9;A0A3B6U4U3;A0A3B6R8Q3;F2DEY7;A0A287VK33;A0A3B6TID0;A0A446RII7;A0A446WZW4;A0A446RID1	174
23.5012073516846	23.3278179168701	24.6115703582764	23.7820339202881	23.7437000274658	23.8041305541992	23.7002792358398	22.9067516326904	23.2436866760254	5	5	5	15.6	15.6	15.6	38.106	0	30.268	309740000	25	13	A0A3B5YSH7;M7Z0L4;F2D9Z5;A0A1D6BRH1;A0A3B6TMV5;A0A446XZ87;A0A446XZK3;A0A3B5XTY5;A0A287XZP2;A0A287XZM4;A0A3B6STX8;A0A3B5ZNE8;A0A446XZ56;A0A446YZB3;A0A287XZD0;A0A446YZC8;M7Z4H0;A0A287EKG7;A0A3B5Z2X7;A0A446K9T9;A0A446K9V2;A0A446JAM6;A0A3B5Y5A0;A0A3B6A1J5;A0A287XZ97	A0A3B5YSH7;M7Z0L4;F2D9Z5;A0A1D6BRH1;A0A3B6TMV5;A0A446XZ87;A0A446XZK3;A0A3B5XTY5;A0A287XZP2;A0A287XZM4;A0A3B6STX8;A0A3B5ZNE8;A0A446XZ56;A0A446YZB3;A0A287XZD0;A0A446YZC8	225
29.2146339416504	29.0234279632568	28.973611831665	28.9875831604004	29.0584011077881	29.0754871368408	28.4334850311279	28.5310726165771	28.7414321899414	15	15	2	54.9	54.9	14.7	37.746	0	94.934	12678000000	25	112	A0A446JLX6;A0A3B5YTY7	A0A446JLX6;A0A3B5YTY7	228
23.6265239715576	24.0781497955322	24.7275943756104	23.1676788330078	24.9612426757813	24.564302444458	24.3428764343262	23.0280723571777	22.7979736328125	8	8	5	43.9	43.9	30.9	29.691	0	48.663	455440000	25	26	A0A3B6EBZ6;A0A446N2W7;M7ZJH4;Q43470;A0A446N2X2;A0A446N2X6;A0A446N302;L0GDQ5;A0A446N2V8;A0A446N2Q5;A0A446N2S2;W5D4G1;A0A446N2T3;A0A446PCH0;A0A3B6FJV3;A0A446PCR7;A0A446N2R2;A0A341RNA0;A0A446PC04;A0A446PC05;A0A446N2R5;A0A446N2S4;A0A446N2T0;A0A446PBX4;A0A446PDX0;A0A446N2Z8;A0A446N2T1;A0A3B6FG29;A0A446PBW3;A0A446PCQ8;A0A446N2S1;A0A446N2Q8;A0A446PBZ9;A0A446PDV9;A0A446PCK4;A0A446PCA9;A0A446PC50;A0A446PB…	A0A3B6EBZ6;A0A446N2W7;M7ZJH4;Q43470;A0A446N2X2;A0A446N2X6;A0A446N302;L0GDQ5;A0A446N2V8;A0A446N2Q5;A0A446N2S2;W5D4G1;A0A446N2T3;A0A446PCH0;A0A3B6FJV3;A0A446PCR7;A0A446N2R2;A0A341RNA0;A0A446PC04;A0A446PC05;A0A446N2R5;A0A446N2S4;A0A446N2T0;A0A446PBX4;A0A446PDX0;A0A446N2Z8;A0A446N2T1;A0A3B6FG29;A0A446PBW3;A0A446PCQ8;A0A446N2S1;A0A446N2Q8;A0A446PBZ9;A0A446PDV9;A0A446PCK4;A0A446PCA9;A0A446PC50;A0A446PB…	277
22.8152236938477	24.2389087677002	25.8864860534668	25.7258033752441	23.3580551147461	24.0003318786621	23.660608291626	23.9962520599365	22.4577980041504	7	4	4	28.5	11.9	11.9	38.881	0	23.992	274920000	25	11	A0A3B6H6K7;A0A3B6ESH8;A0A446P632;A0A446P620;M8AA24;A0A077S7C3;A0A3B6H2L0;A0A080YU48;M8APQ8;A0A287MQ85;A0A446P5Y7;A0A446P5Y8;A0A446QH62;A0A3B6ESG4;Q42853;Q42854	A0A3B6H6K7;A0A3B6ESH8;A0A446P632;A0A446P620;M8AA24;A0A077S7C3	302
25.8849964141846	25.8987827301025	25.7836418151855	25.5173416137695	23.189151763916	25.4204692840576	23.1347198486328	24.1094169616699	23.5532608032227	7	7	4	13.7	13.7	7.9	64.811	0	41.934	352010000	25	19	A0A3B6HSG5;A0A3B6HQX9;A0A446QTF3;A0A287P6H5;A0A3B6ITJ5;M7ZMZ7;A0A446S6B5;A0A446S6G9;A0A446S6G7;A0A3B6IU95;A0A3B6JJ66;A0A446QTG7;F2DH57;A0A287P5E0;A0A3B6JJV6;A0A446QTF8;A0A446S6H1;A0A446QTE4;A0A446QTG2;A0A446QTF9;A0A446QTF1;A0A446S6G8;A0A446S6G5;A0A446S6H3;A0A446QTF7;A0A287P5E4;A0A287P594;A0A287P5N2;A0A287P5D9;A0A077RT78;A0A446PFD1;A0A446N5Z7;F2E626;A0A287KBA5;A0A3B6GS66;A0A3B6EBG0;A0A446KKX9;A0A4…	A0A3B6HSG5;A0A3B6HQX9;A0A446QTF3;A0A287P6H5;A0A3B6ITJ5;M7ZMZ7;A0A446S6B5;A0A446S6G9;A0A446S6G7;A0A3B6IU95;A0A3B6JJ66;A0A446QTG7;F2DH57;A0A287P5E0;A0A3B6JJV6;A0A446QTF8;A0A446S6H1;A0A446QTE4;A0A446QTG2;A0A446QTF9;A0A446QTF1;A0A446S6G8;A0A446S6G5;A0A446S6H3;A0A446QTF7	306
27.0838527679443	26.988151550293	26.9293117523193	27.7583084106445	27.9670829772949	27.8709125518799	28.4472675323486	28.3596782684326	28.8881778717041	13	13	0	48.8	48.8	0	32.582	0	78.326	4567100000	25	77	A0A446XNE1;A0A3B6RMH1;A0A446XNF7;A0A287X5L0;A0A287X5J9;A0A446XNE2;A0A446XNE5;A0A287X5R6	A0A446XNE1;A0A3B6RMH1;A0A446XNF7;A0A287X5L0;A0A287X5J9	442
28.3292007446289	28.902193069458	29.0620880126953	28.399133682251	28.9600276947021	28.4054775238037	27.5011196136475	27.5129947662354	27.9865798950195	10	8	8	47.5	40.1	40.1	36.527	0	48.957	5109100000	24	71	A0A446XIS5;A0A287WX66;C7C4X1;P26517;A0A446XIS1;A0A446YIA0;A0A287WX60;A0A287WX12;A0A446YI86;A0A3B6RKE1;A0A446XIT0;A0A446XIU7;A0A1B1V4R0;F2CUE9;A0A287WWZ9;A0A287WXA1;A0A446XIW8;A0A3B6RKE8;A0A287WX17;A0A446XJ60;A0A446YIE3;A0A446YIL1;A0A446YIN6;A0A446XIT3;A0A287WWY0;T1TEC9;A3RHQ9;A0A287WXA5;A0A446YIH6;Q6V785;A0A1B1V4Q3;A3RHR9;Q6V776;A3RHT3;A0A446XIV3;A0A446XIX2;M7ZRJ1;A0A287WX22;A0A446XIW2;A0A446YID8…	A0A446XIS5;A0A287WX66;C7C4X1;P26517;A0A446XIS1;A0A446YIA0;A0A287WX60;A0A287WX12;A0A446YI86;A0A3B6RKE1;A0A446XIT0;A0A446XIU7;A0A1B1V4R0;F2CUE9;A0A287WWZ9;A0A287WXA1;A0A446XIW8;A0A3B6RKE8;A0A287WX17;A0A446XJ60;A0A446YIE3;A0A446YIL1;A0A446YIN6;A0A446XIT3;A0A287WWY0;T1TEC9;A3RHQ9;A0A287WXA5;A0A446YIH6;Q6V785;A0A1B1V4Q3;A3RHR9;Q6V776;A3RHT3;A0A446XIV3;A0A446XIX2;M7ZRJ1;A0A287WX22;A0A446XIW2;A0A446YID8	58
22.8696212768555	24.7678661346436	24.0645904541016	22.7151489257813	23.5660934448242	23.8348045349121	22.1307067871094	23.1345386505127	23.2189712524414	3	3	3	18.6	18.6	18.6	30.687	0	19.211	44914000	24	3	M7ZZI0;A0A287IA97;A0A446L1Y3;A0A287IAA7;A0A446MB35;F2D483;A0A446MAY6;A0A446L203;A0A1D5UKZ4;A0A3B6AYT7;A0A3B6C6G0;A0A287IAC0;A0A446L1U0;A0A446MB54;A0A287IA89;A0A287IAD3;A0A3B6C8R6;A0A446L1R6;A0A446MB86;A0A446MB61;A0A3B6C6D9;O23985	M7ZZI0;A0A287IA97;A0A446L1Y3;A0A287IAA7;A0A446MB35;F2D483;A0A446MAY6;A0A446L203;A0A1D5UKZ4;A0A3B6AYT7;A0A3B6C6G0;A0A287IAC0;A0A446L1U0;A0A446MB54;A0A287IA89;A0A287IAD3;A0A3B6C8R6;A0A446L1R6;A0A446MB86;A0A446MB61;A0A3B6C6D9;O23985	63
28.6403770446777	28.39284324646	28.3115100860596	28.4244632720947	27.7010097503662	27.8291721343994	27.5031700134277	23.7349090576172	23.1011714935303	12	12	2	46.4	46.4	8.7	38.908	0	70.655	5201200000	24	51	A0A1D5VD11;M7ZAX1;A0A446NXD6;A0A2P1E8S5;A0A3B6GZP8;A0A287M5E0;M0UTD1;M7ZYB3;A0A446Q7I2;A0A446Q7H8;A0A287M5C2;A0A287M5E8;A0A1D5YVC6;A0A3B6K9D1;A0A446Q7E7	A0A1D5VD11;M7ZAX1;A0A446NXD6;A0A2P1E8S5;A0A3B6GZP8;A0A287M5E0;M0UTD1;M7ZYB3	74
23.4435443878174	23.8939304351807	23.0710258483887	23.3316230773926	23.3108692169189	22.9540119171143	23.0240631103516	23.3793029785156	23.477746963501	11	2	2	43.3	12	12	38.81	0	11.795	1153400000	24	0	A0A1D5VE13;A0A446NX84;M7ZGS6;A0A446NXK0;A0A3B6FUA0;A0A446NXJ6;A0A446NX67;A0A287M5E2;W5D5L4;F2CXT7;A0A1D5WIS4;A0A1D5WMF1;A0A446Q7F0;A0A446NXC7;C1J959;C1J960;A0A1D5ZGE0;Q8VWM9;A0A287M5C8	A0A1D5VE13;A0A446NX84;M7ZGS6;A0A446NXK0;A0A3B6FUA0;A0A446NXJ6;A0A446NX67;A0A287M5E2;W5D5L4;F2CXT7;A0A1D5WIS4;A0A1D5WMF1;A0A446Q7F0;A0A446NXC7;C1J959;C1J960;A0A1D5ZGE0	75
22.9716091156006	23.5214767456055	23.5941295623779	22.7158203125	23.499340057373	22.121208190918	23.9808502197266	24.2656364440918	24.3814601898193	4	4	4	16.2	16.2	16.2	41.097	0	23.981	229040000	24	16	M7YVT8;A0A287HPZ3;A0A287HPZ9;A0A3B6FPZ0;A0A446PZ35;A0A287HPN8;M7ZS81;W5C3H4;A0A287HPP4;A0A446NPF1;A0A287HPP5;A0A3B6GZ59;A0A3B6FTT8;A0A446PYI4;A0A446NP01;A0A446PYI3;A0A446M3M4;A0A287LHW4;A0A287LHY6;A0A287HPN9;A0A287LHW1;A0A287LHW8;A0A287LHX0;A0A446NNS6;A0A3B6FQH4;A0A446PZ31;A0A446PYU3;A0A287LHU8;A0A287LHW2;A0A287HPZ6;A0A287LHU4	M7YVT8;A0A287HPZ3;A0A287HPZ9;A0A3B6FPZ0;A0A446PZ35;A0A287HPN8;M7ZS81;W5C3H4;A0A287HPP4;A0A446NPF1;A0A287HPP5;A0A3B6GZ59;A0A3B6FTT8;A0A446PYI4;A0A446NP01;A0A446PYI3;A0A446M3M4;A0A287LHW4;A0A287LHY6;A0A287HPN9;A0A287LHW1;A0A287LHW8;A0A287LHX0;A0A446NNS6;A0A3B6FQH4;A0A446PZ31;A0A446PYU3	114
23.1116142272949	23.1503524780273	22.9029083251953	22.5457992553711	23.4408588409424	23.0959339141846	23.406608581543	23.4015102386475	22.7481346130371	3	3	3	11.9	11.9	11.9	39.192	0	18.229	63395000	24	2	A0A2X0S675;A0A446L2M9;A0A446L2G8;A0A287IBX2;A0A287IBT0;A0A446L2P7;A0A287IBR3;A0A287IBX7;A0A446L2E2;A0A3B6AZ17;F2CTI3;M7ZE17;A0A446MBS7;A0A446MBL0;A0A3B6C8Z4;A0A446MBT3;A0A3B6C6L6;A0A3B6C6N1;A0A446MBH6;A0A446MBP3;A0A446MBL3;A0A446MBH9	A0A2X0S675;A0A446L2M9;A0A446L2G8;A0A287IBX2;A0A287IBT0;A0A446L2P7;A0A287IBR3;A0A287IBX7;A0A446L2E2;A0A3B6AZ17;F2CTI3;M7ZE17	115
22.2124423980713	23.8599090576172	25.130033493042	23.495475769043	23.4134311676025	23.5569744110107	22.2743797302246	23.304048538208	24.110408782959	2	2	2	8.3	8.3	8.3	38.882	0	12.921	75157000	24	8	A0A446LIY1;A0A3B6B5P1;T1M2W9;A0A446LIQ9;Q9ZR34;M0XUK9;A0A7H4LNY5;A0A446MSG5;A0A3B6CEE9;F2D1H6;A0A0U2GJM5;A0A446MSE7	A0A446LIY1;A0A3B6B5P1;T1M2W9;A0A446LIQ9;Q9ZR34;M0XUK9;A0A7H4LNY5;A0A446MSG5;A0A3B6CEE9;F2D1H6;A0A0U2GJM5;A0A446MSE7	261
22.8057250976563	23.5595550537109	23.1338443756104	22.4177417755127	23.2583560943604	22.906909942627	23.0669441223145	22.933666229248	24.0050506591797	3	3	3	16.2	16.2	16.2	29.454	0	18.154	33980000	24	3	A0A3B6HRX3;A0A446QXS7;A0A446QXQ7;A0A446QXR5;A0A446QXL2;A0A446S2B2;A0A3B6IQI9;A0A446QXM3;A0A3B6HU75;Q9FXQ9;A1X810;A0A446S2G5;A0A3B6JGP3;A0A287NVR9;A0A446QXR0;A0A446S2C9;A0A287NVY7;A0A446QXJ8;A0A446QXR1;A0A287NQG3;A0A341U209;A0A3B6JJG4;A0A446S2B1;M7YZW6;A0A287NVQ0;A1X809	A0A3B6HRX3;A0A446QXS7;A0A446QXQ7;A0A446QXR5;A0A446QXL2;A0A446S2B2;A0A3B6IQI9;A0A446QXM3;A0A3B6HU75;Q9FXQ9;A1X810;A0A446S2G5;A0A3B6JGP3;A0A287NVR9;A0A446QXR0;A0A446S2C9;A0A287NVY7;A0A446QXJ8;A0A446QXR1;A0A287NQG3	309
23.5866413116455	24.4638900756836	22.7849540710449	22.9752159118652	23.2759971618652	23.0729293823242	23.7045879364014	23.6230068206787	22.6925430297852	11	1	1	43.3	5.6	5.6	38.895	0	6.8609	43435000	24	1	A0A446Q7F7;W5D0E3;A0A446Q7L3	A0A446Q7F7;W5D0E3;A0A446Q7L3	499
23.6349773406982	23.651029586792	22.5757312774658	23.1415576934814	23.4872798919678	23.5943431854248	23.8683109283447	23.1187572479248	24.329626083374	3	3	3	9.8	9.8	9.8	41.945	0	17.562	56472000	23	2	M7Z596;A0A446VT55;A0A446VT38;A0A075J4P9;F2DWS1;A0A446WR23;A0A446VT64;W5B985;A0A446MI88;A0A3B6QML7;A0A3B6PT03;A0A3B6NW91;M8AEH2;A0A446L937;A0A3B6NX41;A0A446VT41;A0A446L903;A0A287FVX9;A0A287FZQ1;A0A287FVY7;A0A287HK94;A0A287FZQ3;A0A287HK50;A0A287RT40;A0A287RSS1;A0A287WPF1;A0A287EAB6;A0A446WR16	M7Z596;A0A446VT55;A0A446VT38;A0A075J4P9;F2DWS1;A0A446WR23;A0A446VT64;W5B985;A0A446MI88;A0A3B6QML7;A0A3B6PT03;A0A3B6NW91;M8AEH2;A0A446L937;A0A3B6NX41;A0A446VT41	8
23.8078937530518	23.6683464050293	23.0721530914307	22.3998031616211	23.3252906799316	23.1528415679932	22.1199893951416	24.5033111572266	21.1389865875244	2	2	2	8.8	8.8	8.8	45.573	0	11.657	55322000	23	1	M7YN42;A0A287Q8X5;A0A446SMY7;F2CRR8;F2DFP8;F2DBQ9;A0A446TTI4;M0XP26;A0A287Q9L4;A0A3B6LFR2;A0A3B6KAS9;A0A287Q8Y1;A0A287Q8Y9;A0A446SMZ0;A0A287Q8X3;A0A287Q9L9;A0A287Q8W5;A0A287Q8Y5;A0A287Q993;A0A287Q9M4;A0A3B6K9P7	M7YN42;A0A287Q8X5;A0A446SMY7;F2CRR8;F2DFP8;F2DBQ9;A0A446TTI4;M0XP26;A0A287Q9L4;A0A3B6LFR2;A0A3B6KAS9;A0A287Q8Y1;A0A287Q8Y9;A0A446SMZ0;A0A287Q8X3;A0A287Q9L9;A0A287Q8W5;A0A287Q8Y5;A0A287Q993;A0A287Q9M4;A0A3B6K9P7	143
23.4555740356445	23.7705860137939	23.4331245422363	23.4229507446289	23.0783157348633	22.6218814849854	22.5784435272217	23.7705230712891	23.6853351593018	2	2	2	8.4	8.4	8.4	27.167	0	11.939	25023000	23	5	W5G0E6;F2DYJ0;A0A446UF89;A0A287RV58;A0A287RVD4;A0A446T7Z1;A0A446UF97;A0A287DU53;W5AEN0;M0X5Y1;A0MMD3;A0A446K5D8	W5G0E6;F2DYJ0;A0A446UF89;A0A287RV58;A0A287RVD4;A0A446T7Z1;A0A446UF97;A0A287DU53;W5AEN0;M0X5Y1;A0MMD3;A0A446K5D8	153
27.5397872924805	27.2539482116699	23.4446105957031	27.4490013122559	27.6929206848145	27.3680305480957	23.2099685668945	26.4288940429688	22.8643131256104	9	8	3	36.2	34	13.6	41.802	0	47.414	2176800000	23	26	M8A2R3;A0A3B6AS74;A0A446KLT4;A0A3B6ARM3;A0A446KLY7;A0A446KLX1;A0A446KLX4;A0A446KLS7;A0A446LWV3;A0A446KLS8;A0A446KLT2;A0A446KLU7;A0A287H7K2;A0A7H4LCF5;A0A446LX25;A0A3B6C098;F2DWC8;I6V2S3;Q4U0C9;A0A287H7C5;A0A287H7A6;M7ZTW4	M8A2R3;A0A3B6AS74;A0A446KLT4;A0A3B6ARM3;A0A446KLY7;A0A446KLX1;A0A446KLX4;A0A446KLS7	247
23.8738613128662	23.0741634368896	22.9345226287842	23.5298194885254	23.0412845611572	24.0277233123779	22.9672737121582	22.8512516021729	23.778528213501	3	3	3	13.3	13.3	13.3	41.358	0	18.475	154340000	23	3	A0A446LM98;A0A3B6B7X7;M7YUM7;A0A446LMD6;A0A3B6B7E5;A0A446LM85;A0A3B6DML6;A0A446LM99;A0A7H4LQ88;A0A446LM92;A0A287JPU1;A0A287JPL0;A0A287JPG7;F2CR89;F2E8C5;A0A287JPU6;A0A446MW83;A0A287JPQ9;A0A446MWB4;A0A446MWH0;A0A446MX17;A0A446MW72;A0A3B6CG72;A0A446MWG0;F2D4X9;A0A287JPR4	A0A446LM98;A0A3B6B7X7;M7YUM7;A0A446LMD6;A0A3B6B7E5;A0A446LM85;A0A3B6DML6;A0A446LM99;A0A7H4LQ88;A0A446LM92;A0A287JPU1;A0A287JPL0;A0A287JPG7;F2CR89;F2E8C5;A0A287JPU6	263
22.7285995483398	25.5213317871094	22.6778182983398	23.6713180541992	23.0595874786377	25.3556499481201	23.3789825439453	23.0924167633057	23.6983757019043	6	6	1	21.1	21.1	2.6	41.049	0	37.154	349850000	23	20	A0A3B6IY47;A0A446SF45;A0A446SF41	A0A3B6IY47;A0A446SF45;A0A446SF41	348
23.6362953186035	22.5041446685791	23.2720623016357	23.7980575561523	23.7260627746582	23.6016597747803	23.0873737335205	22.9824314117432	23.2392482757568	3	3	3	12.2	12.2	12.2	43.342	0	17.601	104330000	23	3	A0A446USQ0;A0A446USP5;A0A3B6MZY8;A0A3B6LVS3;A0A3B6LVN8;M7YR33;A0A287SPH9;A0A287SPL7;A0A446TKA1;A0A3B6KSF3;M0VC03;A0A287SPH4;A0A446USN0;A0A3B6MYY3;A0A3B6LVT0;A0A287SPQ4	A0A446USQ0;A0A446USP5;A0A3B6MZY8;A0A3B6LVS3;A0A3B6LVN8;M7YR33	398
23.4508113861084	23.1770038604736	23.6747932434082	23.7770099639893	22.9671688079834	22.6012573242188	24.4048900604248	23.3468685150146	22.790506362915	2	2	2	10.5	10.5	10.5	35.402	0	12.875	159730000	23	12	A0A446VT02;A0A446WR31;A0A446VT24;A0A446WQZ4;A0A446VT39;A0A446VT16;A0A3B6PUE5;A0A3B6NX30;A0A446WR39;A0A446VT50;A0A446VSZ5;A0A3B6QNG6;A0A3B6QML0	A0A446VT02;A0A446WR31;A0A446VT24;A0A446WQZ4;A0A446VT39;A0A446VT16;A0A3B6PUE5;A0A3B6NX30;A0A446WR39;A0A446VT50;A0A446VSZ5;A0A3B6QNG6;A0A3B6QML0	417
24.2425632476807	24.0385875701904	24.0019588470459	24.7859630584717	23.6591625213623	22.6678943634033	23.4814491271973	22.7699356079102	23.5987186431885	4	4	1	14.8	14.8	3.3	33.289	0	23.492	239340000	23	24	Q4W6G2;A0A446W2C0;A0A3B6PFH8;A0A287HUJ4;F2E4J5;D3JUT3;A0A3B6TZ07;A0A287HUJ1;M7ZXM8;A0A446V4B8;A0A3B6TZ03;T1MST3;A0A287HUK0;A0A446S0H7;A0A446S0I4	Q4W6G2;A0A446W2C0;A0A3B6PFH8;A0A287HUJ4;F2E4J5;D3JUT3;A0A3B6TZ07;A0A287HUJ1;M7ZXM8;A0A446V4B8;A0A3B6TZ03	419
23.4794330596924	23.418212890625	24.2101020812988	23.2202987670898	24.2569026947021	22.37034034729	24.3754501342773	24.0790214538574	21.8907566070557	1	1	1	4.5	4.5	4.5	30.982	0	7.2109	0	23	1	F2DPN4;A7L5U8;A7L5U7;M8A4N0;A0A446XSG6;A0A3B6RL15;A0A3B6SHQ0	F2DPN4;A7L5U8;A7L5U7;M8A4N0;A0A446XSG6;A0A3B6RL15;A0A3B6SHQ0	439
23.6032066345215	21.935676574707	23.1130123138428	24.6229419708252	23.8602733612061	23.0657958984375	22.8649444580078	23.0289325714111	23.2259521484375	11	3	1	35.4	13.3	3.8	43.118	0	19.506	264070000	23	32	Q41593;A0A446UJS1;A0A446UJS8;A0A3B6LS85;M1MQ64	Q41593;A0A446UJS1;A0A446UJS8;A0A3B6LS85	586
23.3192005157471	23.8082332611084	23.4222545623779	23.1528568267822	23.2510528564453	24.7878646850586	23.3412246704102	22.7569808959961	22.2828483581543	2	2	2	10	10	10	26.001	0	12.103	75123000	22	2	F2DDU3;A0A446UAA3;A0A3B6MRX0;A0A3B6LM62;M8A2Q5;A0A3B6KG21;A0A446UA79;A0A3B6KIM0;A0A287RH41;A0A3B6LMA2	F2DDU3;A0A446UAA3;A0A3B6MRX0;A0A3B6LM62;M8A2Q5;A0A3B6KG21;A0A446UA79;A0A3B6KIM0;A0A287RH41;A0A3B6LMA2	359
25.699197769165	25.7731895446777	25.6298141479492	25.2174510955811	25.4080142974854	25.4577941894531	24.3653964996338	23.5065860748291	23.7627811431885	5	5	5	27.6	27.6	27.6	31.316	0	30.698	649600000	22	42	A0A3B6LWL0;A0A3B6N2D1;A0A446UU34;A0A3B6LWG8;A0A446UUU9;A0A3B6KSP7;M0VI12;A0A446UU60;A0A446UU44;A0A287SSN3;A0A287SSF6;A0A287SSM8;M0VI13;A0A287SSN8;A0A287SSK0;A0A287SSI3;A0A287SSK5	A0A3B6LWL0;A0A3B6N2D1;A0A446UU34;A0A3B6LWG8;A0A446UUU9;A0A3B6KSP7;M0VI12;A0A446UU60;A0A446UU44;A0A287SSN3	399
27.1536388397217	27.0662002563477	26.9225234985352	26.6951122283936	26.8368949890137	26.6226844787598	26.0435180664063	26.1448192596436	26.1160678863525	10	10	5	56.5	56.5	34.7	27.715	0	60.954	1902100000	21	48	A0A446PYM8;A0A3B6GTM0;A0A077S347;F2EBF9;A0A287LL05;A0A287LL23;F2DUR3	A0A446PYM8;A0A3B6GTM0;A0A077S347;F2EBF9;A0A287LL05	25
24.4911327362061	23.143087387085	22.983003616333	22.8922290802002	23.7501029968262	22.1445808410645	23.0881404876709	23.7966251373291	22.011697769165	4	4	4	23.5	23.5	23.5	32.824	0	25.162	58208000	21	8	M7XM40;A0A3B6RP85;A0A0H4M116;A0A3B6SLN2;A0A0H4MC33;A0A3B6RQ09;M8A9J7;A0A287Y1S6;A0A287Y1H8;A0A287Y1L8;P55307;P55313;F2CPL2;A0A0H4LXI0;A0A3B6U183;A0A287Y1W9;A0A287Y1R0;F2CWC7;Q71VA1;C4WYH8;A0A446XZD2;A0A446XZB7;A0A446YZH3;A0A287Y1M3;A0A446XZH7;A0A287Y1I3;A0A446XZT6;A0A0H4LXI7;A0A3B6KQP3;A0A3B6JQL2;A0A0E3X9I9;A0A3B6JMX0;A0A4D6DIV2;Q43206;A0A287PV21;F2D0X6;T1N7Q8;A0A287PV31;I0AW31;A0A446SGM0;A0A446S…	M7XM40;A0A3B6RP85;A0A0H4M116;A0A3B6SLN2;A0A0H4MC33;A0A3B6RQ09;M8A9J7;A0A287Y1S6;A0A287Y1H8;A0A287Y1L8;P55307;P55313;F2CPL2;A0A0H4LXI0;A0A3B6U183;A0A287Y1W9;A0A287Y1R0;F2CWC7;Q71VA1;C4WYH8;A0A446XZD2;A0A446XZB7;A0A446YZH3;A0A287Y1M3;A0A446XZH7;A0A287Y1I3;A0A446XZT6;A0A0H4LXI7	44
23.0326080322266	24.1647167205811	24.69557762146	24.004976272583	23.0864391326904	22.1899871826172	23.7105121612549	23.6822814941406	23.9970550537109	4	4	4	16.5	16.5	16.5	31.913	0	25.485	90046000	21	9	A0A287RUX0;A0A287RUX5;A0A1D5Z340;F2DE13;A0A287RV59;A0A446T845;A0A287RV73;A0A287RV90;A0A287RVE7;A0A3B6TIY0;A0A3B6SID4;A0A446T821;A0A446XDU9;A0A446YD89;M0VKS2;A0A287RV85;A0A287WJT2;A0A287WJX9;M7Z1M6;A0A3B6RED0;A0A287RV78;A0A446YDI7;A0A3B6TE78;A0A287RVE3;M7Z930;A0A446UFA7;A0A287WJT9;A0A446XDU1;A0A446YD92;A0A287WJT3;A0A287WK47;A0A446YDH5;A0A446XDT1;A0A287WJT7	A0A287RUX0;A0A287RUX5;A0A1D5Z340;F2DE13;A0A287RV59;A0A446T845;A0A287RV73;A0A287RV90;A0A287RVE7;A0A3B6TIY0;A0A3B6SID4;A0A446T821;A0A446XDU9;A0A446YD89;M0VKS2;A0A287RV85;A0A287WJT2;A0A287WJX9;M7Z1M6;A0A3B6RED0;A0A287RV78;A0A446YDI7;A0A3B6TE78;A0A287RVE3;M7Z930;A0A446UFA7;A0A287WJT9;A0A446XDU1;A0A446YD92	79
27.8600578308105	28.406774520874	23.6596527099609	27.7985992431641	26.6109085083008	28.0162715911865	22.7061004638672	23.2025508880615	23.3692626953125	10	10	10	34.8	34.8	34.8	35.475	0	60.926	3288100000	21	20	A0A3B5ZSR0;A3KLL4;C3VNF1;A0A287F9I4;F2D4W6;A0A287F9I3;A0A287F9I9;A0A287F9I6;A0A446IU88;A0A446IU09;A0A446IU16;T1NAD0;A0A3B5XY18;M0Z0D3;A0A287F9I8;A0A446IU25;A0A446JTK4;A0A287F9I2;Q6XEB8	A0A3B5ZSR0;A3KLL4;C3VNF1;A0A287F9I4;F2D4W6;A0A287F9I3;A0A287F9I9;A0A287F9I6;A0A446IU88;A0A446IU09;A0A446IU16;T1NAD0;A0A3B5XY18;M0Z0D3;A0A287F9I8;A0A446IU25;A0A446JTK4;A0A287F9I2;Q6XEB8	102
23.204776763916	23.6063671112061	23.7357158660889	23.6881446838379	23.3406391143799	24.3293132781982	22.597318649292	23.3359661102295	23.0509223937988	2	2	2	7.4	7.4	7.4	31.239	0	12.191	34531000	21	4	F2E3V3;F2D2I7;A0A287ULF4;A0A3B6QHC3;A0A3B6PPJ9;A0A287UL22;M7Z7V2;A0A446WJ65;A0A287UL32;A0A3B6NRD3;A0A446VLG6	F2E3V3;F2D2I7;A0A287ULF4;A0A3B6QHC3;A0A3B6PPJ9;A0A287UL22;M7Z7V2;A0A446WJ65;A0A287UL32;A0A3B6NRD3;A0A446VLG6	166
23.0137405395508	23.5668640136719	23.8285007476807	22.8036727905273	24.4998531341553	22.7505779266357	22.6259899139404	22.9300136566162	22.6629791259766	4	1	1	22.6	13.5	13.5	35.526	0	6.7764	30336000	21	4	A0A446JDI9;A0A3B5Y7Z1;A0A446JDG6;A0A446JDZ5;A0A446JDE8;A0A287GPB7;A0A446JDH2;A0A3B5Y6M5	A0A446JDI9;A0A3B5Y7Z1;A0A446JDG6;A0A446JDZ5;A0A446JDE8;A0A287GPB7;A0A446JDH2;A0A3B5Y6M5	218
23.3373432159424	23.2586002349854	23.7593078613281	23.3819770812988	22.8526859283447	23.3677997589111	22.5818119049072	22.9544525146484	23.5838260650635	7	2	2	27.8	6	6	27.843	0	11.911	5341700	21	1	A0A446NMP0;A0A3B6EIX7	A0A446NMP0;A0A3B6EIX7	287
25.972526550293	26.0923271179199	25.9459247589111	25.8566665649414	25.8167762756348	26.090087890625	23.1040573120117	23.2213096618652	22.7381057739258	5	5	3	11.2	11.2	6.8	42.229	0	30.228	867290000	21	31	A0A446QDY2;Q53IQ4;A0A3B6G0M2;A7UME2;A7UME1;A7UME6;A0A446QDY4;A0A446P382;A0A446P341;Q5TLZ0;Q53IQ2;A0A287GMT2;Q53IQ3;A0A3B6ER07;Q5TMB2;M7ZXF5;S0F0Q8;F2D8C2;F2D3W3;A0A287MHV1;Q6KE44;A0A3B6H0X4;A0A287MHV2	A0A446QDY2;Q53IQ4;A0A3B6G0M2;A7UME2;A7UME1;A7UME6;A0A446QDY4	297
22.9418258666992	22.832347869873	23.8726463317871	23.0177841186523	23.0862808227539	22.7645454406738	22.9783210754395	23.4057788848877	24.2175960540771	1	1	1	4.8	4.8	4.8	42.363	0	6.6163	0	21	1	A0A3B6TJA3;A0A446X1J4;A0A3B6RD24;A0A446X1D6;A0A446RGS4;A0A446X1K2;A0A446RGP2;A0A3B6TKG4;A0A3B6I120;A0A3B6R922;M7ZTA3;A0A446X1J1	A0A3B6TJA3;A0A446X1J4;A0A3B6RD24;A0A446X1D6;A0A446RGS4;A0A446X1K2;A0A446RGP2;A0A3B6TKG4;A0A3B6I120;A0A3B6R922;M7ZTA3;A0A446X1J1	325
24.5797004699707	22.7530708312988	23.3326835632324	23.4805774688721	23.7591114044189	24.439868927002	22.7541694641113	23.3841781616211	22.3575744628906	3	3	3	12.6	12.6	12.6	34.479	0	17.422	83033000	21	5	A0A3B6LSN0;A0A446TDE1;A0A3B6KP24;A0A446TDF0;A0A446UKQ5;A0A3B6LRC5;A0A446TDD7;A0A446UKQ3;M8AGZ2;A0A3B6KM64;A0A287S943;A0A287S948;A0A287S983;A0A287S913;A0A287S902;A0A287S8Z2;F2D1P1;A0A446L3W7;A0A446UKT1;A0A287IFK7;M7Z526;A0A446L3S2;A0A3B6DD91;A0A446MD28;A0A446MCT4;A0A446L418;A0A446L3R5;A0A3B6DE43;A0A3B6AZ34;A0A287IFP0;A0A3B6C9H0;A0A287IFQ4;A0A446TDD2;W5BZZ2;G9HXG9;A0A3B6C759;A0A287IFP9	A0A3B6LSN0;A0A446TDE1;A0A3B6KP24;A0A446TDF0;A0A446UKQ5;A0A3B6LRC5;A0A446TDD7;A0A446UKQ3;M8AGZ2;A0A3B6KM64;A0A287S943;A0A287S948;A0A287S983;A0A287S913;A0A287S902;A0A287S8Z2	366
22.70827293396	23.2556705474854	22.9770584106445	23.1254348754883	23.7550964355469	23.6053524017334	23.0191879272461	23.473295211792	22.6118698120117	2	2	2	10.3	10.3	10.3	52.044	0	12.118	56970000	21	8	A0A3B6LUD2;A0A446UPB2;A0A3B6MZ83	A0A3B6LUD2;A0A446UPB2;A0A3B6MZ83	391
24.5321960449219	23.2708873748779	22.6479644775391	24.7311744689941	23.1414375305176	22.5096473693848	23.3966083526611	22.7464485168457	24.2283535003662	4	4	4	20.2	20.2	20.2	35.674	0	24.091	176060000	21	10	A0A446YA69;A0A3B6SH12;A0A446YA89;A0A3B6TPP4;A0A3B6RH14;A0A446XAR4;M7YX99;A0A446XAJ1;A0A446XAL3;M7ZT23;A0A446YA80;A0A3B6THU0;A0A446YAC5;A0A3B6SF22;A0A3B6RD04;A0A3B6SJS2	A0A446YA69;A0A3B6SH12;A0A446YA89;A0A3B6TPP4;A0A3B6RH14;A0A446XAR4	447
23.2985038757324	23.6392860412598	22.7389373779297	22.2548980712891	22.7468318939209	22.9154472351074	24.2245903015137	22.6674423217773	24.2001247406006	4	2	2	13.2	8.7	8.7	40.934	0	11.907	181890000	21	0	Q8H0K8;A0A446QDW8	Q8H0K8;A0A446QDW8	502
25.039758682251	22.9334449768066	25.3960075378418	25.5129203796387	26.0085983276367	26.0693588256836	22.5560092926025	23.4154605865479	22.6861972808838	11	2	2	44.7	12.6	12.6	43.31	0	12.36	389230000	21	19	A0A446UPC8	A0A446UPC8	521
28.6296138763428	28.0324935913086	28.2838764190674	28.4367446899414	28.5955181121826	28.6759986877441	28.2558841705322	21.9876117706299	23.7879371643066	11	8	1	45.5	39.9	9.8	43.311	0	53.233	4957200000	21	76	Q9ST57	Q9ST57	594
23.3166084289551	23.1452922821045	23.8703746795654	22.3802757263184	22.7958526611328	23.088020324707	24.1417427062988	22.9110946655273	22.9195747375488	3	3	3	15.7	15.7	15.7	36.478	0	18.176	28231000	20	6	A0A446UBL1;A0A446T4D5;A0A446UBN6;M7ZL95;A0A446UBL4;A0A446T4F0;D8L9B5;D8L9B4;D8L9A5;A0A446UBM5;A0A446T4I1;A0A3B6MSX0;A0A3B6KGR6;A0A024FRN8;F2CPT7;A0A287RLW1	A0A446UBL1;A0A446T4D5;A0A446UBN6;M7ZL95;A0A446UBL4;A0A446T4F0;D8L9B5;D8L9B4;D8L9A5;A0A446UBM5;A0A446T4I1;A0A3B6MSX0;A0A3B6KGR6;A0A024FRN8;F2CPT7;A0A287RLW1	3
22.9425716400146	23.5739459991455	24.0823097229004	23.4549827575684	23.1300735473633	23.845100402832	23.4325542449951	22.7010402679443	22.1606330871582	2	2	2	9.4	9.4	9.4	36.418	0	12.058	80477000	20	2	A0A446PVX2;A0A068AZ53;A0A287LG02;A0A3B6FNK4;A0A3B6GXV4;A0A446PVQ9;A0A287LG06;A0A3B6GXC7;W5CUZ3;A0A446PVR8;A0A446PVP5;A0A446PVS6;A0A446NKR2;A0A446NKP9;A0A446NKS2;A0A068AZX3;A0A068B052;A0A068B111;A0A446NKG9;A0A446NKK1;A0A3B6EH94;A0A3B6EJ95;A0A446NKM3;A0A446NKK9;M7YH26	A0A446PVX2;A0A068AZ53;A0A287LG02;A0A3B6FNK4;A0A3B6GXV4;A0A446PVQ9;A0A287LG06;A0A3B6GXC7;W5CUZ3;A0A446PVR8;A0A446PVP5;A0A446PVS6;A0A446NKR2;A0A446NKP9;A0A446NKS2;A0A068AZX3;A0A068B052;A0A068B111;A0A446NKG9;A0A446NKK1;A0A3B6EH94;A0A3B6EJ95;A0A446NKM3;A0A446NKK9;M7YH26	6
29.1077423095703	23.6401920318604	22.9970264434814	28.5959091186523	25.9879360198975	29.3323841094971	30.8174934387207	30.4058837890625	30.6545467376709	20	20	6	72.8	72.8	21	23.224	0	126.08	10785000000	20	70	A0A0M5JZA8;A0A3B5Y545;A0A3B5Y548;Q8GV49;A0A446JA94;M7Z3D7;Q03968	A0A0M5JZA8;A0A3B5Y545;A0A3B5Y548;Q8GV49;A0A446JA94;M7Z3D7;Q03968	50
23.5746822357178	24.5973644256592	23.283878326416	23.621919631958	22.2076873779297	22.8195190429688	24.0038452148438	24.4384632110596	22.8730506896973	4	3	2	23.1	17.4	13.5	29.972	0	25.186	129070000	20	2	P22244;A0A287SRS7;P04399;A0A287WKE2;B5TWK6;A0A287SRP7	P22244;A0A287SRS7;P04399;A0A287WKE2;B5TWK6;A0A287SRP7	156
23.8611660003662	22.9388160705566	22.3907108306885	22.6623096466064	23.5116157531738	23.3319034576416	23.6231269836426	22.0355110168457	22.4287586212158	2	2	2	4.4	4.4	4.4	58.369	0	11.732	39018000	20	2	A0A3B5XZQ6;A0A446IYK1;A0A3B5XZZ7;A0A446IYL4;A0A446IYL7;A0A446IYM8;A0A446IYM0;A0A3B5XZQ7;C7AE89;A0A446IYL3;A0A287FKG6;A0A3B5YXG7;A0A3B5ZUM9;A0A446JXI4;A0A446JXE9;A0A3B5ZVT1;A0A287FKH4;M8A5M1;A0A287FKH9;A0A3B5YX53;A0A446JXE1;C7AE90;A0A287FKE7;A0A446JXG6;A0A287FKJ0;A0A287FKI5;A0A3B5YYG8;A0A446IYL1;A0A446JXE2;A0A287FKI4;A0A287FKF3;A0A287FKJ5;A0A287FKF2;A0A899IGT4;A0A287FKE2;A0A287FKF6;A0A446JXF5;A0A3…	A0A3B5XZQ6;A0A446IYK1;A0A3B5XZZ7;A0A446IYL4;A0A446IYL7;A0A446IYM8;A0A446IYM0;A0A3B5XZQ7;C7AE89;A0A446IYL3;A0A287FKG6;A0A3B5YXG7;A0A3B5ZUM9;A0A446JXI4;A0A446JXE9;A0A3B5ZVT1;A0A287FKH4;M8A5M1;A0A287FKH9;A0A3B5YX53;A0A446JXE1;C7AE90;A0A287FKE7;A0A446JXG6;A0A287FKJ0;A0A287FKI5;A0A3B5YYG8;A0A446IYL1;A0A446JXE2;A0A287FKI4;A0A287FKF3;A0A287FKJ5;A0A287FKF2;A0A899IGT4;A0A287FKE2;A0A287FKF6;A0A446JXF5;A0A3…	201
23.4446239471436	24.3659152984619	23.4723777770996	23.7965335845947	23.7960968017578	22.3710880279541	23.8389511108398	24.1816806793213	22.4667091369629	13	2	0	53.2	12.3	0	22.708	0	12.511	0	20	0	A0A3B5ZZP8	A0A3B5ZZP8	244
24.3251190185547	22.9988098144531	23.7940063476563	22.660852432251	22.3572254180908	22.3786773681641	23.4134998321533	24.8652324676514	22.2206745147705	2	2	2	8.6	8.6	8.6	29.633	0	11.907	11232000	20	2	A0A3B6JFL3;A0A446RS41;M8A7A7;A0A446WZE4;A0A446RIM1;A0A446R857;A0A3B6R826;A0A3B6IMY5;A0A3B6I1B1;M7YF02;A0A3B6TJD4	A0A3B6JFL3;A0A446RS41;M8A7A7;A0A446WZE4;A0A446RIM1;A0A446R857;A0A3B6R826;A0A3B6IMY5;A0A3B6I1B1;M7YF02;A0A3B6TJD4	326
24.4006633758545	23.3717460632324	22.5190925598145	23.4543781280518	23.0431518554688	23.495885848999	23.7567615509033	24.320405960083	23.3786182403564	3	3	2	13.3	13.3	9.5	38.041	0	17.539	240100000	20	6	A0A3B6KLS3;M7Z2J3;A0A3B6MWE1;A0A287QP28;A0A446TYS7;A0A3B6MME7;A0A3B6LG78;M0WM50;A0A3B6AR72;A0A3B6KBJ8;A0A287QPD0;A0A446ST20;A0A3B6KME5;A0A446T960;A0A446TYV3;A0A287QPC5;A0A287QP50;A0A287QNQ0;M7Z0V0;M8AH18	A0A3B6KLS3;M7Z2J3;A0A3B6MWE1	365
24.0507793426514	23.7268867492676	23.1202964782715	24.131217956543	22.6558666229248	22.7661247253418	23.1035213470459	22.652156829834	24.0032787322998	10	4	1	29.9	14.1	3.3	43.138	0	23.453	2312300000	20	8	A0A446TH54;A0A3B6KQL2;M7Z1Z4;A0A446THC0;A0A446UPE7;A0A287SI55;Q9S8N4	A0A446TH54;A0A3B6KQL2;M7Z1Z4;A0A446THC0;A0A446UPE7	372
24.0158157348633	23.8022537231445	23.3663215637207	24.4631366729736	24.0680885314941	23.7529735565186	23.9438247680664	22.3439960479736	23.400218963623	4	4	4	16.4	16.4	16.4	24.469	0	23.856	164650000	20	18	A0A446VEY5;A0A446WCY8;W5GVR2;A0A3B6PJV0;A0A446VEX6;A0A287U1N2;A0A287U6D9;A0A3B6PN57;A0A287U6A1;A0A3B6QGX5;A0A287U1D7;A0A3B6PN63;A0A3B6QGW3;F2D0I7;F2DAK3;A0A446VE76;A0A446WCC0;A0A446VE74;A0A287U1D3;M7YMB7;A0A287U642;Q5I7L4	A0A446VEY5;A0A446WCY8;W5GVR2;A0A3B6PJV0;A0A446VEX6;A0A287U1N2;A0A287U6D9;A0A3B6PN57;A0A287U6A1;A0A3B6QGX5;A0A287U1D7;A0A3B6PN63;A0A3B6QGW3;F2D0I7;F2DAK3;A0A446VE76;A0A446WCC0;A0A446VE74;A0A287U1D3;M7YMB7;A0A287U642	420
29.2581787109375	28.701208114624	28.7720947265625	29.7996959686279	29.1669368743896	29.0249862670898	27.8500747680664	26.8870449066162	28.119909286499	9	9	3	36.5	36.5	8.6	38.929	0	60.408	11023000000	20	162	A0A3B6R8P8;Q40069;F2EEV5	A0A3B6R8P8	428
24.1987342834473	24.0492382049561	22.575382232666	24.232105255127	24.3346748352051	23.4713573455811	22.5433559417725	23.689884185791	23.1050109863281	2	2	2	9.7	9.7	9.7	32.448	0	12.367	199840000	20	14	A0A446KFB2;A0A6M3WHC7;A0A446KF85;A0A446KFF8;A0A446KFI1;A0A446KFC1;Q0Z9W3;A0A6M3WGV9;A0A3B6A2W3;M7YRH1	A0A446KFB2;A0A6M3WHC7;A0A446KF85;A0A446KFF8;A0A446KFI1;A0A446KFC1;Q0Z9W3;A0A6M3WGV9;A0A3B6A2W3;M7YRH1	481
23.6988716125488	22.4160575866699	23.0162010192871	23.8680648803711	22.2187099456787	23.5665550231934	24.1296844482422	23.7920665740967	22.3803749084473	9	4	1	44.4	18.6	5	38.797	0	30.316	1618300000	20	9	A0A446RIE1	A0A446RIE1	508
29.3001403808594	29.3476066589355	29.3347511291504	29.4607639312744	29.6122436523438	29.4456520080566	28.5096015930176	28.7688808441162	29.0442695617676	12	12	1	49.7	49.7	3.5	42.868	0	77.781	11802000000	20	109	M7ZQF1;A0A446TCB6;A0A446TC93;Q9ST58	M7ZQF1;A0A446TCB6;A0A446TC93;Q9ST58	515
27.2506980895996	26.9044914245605	27.0758190155029	26.7919101715088	27.1075916290283	26.7974872589111	21.9502983093262	22.194938659668	23.0586967468262	6	6	5	10	10	8.6	94.903	0	35.607	1224800000	20	20	B0L965;Q1LZV3;Q1LZV4;Q1LZV5;B0L966;D0IQ07;S4U1S9;X2JUA0;Q1KL96;P08489;D1MJA1;Q6R2V1;A0A0H4PMT1;P02861;M8A4Z7;E2CT66;A0A0K0KCV6;A0A059UHD1;A0A0X9ARV2;A0A411HB10;A0A0X9BZV4;A0A191UPA2;Q03872;A0A0X9BWB0;A9YSK4;P02862;S4U1T3;G3K725;S4U1S7;Q599I0;A0A1I9RW80;A0A2D0UFQ0;J7G6L4;G3FLC7;Q8GV12;A0A249Y2Y2;S4U290;S4U140;Q0Q5D2;C0SUC3;S4U5H5;S4U291;S4U492;P10388;S4U495;S4U5I0;S4U142;A0A5B9C2V1;Q19AE4;T2HRF3;A…	B0L965;Q1LZV3;Q1LZV4;Q1LZV5;B0L966	554
23.9663352966309	23.1491298675537	22.1977882385254	22.6115264892578	23.3786678314209	23.7982006072998	23.472354888916	23.4773445129395	22.9310340881348	2	2	2	13	13	13	28.23	0	11.695	35060000	19	1	F2DTT4;A0A287IG04;A0A3B6C702;A0A0C4BJ55;A0A3B6B0I4;A0A446MCS4;P80602;Q96468;A0A7S9YWD1;A0A287IG09;A0A287IFY2;A0A287IG49;A0A287IG14;A0A287IG35;A0A287IFZ1;A0A287IG43;A0A446L3T3;A0A3B6DER7;A0A287IFY7;A0A446L3Y1;A0A446MD02;A0A446L3U6;A0A287IG30	F2DTT4;A0A287IG04;A0A3B6C702;A0A0C4BJ55;A0A3B6B0I4;A0A446MCS4;P80602;Q96468;A0A7S9YWD1;A0A287IG09;A0A287IFY2;A0A287IG49;A0A287IG14;A0A287IG35;A0A287IFZ1;A0A287IG43;A0A446L3T3;A0A3B6DER7;A0A287IFY7;A0A446L3Y1;A0A446MD02;A0A446L3U6;A0A287IG30	34
23.8228569030762	23.4805717468262	24.5262432098389	23.0697956085205	23.2055568695068	23.7973690032959	22.7928428649902	22.7371559143066	22.7495040893555	8	3	3	42.9	17	17	21.748	0	17.944	453870000	19	9	B5TWD1;P14928;B5TWD0;A0A897Q2U1;A0A0E3Z898;B5TWC9;A0A6B9PG95;B5TWC8;F2D326	B5TWD1;P14928;B5TWD0;A0A897Q2U1;A0A0E3Z898;B5TWC9;A0A6B9PG95;B5TWC8;F2D326	39
23.867094039917	23.2117404937744	27.5628185272217	23.311429977417	22.7665843963623	28.01881980896	29.9366321563721	30.004638671875	23.4115009307861	7	7	7	33.8	33.8	33.8	21.485	0	42.604	6785900000	19	21	A0A1D5UB33;M7YQH9;REV__T1L6Y3;REV__A0A287VVI0	A0A1D5UB33	62
23.8171463012695	22.6070880889893	23.133674621582	23.7433948516846	23.3021450042725	23.5256938934326	23.6444149017334	22.9033088684082	22.8325004577637	3	3	2	13.3	13.3	7.3	32.412	0	17.925	247740000	19	8	A0A3B6HQ62;W5E2W7;A0A446SET7;A0A1W5RML9;M7ZI55;A0A287PR32;A0A446QJW0;A0A287PQY8;T1NTU6	A0A3B6HQ62;W5E2W7;A0A446SET7;A0A1W5RML9;M7ZI55;A0A287PR32;A0A446QJW0;A0A287PQY8	91
23.5658359527588	23.7318439483643	22.8835887908936	23.5951232910156	24.1790752410889	21.8896465301514	23.8005771636963	22.9313259124756	23.910400390625	2	2	2	12.9	12.9	12.9	27.336	0	11.68	22250000	19	1	A0A287FZ39;M0WVQ7;A0A287FZ45;A0A287FZ47;A0A287FZ34;F2DDM8;A0A287FZ49;A0A287FZ57;A0A287FZ40;M0WVQ5;A0A287FZ38;A0A287FZ50;A0A1D5SSE6;A0A446J315;M7ZMS3;A0A446J340;A0A446J396;A0A446K1S1;A0A1D5SSE7;A0A3B5Y1Q8;A0A446J3A2;A0A446K1Q7;A0A3B5Y225	A0A287FZ39;M0WVQ7;A0A287FZ45;A0A287FZ47;A0A287FZ34;F2DDM8;A0A287FZ49;A0A287FZ57;A0A287FZ40;M0WVQ5;A0A287FZ38;A0A287FZ50;A0A1D5SSE6;A0A446J315;M7ZMS3;A0A446J340;A0A446J396;A0A446K1S1;A0A1D5SSE7;A0A3B5Y1Q8;A0A446J3A2;A0A446K1Q7;A0A3B5Y225	106
24.5203437805176	22.6743984222412	24.265495300293	23.590015411377	23.9639987945557	23.2500629425049	24.0774345397949	22.7872161865234	23.6332035064697	2	2	2	11.5	11.5	11.5	26.144	0	11.735	46133000	19	3	A0A287FZ42;A0A287FZ46;A0A3B5ZW21;A0A446J318;A0A446J380;A0A3B5Y268;A0A446J341;F2E0S1;M7ZZT2;A0A446J337;A0A446J327;A0A3B5Y2U9;A0A3B5Z0F2;A0A3B5YZE8;A0A446K1P9;A0A446K1U5;A0A446K1V9;A0A446K1T8;A0A446K1V0	A0A287FZ42;A0A287FZ46;A0A3B5ZW21;A0A446J318;A0A446J380;A0A3B5Y268;A0A446J341;F2E0S1;M7ZZT2;A0A446J337;A0A446J327;A0A3B5Y2U9;A0A3B5Z0F2;A0A3B5YZE8;A0A446K1P9;A0A446K1U5;A0A446K1V9;A0A446K1T8;A0A446K1V0	107
23.4176368713379	24.2462863922119	23.0008659362793	22.6384315490723	23.9782104492188	23.0239963531494	23.6511363983154	23.8343410491943	22.8924598693848	2	2	2	12.9	12.9	12.9	22.467	0	12.126	29858000	19	4	A0A446YQN3;C0J025;A0A3B6TNQ8;W5H9B7;A0A446YQP9;F2D4W1;A0A287U593;M7YRY8;M0XII1;A0A446XR85;A0A3B6TIW9;C6ZGA7;Q2VCA1;Q2VCA0;C0J028;C0J026;A0A287XFB6;A0A287XFF1;A0A287U5I0;A0A446XR70;A0A287U5F0;A0A287U5F2;A0A287XF54;C0J027;Q7X7E8	A0A446YQN3;C0J025;A0A3B6TNQ8;W5H9B7;A0A446YQP9;F2D4W1;A0A287U593;M7YRY8;M0XII1;A0A446XR85;A0A3B6TIW9;C6ZGA7;Q2VCA1;Q2VCA0;C0J028;C0J026;A0A287XFB6;A0A287XFF1;A0A287U5I0;A0A446XR70;A0A287U5F0;A0A287U5F2;A0A287XF54;C0J027;Q7X7E8	163
23.5373592376709	23.3850517272949	23.7973175048828	24.2461071014404	23.0666217803955	22.656982421875	23.2320175170898	24.7291011810303	22.2065200805664	2	2	2	10.1	10.1	10.1	34.16	0	11.932	51764000	19	5	A0A446VKP4;A0A287UJF7;F2EEY9;A0A446WID0;A0A446VKP3;A0A3B6QH04;A0A3B6PQN7;A0A3B6NR27;A0A446WID3;A0A446VKS4;M7Z5S4;A0A446WIB7;A0A446VKV9;A0A3B6QGQ4;A0A3B6PP84;A0A287UJU1	A0A446VKP4;A0A287UJF7;F2EEY9;A0A446WID0;A0A446VKP3;A0A3B6QH04;A0A3B6PQN7;A0A3B6NR27;A0A446WID3;A0A446VKS4;M7Z5S4;A0A446WIB7;A0A446VKV9;A0A3B6QGQ4;A0A3B6PP84;A0A287UJU1	165
24.3773441314697	22.100040435791	22.1324558258057	22.6625728607178	23.0534687042236	23.1971817016602	22.7349224090576	22.8588047027588	23.6710720062256	2	2	2	8.5	8.5	8.5	46.408	0	11.58	45388000	19	0	A0A446RLH8;A0A446RLH7;A0A446RLG3;A0A3B6R6U9;A0A446RLH9;A0A446RLH6;A0A287VDB3;A0A3B6TGM9;F2D4S0;A0A287VDF9;A0A446RLH5;A0A446WWR5;A0A446WWQ9;A0A446RLG8;A0A446WWP6;A0A446RLH1;A0A446RLH2;A0A446RLH3;A0A446WWZ6;A0A3B6TI06;A0A446WWR1;A0A287VDC0;A0A446WWM2;A0A287VDG3;A0A3B6U4X7	A0A446RLH8;A0A446RLH7;A0A446RLG3;A0A3B6R6U9;A0A446RLH9;A0A446RLH6;A0A287VDB3;A0A3B6TGM9;F2D4S0;A0A287VDF9;A0A446RLH5;A0A446WWR5;A0A446WWQ9;A0A446RLG8;A0A446WWP6;A0A446RLH1;A0A446RLH2;A0A446RLH3;A0A446WWZ6;A0A3B6TI06;A0A446WWR1;A0A287VDC0;A0A446WWM2;A0A287VDG3;A0A3B6U4X7	173
23.8565711975098	24.0030708312988	23.1002578735352	23.8217830657959	22.9546489715576	23.4606781005859	24.2331771850586	22.8631572723389	23.3120155334473	2	2	1	6.7	6.7	3.2	36.394	0	11.672	44460000	19	4	A0A287WJZ7;A0A287WK02;F2CPR3;A0A446YDF2;A0A446XDV5;A0A3B6TJ01;A0A446YDB0;A0A287WKE0;A0A3B6REZ9;A0A446YDL5;A0A3B6SDN2;A0A446XDW1;A0A287WK23;A0A446XDU8;A0A446YDD1;A0A287WK58;A0A446XDT3;M8A797;A0A287WKD0;A0A287WK62;A0A3B6TQG1;A0A446YDA8;A0A446XDX2;A0A446YDJ9;A0A446XDW5;A0A287WKD5;A0A446T886;A0A446YDB7;A0A446UFE4;A0A287RVV7;A0A287RVJ5;A0A287RW18;A0A446UFG7;A0A446T880;M7ZKH8	A0A287WJZ7;A0A287WK02;F2CPR3;A0A446YDF2;A0A446XDV5;A0A3B6TJ01;A0A446YDB0;A0A287WKE0;A0A3B6REZ9;A0A446YDL5;A0A3B6SDN2;A0A446XDW1;A0A287WK23;A0A446XDU8;A0A446YDD1;A0A287WK58;A0A446XDT3;M8A797;A0A287WKD0;A0A287WK62;A0A3B6TQG1;A0A446YDA8;A0A446XDX2;A0A446YDJ9;A0A446XDW5;A0A287WKD5;A0A446T886;A0A446YDB7;A0A446UFE4;A0A287RVV7;A0A287RVJ5;A0A287RW18;A0A446UFG7;A0A446T880;M7ZKH8	178
22.7911224365234	23.8065204620361	22.6885643005371	23.1754207611084	23.6103172302246	23.5144195556641	25.6144218444824	25.5440692901611	25.815580368042	9	9	9	56.4	56.4	56.4	18.199	0	55.724	575040000	19	29	A0A3B5Y269;A0A446J1M8;A0A446J1L4;A0A446J1V3;M7ZZV1;A0A3B5ZVX4;A0A287FQU5;M0V715;A0A287FQU7;A0A287FQW8;A0A3B5YZK0;F2DV62;F2E7I2;A0A446K9L8;A0A3B5YYE5	A0A3B5Y269;A0A446J1M8;A0A446J1L4;A0A446J1V3;M7ZZV1	205
26.1207408905029	23.6932716369629	26.2228412628174	26.4571514129639	23.630428314209	26.1756191253662	22.9449996948242	22.6215744018555	22.2238807678223	6	6	2	21.1	21.1	7.2	52.157	0	36.001	1007800000	19	21	A0A446JM15;A0A446JM20;P08819;A0A3B5YSY9;A0A446JMI6;A0A3B5ZPT5;Q7X9N0;P08818;F2CT80;A0A287ESU5;A0A287ESV3;A0A3B6ELL9;M8AZM6;A0A446NA43;A0A446N8Q5;A0A446N9S4;A0A446N925;A0A446N9K6;A0A446N924	A0A446JM15;A0A446JM20;P08819;A0A3B5YSY9;A0A446JMI6;A0A3B5ZPT5	227
24.0244808197021	23.5279216766357	23.1172828674316	24.3182621002197	22.1551551818848	23.5928325653076	24.0139122009277	23.1466445922852	21.9080104827881	4	4	1	11	11	3.1	48.165	0	24.656	29255000	19	2	A0A3B6A3E9;A0A446KDJ7	A0A3B6A3E9;A0A446KDJ7	245
24.0021533966064	22.4671878814697	24.6888580322266	23.123161315918	23.4732685089111	23.1093788146973	25.0289688110352	24.7855644226074	24.7995643615723	6	6	2	29.6	29.6	12.8	26.748	0	37.056	283990000	19	13	W5CQ97;A0A3B6GQ71;Q1XHC6;A0A446NDF6;F2E781;Q1ENE9;F2DNM2;A0A287KT66;B5ACE0;A0A446PNY9;A0A287KT59;A0A446PNQ4	W5CQ97;A0A3B6GQ71;Q1XHC6;A0A446NDF6;F2E781;Q1ENE9;F2DNM2;A0A287KT66;B5ACE0	299
23.0081348419189	23.1124877929688	22.6299571990967	22.794454574585	22.7758693695068	23.2567405700684	23.9889583587646	23.4602661132813	22.8183650970459	2	2	2	11.7	11.7	11.7	29.175	0	12.314	4895900	18	2	A0A3B6TBF6;A0A3B6RAJ1;A0A3B6T7J2;A0A446P8E5;A0A077RTE5;W5I5G5;A0A446WWQ1;A0A3B6GN26;M7YJ37;A0A446WWU2;A0A446P8G6;A0A446P9B9;A0A446WWP0;A0A287JW01;A0A287JW17;A0A287DWL7;A0A446P8F2;A0A287JWA7;A0A287JW91;A0A446P8L5;T1NAR9;A0A3B6FH33;A0A1D6RUW7;A0A446P8C3;M0VD47;A0A446P8F0;A0A287JW22;A0A446P8U2;A0A287DWP5	A0A3B6TBF6;A0A3B6RAJ1;A0A3B6T7J2;A0A446P8E5;A0A077RTE5;W5I5G5;A0A446WWQ1;A0A3B6GN26;M7YJ37;A0A446WWU2;A0A446P8G6;A0A446P9B9;A0A446WWP0;A0A287JW01;A0A287JW17;A0A287DWL7;A0A446P8F2;A0A287JWA7;A0A287JW91;A0A446P8L5;T1NAR9;A0A3B6FH33;A0A1D6RUW7;A0A446P8C3;M0VD47;A0A446P8F0;A0A287JW22;A0A446P8U2;A0A287DWP5	13
24.555549621582	24.2484912872314	24.2192115783691	23.8260879516602	22.2305450439453	23.9385414123535	22.6526584625244	21.836893081665	22.7591972351074	1	1	1	6.7	6.7	6.7	27.338	0	7.188	0	18	1	A0A446UF33;A0A287RUT2;A0A287RUK0;F2EJ11;F2E397;A0A446UF22;A0A446Q8U1;A0A446NY95;A0A3B6LPR1;A0A3B6H2R9;A0A3B6ENQ4;A0A077S6B3;A0A287RUX2	A0A446UF33;A0A287RUT2;A0A287RUK0;F2EJ11;F2E397;A0A446UF22;A0A446Q8U1;A0A446NY95;A0A3B6LPR1;A0A3B6H2R9;A0A3B6ENQ4;A0A077S6B3;A0A287RUX2	27
28.9830760955811	29.5011386871338	23.0403251647949	29.0993881225586	29.0093994140625	29.1769790649414	28.8064575195313	28.8002052307129	29.781457901001	10	10	1	71.7	71.7	8.5	23.357	0	60.092	11607000000	18	52	Q84UH6;A0A446IJP4;A0A3B5XVD9;M7ZKX9;A0A446IJQ9;Q2MG89;A0A0M4G4F2;A0A0M3R8D3	Q84UH6;A0A446IJP4;A0A3B5XVD9;M7ZKX9;A0A446IJQ9;Q2MG89	194
23.4285717010498	23.3295421600342	22.667652130127	23.2393188476563	22.8073978424072	22.202507019043	23.1570911407471	22.5076923370361	22.5430564880371	2	2	2	9.4	9.4	9.4	27.992	0	11.867	31009000	18	4	A0A3B5Y470;A0A446J7F6;A0A446J7D5;A0A446J773;A0A446K628;A0A446Q102;A0A287LRZ0;A0A446K616;A0A446Q0Z5;A0A446K657;A0A446K6H5;A0A446NRU0;A0A287G0F8;A0A3B5ZYM9;A0A287G0G5;A0A3B5Z2J5;A0A077RV05;M8ATY7;A0A446Q100;A0A3B6H0D7;A0A446Q0Y2;A0A287LRY6;A0A446Q0Y7;A0A287LS17;A0A287G0G2;M0Y5J8;A0A446K650;A0A287G0G1;A0A287G0G3;A0A3B6FUI5;A0A3B6EJK0;F2DHC4;A0A446NRT5;A0A287LS14;A0A287G0F7	A0A3B5Y470;A0A446J7F6;A0A446J7D5;A0A446J773;A0A446K628;A0A446Q102;A0A287LRZ0;A0A446K616;A0A446Q0Z5;A0A446K657;A0A446K6H5;A0A446NRU0;A0A287G0F8;A0A3B5ZYM9;A0A287G0G5;A0A3B5Z2J5;A0A077RV05;M8ATY7;A0A446Q100;A0A3B6H0D7;A0A446Q0Y2;A0A287LRY6;A0A446Q0Y7;A0A287LS17;A0A287G0G2;M0Y5J8;A0A446K650;A0A287G0G1;A0A287G0G3;A0A3B6FUI5;A0A3B6EJK0;F2DHC4;A0A446NRT5;A0A287LS14;A0A287G0F7	210
22.7029495239258	22.7453956604004	23.7614707946777	23.0326747894287	23.3718070983887	22.9035129547119	23.9661884307861	23.1400260925293	23.056360244751	1	1	1	5	5	5	28.529	0	6.6874	0	18	1	A0A446MBV3;A0A446L2N3;A0A446L2V5;A0A446MBN7;A0A3B6C6N7;A0A446MBY4;A0A446L2J4;A0A446MBR9;A0A7H4LHY2;A0A446L2T9;A0A3B6AY48;A0A446MBN2;A0A3B6C6G8;M7ZDV3	A0A446MBV3;A0A446L2N3;A0A446L2V5;A0A446MBN7;A0A3B6C6N7;A0A446MBY4;A0A446L2J4;A0A446MBR9;A0A7H4LHY2;A0A446L2T9;A0A3B6AY48;A0A446MBN2;A0A3B6C6G8;M7ZDV3	255
24.180305480957	24.765926361084	23.5701580047607	24.9294929504395	22.8916683197021	22.5331058502197	23.5409374237061	22.8718433380127	24.7526664733887	4	4	2	22.3	22.3	11.4	39.245	0	24.144	266970000	18	7	A0A446L634;A0A3B6B1B4;A0A3B6B267;M7ZJA9;A0A446L677;A0A446L612	A0A446L634;A0A3B6B1B4;A0A3B6B267;M7ZJA9;A0A446L677;A0A446L612	258
23.369535446167	24.2017230987549	24.2381954193115	24.8342208862305	24.2379188537598	24.1857852935791	24.3169231414795	24.7316913604736	24.4379043579102	4	4	1	23	23	7.9	26.447	0	24.886	262590000	18	24	A5A8U9;A0A446QQL7;A0A3B6HNY3;A5A8V1;Q9ZSR6;Q9SBB7;A0A650AQF3;A0A446S9J3;A0A446QQ39;A0A446S9D2;A0A446S9L9	A5A8U9;A0A446QQL7;A0A3B6HNY3;A5A8V1;Q9ZSR6;Q9SBB7;A0A650AQF3;A0A446S9J3;A0A446QQ39;A0A446S9D2;A0A446S9L9	303
22.4281368255615	22.5901966094971	22.5049724578857	23.0159015655518	21.8633937835693	23.6616039276123	23.2110233306885	22.7547550201416	22.8576030731201	2	2	2	10.2	10.2	10.2	28.522	0	12.027	25165000	18	3	A0A3B6I3L9;A0A446X091;F2D668;F2DNE5;A0A446X0B7;A0A3B6TJW7;A0A3B6RCJ8;A0A446RHQ9;M8A6J5;A0A446KCZ3;A0A287HDN5;A0A446KD06;A0A287GPL7;A0A446X0B2;A0A3B5Z649;A0A3B5Y6N2;M7YR90;A0A446JDK4;A0A287HDA3;A0A3B6A2V3;A0A287HDH2;A0A287MJN6;A0A287HDJ1;A0A287MJN7;A0A287HDD4;A0A446JDQ3;A0A287HDK1;A0A287HDI1;A0A287HDE9;A0A287HDJ6;A0A287MJP4;A0A287HD88;A0A446KE59;A0A287HDJ2	A0A3B6I3L9;A0A446X091;F2D668;F2DNE5;A0A446X0B7;A0A3B6TJW7;A0A3B6RCJ8;A0A446RHQ9;M8A6J5;A0A446KCZ3;A0A287HDN5;A0A446KD06;A0A287GPL7;A0A446X0B2;A0A3B5Z649;A0A3B5Y6N2;M7YR90;A0A446JDK4;A0A287HDA3;A0A3B6A2V3;A0A287HDH2;A0A287MJN6;A0A287HDJ1;A0A287MJN7;A0A287HDD4;A0A446JDQ3;A0A287HDK1;A0A287HDI1;A0A287HDE9;A0A287HDJ6;A0A287MJP4;A0A287HD88;A0A446KE59;A0A287HDJ2	328
23.3804016113281	24.4593467712402	22.9314613342285	24.4581184387207	23.6077728271484	22.2068996429443	23.355094909668	23.7970809936523	22.6252117156982	2	2	2	9.4	9.4	9.4	28.751	0	11.836	8027800	18	2	A0A446S277;C4IXS3;C4IXS2;A0A446S276;A0A3B6JGG4;M0VMM9;A0A287NRU7;A0A287NSG0;A0A287NRS7;A0A287NRT2;A0A446S289;A0A287NS73;B3DFH0;A0A287NRU1	A0A446S277;C4IXS3;C4IXS2;A0A446S276;A0A3B6JGG4;M0VMM9;A0A287NRU7;A0A287NSG0;A0A287NRS7;A0A287NRT2;A0A446S289;A0A287NS73;B3DFH0;A0A287NRU1	353
24.0000629425049	22.5464687347412	23.160831451416	22.5372142791748	23.1156120300293	23.5287990570068	22.9783611297607	22.7650394439697	23.5906276702881	7	3	2	33.9	13.7	9	29.914	0	18.113	2639600000	18	2	A0A446TL77;A0A3B6KPY9;A0A446TLI2;A0A3B6KQI7;M7YDS2;A0A446TL57;A0A3B6KSH6;A0A3B6LW98;A0A3B6N0S7	A0A446TL77;A0A3B6KPY9;A0A446TLI2;A0A3B6KQI7	369
23.0886306762695	24.2024974822998	22.5124130249023	23.2544956207275	23.4104862213135	23.1129550933838	23.4150447845459	23.249475479126	22.6636066436768	6	2	1	31.2	11.7	4.5	27.101	0	11.961	363120000	18	25	A0A3B6LT59;A0A446UM02	A0A3B6LT59	388
29.1458148956299	29.4198112487793	23.7334690093994	30.1894283294678	30.3499488830566	30.5373268127441	28.8697948455811	30.2227382659912	29.9612693786621	9	9	4	48.7	48.7	29.5	29.653	0	57.377	11902000000	18	58	A0A446UTR7;A0A3B6LV31;A0A446UTR4;A0A3B6LWE2;Q07810;A0A446UUH9;V9I194;A0A1D5ZL98;A0A446UTN6	A0A446UTR7;A0A3B6LV31;A0A446UTR4;A0A3B6LWE2;Q07810;A0A446UUH9;V9I194;A0A1D5ZL98	396
26.5603122711182	26.236536026001	26.1101245880127	26.3601627349854	26.0565586090088	26.100191116333	26.9762897491455	26.803165435791	23.6288166046143	6	6	0	32.7	32.7	0	27.028	0	35.799	1239000000	18	32	A0A3B6MXI6	A0A3B6MXI6	401
23.1723480224609	24.3381652832031	23.3943252563477	22.2986431121826	22.7950077056885	24.1831073760986	23.6950836181641	23.0727062225342	22.8570594787598	2	2	2	16.2	16.2	16.2	23.54	0	11.747	48564000	18	1	A0A446YPQ1;A0A3B6SJF8;A0A3B6TIG0;A0A287XCN1;A0A446XQ60;A0A3B6RN44;F2DDK1;A0A446YPV9;M7Z441	A0A446YPQ1;A0A3B6SJF8;A0A3B6TIG0;A0A287XCN1;A0A446XQ60;A0A3B6RN44;F2DDK1;A0A446YPV9;M7Z441	448
23.1788063049316	22.8609313964844	23.7393493652344	22.7471809387207	23.1238136291504	23.7167453765869	25.0928115844727	25.0334281921387	25.2005271911621	7	6	5	52.5	42.6	37.7	20.784	0	36.946	215500000	18	12	A0A446K9B2;A0A3B5Z2Q8;A0A3B5Z2R1;A0A446JA86;A0A446JAN3;A0A3B5Y550;A0A3B6A087;A0A3B5Y660;M7YTZ4;A0A446JA88;A0A446K904;A0A3B6A1I0	A0A446K9B2;A0A3B5Z2Q8;A0A3B5Z2R1	478
23.8862571716309	24.0701160430908	22.9220123291016	22.013765335083	23.4666728973389	23.927978515625	23.4248695373535	22.6160087585449	23.5314273834229	4	2	2	28.7	12.3	12.3	34.166	0	12.535	152340000	18	1	A0A446MI02;W5B8D6;A0A446MHZ2	A0A446MI02;W5B8D6;A0A446MHZ2	488
22.2294502258301	27.1609649658203	27.0790786743164	26.4476318359375	26.5793151855469	26.6349182128906	22.9324951171875	22.3668174743652	22.74924659729	8	8	8	47	47	47	36.236	0	48.07	1364300000	18	20	A0A446Q8F3;A0A077RY90;A0A446YNN1;A0A287X9S2;A0A446YNI1;A0A3B6RMJ1;A0A3B6SPH6;A0A3B6TUD9;M8AMX9;A0A446YNG7;A0A446XNS9;A0A287X9F8;A0A287X9J0;A0A446YNE6;A0A446XNT1;A0A446YNE7;A0A446YNE2;A0A446XNS2;A0A3B6TV06;A0A446XNY3;A0A446XNS7;A0A287M898	A0A446Q8F3;A0A077RY90	500
24.5998287200928	23.1084270477295	22.4156475067139	24.002592086792	23.1018009185791	23.0579643249512	25.505428314209	25.3598442077637	25.5419139862061	1	1	1	5.2	5.2	5.2	29.311	0.0034014	6.3343	151560000	18	9	A0A446UTL6;A0A446TKM2	A0A446UTL6;A0A446TKM2	517
25.4751262664795	24.8117637634277	23.0573787689209	23.796875	24.165563583374	23.3143367767334	23.2298278808594	22.7543277740479	23.3963851928711	5	5	3	26.2	26.2	10	34.252	0	29.692	205530000	18	9	W5AQ78;W5BUF4;M7Z243;A0A3B6B2Z6	W5AQ78;W5BUF4;M7Z243	601
25.6587257385254	23.9075508117676	25.3014888763428	22.9146423339844	22.4088535308838	25.1368446350098	23.4913349151611	23.5694370269775	23.3124256134033	6	6	1	36.2	36.2	14.3	33.331	0	36.025	1081500000	17	54	A0A446PDS0;A0A077RSI3;A0A3B6EEA7;A0A3B6FGM9;A0A446N3T7;A0A446PD99;A0A446PFC0;A0A446N3V3;A0A446N493;A0A446N464;A0A446N3T8;A0A446N3W2;A0A446PDW8;A0A446N442;A0A446PD48;M8ALB9;A0A446PDH9;A0A287K579;A0A446Q4Z6;M0UFI7;A0A446NVZ2;A0A446Q4W5;A0A3B6FWI0;A0A446NVY4;A0A077RX55;A0A446Q4Y4;A0A287K547	A0A446PDS0;A0A077RSI3;A0A3B6EEA7;A0A3B6FGM9;A0A446N3T7;A0A446PD99;A0A446PFC0;A0A446N3V3;A0A446N493;A0A446N464;A0A446N3T8;A0A446N3W2;A0A446PDW8;A0A446N442;A0A446PD48;M8ALB9;A0A446PDH9	11
26.7239036560059	27.0887126922607	23.631965637207	23.2442531585693	24.114673614502	26.8837852478027	23.5123538970947	22.9122791290283	22.6786651611328	5	5	0	32	32	0	24.734	0	29.643	805790000	17	13	A0A0F7KKA2;P93606;A0A446LLD6;Q56DH8;M7ZZN3;A0A446LLA4;A0A446LLB0;I0AW27;A0A446LLD4;A0A446LLH5;A0A287JL45;A0A446MV64;A0A287JL91;B6VEM1;I0AW26	A0A0F7KKA2;P93606;A0A446LLD6;Q56DH8;M7ZZN3;A0A446LLA4;A0A446LLB0;I0AW27;A0A446LLD4	43
23.5083198547363	23.8384037017822	23.4852676391602	23.8585586547852	23.3901309967041	24.8318767547607	22.8100395202637	22.4487495422363	22.1567649841309	2	2	2	9.5	9.5	9.5	27.539	0	11.62	27891000	17	3	A0A287IM69;A0A287IM68;A0A287IM21;A0A3B6C8C5;A0A1D5US77;A0A287IM25;A0A446MFC1;T1NT49;A0A446L6K7;A0A446L6G8;A0A3B6B1X5;A0A3B6B0J6	A0A287IM69;A0A287IM68;A0A287IM21;A0A3B6C8C5;A0A1D5US77;A0A287IM25;A0A446MFC1;T1NT49;A0A446L6K7;A0A446L6G8;A0A3B6B1X5;A0A3B6B0J6	66
24.4472351074219	24.7948627471924	24.7431945800781	23.5664920806885	24.4925289154053	24.5633716583252	24.3897018432617	22.660249710083	23.0608444213867	5	5	2	35.8	35.8	25.9	32.578	0	31.569	231210000	17	21	A0A446KD67;A0A446KCY1;A0A446KCX9;A0A446KD27;A0A3B5Z5T0;F2CQR0;A0A446KCW6;A0A446KCU9;A0A446KCY4;A0A3B6A1V2;A0A287GPA0;A0A287GPE9;A0A287GPD3;A0A287GP91;A0A287GPA1;A0A287GPA8;A0A446KCY6;A0A287GPF4;A0A287GP95;A0A287GPC3;A0A287GPD9	A0A446KD67;A0A446KCY1;A0A446KCX9;A0A446KD27;A0A3B5Z5T0;F2CQR0;A0A446KCW6;A0A446KCU9;A0A446KCY4;A0A3B6A1V2	238
23.3483619689941	22.0862655639648	23.2788181304932	22.9930171966553	22.5481281280518	23.8029270172119	22.274435043335	23.4680404663086	22.9844303131104	2	2	2	11.6	11.6	11.6	24.952	0	11.717	84634000	17	6	A0A3B5ZR32;A0A446IRQ2;A0A3B5ZSU3;A0A3B5ZRK2;A0A446JR74;M7YAG3;A0A446JR72;M0UZ59;F2DM28;A0A287F367;A0A287F347;A0A446JR71;A0A287F334;A0A446JRA7;A0A446JR76;A0A287F348;A0A3B5YVZ6;A0A446JR90;A0A287F339	A0A3B5ZR32;A0A446IRQ2;A0A3B5ZSU3;A0A3B5ZRK2;A0A446JR74;M7YAG3;A0A446JR72;M0UZ59;F2DM28;A0A287F367;A0A287F347;A0A446JR71;A0A287F334;A0A446JRA7;A0A446JR76;A0A287F348;A0A3B5YVZ6;A0A446JR90;A0A287F339	241
24.3472881317139	22.9096374511719	22.779878616333	22.7710838317871	22.3873596191406	22.9885845184326	23.1309623718262	23.789514541626	22.9899578094482	2	2	2	17.3	17.3	17.3	25.916	0	12.821	8611800	17	1	A0A3B6IRU6;A0A446S2H3;A0A3B6JJY5;A0A446S2F8;A0A446QZF5;A0A287NVF3;A0A446U0S9;A0A446U0K1;A0A446SUV7;A0A446SUT7;A0A446QZJ2;F2DLC2;A0A3B6MN82;A0A3B6LIH4;M8A1Z1;A0A3B6HSJ9;A0A287NV02;A0A446U0R1;A0A446SUT8;A0A446SUU7;A0A446U0L7;A0A287NUQ4;A0A446SUT4;A0A446U0K2;A0A3B6KC92;A0A287NUP7	A0A3B6IRU6;A0A446S2H3;A0A3B6JJY5;A0A446S2F8;A0A446QZF5;A0A287NVF3;A0A446U0S9;A0A446U0K1;A0A446SUV7;A0A446SUT7;A0A446QZJ2;F2DLC2;A0A3B6MN82;A0A3B6LIH4;M8A1Z1;A0A3B6HSJ9;A0A287NV02;A0A446U0R1;A0A446SUT8;A0A446SUU7;A0A446U0L7;A0A287NUQ4;A0A446SUT4;A0A446U0K2;A0A3B6KC92;A0A287NUP7	342
23.8752422332764	23.5376129150391	24.1789684295654	23.0677280426025	23.4670238494873	23.4912910461426	23.5247039794922	23.6864471435547	22.3821067810059	2	2	2	13	13	13	19.675	0	12.899	115310000	17	6	A0A446UMT5;A0A446UMW6;A0A446TFF5;A0A3B6KQD1;A0A446UMV6;A0A3B6LTH8;M7ZUT0	A0A446UMT5;A0A446UMW6;A0A446TFF5;A0A3B6KQD1;A0A446UMV6;A0A3B6LTH8;M7ZUT0	371
23.4584693908691	23.714376449585	22.8412475585938	23.4527053833008	22.6282138824463	22.5635452270508	23.8074474334717	22.7659645080566	23.9981307983398	6	5	5	36.1	36.1	36.1	31.628	0	28.981	4091100000	17	8	A0A3B6RB62	A0A3B6RB62	431
25.9945964813232	26.0322303771973	26.3395843505859	26.1990299224854	23.3971271514893	26.1014728546143	25.9170684814453	25.8580894470215	25.688325881958	7	7	1	50.6	50.6	8.2	17.849	0	41.92	1263600000	17	41	A0A446Y740;A0A3B6SG07;A0A3B6SFK5;M7YQ69;M7ZDM4;F2D1X5;A0A446S8G2;A0A446S8F9;A0A446S8D0;A0A3B6IQX6	A0A446Y740;A0A3B6SG07;A0A3B6SFK5;M7YQ69	446
22.9938774108887	25.0783863067627	24.1471729278564	24.7988224029541	22.7669658660889	24.9646396636963	24.9346752166748	23.303560256958	25.0389633178711	5	2	0	33.2	13.8	0	25.356	0	12.058	295710000	17	15	A0A4D6DJB4;A3FKE5;A0A3B6CFS9;A0A0E3T450;A0A446MV48;A0A446MV93;A0A446MUT4	A0A4D6DJB4;A3FKE5;A0A3B6CFS9;A0A0E3T450;A0A446MV48	541
24.0812950134277	23.8577747344971	24.1614093780518	24.1545906066895	23.575288772583	23.3131980895996	22.0084133148193	21.9387073516846	24.3857021331787	1	1	1	13.8	13.8	13.8	18.629	0	6.4179	0	16	1	A0A287VAM4;A0A446M8A8;A0A446KYR9;A0A3B6AXA2;A0A287I2M9;A0A287I2K0;A0A446KYU4;A0A446M861;A0A446YVM4;A0A287VAF4;T1LUP0;A0A287I2Y0;E6Y0T1;A0A446M867;A0A287VAE8;T1LCU7;A0A287VAE3;A0A023ZT67;A0A446YVS7;A0A446YW57;A0A446VWV4;A0A287VAH9;A0A287VAL6;A0A287VAM8;A0A287VAM1;A0A3B6SRT5;A0A287VAK0;A0A287VAI8;A0A287VAL4;A0A446VWS6;A0A287VAJ0;A0A287VAI4;A0A287I2Y3;T1N1J6	A0A287VAM4;A0A446M8A8;A0A446KYR9;A0A3B6AXA2;A0A287I2M9;A0A287I2K0;A0A446KYU4;A0A446M861;A0A446YVM4;A0A287VAF4;T1LUP0;A0A287I2Y0;E6Y0T1;A0A446M867;A0A287VAE8;T1LCU7;A0A287VAE3;A0A023ZT67;A0A446YVS7;A0A446YW57;A0A446VWV4;A0A287VAH9;A0A287VAL6;A0A287VAM8;A0A287VAM1;A0A3B6SRT5;A0A287VAK0;A0A287VAI8;A0A287VAL4;A0A446VWS6;A0A287VAJ0;A0A287VAI4;A0A287I2Y3;T1N1J6	0
22.8232917785645	24.5782890319824	22.7938270568848	23.6811122894287	24.1057319641113	23.4740619659424	22.9092330932617	23.1651210784912	22.5445041656494	1	1	1	7.3	7.3	7.3	23.653	0	6.7286	0	16	1	A0A446P400;A0A3B6EQQ1;A0A446P3N2;A0A3B6ESC8;A0A077RY45;A0A446QER0;A0A3B6FX77;T1M4L5	A0A446P400;A0A3B6EQQ1;A0A446P3N2;A0A3B6ESC8;A0A077RY45;A0A446QER0;A0A3B6FX77;T1M4L5	23
23.6080303192139	23.7546615600586	23.4702453613281	23.2279739379883	22.9820232391357	23.2343292236328	23.2198886871338	21.4349212646484	22.2766532897949	1	1	1	6.3	6.3	6.3	29.372	0	6.6335	0	16	2	A3F8A9;A0A446YZF6;Q9XGB1;Q9XGB3;A0A3B6TZY6;A0A446XZN8;A0A287E803;A0A446Y005;A0A287E820;A0A0F6QDD4;A0A446XZD6;O04074;A0A446XZK6;A0A446XZ99;Q9FUU8;A0A287E833;A0A446XZP3;A0A446XZ79;A0A3B6RT04;A0A287E815;Q9XGB2;A0A287E843;A0A287E818;A0A287E848;M7ZQ95;A0A287E830;A0A287E819;A0A446XZ83;Q9XED2;A0A3B6TMZ7;A0A287E811;A0A287E825;A0A446XZ70;C3W8M1;A0A287E837;A0A446YZR3;A0A287E822;A0A446XZ89;A0A446XZQ0;A0A446…	A3F8A9;A0A446YZF6;Q9XGB1;Q9XGB3;A0A3B6TZY6;A0A446XZN8;A0A287E803;A0A446Y005;A0A287E820;A0A0F6QDD4;A0A446XZD6;O04074;A0A446XZK6;A0A446XZ99;Q9FUU8;A0A287E833;A0A446XZP3;A0A446XZ79;A0A3B6RT04;A0A287E815;Q9XGB2;A0A287E843;A0A287E818;A0A287E848;M7ZQ95;A0A287E830;A0A287E819;A0A446XZ83;Q9XED2;A0A3B6TMZ7;A0A287E811;A0A287E825;A0A446XZ70;C3W8M1;A0A287E837;A0A446YZR3;A0A287E822;A0A446XZ89;A0A446XZQ0;A0A446…	41
23.8259906768799	23.2451572418213	23.1497402191162	22.8247146606445	23.3626346588135	22.9922962188721	25.2500305175781	25.2887687683105	25.5522727966309	11	3	3	76	20.7	20.7	18.523	0	18.013	245040000	16	11	A0A3B5Z2Q5;A0A3B5Z3R9;A0A0M4HM24;A0A446K8X1;A0A446K8Z8;Q8GV47;A0A446K8X6	A0A3B5Z2Q5;A0A3B5Z3R9;A0A0M4HM24;A0A446K8X1;A0A446K8Z8;Q8GV47;A0A446K8X6	49
23.0157012939453	23.4779567718506	22.5947399139404	23.0039405822754	23.928689956665	22.903205871582	22.6013431549072	23.3016510009766	22.6922130584717	1	1	1	5.9	5.9	5.9	25.464	0	6.6241	0	16	2	A0A446KSP9;M7YPU4;A0A287HQX9;A0A446KST3;A0A446KSZ5;A0A446M3N3;A0A3B6C3G4;A0A446KSS0;A0A446KSU3;A0A3B6AWA5;F2D9F0;A0A446M400;A0A3B6C3E2;A0A1D5V2T0	A0A446KSP9;M7YPU4;A0A287HQX9;A0A446KST3;A0A446KSZ5;A0A446M3N3;A0A3B6C3G4;A0A446KSS0;A0A446KSU3;A0A3B6AWA5;F2D9F0;A0A446M400;A0A3B6C3E2;A0A1D5V2T0	72
23.4698371887207	23.4849281311035	23.2445163726807	22.6676483154297	23.4320106506348	22.8430805206299	23.0373821258545	22.7143039703369	23.539400100708	2	2	2	33.3	33.3	33.3	18.055	0	11.601	61735000	16	2	A0A446M1E0;A0A3B6C2B8;A0A1D5V328;Q8L808;A0A446KRJ0;A0A3B6AUA6;F2DIN7;A0A287HJJ5	A0A446M1E0;A0A3B6C2B8;A0A1D5V328;Q8L808;A0A446KRJ0;A0A3B6AUA6;F2DIN7;A0A287HJJ5	73
24.1022205352783	22.6510696411133	23.6445064544678	22.7349948883057	22.5078029632568	23.7077083587646	22.5732650756836	22.633056640625	22.1603832244873	2	2	2	9.7	9.7	9.7	28.096	0	11.745	33945000	16	3	A0A3B6LKC3;A0A446SYF2;A0A446U403;A4GSN6;A0A1D5YQ12;Q6DQK1;A0A446SYJ5;Q5G1L6;A4GSN7;B6UZ79;B1NC18;F2CZM9;A0A446U415;M7ZF15;B6UZ81;B6UZ83;B6UZ85;A0A446U432;A0A446SYG3;A0A446SYF7;B6UZ80;A0A446SYF4;A0A446U414;A0A446U431;A4GSN5;Q945F6;B6UZ84	A0A3B6LKC3;A0A446SYF2;A0A446U403;A4GSN6;A0A1D5YQ12;Q6DQK1;A0A446SYJ5;Q5G1L6;A4GSN7;B6UZ79;B1NC18;F2CZM9;A0A446U415;M7ZF15;B6UZ81;B6UZ83;B6UZ85;A0A446U432;A0A446SYG3;A0A446SYF7;B6UZ80;A0A446SYF4;A0A446U414;A0A446U431;A4GSN5;Q945F6;B6UZ84	78
22.8919734954834	22.9235363006592	22.9117736816406	24.0738964080811	22.5062885284424	23.3220691680908	23.7241306304932	22.5615749359131	23.1651153564453	2	2	2	12.5	12.5	12.5	22.076	0	11.653	40713000	16	4	A0A287L3P5;A0A3B6GTZ6;A0A3B6TME0;A0A446X7E5;A0A3B6RFV1;A0A446Y7C5;A0A446X7R8;A0A3B6SFL4;T1N694;A0A446PTG7;W5CWR9;A0A446PTL9;A0A3B6EGX5;M0Z0Z6;T1N8M0;A0A287L3Q1;A0A287L3P4;A0A287L3P8;A0A446NI53;A0A3B6TNH6;A0A446Y7C4;A0A446Y7A7;A0A3B6RFQ2;A0A3B6SDV0	A0A287L3P5;A0A3B6GTZ6;A0A3B6TME0;A0A446X7E5;A0A3B6RFV1;A0A446Y7C5;A0A446X7R8;A0A3B6SFL4;T1N694;A0A446PTG7;W5CWR9;A0A446PTL9;A0A3B6EGX5;M0Z0Z6;T1N8M0;A0A287L3Q1;A0A287L3P4;A0A287L3P8;A0A446NI53;A0A3B6TNH6;A0A446Y7C4;A0A446Y7A7;A0A3B6RFQ2;A0A3B6SDV0	129
23.6577091217041	23.8682727813721	24.0373287200928	21.855489730835	23.6934070587158	23.5308799743652	23.3015594482422	23.5179328918457	24.3469829559326	2	2	2	11.1	11.1	11.1	22.71	0	11.665	20624000	16	2	T1MKQ3;A0A287RUW1;A0A287RUD7;W5F826;A0A446T7W2;A0A287RUL2;A0A287RUQ0;A0A287RUN4;A0A287RUE1	T1MKQ3;A0A287RUW1;A0A287RUD7;W5F826;A0A446T7W2;A0A287RUL2;A0A287RUQ0;A0A287RUN4;A0A287RUE1	152
24.6759452819824	24.1130695343018	24.6288967132568	23.6058540344238	24.0389213562012	23.8168506622314	24.6690921783447	24.8374481201172	24.5745582580566	3	3	3	30.1	30.1	30.1	23.774	0	19.365	401750000	16	31	M0ZCE0;A0A446JZ00;W4ZLP9;A0A446JYW9;A0A446J064;A0A3B5YXW1;A0A446J065;A0A446JYZ2;A0A287FU97;A0A446JYX7;A0A446J063;M8A713;A0A446J0D8	M0ZCE0;A0A446JZ00;W4ZLP9;A0A446JYW9;A0A446J064;A0A3B5YXW1;A0A446J065;A0A446JYZ2;A0A287FU97;A0A446JYX7;A0A446J063;M8A713;A0A446J0D8	231
22.6013469696045	22.4940662384033	22.7229118347168	23.2831840515137	23.5064735412598	23.1801815032959	21.9416255950928	22.8042659759521	22.2124729156494	2	2	2	11.6	11.6	11.6	22.743	0	12.22	31645000	16	4	A0A446LGQ7;A0A446LGN0;A0A446LGN3;A0A446LGN6;A0A446LGT3;A0A446LGK9;A0A446LGP3;A0A446LGQ2;A0A446LGK5;A0A446LGQ0;A0A3B6B5J2;A0A6G7MCI4;F2CYJ8;A0A3B6DKQ2;A0A023JMN5;A0A7H4LN44;A0A446LGP6;A0A287J8T7;A0A3B6DN70;A0A287J976;M0Z4E9;A0A287J920;M0Z4F0	A0A446LGQ7;A0A446LGN0;A0A446LGN3;A0A446LGN6;A0A446LGT3;A0A446LGK9;A0A446LGP3;A0A446LGQ2;A0A446LGK5;A0A446LGQ0;A0A3B6B5J2;A0A6G7MCI4;F2CYJ8;A0A3B6DKQ2;A0A023JMN5;A0A7H4LN44;A0A446LGP6;A0A287J8T7;A0A3B6DN70;A0A287J976;M0Z4E9;A0A287J920;M0Z4F0	260
23.5982666015625	23.7653064727783	23.5612621307373	24.3294773101807	22.5628108978271	23.7559642791748	22.9379348754883	22.8124465942383	22.7692165374756	3	3	3	9.4	9.4	9.4	25.642	0	17.424	1110400000	16	7	A0A446LKX0;A0A3B6CFG7;A0A3B6B7S9;A0A3B6DM86;A0A3B6B780	A0A446LKX0;A0A3B6CFG7;A0A3B6B7S9;A0A3B6DM86	264
23.1723346710205	23.4633121490479	22.9225788116455	22.6128578186035	23.4725151062012	21.7688865661621	22.4558639526367	23.4600105285645	23.3163375854492	5	4	4	41.2	37.6	37.6	27.93	0	25.367	96893000	16	6	A0A446PYB9;A0A3B6GVY3;F2CSR1;A0A287LIF4;A0A3B6FQD3;T1N7Z0;A0A446NNU5;A0A3B6EJA1;A0A446NNK1	A0A446PYB9;A0A3B6GVY3;F2CSR1;A0A287LIF4;A0A3B6FQD3;T1N7Z0;A0A446NNU5;A0A3B6EJA1	300
24.0675525665283	24.0173892974854	23.5609359741211	22.8257446289063	23.7236003875732	23.1641273498535	25.2016124725342	25.0673084259033	25.3371868133545	6	6	6	37.2	37.2	37.2	22.463	0	36.404	257540000	16	14	A0A446NKV3;A0A0F7G9F3;A0A446NKR0;A0A446NL13;A0A3B6EHD5;A0A446NKV5;A0A446NL08;M8A2L5;A0A446PWA2;A0A0F7G9R9;A0A446PW76;A0A3B6FN17;A0A3B6EH38;A0A0F7GA49;F2CRD9;A0A287LFB3;A0A287LF96;A0A287LFA1;A0A446PW23;A0A446PW53;A0A446PW31	A0A446NKV3;A0A0F7G9F3;A0A446NKR0;A0A446NL13;A0A3B6EHD5;A0A446NKV5;A0A446NL08;M8A2L5;A0A446PWA2;A0A0F7G9R9;A0A446PW76;A0A3B6FN17;A0A3B6EH38;A0A0F7GA49	494
24.1064548492432	24.1503505706787	23.5159111022949	23.6731052398682	22.4243545532227	23.7396011352539	23.8675003051758	24.1200485229492	23.1068630218506	4	4	4	14.5	14.5	14.5	33.407	0	24.818	219080000	16	22	F2DZ92;A0A3B6HMS9;A0A3B6IV90;A0A446QL40;A0A446SEC0;A0A3B6JMM7;A0A287PQG2;A0A3B6JN63;A0A287PQA3;A0A287PQA9;A0A287PQH2;A0A287NZM8;A0A287NZQ3;A0A287PQ68;A0A287PQ55;A0A287PQC7;A0A287PQ64;A0A287PR96;A0A287PRB0;A0A287PRA2;A0A287PQ90;A0A287NZV5;A0A287PQB8;A0A446SE73;A0A446QKF7;A0A287PQ60	F2DZ92;A0A3B6HMS9;A0A3B6IV90;A0A446QL40;A0A446SEC0;A0A3B6JMM7;A0A287PQG2;A0A3B6JN63;A0A287PQA3;A0A287PQA9;A0A287PQH2;A0A287NZM8;A0A287NZQ3;A0A287PQ68;A0A287PQ55;A0A287PQC7;A0A287PQ64;A0A287PR96;A0A287PRB0;A0A287PRA2;A0A287PQ90;A0A287NZV5;A0A287PQB8	565
24.3987636566162	23.8137130737305	23.3589935302734	23.1841773986816	23.2490005493164	23.4829292297363	24.9261474609375	24.9746074676514	25.1744384765625	3	3	1	18.6	18.6	7.1	20.758	0	18.288	832790000	16	30	M7ZMF2	M7ZMF2	573
28.5672512054443	23.1912956237793	28.538122177124	28.9497966766357	28.1954479217529	29.2126407623291	30.525426864624	30.114086151123	30.6351261138916	12	12	1	65.3	65.3	8	24.502	0	79.324	13370000000	16	70	Q6UJY8	Q6UJY8	591
23.7567653656006	24.0944499969482	23.7040500640869	23.4023513793945	23.3512916564941	22.4106464385986	23.2842712402344	22.7988929748535	23.5599517822266	2	2	2	25.2	25.2	25.2	14.015	0	12.082	37402000	15	1	A0A1D5SLF7;A0A446JG10;A0A446JFX8;A0A3B5ZNE1;F2D351;A0A287EEA4	A0A1D5SLF7;A0A446JG10;A0A446JFX8;A0A3B5ZNE1;F2D351;A0A287EEA4	60
22.8254222869873	23.2230491638184	23.0338611602783	22.9536113739014	23.4325275421143	23.4663009643555	23.632230758667	23.6939525604248	23.7798500061035	2	2	2	9.7	9.7	9.7	33.261	0	11.844	62613000	15	4	M7ZNZ2;A0A446MKA5;A0A3B6CAL0;Q06IA1;A0A1D6DB09;M0Z9S4;A0A3B6B3J1	M7ZNZ2;A0A446MKA5;A0A3B6CAL0;Q06IA1;A0A1D6DB09;M0Z9S4;A0A3B6B3J1	86
24.0055656433105	23.0618457794189	23.0873756408691	23.6305770874023	22.9412422180176	23.0950927734375	21.6692390441895	22.9112014770508	23.7617111206055	2	2	2	14.9	14.9	14.9	19.49	0	11.618	51092000	15	4	A0A287K7G2;A0A287K7L8;W5D067;F2CT61;A0A3B6GLN8;A0A3B6EC38;A0A287K7G8;M8B4A0;A0A446PGI3;A0A446N4W9;A0A446PEX0;A0A287K7H1;A0A446PEP5;A0A446N4V0;F2DGG3	A0A287K7G2;A0A287K7L8;W5D067;F2CT61;A0A3B6GLN8;A0A3B6EC38;A0A287K7G8;M8B4A0;A0A446PGI3;A0A446N4W9;A0A446PEX0;A0A287K7H1;A0A446PEP5;A0A446N4V0;F2DGG3	125
22.8698501586914	23.4578742980957	23.0393676757813	23.903133392334	24.2163562774658	21.9625911712646	23.9354000091553	24.1790447235107	24.4020328521729	6	6	5	47.1	47.1	38.6	17.094	0	37.888	205610000	15	82	A0A287XUU2;A0A3B6PL28;M8AJM6;A0A287TQN2;A0A287TQI5;M7ZY92;A0A446YWG2;F2EH93;A0A446V9A0;A0A446W7H3;A0A287RJZ8;A0A446UAV5;A0A446T3Q9;A0A287TQM7;A0A3B6NNS4;A0A3B6KJN0;M9MTY6;F2CYA6;T1MAB0;W5FEU1;A0A287TQI0;A0A446W7G6;A0A446T3P3;A0A3B6QF77;A0A287TQV3;A0A446XX55;A0A287TQW0;A0A287RJY1;A0A446UAX5;A0A3B6NLJ8;A0A287TQH9;A0A446V9A5;A0A446IYM5;A0A3B5Y0U0;A0A287RJI7;A0A3B5ZVV9;A0A287K647;A0A287VVI9;A0A287VVS…	A0A287XUU2;A0A3B6PL28;M8AJM6;A0A287TQN2;A0A287TQI5;M7ZY92;A0A446YWG2;F2EH93;A0A446V9A0;A0A446W7H3;A0A287RJZ8;A0A446UAV5;A0A446T3Q9;A0A287TQM7;A0A3B6NNS4;A0A3B6KJN0;M9MTY6;F2CYA6;T1MAB0;W5FEU1;A0A287TQI0;A0A446W7G6;A0A446T3P3;A0A3B6QF77;A0A287TQV3;A0A446XX55;A0A287TQW0;A0A287RJY1;A0A446UAX5;A0A3B6NLJ8;A0A287TQH9;A0A446V9A5;A0A446IYM5;A0A3B5Y0U0;A0A287RJI7;A0A3B5ZVV9	149
23.9349765777588	24.0608730316162	23.5584163665771	23.8928298950195	25.2705574035645	22.9355525970459	22.5610656738281	24.2686405181885	23.1800727844238	3	3	3	13.9	13.9	13.9	29.125	0	18.006	76757000	15	10	A0A446W3T6;A0A446W3T5;A0A287TG02;A0A287TFZ4;F2D894;A0A446V5L8;A0A3B6QAP5;A0A3B6NM56;A0A446W3T3;A0A3B6PG72;M8A566	A0A446W3T6;A0A446W3T5;A0A287TG02;A0A287TFZ4;F2D894;A0A446V5L8;A0A3B6QAP5;A0A3B6NM56;A0A446W3T3;A0A3B6PG72	160
24.0369148254395	24.5592765808105	24.5000247955322	23.1205253601074	23.6635246276855	23.5766620635986	25.2244606018066	24.6436138153076	22.9994525909424	4	4	4	15.3	15.3	15.3	33.611	0	23.869	186160000	15	11	A0A287WWA8;A0A3B6RK63;A0A446XIL5;A0A446YHZ7;F2DBD4;F2DH85;W5HPC1;A0A3B6SE71;A0A287WVY9;A0A446YI05;A0A446XIK8;A0A446XIX6;A0A446XII7;A0A3B6JES4;M0WXK1;A0A3B6IR18;M7Z059;A0A287WW36;A0A287WVZ3;A0A446XIN3;A0A287ECH6;A0A287ECF2;A0A287ECK9;A0A287WVZ8;A0A446YIK6;A0A446YIE6	A0A287WWA8;A0A3B6RK63;A0A446XIL5;A0A446YHZ7;F2DBD4;F2DH85;W5HPC1;A0A3B6SE71;A0A287WVY9;A0A446YI05;A0A446XIK8;A0A446XIX6;A0A446XII7;A0A3B6JES4;M0WXK1;A0A3B6IR18;M7Z059;A0A287WW36;A0A287WVZ3	181
26.8634872436523	26.9059829711914	26.7992172241211	23.8640079498291	27.0616760253906	27.1011924743652	22.8705997467041	24.7556018829346	23.4309043884277	8	8	8	36.4	36.4	36.4	24.386	0	48.132	1267900000	15	29	A0A3B5YWB5;A0A446JUG5;A0A446IVB0;A0A3B5XYR7;Q9SWZ5;A7YA60;M7ZT29;A0A3B5ZTI5;A0A287FCF3;A0A287FCD3;M0YI94;O24003;F2CRS6;A0A446X691;A0A3B6RBG8;A0A446IV99;A0A3B5XZJ9;A7YA66;A0A446X635;M7ZQ40;M7Z077	A0A3B5YWB5;A0A446JUG5;A0A446IVB0;A0A3B5XYR7;Q9SWZ5;A7YA60;M7ZT29;A0A3B5ZTI5	229
22.8946304321289	24.2773017883301	22.5070381164551	22.7149219512939	23.5333480834961	23.1756210327148	24.188289642334	22.9368534088135	22.3088436126709	8	1	1	41.1	6.8	6.8	23.638	0.0084034	6.2651	0	15	1	A0A446L9W9;A0A3B6B2R3;A0A3B6DFW7	A0A446L9W9;A0A3B6B2R3;A0A3B6DFW7	259
26.3567752838135	26.4222507476807	26.5072135925293	26.3619709014893	26.29762840271	26.4981098175049	27.4912128448486	27.3258590698242	27.1317310333252	6	3	1	49.3	38.6	5.1	27.106	0	21.601	1488800000	15	47	A0A3B6HRX1	A0A3B6HRX1	308
23.3400135040283	23.8389568328857	22.8154678344727	23.2025699615479	23.288049697876	22.9594879150391	22.7256984710693	23.8886432647705	23.8626651763916	7	3	3	40	20.7	20.7	31.791	0	19.269	164290000	15	0	A0A3B6I5M0	A0A3B6I5M0	330
26.8958511352539	26.4809913635254	26.4754981994629	26.2504634857178	26.4983539581299	26.4731140136719	27.3664474487305	27.1957302093506	27.2682991027832	6	6	2	49.3	49.3	24.6	27.037	0	39.589	2085400000	15	80	A0A3B6IX62;A0A446SD90;A0A3B6JL62	A0A3B6IX62;A0A446SD90;A0A3B6JL62	347
27.7312393188477	23.039852142334	22.7012176513672	27.9870681762695	24.7407932281494	23.8535652160645	28.4749088287354	28.2757320404053	23.1115627288818	11	11	1	66.7	66.7	4.9	23.566	0	66.769	4601400000	15	23	A0A3B6LFC8	A0A3B6LFC8	378
24.6026916503906	24.4039268493652	24.5451011657715	24.6280632019043	24.6410255432129	24.4512996673584	25.1243152618408	24.8111267089844	25.0072727203369	3	3	1	18.6	18.6	9	19.782	0	19.055	387570000	15	30	A0A446UPU0;A0A446UPY0;A0A3B6N0E5;A0A3B6LUE2;Q8RW04;Q8RW03;Q8RW02;A0A446UPS7;A0A3B6LUL8;A0A446UPT4;Q9SES7;Q3MUP2;M0YJ76;A8MPH5;A0A446UPV5	A0A446UPU0;A0A446UPY0;A0A3B6N0E5;A0A3B6LUE2;Q8RW04;Q8RW03;Q8RW02;A0A446UPS7;A0A3B6LUL8	392
22.7241630554199	23.9826145172119	23.2827816009521	24.0424423217773	23.2746810913086	23.6182155609131	23.686206817627	22.3655796051025	23.2846240997314	2	2	2	26.9	26.9	26.9	25.11	0	11.96	120950000	15	7	A0A446WHP7;A0A446VJX5;A0A446WHN8;A0A446VK02;A0A446WHB6;A0A446WHE0;A0A446VJX7;A0A446VJT8;A0A446WHL1;A0A446VJU0;A0A3B6PNX4;A0A3B6NT08;A0A3B6QJV8	A0A446WHP7;A0A446VJX5;A0A446WHN8;A0A446VK02;A0A446WHB6;A0A446WHE0;A0A446VJX7;A0A446VJT8;A0A446WHL1;A0A446VJU0;A0A3B6PNX4;A0A3B6NT08;A0A3B6QJV8	414
23.9145278930664	23.3961524963379	23.7864151000977	23.6089057922363	23.2516956329346	23.5740089416504	22.8493270874023	23.1981239318848	23.996639251709	3	3	3	11.5	11.5	11.5	31.551	0	18.765	16533000	15	0	M7YVM9;M0YW47;A0A446XNJ2;A0A3B6TH67;A0A3B6RMC5;A0A3B6SFK9;A0A3B6SFP2;F2DC79;M0VSN9	M7YVM9;M0YW47;A0A446XNJ2;A0A3B6TH67;A0A3B6RMC5;A0A3B6SFK9	441
24.5122947692871	23.5231246948242	23.3896198272705	23.719596862793	23.0387344360352	23.2976741790771	23.540018081665	22.9199810028076	23.4163265228271	6	5	1	33.3	28.3	5	33.504	0	31.02	830900000	15	21	A0A446YZN0;A0A3B6SQ43;P11955;A0A287Y1V0;A0A287Y1T6;A0A287Y202;A0A287Y1P6;A0A287Y1L0;F2EK36;A0A446YZH0;V9I1G6;F2ELX8;A0A287Y1T9;A0A287Y207;A0A3B6TTD6;A0A3B6RSZ5	A0A446YZN0;A0A3B6SQ43;P11955;A0A287Y1V0;A0A287Y1T6;A0A287Y202;A0A287Y1P6;A0A287Y1L0;F2EK36;A0A446YZH0	452
23.1571006774902	22.7773704528809	24.0723896026611	24.2504539489746	30.8020095825195	23.1374740600586	23.6077976226807	23.47336769104	28.334623336792	7	7	4	52.3	52.3	29.7	28.257	0	44.03	8641400000	15	12	A0A3B6SU01	A0A3B6SU01	455
24.4836959838867	30.0353813171387	31.5395469665527	23.6367244720459	22.5690536499023	23.2935905456543	23.5208587646484	23.0489540100098	22.5633983612061	8	8	3	41.4	41.4	17.1	31.91	0	48.252	11281000000	15	13	A0A3B6T7X8;D2KFH2;Q7X9M4;M0VWJ3	A0A3B6T7X8;D2KFH2;Q7X9M4	456
24.2674674987793	23.108793258667	22.4035472869873	23.6423473358154	23.714412689209	23.0292205810547	24.7597942352295	24.7508277893066	24.9528713226318	7	6	2	45	45	14.2	17.528	0	36.671	237490000	15	16	Q7XAP5;A7VL26;A0A446K994;A0A446K900;M7ZFL7;A0A446JA85;F2DW12;M7Y9Y1;A0A3B5Y5L2	Q7XAP5;A7VL26;A0A446K994;A0A446K900;M7ZFL7;A0A446JA85	552
24.8095054626465	23.7886257171631	23.5065269470215	22.9190196990967	24.2737426757813	23.6623916625977	23.3272514343262	22.2414455413818	24.6327934265137	8	2	2	52.7	18.1	18.1	24.557	0	11.803	56496000	15	3	Q0Q5D4	Q0Q5D4	582
23.6377983093262	23.6209030151367	23.1829128265381	23.2485065460205	25.3909015655518	25.0581283569336	25.7149467468262	26.0680675506592	27.7402114868164	5	3	3	12.5	9.4	9.4	84.97	0	18.439	743830000	14	23	A0A068F7N6;V9TQ99;Q8RVX0;K4N1X7;Q6UKZ5;Q7XAI2;Q7XAI0;Q7XAH9;Q7X6V6;Q8H0L4	A0A068F7N6;V9TQ99;Q8RVX0;K4N1X7;Q6UKZ5;Q7XAI2;Q7XAI0;Q7XAH9;Q7X6V6;Q8H0L4	7
24.4313545227051	22.797327041626	23.3447666168213	22.8050384521484	23.3678207397461	23.9690113067627	23.2048225402832	23.1362895965576	22.971076965332	2	2	2	19.2	19.2	19.2	23.684	0	12.362	182990000	14	14	A0A077RXH0;A0A446PD28;A0A3B6FGC8;A0A446LNX8;A0A3B6FK57;F2CZ44;A0A3B6CH41;M8AEP3;A0A3B6B961;A0A1D5UPX2;A0A446LNX0;A0A446MYA6;M7YVK2;A0A446LNZ2;A0A3B6CH77;A0A446MYB1;A0A446LNX3;A0A3B6FJ99	A0A077RXH0;A0A446PD28;A0A3B6FGC8;A0A446LNX8;A0A3B6FK57;F2CZ44;A0A3B6CH41;M8AEP3;A0A3B6B961;A0A1D5UPX2;A0A446LNX0;A0A446MYA6;M7YVK2;A0A446LNZ2;A0A3B6CH77;A0A446MYB1;A0A446LNX3;A0A3B6FJ99	21
23.5043258666992	22.6233901977539	23.4748954772949	22.6630096435547	23.1492099761963	24.7582683563232	22.5739803314209	23.01344871521	24.7201290130615	1	1	1	8.5	8.5	8.5	23.777	0	6.419	0	14	1	A0A446LPB0;A0A077S6A5;A0A3B6B862;A0A7H4LR52;F2DZ09;A0A3B6FYB3;A0A446LP51;A0A3B6CHB9;A0A446MYK8;A0A446QAE8;A0A1D5UL37;M7ZN73;A0A446MYK6;A0A3B6CJF7;A0A3B6DPL3;A0A446MYL8;A0A446QAH3;A0A077S382;A0A3B6H126;T1LN90;A0A446P080;A0A3B6EN56;A0A446P072;A0A446MYK9;A0A446QAH7;M7ZIZ5	A0A446LPB0;A0A077S6A5;A0A3B6B862;A0A7H4LR52;F2DZ09;A0A3B6FYB3;A0A446LP51;A0A3B6CHB9;A0A446MYK8;A0A446QAE8;A0A1D5UL37;M7ZN73;A0A446MYK6;A0A3B6CJF7;A0A3B6DPL3;A0A446MYL8;A0A446QAH3;A0A077S382;A0A3B6H126;T1LN90;A0A446P080;A0A3B6EN56;A0A446P072;A0A446MYK9;A0A446QAH7;M7ZIZ5	26
26.4648513793945	26.3441467285156	26.2735004425049	26.3524551391602	26.3470897674561	26.2901058197021	22.4537963867188	26.8279609680176	21.919584274292	7	7	3	18.8	18.8	9.8	77.331	0	42.169	1438900000	14	32	A0A0E4G9A4;B8PSA6;Q4JHY1;A0A4Y6GR70;A0A142ESP6;A0A068F9H7;A0A068FDL7;A0A2R4QA24;A5Z0T0;A0A068F6W1;W0C8U3;A0A060AER5;A0A2D2CI59;M1PIT5;A0A1G4P1V2;A0A0H4SMF2;A0A1G4P1T5;A9ZMG8;A9YSK3;A4URY8;A0A1I9RW81;P10387;A0A1W6C2J9;Q0Q5D3;A0A1W6C2K2;A0A142ESP7;V9TQA3;A0A165B8S1;Q6RX92;V9TRL3;D2CPI7;A0A2L1K3K4;Q7XYR6;E0W6G5;E4W506;Q52JL3;P08488;Q6RX93;Q8H0L6;A0A023GQG9;W6AW92;B2LS24;D9IAV8;A1YZ38;Q94IJ8;Q9SDM2;B…	A0A0E4G9A4;B8PSA6;Q4JHY1;A0A4Y6GR70;A0A142ESP6;A0A068F9H7;A0A068FDL7;A0A2R4QA24;A5Z0T0;A0A068F6W1;W0C8U3;A0A060AER5	40
24.0821399688721	22.6442356109619	24.0499668121338	23.4204139709473	22.4334049224854	22.7350540161133	23.2895412445068	24.0624141693115	22.547887802124	2	2	2	8.7	8.7	8.7	28.713	0	11.667	90794000	14	4	M0Y8M6;A0A446YDW4;A0A446YDV4;A0A446XE36;M7ZKH9;A0A446YDK7;A0A446XE64;A0A446XE37;A0A3B6TR55;A0A3B6TJ23;A0A3B6SG56;A0A3B6RIK6;A0A1D6C087;M0Y8M7;A0A446YDN8;A0A446XE51	M0Y8M6;A0A446YDW4;A0A446YDV4;A0A446XE36;M7ZKH9;A0A446YDK7;A0A446XE64;A0A446XE37;A0A3B6TR55;A0A3B6TJ23;A0A3B6SG56;A0A3B6RIK6;A0A1D6C087;M0Y8M7;A0A446YDN8;A0A446XE51	83
23.7849941253662	22.9921932220459	22.7241992950439	22.0458087921143	23.4951171875	24.0264568328857	23.5913314819336	24.2786312103271	22.6897277832031	1	1	1	6.6	6.6	6.6	21.999	0.0050934	6.3303	0	14	51	A0A446IM39;A0A446IM43;A0A287ER92;A0A287ERA0;A0A287ER91;A0A446JL53;A0A287ERA4;A0A446JLH6;A0A446JL71;A0A446JLB1;F2DP67;A0A446JLQ6;A0A3B5YSP5;A0A3B5ZR95;A0A287ER97;A0A3B5XVE5	A0A446IM39;A0A446IM43;A0A287ER92;A0A287ERA0;A0A287ER91;A0A446JL53;A0A287ERA4;A0A446JLH6;A0A446JL71;A0A446JLB1;F2DP67;A0A446JLQ6;A0A3B5YSP5;A0A3B5ZR95;A0A287ER97;A0A3B5XVE5	97
23.6327857971191	23.7452983856201	22.4595909118652	23.1786117553711	22.8120422363281	23.4972877502441	22.5812072753906	23.4774475097656	22.3209991455078	2	2	2	19.8	19.8	19.8	26.178	0	11.95	121590000	14	12	A0A287F0B7;A0A3B5XX06;A0A446JQF8;A0A446IQU4;A0A446JQD0;A0A446IQU2;A0A3B5ZSM2;A0A3B5YUB2;A0A3B5XWR2;A0A287F0D6;A0A287F0C4;M7YWB1;A0A446JQG0;A0A446IQV1;A0A3B5ZRI8;A0A3B5YVN4	A0A287F0B7;A0A3B5XX06;A0A446JQF8;A0A446IQU4;A0A446JQD0;A0A446IQU2;A0A3B5ZSM2;A0A3B5YUB2;A0A3B5XWR2;A0A287F0D6;A0A287F0C4;M7YWB1;A0A446JQG0;A0A446IQV1;A0A3B5ZRI8;A0A3B5YVN4	100
23.3686389923096	24.0387878417969	23.2018146514893	22.7882709503174	23.605712890625	22.6089744567871	23.5009880065918	23.217414855957	23.5760955810547	9	2	0	46.6	10.5	0	14.624	0	11.987	108600000	14	3	A0A287FUA1;A0A287FU84;A0A287FU81;Q05191;A0A0B4J2W8;A0A287FU87;A0A287FU85	A0A287FUA1;A0A287FU84;A0A287FU81;Q05191;A0A0B4J2W8;A0A287FU87;A0A287FU85	105
23.7272071838379	23.3220348358154	22.9358520507813	23.6003952026367	22.4432392120361	22.6422386169434	23.7998752593994	23.4620742797852	23.6368217468262	1	1	1	9.2	9.2	9.2	23.066	0	6.5951	0	14	1	A0A446XR66;A0A446YQQ4;A0A287KUS0;A0A446XR74;A0A446YQX8;A0A3B6RNM7;A0A3B6TPE3;A0A446XR62;A0A446YQS4;A0A446XR86;A0A3B6RNN9;A0A446NEM2;A0A446XR83;A0A287KUR3;A0A3B6RNU0;A0A446PPY8;A0A446NEF4;M7ZP21;A0A3B6EF27;A0A3B6RJT9;A0A446YQR1;A0A446NEF7;A0A3B6SPA2;A0A3B6TIW5;W5DFE7;A0A3B6FPH1;A0A446PPR5;M7Z469;A0A287XF72;A0A287XFD6;A0A287KUQ5;A0A446YQM4;A0A287XFG9;A0A446XR57;A0A446NEE5;A0A446PPL8;M0Y9N1;A0A446YQ…	A0A446XR66;A0A446YQQ4;A0A287KUS0;A0A446XR74;A0A446YQX8;A0A3B6RNM7;A0A3B6TPE3;A0A446XR62;A0A446YQS4;A0A446XR86;A0A3B6RNN9;A0A446NEM2;A0A446XR83;A0A287KUR3;A0A3B6RNU0;A0A446PPY8;A0A446NEF4;M7ZP21;A0A3B6EF27;A0A3B6RJT9;A0A446YQR1;A0A446NEF7;A0A3B6SPA2;A0A3B6TIW5;W5DFE7;A0A3B6FPH1;A0A446PPR5;M7Z469;A0A287XF72;A0A287XFD6;A0A287KUQ5;A0A446YQM4;A0A287XFG9;A0A446XR57;A0A446NEE5;A0A446PPL8;M0Y9N1;A0A446YQ…	128
24.1558399200439	24.5330791473389	23.0538864135742	22.8282203674316	22.7638473510742	22.5101261138916	23.3537712097168	22.7366352081299	23.3702945709229	1	1	1	4.2	4.2	4.2	33.978	0	6.3894	0	14	0	F2EA82;A0A446WPK2;A0A446VRU9;A0A3B6NTU6;A0A3B6QMU4;A0A287V0C8;A0A287UZW7	F2EA82;A0A446WPK2;A0A446VRU9;A0A3B6NTU6;A0A3B6QMU4;A0A287V0C8;A0A287UZW7	169
24.2841854095459	23.2996292114258	22.3573036193848	21.9641704559326	23.228759765625	23.1698799133301	24.0372524261475	26.8719711303711	22.8215789794922	9	5	2	68.4	42.1	14.3	14.605	0	29.617	567910000	14	10	A0A446JYZ4;A0A3B5YXU6;A0A446JZ15	A0A446JYZ4;A0A3B5YXU6;A0A446JZ15	230
23.1040916442871	23.5633964538574	23.3170833587646	23.7939491271973	22.7279510498047	23.2722282409668	22.7444858551025	23.0578498840332	22.241247177124	2	2	1	15.5	15.5	6.8	22.369	0	12.097	85808000	14	9	A0A446LVH3;T1MEJ3;A0A446KKH1;A0A446LVG2;A0A446LVH9;A0A3B6BZD8;A0A446KKB3;A0A3B6D6J5;A0A446LVF4;A0A446LVJ5;A0A446KKB6;A0A3B6AR02	A0A446LVH3;T1MEJ3;A0A446KKH1;A0A446LVG2;A0A446LVH9;A0A3B6BZD8;A0A446KKB3;A0A3B6D6J5;A0A446LVF4;A0A446LVJ5;A0A446KKB6;A0A3B6AR02	246
24.387825012207	24.5588245391846	24.4757442474365	23.2866287231445	22.8589477539063	24.5291004180908	22.3990688323975	24.9777984619141	23.4772758483887	4	4	4	32.6	32.6	32.6	24.761	0	23.761	218460000	14	14	F2DK64;A0A446MGG0;A0A3B6C8P4;Q43209;A0A3B6DIX5;A0A287INX5;A0A3B6DGC8;M0VMU5;M0VMU6;A0A446MG06;A0A446L7E6;A0A287IP27;A0A3B6AZM5;A0A446L763;A0A287INV7	F2DK64;A0A446MGG0;A0A3B6C8P4;Q43209;A0A3B6DIX5;A0A287INX5;A0A3B6DGC8;M0VMU5;M0VMU6;A0A446MG06;A0A446L7E6;A0A287IP27;A0A3B6AZM5	269
23.2838821411133	23.3585548400879	23.7439842224121	22.736743927002	22.7650909423828	24.0530338287354	21.7773265838623	22.6164855957031	23.2444038391113	3	3	3	27.2	27.2	27.2	16.233	0	17.508	453590000	14	3	A0A3B6EEW7;A0A446N5G1;A0A446PEB7;A0A446N5I9;A0A446J526;A0A446TEH3;A0A3B6A0M7;F2E328;P05621;M7YQF7;F2DP48;M7YXG7;A0A3B6IS67;A0A3B6HS27;A0A3B6C7J8;A0A446QS22;A0A3B5ZWW7;A0A446TW74;A0A3B5ZWS6;A0A446K3K9;A0A446ME49;A0A3B6ILN3;A0A3B6KPG5;A0A3B6LRT8;A0A3B6PRX5;A0A446RSP3;P27807;F2EGK6;A0A446ULY6;A0A2X0TX35;A0A3B6GN50;A0A341P2T8;A0A446SD70;A0A3B5Y1R1;A0A446R7T2;A0A446L5F6;A0A3B5Z181;A0A3B5Y2Y0;F2EGR2;A0…	A0A3B6EEW7;A0A446N5G1;A0A446PEB7;A0A446N5I9;A0A446J526;A0A446TEH3;A0A3B6A0M7;F2E328;P05621;M7YQF7;F2DP48;M7YXG7;A0A3B6IS67;A0A3B6HS27;A0A3B6C7J8;A0A446QS22;A0A3B5ZWW7;A0A446TW74;A0A3B5ZWS6;A0A446K3K9;A0A446ME49;A0A3B6ILN3;A0A3B6KPG5;A0A3B6LRT8;A0A3B6PRX5;A0A446RSP3;P27807;F2EGK6;A0A446ULY6;A0A2X0TX35;A0A3B6GN50;A0A341P2T8;A0A446SD70;A0A3B5Y1R1;A0A446R7T2;A0A446L5F6;A0A3B5Z181;A0A3B5Y2Y0;F2EGR2;A0…	282
23.1547775268555	23.5458660125732	22.4498176574707	23.5762176513672	23.3962936401367	23.3075180053711	23.8692436218262	22.7566566467285	23.4663410186768	1	1	1	10.1	10.1	10.1	16.795	0	6.5815	22102000	14	4	A0A446RWR6;A0A446R4N2;A0A3B6JFF8;A0A3B6IQU3;A0A3B6HUX0;M7ZEH7;A0A446RWL2;A0A446R4M5;A0A3B6JG64;A0A3B6INB6;A0A3B6HWH7	A0A446RWR6;A0A446R4N2;A0A3B6JFF8;A0A3B6IQU3;A0A3B6HUX0;M7ZEH7;A0A446RWL2;A0A446R4M5;A0A3B6JG64;A0A3B6INB6;A0A3B6HWH7	318
23.681604385376	23.0902805328369	29.3006210327148	28.1031455993652	27.7482318878174	30.86008644104	23.4686107635498	22.8189582824707	23.2894077301025	11	5	3	66.3	47.5	33.7	22.716	0	31.064	6322800000	14	17	D2TE73;Q7Y1Z2;D3KVP5;A0A446S6B8;A0A3B6IQ78;A0A446S6C2;A0A446S6C1;A0A446S6C4;A0A3B6IRR8	D2TE73;Q7Y1Z2;D3KVP5;A0A446S6B8;A0A3B6IQ78;A0A446S6C2;A0A446S6C1;A0A446S6C4;A0A3B6IRR8	337
23.4312591552734	23.2449760437012	23.9649257659912	22.45969581604	22.3019199371338	23.5231914520264	26.9845714569092	27.15797996521	27.5273857116699	10	7	6	62.5	41	33.3	16.227	0	43.561	1685800000	14	24	A0A446SBL4;A0A3B6ITU0	A0A446SBL4;A0A3B6ITU0	345
23.3080139160156	23.221773147583	23.163911819458	22.7616138458252	23.4571228027344	23.661169052124	22.7445507049561	23.131534576416	23.0747947692871	1	1	1	17.3	17.3	17.3	23.257	0	6.6753	14977000	14	2	A0A446URQ1;A0A3B6LV14;A0A3B6LTT9	A0A446URQ1;A0A3B6LV14;A0A3B6LTT9	390
23.466007232666	22.5975227355957	23.4556179046631	23.1542282104492	22.3094825744629	24.0184211730957	22.6657867431641	23.4928016662598	23.4454612731934	2	2	2	22	22	22	19.744	0	11.6	82034000	14	1	A0A446UY82;A0A3B6LYU2	A0A446UY82;A0A3B6LYU2	400
24.8438835144043	24.2896842956543	23.2798862457275	24.5071830749512	24.586462020874	24.0236911773682	25.2714195251465	25.5575695037842	24.4940128326416	6	2	2	61	35.7	35.7	28.313	0	18.603	441810000	14	29	A0A3B6RL18;A0A446XK97;M8ADF8	A0A3B6RL18;A0A446XK97	440
23.4807453155518	22.4758052825928	23.022066116333	23.6722354888916	23.2783126831055	23.9309711456299	21.6889324188232	24.481502532959	23.569263458252	3	3	1	12.7	12.7	3.2	38.252	0	17.999	53976000	14	5	A0A446Y8Y8;A0A446Y8X3;A0A3B6SH44;A0A446Y902;A0A3B6SBV3;A0A446Y8Y0;A0A287W7J8;A0A287W7I5;F2DUJ6;F2DQX5;A0A287W7J1;A0A287W7N7;A0A287W8D4	A0A446Y8Y8;A0A446Y8X3;A0A3B6SH44;A0A446Y902;A0A3B6SBV3;A0A446Y8Y0;A0A287W7J8;A0A287W7I5;F2DUJ6;F2DQX5	444
25.6152095794678	25.4742603302002	25.4647274017334	25.0834274291992	25.4335498809814	24.9022846221924	26.9142208099365	26.7548084259033	26.7516193389893	7	7	3	66.5	66.5	41.1	28.088	0	50.634	1650100000	14	71	A0A446YKS7;A0A3B6SF94;A0A3B6SH42;F2DNE8;A0A287X3C2;A0A287X305;F2E7Q3;A0A3B6TU18	A0A446YKS7;A0A3B6SF94;A0A3B6SH42;F2DNE8	445
28.7106304168701	28.7244243621826	28.4792728424072	28.3161373138428	28.6455726623535	28.3393878936768	30.0867671966553	30.1541213989258	30.3408527374268	12	12	0	61.7	61.7	0	16.732	0	72.375	7866800000	14	67	A0A446J0E8;A0A446J068;Q02400;F2EG29;A0A287FU82	A0A446J0E8;A0A446J068;Q02400;F2EG29	469
23.6085052490234	24.1723518371582	24.4306201934814	22.6549892425537	23.6112518310547	23.7569389343262	22.1663608551025	23.5148315429688	23.7313957214355	3	3	3	36.8	36.8	36.8	18.379	0	17.642	327230000	14	1	Q93XQ6;A0A446W1T7;Q6JIB9;A0A446W1T8;A0A3B6PI67;Q94F69;Q93W25;A7LM55;A0A446V3Y0;A0A287TCL5;A0A287TCE0;A0A287TCB3	Q93XQ6;A0A446W1T7;Q6JIB9;A0A446W1T8;A0A3B6PI67;Q94F69;Q93W25;A7LM55;A0A446V3Y0;A0A287TCL5;A0A287TCE0	532
23.7889785766602	23.4824295043945	24.2924175262451	23.1087856292725	23.6378688812256	22.7439231872559	22.8825092315674	23.1583118438721	22.9732913970947	6	2	1	45.5	18	10.9	28.217	0	13.598	328090000	14	3	Q4Z8L8;Q4Z8L7;M7YBY6;A0A446XZN5;P23951;Q9M3Q9;Q9M3Q8;Q9M3Q1	Q4Z8L8;Q4Z8L7;M7YBY6;A0A446XZN5;P23951	538
28.3228549957275	28.2050380706787	28.4947643280029	28.6614265441895	29.0128650665283	28.7044448852539	26.1573448181152	25.8869743347168	25.9818744659424	11	11	3	67.2	67.2	15.6	19.633	0	65.108	6265900000	14	96	P16347;A0A3B6C9V8	P16347;A0A3B6C9V8	576
27.3681964874268	27.3713569641113	26.7668609619141	27.3733501434326	22.3306083679199	23.0429210662842	23.1705684661865	23.4997730255127	23.5472259521484	6	2	2	19	9.8	9.8	75.7	0	18.391	1482200000	14	12	Q03871;W6AX70;V9TP40;U5YQV1;A0A2L1K3K6;Q52JL2;Q84UY5;A0A4Y5P868;Q84TG6;Q0Q5D8;Q6UJY7;A0A5B9C0L3;A5HMG2;W6AWK6;V9TSK8;Q94IJ6	Q03871;W6AX70;V9TP40;U5YQV1;A0A2L1K3K6;Q52JL2;Q84UY5;A0A4Y5P868;Q84TG6;Q0Q5D8;Q6UJY7;A0A5B9C0L3;A5HMG2;W6AWK6;V9TSK8;Q94IJ6	581
26.1949214935303	23.2361602783203	25.9667091369629	23.485034942627	22.5508346557617	22.9949188232422	28.4643135070801	22.8527431488037	23.9597244262695	8	2	0	52.9	13.3	0	23.598	0	14.654	966150000	14	14	Q8S4P7	Q8S4P7	593
23.5014305114746	23.3314342498779	22.8903007507324	23.1534862518311	23.3147296905518	22.3113136291504	23.2605724334717	23.2640399932861	23.4292869567871	1	1	1	4.5	4.5	4.5	23.722	0.0034072	6.3515	53505000	13	5	A0A446PFH0;A0A446N5N6;A0A077RSY3	A0A446PFH0;A0A446N5N6;A0A077RSY3	12
29.1374111175537	29.2521896362305	28.9791011810303	28.9376983642578	29.0299167633057	29.0912628173828	26.9153594970703	28.5900650024414	28.0969276428223	7	7	2	41.7	41.7	16	20.971	0	44.439	5493800000	13	58	A0A446Q2U2;A0A287LU91;A0A287LU93;A0A3B6FRP4;A0A446NSQ3;A0A3B6EL73;A0A3B6GX61;A0A446Q2P7;A0A3B6FV16;A0A287LU98;A0A446NSV2;A0A649YA04;A0A077RW85;A0A446Q2P4;A0A287KUL6;A0A446Q316;A0A446NSR2;P93603;A0A3B6FVL7;A0A3B6EEM0;A0A446NE34;A0A3B6GVG4;A0A3B6FPD8;A0A446PPH3;A0A446NSR3;M0VGX7;F2E7M2;A0A287LUA8	A0A446Q2U2;A0A287LU91;A0A287LU93;A0A3B6FRP4;A0A446NSQ3;A0A3B6EL73;A0A3B6GX61;A0A446Q2P7;A0A3B6FV16;A0A287LU98;A0A446NSV2;A0A649YA04;A0A077RW85;A0A446Q2P4;A0A287KUL6;A0A446Q316;A0A446NSR2;P93603;A0A3B6FVL7;A0A3B6EEM0;A0A446NE34;A0A3B6GVG4;A0A3B6FPD8;A0A446PPH3;A0A446NSR3;M0VGX7;F2E7M2	18
28.4855041503906	29.0833206176758	29.0056838989258	28.996768951416	28.7390842437744	28.8915996551514	27.8085765838623	27.7497673034668	27.5397872924805	7	7	3	48	48	18.7	16.646	0	42.074	5917900000	13	89	F2CXV3;A0A0U2LJC8	F2CXV3;A0A0U2LJC8	53
24.2309494018555	22.7879161834717	22.831521987915	23.601734161377	24.324125289917	23.7948226928711	22.4150829315186	23.6405181884766	23.1081886291504	1	1	1	25.4	25.4	25.4	21.336	0	8.4476	99066000	13	5	A0A446K633;A0A287G0K8;M7ZDA2;F2DBD5;A0A3B5Y460;A0A287G0K7;A0A1D5SGL2;A0A287G0L0;A0A287G0K9	A0A446K633;A0A287G0K8;M7ZDA2;F2DBD5;A0A3B5Y460;A0A287G0K7;A0A1D5SGL2;A0A287G0L0;A0A287G0K9	59
23.7427368164063	23.4370613098145	23.3317947387695	21.8802051544189	23.3086528778076	24.0659866333008	23.9725284576416	23.3672313690186	24.7466049194336	2	2	2	18.3	18.3	18.3	16.876	0	12.14	23953000	13	5	A0A287F871;A0A287F826;M0UZA5;A0A446JT30;A0A3B5ZS22;A0A446JSY6;A0A287F838;A0A446ITK9;A0A446ITM3;A0A3B5XY56;A0A3B5YWQ4;A0A3B5XY69;A0A287F824	A0A287F871;A0A287F826;M0UZA5;A0A446JT30;A0A3B5ZS22;A0A446JSY6;A0A287F838;A0A446ITK9;A0A446ITM3;A0A3B5XY56;A0A3B5YWQ4;A0A3B5XY69;A0A287F824	101
23.4006309509277	23.9603595733643	23.4344215393066	22.4801654815674	22.3958320617676	22.8024368286133	23.5025291442871	22.6892719268799	23.544116973877	1	1	1	9.8	9.8	9.8	14.713	0	6.9284	0	13	1	A0A287IYI7;F2CW93;C1K737;A0A446LB07;A0A287IYP0;M0UK14	A0A287IYI7;F2CW93;C1K737;A0A446LB07;A0A287IYP0;M0UK14	118
24.8762855529785	25.3731517791748	23.7830467224121	24.9492683410645	24.1229076385498	23.4656200408936	23.9360866546631	23.5483512878418	22.7022247314453	3	3	3	24.7	24.7	24.7	21.227	0	17.819	333290000	13	17	A0A446NM21;A0A446PXC0;W5D4F5;F2DSU6;A0A446PXL1;A0A446NM78;A0A446NLX8;A0A446NLW4;A0A446PWR5;A0A446PWR7;A0A287LBR8;A0A446NM42;M7YV64;A0A446PXK7;A0A3B6EHK7;A0A446PWR8;A0A287LBV2;A0A446NLW5	A0A446NM21;A0A446PXC0;W5D4F5;F2DSU6;A0A446PXL1;A0A446NM78;A0A446NLX8;A0A446NLW4;A0A446PWR5;A0A446PWR7;A0A287LBR8;A0A446NM42;M7YV64;A0A446PXK7;A0A3B6EHK7;A0A446PWR8;A0A287LBV2;A0A446NLW5	130
23.712215423584	24.5802612304688	23.9402713775635	23.6825981140137	23.4808235168457	22.3617401123047	22.3160572052002	22.5752239227295	22.6757659912109	1	1	1	10.5	10.5	10.5	16.64	0	7.3518	39910000	13	14	A0A287R814;A0A287R7P2;W5FWF5;M7Y6X6;F2E598;A0A446U676;A0A287R862;A0A287R867;A0A287R7R1;A0A287R7P8;A0A446U680;A0A446T0T8;A0A3B6LKZ9;A0A3B6KHQ4;A0A287R807	A0A287R814;A0A287R7P2;W5FWF5;M7Y6X6;F2E598;A0A446U676;A0A287R862;A0A287R867;A0A287R7R1;A0A287R7P8;A0A446U680;A0A446T0T8;A0A3B6LKZ9;A0A3B6KHQ4;A0A287R807	148
23.5096035003662	23.567253112793	23.7679405212402	23.4823741912842	24.2601356506348	23.0433826446533	23.7628078460693	23.1492347717285	22.4761695861816	1	1	1	11.4	11.4	11.4	20.904	0	6.8883	8812800	13	1	A0A287V609;A0A287V618;A0A287V6D0;A0A287V5Y6;A0A287V5Y0;A0A446WSK9;A0A446WSQ1;D2KZ12;F2CXK6;A0A446WSK5;A0A3B6PSZ6;A0A287V5X7;A0A446WSM0;A0A446WSK2	A0A287V609;A0A287V618;A0A287V6D0;A0A287V5Y6;A0A287V5Y0;A0A446WSK9;A0A446WSQ1;D2KZ12;F2CXK6;A0A446WSK5;A0A3B6PSZ6;A0A287V5X7;A0A446WSM0;A0A446WSK2	172
22.8589038848877	25.3328914642334	25.8323154449463	26.0094318389893	23.7965888977051	25.9721546173096	23.3592491149902	23.1934719085693	22.9810218811035	5	2	1	39.1	19.9	10.6	16.704	0	6.8089	499010000	13	12	A0A3B5ZWB5	A0A3B5ZWB5	242
28.128490447998	28.3314666748047	28.3733921051025	28.2015361785889	28.5464992523193	28.2096462249756	27.6881923675537	27.5858459472656	29.0557422637939	11	11	4	65	65	37.2	25.043	0	68.786	7040000000	13	98	A0A446QTL3;A0A3B6HU03;M7Z222;A0A446QTM9;A0A3B6HSI5;A0A446QTJ8;A0A3B6HQF0;A0A446QTL6;A0A3B6HUV4;A0A446QTK1	A0A446QTL3;A0A3B6HU03;M7Z222;A0A446QTM9;A0A3B6HSI5;A0A446QTJ8;A0A3B6HQF0;A0A446QTL6;A0A3B6HUV4;A0A446QTK1	316
24.9590759277344	24.4958953857422	25.1966686248779	25.1718063354492	25.5996017456055	25.3775596618652	23.3864192962646	24.6414413452148	23.3189582824707	11	5	5	62.9	38.9	38.9	25.153	0	30.557	314970000	13	24	A0A3B6JL06;A0A3B6JLE2	A0A3B6JL06;A0A3B6JLE2	354
25.7588024139404	25.5183639526367	25.4999656677246	25.4470157623291	25.5322551727295	25.3055305480957	26.1782608032227	26.058666229248	25.6115264892578	7	7	7	33.6	33.6	33.6	24.806	0	44.019	900570000	13	50	A0A3B6KHW7;A0A446UC53;A0A3B6MSX6;A0A3B6LNG6;M8ARL1;A0A3B6KKC0;M8AVQ8;A0A446T4Q7;F2DJC5;A0A287RNR0	A0A3B6KHW7;A0A446UC53;A0A3B6MSX6;A0A3B6LNG6;M8ARL1;A0A3B6KKC0;M8AVQ8;A0A446T4Q7;F2DJC5	362
22.530366897583	23.5727138519287	23.7588310241699	22.3539524078369	23.2365875244141	23.1590385437012	23.2526760101318	22.4152412414551	23.8350620269775	3	3	2	26.5	26.5	22.7	24.226	0	18.727	80909000	13	2	A0A3B6KRG8;A0A446TJ64;Q9SWU2;M7ZXJ0;Q9SWU3;A0A3B6KRY4;Q9XHL8;A0A3B6MYB6;A0A446TJG3;A0A446TJ51;Q9SWU1;P27806;A0A446UR98;A0A446URD8;A0A446URB1;A0A3B6KR72;A0A287SMG1;O65795;O65794;A0A287SM79;A0A287SMG3;A0A3B6MZC2;A0A446URB8;A0A3B6LV22;A0A287SMD8;A0A446URC7;A0A287SMJ2;Q9XHL9;A0A287SMG9;F2DXK0;A0A287SML4;A0A446URD2;A0A287SMB0;A0A3B6N111;A0A287SMA1;A0A446URE8;F2D621;A0A446URB5;A0A287SMD0;A0A287SMK1;A0A…	A0A3B6KRG8;A0A446TJ64;Q9SWU2;M7ZXJ0;Q9SWU3;A0A3B6KRY4;Q9XHL8;A0A3B6MYB6;A0A446TJG3;A0A446TJ51;Q9SWU1;P27806;A0A446UR98;A0A446URD8;A0A446URB1	374
23.5713844299316	23.5230503082275	23.8041439056396	24.0890865325928	22.9095821380615	23.3319683074951	23.4705848693848	23.5327835083008	22.8521957397461	3	3	3	25.2	25.2	25.2	14.441	0	17.347	20550000	13	3	A0A446U6G9;A0A3B6LKU8;A0A446U6L5;A0A446T101;A0A3B6KH65;A0A3B6MQK1	A0A446U6G9;A0A3B6LKU8;A0A446U6L5;A0A446T101;A0A3B6KH65	381
23.5431098937988	24.1193790435791	23.7800350189209	23.087158203125	23.5434112548828	23.4127750396729	23.5450305938721	22.5211849212646	23.4908561706543	2	2	2	21.6	21.6	21.6	17.664	0	11.789	98166000	13	0	A0A3B6NKE4	A0A3B6NKE4	406
23.5362358093262	24.2209091186523	24.048454284668	22.8279857635498	22.9343967437744	23.5881404876709	23.3915939331055	23.7430610656738	23.3853797912598	2	2	1	20.5	20.5	9.8	14.542	0	11.921	40764000	13	4	A0A446VJB0;M7Z967;A0A446VJ57;A0A3B6NRZ2;A0A3B6QG49;A0A3B6QGD5	A0A446VJB0;M7Z967;A0A446VJ57;A0A3B6NRZ2;A0A3B6QG49;A0A3B6QGD5	413
23.5417308807373	23.7557811737061	22.984245300293	23.2034606933594	23.8140640258789	24.4847545623779	22.6327152252197	21.8583450317383	22.7732105255127	2	1	1	20.5	9.8	9.8	14.555	0	6.8255	0	13	1	A0A446WGX0;A0A3B6PPQ6;A0A446WGR1;A0A3B6PLK1	A0A446WGX0;A0A3B6PPQ6;A0A446WGR1;A0A3B6PLK1	422
23.4897022247314	23.2564392089844	22.8030490875244	23.1641712188721	22.9365386962891	22.9825897216797	23.7412204742432	23.5288314819336	21.9019470214844	8	2	1	41.8	13.3	7.1	23.586	0	12.104	1592800000	13	0	A0A3B6SNK2	A0A3B6SNK2	450
24.2611694335938	24.0249156951904	22.7565650939941	24.1068000793457	24.3026695251465	23.2675132751465	22.7942810058594	22.6200256347656	22.9401054382324	14	1	1	63.8	8.7	8.7	23.936	0	7.7494	0	13	0	A0A446KQF8;M7Z628;P52572;A0A446KQA5;A0A3B6DBZ8;D0PRB4;A0A287HGF8;A0A446KQF3	A0A446KQF8;M7Z628;P52572;A0A446KQA5;A0A3B6DBZ8;D0PRB4;A0A287HGF8	483
26.9139919281006	27.1211948394775	26.2543258666992	24.0988922119141	24.2819557189941	22.2310733795166	27.535120010376	22.8966655731201	23.3065738677979	5	5	4	43.5	43.5	31.7	17.362	0	31.399	1313400000	13	28	Q3S4I1;Q3S4I0;A0A446L0A6;A0A446M9K8;Q3S4H9;M0UL57;A0A446L0A7;A0A446L0A5;A0A287I6S8;A0A287I6M6;M7ZIN5;A0A446M2N6;A0A3B6AUB6;A0A446M3A8;A0A446M300;A0A3B6C5L4	Q3S4I1;Q3S4I0;A0A446L0A6;A0A446M9K8;Q3S4H9;M0UL57;A0A446L0A7;A0A446L0A5;A0A287I6S8	484
23.7237586975098	23.1074695587158	23.4644412994385	23.0770530700684	23.1640892028809	23.3287124633789	25.3066082000732	25.3493537902832	23.7641487121582	15	3	2	75.2	36.2	23.9	23.983	0	18.319	154100000	13	9	A0A446M0K7	A0A446M0K7	487
23.3704357147217	23.7327613830566	23.9843425750732	24.0163631439209	23.3053016662598	23.2368259429932	22.7601642608643	22.3580493927002	22.8695869445801	3	3	3	29.9	29.9	29.9	18.712	0	17.969	2096900000	13	2	A0A446MZQ9;A0A3B6GPH9	A0A446MZQ9	490
24.5543613433838	23.8265113830566	23.3453464508057	22.8452033996582	23.0802631378174	23.5678482055664	22.0990505218506	22.2397480010986	23.522554397583	2	2	2	22.9	22.9	22.9	16.427	0	11.808	24122000	13	1	A0A446P083;M8AKN2;A0A3B6EN15	A0A446P083;M8AKN2;A0A3B6EN15	495
23.7041511535645	23.3580856323242	23.4352054595947	23.0032482147217	24.0067329406738	23.4368515014648	22.1777439117432	23.5820713043213	23.1248970031738	1	1	1	4.2	4.2	4.2	25.018	0	6.4205	9151700	13	2	A0A446QBX5	A0A446QBX5	501
24.0050754547119	23.0725269317627	23.9576168060303	23.0122909545898	23.067008972168	23.9530925750732	24.0159435272217	23.5261001586914	23.6120357513428	1	1	1	4.3	4.3	4.3	23.109	0.0017065	6.3576	5786000	13	0	A0A446R9A9	A0A446R9A9	506
31.7097282409668	24.327018737793	32.4350471496582	32.5960159301758	32.9714126586914	32.753719329834	33.7077941894531	33.8269538879395	33.0962715148926	11	11	2	75.6	75.6	33.9	18.274	0	117.1	123080000000	13	179	A0A7H1K1W0;A0A7H1K1W2;P17314;Q53YX8;Q6S5B1;A0A7H1K1V9;A0A1S6KXP9;A0A7H1K1X1;A0A7H1K1V2;A0A7H1K1X3;A0A7H1K1W1;A0A7H1K1X2;A0A7H1K1W8;A0A7H1K1W6;A0A7H1K1W3;A0A7H1K1V8;A0A7H1K1W4;A0A7H1K1V5;A0A7H1K1W5;A0A7H1K1V1;A0A7H1K1W7;O23982;O24000	A0A7H1K1W0;A0A7H1K1W2;P17314;Q53YX8;Q6S5B1;A0A7H1K1V9;A0A1S6KXP9;A0A7H1K1X1;A0A7H1K1V2;A0A7H1K1X3;A0A7H1K1W1;A0A7H1K1X2;A0A7H1K1W8;A0A7H1K1W6;A0A7H1K1W3;A0A7H1K1V8;A0A7H1K1W4;A0A7H1K1V5;A0A7H1K1W5;A0A7H1K1V1;A0A7H1K1W7	547
29.4610195159912	30.0988616943359	23.375280380249	29.6205711364746	30.0480422973633	30.3189392089844	29.6536750793457	30.0490818023682	30.4184036254883	10	10	1	55.2	55.2	9.8	16.098	0	63.971	10436000000	13	52	A0A7H1K1Z1;A0A7H1K1Z4;A0A7H1K1Z3;A0A446QN17;A0A7H1K1Z0;A0A4V1DXH0;A0A7H1K1Z2;A0A7H1K1Y9;M8A1S2	A0A7H1K1Z1;A0A7H1K1Z4;A0A7H1K1Z3;A0A446QN17;A0A7H1K1Z0;A0A4V1DXH0;A0A7H1K1Z2;A0A7H1K1Y9	548
23.5453758239746	23.2452239990234	22.5168952941895	23.8262462615967	22.3703556060791	22.1635894775391	28.9290866851807	29.3554611206055	28.5303287506104	10	5	4	59	31.9	31.9	25	0	32.547	7696700000	13	18	Q6RS99;Q0Q5E3;H9XH65;Q7XYC3;A0A287FYQ5;F2EJF0	Q6RS99;Q0Q5E3;H9XH65;Q7XYC3	568
25.6012477874756	25.4980487823486	22.8878688812256	22.4321708679199	23.0460071563721	25.5927486419678	23.472412109375	22.2452659606934	23.0213966369629	3	3	3	50	50	50	10.928	0	17.871	269480000	12	10	A0A446KQ88;A0A1D5UUP9;A0A446M053;A0A446M0D5;A0A287HFL1;A0A287HFT5;F2DB07;A0A287HFV4	A0A446KQ88;A0A1D5UUP9;A0A446M053;A0A446M0D5	67
24.567310333252	22.3443298339844	23.6778125762939	23.1496047973633	23.4281444549561	23.3427200317383	23.0352001190186	25.228588104248	21.9954299926758	4	3	2	6.9	5.2	3.6	80.409	0	17.78	65524000	12	3	Q84LE9;A0A287G115;F2EA67;I6SW23;I6SW34;I6TRS8;Q40054;A0A287FYQ0;A0A287FYP1;A0A287G127;Q40045;A0A1D8V7B9;A0A1D8V7C2;A0A1D8V7B4;A0A1D8V7B3;A0A1D8V7B8;A0A1D8V7E5;A0A1D8V7D6;A0A1D8V7E1	Q84LE9;A0A287G115;F2EA67;I6SW23;I6SW34;I6TRS8;Q40054;A0A287FYQ0;A0A287FYP1;A0A287G127;Q40045;A0A1D8V7B9;A0A1D8V7C2;A0A1D8V7B4;A0A1D8V7B3;A0A1D8V7B8;A0A1D8V7E5;A0A1D8V7D6;A0A1D8V7E1	108
23.578706741333	23.8643550872803	23.06809425354	23.1147804260254	23.0037727355957	22.3078289031982	23.0632705688477	23.8536472320557	22.7230262756348	2	2	2	10.5	10.5	10.5	16.026	0	13.091	114710000	12	6	A9YPI9;A9YPJ7;H6UET5;H6UET4;Q5IUH9;Q5IUH3;Q5IUH1;Q5URW6;Q5IUJ5;Q5IUG1;Q5IUF1;Q5IU18;Q56GB1;Q9M4E4;Q4VUG5;Q9AQX9;Q9SC07;Q7FNZ4;Q9AVP9;A9YPJ6;A9YPI8;A9YPJ0;B6RRC5;D7F5K8;F8SWN7;Q5IUI3;Q5IUI7;Q9FSI9;G1UH18;G1UH25;A9YPK2;A9XGB2;A9XGB3;A9XGB5;A9XGB6;A9XGB7;A9XGC1;A9XGC3;A9XGC4;A0A287Q5R6;G1UH21;G1UH41;G1UH20;G1UH19;G1UH17;D7PC75;B3Y675;G1UH27;A0A3F2YAL5;G1UH26;G1UH23;G1UH16	A9YPI9;A9YPJ7;H6UET5;H6UET4;Q5IUH9;Q5IUH3;Q5IUH1;Q5URW6;Q5IUJ5;Q5IUG1;Q5IUF1;Q5IU18;Q56GB1;Q9M4E4;Q4VUG5;Q9AQX9;Q9SC07;Q7FNZ4;Q9AVP9;A9YPJ6;A9YPI8;A9YPJ0;B6RRC5;D7F5K8;F8SWN7;Q5IUI3;Q5IUI7;Q9FSI9;G1UH18;G1UH25;A9YPK2;A9XGB2;A9XGB3;A9XGB5;A9XGB6;A9XGB7;A9XGC1;A9XGC3;A9XGC4;A0A287Q5R6;G1UH21;G1UH41;G1UH20;G1UH19;G1UH17;D7PC75;B3Y675;G1UH27;A0A3F2YAL5;G1UH26;G1UH23;G1UH16	142
24.7898731231689	24.1181831359863	22.9126644134521	23.8034572601318	24.1542320251465	22.5527534484863	22.3772430419922	22.84938621521	21.4653759002686	1	1	1	4.9	4.9	4.9	26.31	0	6.7923	0	12	0	A0A287V2S6;A0A287V373	A0A287V2S6;A0A287V373	171
24.3941059112549	23.7587757110596	23.5582389831543	24.4472026824951	23.1532363891602	22.4271011352539	22.6651268005371	22.7136478424072	23.8337516784668	1	1	1	19.8	19.8	19.8	23.945	0	7.1431	42697000	12	5	A0A446JLI3;A0A446IM27;M7ZIQ2;A0A446JLI9;A0A446IM41;A0A3B5XV82	A0A446JLI3;A0A446IM27;M7ZIQ2;A0A446JLI9;A0A446IM41;A0A3B5XV82	193
24.2272129058838	23.4591045379639	24.0603942871094	23.6813449859619	23.5135345458984	22.2508087158203	22.5189838409424	22.2759227752686	23.2513732910156	2	2	2	15.4	15.4	15.4	19.936	0	11.611	49366000	12	3	A0A3B5Y392;A0A446K4A0;A0A3B5Z083	A0A3B5Y392;A0A446K4A0;A0A3B5Z083	207
23.530834197998	23.6329116821289	23.7040882110596	24.2534618377686	24.1168594360352	22.2327461242676	23.6852054595947	23.1314926147461	20.9593391418457	3	3	3	16.3	16.3	16.3	19.929	0	18.029	100000000	12	5	A0A446K8C9;A0A446J8Z9;A0A3B5ZZ39;A0A3B5Z2H6;A0A3B5Y536;A0A287GHA3;A0A287GH99	A0A446K8C9;A0A446J8Z9;A0A3B5ZZ39;A0A3B5Z2H6;A0A3B5Y536;A0A287GHA3;A0A287GH99	213
23.1133842468262	24.0335922241211	24.3933982849121	23.1924228668213	23.1072273254395	21.5735950469971	23.1294269561768	23.3887195587158	22.6310749053955	3	1	1	32.4	10.3	10.3	15.912	0	7.0651	0	12	2	A0A3B5Y6R3;A0A446JDM7;A0A446JDM9;A0A446JDP3;F2EE96	A0A3B5Y6R3;A0A446JDM7;A0A446JDM9;A0A446JDP3;F2EE96	216
22.8064155578613	24.0077590942383	23.1728382110596	24.0785999298096	22.0250930786133	22.9873447418213	22.7323780059814	22.5828342437744	22.8485012054443	4	4	2	40	40	17.9	15.881	0	23.547	225230000	12	5	A0A3B5Z581;A0A3B6A1L0;A0A446KD82;A0A446KD90;A0A446KDB4	A0A3B5Z581;A0A3B6A1L0;A0A446KD82;A0A446KD90;A0A446KDB4	237
25.9047431945801	25.6759986877441	25.6541156768799	25.6421546936035	25.4960689544678	25.1654186248779	26.1769123077393	26.0696258544922	26.1778812408447	2	2	2	14.7	14.7	14.7	20.412	0	12.199	663930000	12	38	A0A446LYU6;A0A446KNI8;A0A446KNJ2;P29546;A0A446LYM9;A0A446KNI2;A0A3B6DB70;A0A3B6C101;A0A3B6ATD7;A0A446LYQ7;A0A7H4LD45;A0A446LYN5;A0A446KNR5;M7Z011;A0A446LYV4;A0A446KNI7	A0A446LYU6;A0A446KNI8;A0A446KNJ2;P29546;A0A446LYM9;A0A446KNI2;A0A3B6DB70;A0A3B6C101;A0A3B6ATD7;A0A446LYQ7;A0A7H4LD45;A0A446LYN5;A0A446KNR5;M7Z011;A0A446LYV4;A0A446KNI7	250
23.8249759674072	23.8039321899414	21.8395614624023	22.6697673797607	23.9161491394043	23.6581611633301	25.0836124420166	23.7777290344238	22.8636474609375	2	2	2	30.5	30.5	30.5	24.52	0	12.252	91555000	12	2	A0A446KRX4;A0A446M1T3;A0A446KRY8;A0A446M202;A0A3B6AUH5;W5BMW7;A0A446M1W2;Q9M3U8;A0A287HKY8;A0A287HKY0;M0YVB7;A0A287HKK4;A0A446KRX5;A0A287HKP7;A0A3B6AVR8;A0A446KRY6;A0A446M234;M7ZA56	A0A446KRX4;A0A446M1T3;A0A446KRY8;A0A446M202;A0A3B6AUH5;W5BMW7;A0A446M1W2;Q9M3U8;A0A287HKY8;A0A287HKY0;M0YVB7;A0A287HKK4;A0A446KRX5;A0A287HKP7;A0A3B6AVR8;A0A446KRY6;A0A446M234;M7ZA56	253
26.5336208343506	23.4910259246826	26.0854949951172	23.4010009765625	26.4512825012207	26.4206466674805	22.9361820220947	23.3537292480469	22.5801486968994	7	7	7	32.8	32.8	32.8	33.691	0	42.805	1438500000	12	28	A0A3B6AYW9;A0A1D5UU14;A0A3B6C6W9;F2DIK1;A0A287IEH6;A0A287IEJ8;M7YGD8;A0A446L3F8;A0A446MCK6;A0A287IEJ4	A0A3B6AYW9;A0A1D5UU14;A0A3B6C6W9;F2DIK1;A0A287IEH6;A0A287IEJ8;M7YGD8;A0A446L3F8;A0A446MCK6	256
24.1128158569336	24.0847606658936	25.1676025390625	25.4455642700195	23.1132030487061	25.1323394775391	25.4568538665771	24.9428844451904	22.5315494537354	6	6	6	45.2	45.2	45.2	23.94	0	35.145	531260000	12	17	A0A446L5A3;A0A3B6B0K8;M7ZGK1;M0UGW6;A0A3B6DDW7;A0A287IJH1;A0A7H4LIT2;A0A446ME81;A0A3B6C7T5	A0A446L5A3;A0A3B6B0K8;M7ZGK1	257
22.8639831542969	23.2267990112305	24.4302711486816	22.6342868804932	23.5993919372559	23.0326499938965	25.3902454376221	25.8163623809814	23.5516262054443	4	4	2	50.9	50.9	32.5	12.576	0	24.041	273800000	12	9	A0A446NAA8;A0A3B6ECW9;M7YUG3;A0A446N9C1;A0A3B6GTS5;F2EFB1;A0A287KK42	A0A446NAA8;A0A3B6ECW9;M7YUG3;A0A446N9C1;A0A3B6GTS5;F2EFB1;A0A287KK42	279
23.3089141845703	23.4554691314697	22.9824924468994	22.8655700683594	22.8202514648438	23.7936420440674	22.6846542358398	23.0380573272705	23.6669330596924	3	3	3	21.2	21.2	21.2	16.272	0	18.633	133020000	12	11	W5CUW2;Q5CAQ2;M7Z7Q1;A0A6B9ZQF4;A0A446PKE6;A0A446NAT6;A0A3B6GU21;A0A3B6ED63;M0WI75	W5CUW2;Q5CAQ2;M7Z7Q1;A0A6B9ZQF4;A0A446PKE6;A0A446NAT6;A0A3B6GU21;A0A3B6ED63;M0WI75	280
24.4751777648926	23.3591823577881	22.941743850708	23.8256492614746	23.299165725708	22.9248600006104	22.9690780639648	22.0950450897217	24.2492084503174	2	2	2	21.6	21.6	21.6	17.255	0	11.767	37962000	12	5	A0A446PT82;F2D3T2;A0A446PT08;A0A446NHV2;A0A3B6GU40;A0A3B6FQK5;A0A3B6EGT2;A0A446PT33;M7ZPP8;A0A446NHR9;A0A446PT79;A0A446NI46;A0A077S1R3	A0A446PT82;F2D3T2;A0A446PT08;A0A446NHV2;A0A3B6GU40;A0A3B6FQK5;A0A3B6EGT2;A0A446PT33;M7ZPP8;A0A446NHR9;A0A446PT79;A0A446NI46;A0A077S1R3	284
22.3371696472168	23.4323043823242	23.6902103424072	24.4048957824707	24.0225505828857	23.9460124969482	23.6192970275879	22.4337921142578	22.7053146362305	2	2	2	8.3	8.3	8.3	23.589	0	11.791	17266000	12	2	A0A446PAE2;A0A3B6FHZ6;A0A446PAI2;A0A446PB57;A0A077RRW0	A0A446PAE2;A0A3B6FHZ6;A0A446PAI2;A0A446PB57;A0A077RRW0	294
23.5681495666504	24.3325443267822	22.9523906707764	22.4668636322021	22.8660926818848	23.4076728820801	24.0604381561279	23.2957954406738	22.9131965637207	3	3	3	17.1	17.1	17.1	18.643	0	18.97	606840000	12	20	A0A3B6GLF7;A0A3B6GM28;P09863;A0A446N289;A0A446N280;A0A446N216;A0A3B6EAS3;A0A446N210;A0A3B6EDE3;M8A6E3	A0A3B6GLF7;A0A3B6GM28	298
23.0967903137207	23.329553604126	23.9390144348145	24.3908386230469	23.2297019958496	22.7643013000488	22.7486839294434	23.994026184082	22.5429630279541	2	2	2	19.3	19.3	19.3	20.065	0	12.17	133450000	12	8	A0A446QPG3;A0A3B6HTI1	A0A446QPG3;A0A3B6HTI1	314
23.3888778686523	23.9357604980469	23.5296192169189	22.6241054534912	22.5392723083496	22.5498905181885	23.7700786590576	23.0070323944092	22.7122688293457	3	3	3	20	20	20	23.585	0	17.74	234680000	12	14	T1LJZ6;A0A3B6HXP8;A0A3B6JDF8;M8B053;A0A287MXL6;A0A446RPM4;A0A3B6IMS8;F2DNP3;M0W099;A0A287MXL7;T1LJZ7;Q946Y8	T1LJZ6;A0A3B6HXP8;A0A3B6JDF8;M8B053;A0A287MXL6;A0A446RPM4;A0A3B6IMS8;F2DNP3;M0W099	321
23.0434284210205	24.1622848510742	23.120569229126	22.4431781768799	23.053243637085	23.0302867889404	23.8335590362549	22.9727554321289	23.1187953948975	7	7	2	63	63	19.6	15.339	0	42.87	1580000000	12	11	A0A3B6IS82;A0A446S6Q2;A0A446S6P5	A0A3B6IS82;A0A446S6Q2	343
23.2524738311768	23.3520183563232	23.7056121826172	23.8343181610107	23.0495014190674	21.9246807098389	23.3630962371826	24.4671859741211	23.1615715026855	7	4	3	39.7	27.7	21.4	23.101	0	18.184	219470000	12	15	A0A446TTH0;A0A3B6LFE7;A0A446TTG1;F2EL01;A0A287Q894	A0A446TTH0;A0A3B6LFE7	379
24.2388916015625	22.4217834472656	23.5690689086914	23.115364074707	22.086389541626	23.633695602417	23.437520980835	23.3812274932861	23.9106140136719	2	2	2	15.3	15.3	15.3	16.303	0	11.629	13843000	12	2	W5I4R7;M7ZRR2;F2CZL7;A0A446YKU3;A0A446XKR1;A0A446XKF0;A0A3B6RH29;P47815	W5I4R7;M7ZRR2;F2CZL7;A0A446YKU3;A0A446XKR1;A0A446XKF0;A0A3B6RH29;P47815	435
22.7922534942627	24.8307399749756	23.3894901275635	23.3747730255127	22.1242923736572	23.8877964019775	27.4751415252686	27.5511283874512	27.9076461791992	7	7	5	46.1	46.1	40.1	17.764	0	42.319	1207700000	12	21	A0A446K4D5;Q8H0B8;A0A446J5U1;A0A3B5Y3D7;A0A3B5Z0I8;A0A446J5N5;A0A287GYW2;A0A287PEG5;A0A287PEK8;A0A287WNA1;A0A287PHE6;A0A287PI25;A0A287PFJ6;A0A287N9N2;A0A287PH13	A0A446K4D5;Q8H0B8;A0A446J5U1;A0A3B5Y3D7;A0A3B5Z0I8;A0A446J5N5	476
24.067289352417	23.540922164917	23.1530704498291	23.3511486053467	23.2906112670898	23.5991115570068	23.0599708557129	23.0758152008057	24.2202415466309	3	2	1	22.6	16.7	7.7	18.454	0	12.169	783330000	12	16	Q6UQ05;A0A446LCN6	Q6UQ05;A0A446LCN6	485
29.0979080200195	28.9704875946045	28.8582496643066	28.6669883728027	28.7885856628418	28.7505664825439	28.4486083984375	28.7598323822021	28.5650730133057	15	15	0	61.9	61.9	0	23.893	0	92.232	11005000000	12	150	Q9AXH7;Q6W8Q2	Q9AXH7;Q6W8Q2	592
23.7075386047363	22.7993030548096	23.3472232818604	23.1971855163574	23.7602577209473	24.1202659606934	24.7825183868408	24.7452983856201	24.8865566253662	4	4	4	22.5	22.5	22.5	16.084	0	24.17	349940000	11	23	A0A446TLE3;A0A1D5ZLT8;A0A0A7NVN8;F2DY31;M7YRR2;A0A446TLB6	A0A446TLE3;A0A1D5ZLT8;A0A0A7NVN8;F2DY31;M7YRR2;A0A446TLB6	33
23.3713130950928	23.2285823822021	24.1431541442871	22.5474529266357	23.0641250610352	22.3149375915527	24.3954620361328	22.8371925354004	22.9039688110352	2	2	2	19.1	19.1	19.1	20.075	0	11.83	51234000	11	3	A0A0M4FCG4;M8AJE3;A0A446M672;A0A446KW80;A0A3B6C4D7;A0A3B6AWD3;A0A1D6DET0	A0A0M4FCG4;M8AJE3;A0A446M672;A0A446KW80;A0A3B6C4D7;A0A3B6AWD3;A0A1D6DET0	48
23.0376510620117	23.8616638183594	22.8287868499756	23.6900043487549	22.8652687072754	23.0540752410889	24.0041027069092	23.5137634277344	22.4038906097412	2	1	1	21.4	7.9	7.9	15.45	0	6.7883	51481000	11	5	A0A446M388;A0A446KSI9;M7YJI2;A0A1D5TKM2;A0A3B6AUX7	A0A446M388;A0A446KSI9;M7YJI2;A0A1D5TKM2;A0A3B6AUX7	61
22.9572429656982	25.1504211425781	22.7537727355957	22.0396022796631	23.1851329803467	23.4529552459717	22.1729927062988	23.4689350128174	22.7386112213135	2	2	2	13.9	13.9	13.9	16.856	0	12.05	191240000	11	15	A0A446L863;A0A446MH90;A0A446L8A3;A0A1D5UQZ5;M8A553;A0A446L886;A0A3B6DFZ1;A0A3B6B204;A0A287ISF7;A0A287ISE4;A0A287ISH2;A0A287ISE0	A0A446L863;A0A446MH90;A0A446L8A3;A0A1D5UQZ5;M8A553;A0A446L886;A0A3B6DFZ1;A0A3B6B204;A0A287ISF7;A0A287ISE4;A0A287ISH2;A0A287ISE0	65
24.6209239959717	25.4279022216797	24.1291847229004	22.6295909881592	24.0355987548828	23.4511680603027	22.709644317627	23.9666481018066	23.0536117553711	4	4	1	56	56	9.3	16.366	0	23.475	415490000	11	13	Q2Q091;A0A446JG96;A0A287EF32;A0A446JG50;A0A287EF15;A0A287EF04;F2CTD7;Q6XPZ4;A0A446JG93;F2CYB8;A0A287EF60	Q2Q091;A0A446JG96;A0A287EF32;A0A446JG50;A0A287EF15;A0A287EF04;F2CTD7;Q6XPZ4;A0A446JG93;F2CYB8;A0A287EF60	95
24.0604953765869	24.1970558166504	22.7751808166504	21.9769954681396	23.8123073577881	23.4990634918213	22.9366664886475	23.139102935791	23.1460056304932	2	2	2	21.4	21.4	21.4	16.38	0	13.294	44748000	11	8	A0A287NI67;A0A287NIE5;A0A3B6IRE3;F2DCF7;F2CQA9;A0A446R2J5;A0A3B6JHX6;A0A3B6HTP0;A0A446RXZ0;M7ZJ41;A0A446R2I4;A0A3B6JIC3;A0A3B6HXB4;A0A446RXZ2;A0A287NI79;A0A446RY45	A0A287NI67;A0A287NIE5;A0A3B6IRE3;F2DCF7;F2CQA9;A0A446R2J5;A0A3B6JHX6;A0A3B6HTP0;A0A446RXZ0;M7ZJ41;A0A446R2I4;A0A3B6JIC3;A0A3B6HXB4;A0A446RXZ2;A0A287NI79;A0A446RY45	134
24.2383899688721	23.6525173187256	23.0240230560303	23.3560638427734	22.2440052032471	22.184663772583	23.2094974517822	23.7241268157959	24.2656726837158	1	1	1	9.6	9.6	9.6	22.665	0	6.6855	0	11	1	A0A446J4B6;A0A3B5Y3A1	A0A446J4B6;A0A3B5Y3A1	208
23.9042148590088	23.0099925994873	22.5755004882813	23.329418182373	23.3087921142578	22.7330169677734	23.582914352417	24.1119480133057	23.3203659057617	3	3	3	16.6	16.6	16.6	17.513	0	17.686	172870000	11	8	W5D739;M7YMI6;F2EAU8;A0A446PIK3;A0A446N9S7;A0A3B6GQI2;A0A3B6ENI7;A0A446PJ72;A0A287KIB2	W5D739;M7YMI6;F2EAU8;A0A446PIK3;A0A446N9S7;A0A3B6GQI2;A0A3B6ENI7;A0A446PJ72;A0A287KIB2	292
25.9658069610596	25.7295665740967	25.9988422393799	25.5669174194336	25.9217300415039	25.8851356506348	23.7932796478271	23.6319942474365	23.3026542663574	2	2	2	21.9	21.9	21.9	15.04	0	12.135	457710000	11	16	A0A3B6H417;A0A446QI36;A0A7G2IK49;A0A287MSG5;F2DAL6;F2CW94;A0A446P701;M7YZS1;A0A3B6LJH8;A0A446P714;A0A3B6KGM8;M7ZZ06;A0A287MSH1;A0A446SXG7;A0A446U383;A0A287MSH8;A0A287MSE0	A0A3B6H417;A0A446QI36;A0A7G2IK49;A0A287MSG5;F2DAL6;F2CW94;A0A446P701;M7YZS1;A0A3B6LJH8;A0A446P714;A0A3B6KGM8;M7ZZ06;A0A287MSH1;A0A446SXG7;A0A446U383;A0A287MSH8;A0A287MSE0	301
23.2518329620361	23.3002738952637	23.4955558776855	22.5745258331299	23.9990978240967	23.4427604675293	23.0813159942627	23.1158046722412	23.6661701202393	3	3	3	20	20	20	18.473	0	17.856	53318000	11	5	I3NM16;A0A3B6JDZ5;M0WQE8;A0A446R994;A0A3B6I116;Q5XUV7;A0A3B6IL34;A0A287EDV5;M7ZCR6	I3NM16;A0A3B6JDZ5;M0WQE8;A0A446R994;A0A3B6I116;Q5XUV7;A0A3B6IL34	324
23.2726154327393	22.8053092956543	23.2699241638184	23.1532707214355	22.9971523284912	22.5666313171387	22.8260078430176	23.2450656890869	23.791130065918	2	2	2	13.3	13.3	13.3	21.93	0	12.042	29190000	11	6	A0A446RZX4;F2DUQ7;A0A3B6JGM3;A0A3B6IPP5;A0A446R162;M7ZPJ0;A0A3B6HWQ2;F2DDV2;A0A287NMU1;A0A446R0Y1	A0A446RZX4;F2DUQ7;A0A3B6JGM3;A0A3B6IPP5;A0A446R162;M7ZPJ0;A0A3B6HWQ2;F2DDV2;A0A287NMU1;A0A446R0Y1	335
26.2495956420898	26.4532470703125	26.3336772918701	25.8194599151611	25.9808940887451	26.0878429412842	26.3805198669434	26.6526679992676	26.3779239654541	15	15	6	62.7	62.7	37.3	22.346	0	92.394	2115700000	11	92	A0A446SMN1;A0A3B6KBL0;M7ZS20;A0A446SMS7	A0A446SMN1;A0A3B6KBL0;M7ZS20;A0A446SMS7	357
22.9697685241699	22.8720645904541	23.3560886383057	23.1232929229736	24.0567321777344	24.1185398101807	22.6010475158691	23.2748413085938	23.6653518676758	2	2	2	19.2	19.2	19.2	14.29	0	12.168	22137000	11	3	A0A446TFN1;Q5I7L1;M7YTH6;F2DBD1;A0A446TFM2;A0A446Q627;A0A3B6LTN4	A0A446TFN1;Q5I7L1;M7YTH6;F2DBD1;A0A446TFM2;A0A446Q627;A0A3B6LTN4	389
23.873119354248	23.3747825622559	23.2353458404541	22.3416919708252	23.1153392791748	22.5386543273926	23.3639907836914	23.7064304351807	23.6800880432129	2	2	1	23.8	23.8	9.2	20.072	0	9.8753	6498600	11	0	A0A446UR61;A0A3B6LUS7;A0A287SL76;A0A287SLC9;A0A446TIN5;T1LIW9;A0A446UQV5;A0A287SLH0;F2DXL8;F2DVB6;A0A446TIM1;A0A3B6MZD2;A0A3B6KNL1;A0A287SLC3	A0A446UR61;A0A3B6LUS7;A0A287SL76;A0A287SLC9;A0A446TIN5;T1LIW9;A0A446UQV5;A0A287SLH0;F2DXL8;F2DVB6;A0A446TIM1;A0A3B6MZD2;A0A3B6KNL1;A0A287SLC3	394
23.946439743042	23.4358386993408	23.2243804931641	23.4498863220215	23.7469120025635	22.5516471862793	25.5680484771729	26.7969932556152	22.3990592956543	4	4	4	62.6	62.6	62.6	14.523	0	28.091	627050000	11	17	A0A3B6SLF2;A0A287XK72	A0A3B6SLF2	449
24.7011604309082	23.3434219360352	23.6426811218262	24.1215190887451	24.0918102264404	23.9110012054443	23.3882427215576	23.3024311065674	23.1958045959473	7	3	1	36.4	20.9	7.1	22.844	0	20	50782000	11	14	A0A446TTE5;A0A446TTD9	A0A446TTE5;A0A446TTD9	519
23.0263996124268	23.9145526885986	23.5541191101074	22.8859806060791	23.1787166595459	22.6549739837646	23.6118297576904	22.9461402893066	22.877908706665	10	6	5	51.9	38.3	38.3	18.1	0	36.781	253760000	11	7	A8QRL7;Q5BHT1;A8QRS5;A8QRK3;A8QRJ8;A8QRJ4;A8QRJ2;A8QRI3;Q43659;A8QRM4;A8QRR1;A0A2I6EDX7;A8QRK8;A8QRN9;A0A0A7AAD5;A8QRP5;Q5BLQ9;A8QRI2;A8QRK0;A8QRI1;Q5BLQ5;A8QRR4;A0A2I6EE01;Q5BLQ7;Q5BLQ8;A8QRR3;Q5BLQ6;A8QRI7;A8QRR2;B6RR57;B6RR56;A0A2I6EDW8;A0A336QZP2;A8QRK2;A0A0A7AA84	A8QRL7;Q5BHT1;A8QRS5;A8QRK3;A8QRJ8;A8QRJ4;A8QRJ2;A8QRI3;Q43659;A8QRM4;A8QRR1;A0A2I6EDX7;A8QRK8;A8QRN9;A0A0A7AAD5;A8QRP5;Q5BLQ9;A8QRI2;A8QRK0;A8QRI1;Q5BLQ5;A8QRR4;A0A2I6EE01;Q5BLQ7;Q5BLQ8;A8QRR3;Q5BLQ6	553
23.3006210327148	23.5842914581299	24.2321891784668	23.7160873413086	22.6583709716797	23.6426525115967	23.1987762451172	22.9489116668701	23.7828922271729	4	4	4	47.4	47.4	47.4	16.429	0	23.892	137070000	11	5	Q546U1;P13691;F2EI31	Q546U1;P13691;F2EI31	566
26.0441436767578	26.2739276885986	26.3156185150146	26.0530395507813	26.7435531616211	26.5239200592041	26.8526954650879	27.0014209747314	26.5082569122314	7	7	0	45	45	0	16.895	0	42.025	1194800000	10	41	A0A077RPI9;A0A446PB50;A0A287JNR6;A0A3B6LNL0;Q41561;A0A287K1P5;Q96458;A0A3B6GPK1;A0A446UCD4;A0A3B6U332;B2FH41;A0A446PC18;A0A3B6U437;B2FH43;A0A3B6U2S4;M8ALK8;A0A077RA97;Q40057;A0A287K1U2;A0A446QRA5	A0A077RPI9;A0A446PB50;A0A287JNR6;A0A3B6LNL0;Q41561;A0A287K1P5;Q96458;A0A3B6GPK1;A0A446UCD4;A0A3B6U332;B2FH41;A0A446PC18;A0A3B6U437;B2FH43;A0A3B6U2S4;M8ALK8	9
24.0751895904541	22.9316902160645	22.9504013061523	23.7225513458252	23.3936367034912	23.1875610351563	24.2485103607178	24.0179386138916	22.9635772705078	3	3	3	14.6	14.6	14.6	21.607	0	17.893	237960000	10	4	T1N316;A0A446PYE9;A0A446NMY3;A0A3B6GV05;A0A3B6EHV6;A0A077RUM9;A0A287LKX0;F2EJK5;M0WAL0	T1N316;A0A446PYE9;A0A446NMY3;A0A3B6GV05;A0A3B6EHV6;A0A077RUM9	16
23.3829174041748	23.8583488464355	23.9908428192139	23.0485057830811	23.8667984008789	23.1686630249023	29.1261043548584	28.9126224517822	22.6173267364502	10	10	4	46.3	46.3	23.2	18.143	0	61.702	19404000000	10	18	Q9FVJ5;A8QRD3;Q5BHT9;A8QRH2;A8QRG6;Q5BHS7;A8QRB1;A8QRA5;A8QRA4;A8QRA1;A8QR90;A8QR92;A0A0A7AAJ2;A0A0A7AAD7;Q5BLR0;A0A0A7AA38;A0A0A7AAG4;Q5BLR2;A0A7D5G7M5;B6RR37;A8QRH5;A8QRA2;Q5BLR1;A0EPS8;B6RR26;A0EPT5;A0EPT4;Q6RUL0;Q5BLR3;Q9SC06;B6RR52;D7F5E9;Q41554	Q9FVJ5;A8QRD3;Q5BHT9;A8QRH2;A8QRG6;Q5BHS7;A8QRB1;A8QRA5;A8QRA4;A8QRA1;A8QR90;A8QR92;A0A0A7AAJ2;A0A0A7AAD7;Q5BLR0;A0A0A7AA38;A0A0A7AAG4;Q5BLR2;A0A7D5G7M5;B6RR37;A8QRH5;A8QRA2;Q5BLR1;A0EPS8;B6RR26;A0EPT5;A0EPT4;Q6RUL0;Q5BLR3;Q9SC06;B6RR52;D7F5E9;Q41554	32
25.528413772583	23.2668628692627	23.3732948303223	26.0483283996582	23.5775566101074	26.4651622772217	22.7162857055664	22.6753425598145	22.3887577056885	6	5	4	11.9	10.3	9	88.632	0	29.648	803670000	10	25	A0A1B0Z3C8;Q6UJY5;A0A2S0X0F1;A0A142ESP3;A0A5B9BZN2;A0A1G4P1V7;A0A1G4P1W4;Q7XZH9;Q7XAI8;Q7X8G5;Q7X8G6;Q7XAI3;Q7XAI9;W0C8N8;Q7XAJ5;Q7XAJ4;Q7XAJ1;M1PPD6;A0A3G4ZJR3;Q7XAI7;Q7XAI5;A0A068F6V7;Q7XAJ2;A0A068F8L9;Q7XAJ3;A0A1G4P219;V9TRL7;Q5XZE4;Q45R38;Q42451;B8ZX17;Q1KL95;G4Y3Y1;G4Y3Y0;A0A060AAZ6;H9B854;G3FLC5;D7RT26;W8Q5H7;Q18MZ6;A9YSK5;Q6Q7J1;Q5I6T0;W6B6A4;Q7XAH5;Q7X900;Q7XAG7;Q7XAG8;Q7XAH8;Q7XAH0;Q7XAG…	A0A1B0Z3C8;Q6UJY5;A0A2S0X0F1;A0A142ESP3;A0A5B9BZN2;A0A1G4P1V7;A0A1G4P1W4;Q7XZH9;Q7XAI8;Q7X8G5;Q7X8G6;Q7XAI3;Q7XAI9;W0C8N8;Q7XAJ5;Q7XAJ4;Q7XAJ1;M1PPD6;A0A3G4ZJR3;Q7XAI7;Q7XAI5;A0A068F6V7;Q7XAJ2;A0A068F8L9;Q7XAJ3;A0A1G4P219;V9TRL7;Q5XZE4;Q45R38;Q42451;B8ZX17;Q1KL95;G4Y3Y1;G4Y3Y0;A0A060AAZ6;H9B854;G3FLC5;D7RT26;W8Q5H7;Q18MZ6;A9YSK5;Q6Q7J1;Q5I6T0;W6B6A4	56
22.9107303619385	23.1459369659424	23.109037399292	22.7650775909424	23.2330093383789	23.5922088623047	23.1602382659912	22.7222232818604	22.4112682342529	2	2	2	25.5	25.5	25.5	12.389	0	12.226	10299000	10	3	M7YG20;M0VH97;B2B9U2;A0A446LF03;A0A287J7G9;W5BX27	M7YG20;M0VH97;B2B9U2;A0A446LF03;A0A287J7G9;W5BX27	120
24.6799583435059	22.8038368225098	23.2680721282959	22.9157829284668	22.6531639099121	22.1514663696289	23.36350440979	23.5458469390869	22.9738292694092	2	2	2	14.3	14.3	14.3	16.662	0	11.772	39085000	10	3	A0A287JQN1	A0A287JQN1	122
24.1026229858398	23.7668380737305	22.6889381408691	23.6986827850342	22.2102241516113	22.807897567749	22.8737010955811	22.692440032959	22.9562644958496	1	1	1	9.9	9.9	9.9	16.408	0	6.9561	0	10	1	A0A446QC47;A0A446QBU7;A0A287MFS7;A0A446QC75;A0A3B6FVU5;M0WRX0;F2CPM4;A0A3B6EPI5;M7ZEF7;A0A3B6H4Q4	A0A446QC47;A0A446QBU7;A0A287MFS7;A0A446QC75;A0A3B6FVU5;M0WRX0;F2CPM4;A0A3B6EPI5;M7ZEF7;A0A3B6H4Q4	132
22.9452228546143	24.4365062713623	23.3218765258789	23.2770595550537	23.9611892700195	23.0017910003662	23.2270469665527	22.9635601043701	21.8870983123779	2	2	2	16.9	16.9	16.9	16.125	0	11.621	34541000	10	2	Q8S3J1;A0A446XHD2;M8AFT7;A0A446YGH3;A0A446XHG2;A0A3B6SEW6;A0A287WRG3;F2DVU2;A0A446YGX1;A0A3B6TRQ4;A0A3B6RJP2;A0A3B6QBU0;A0A3B6PFU3;A0A3B6NJZ9;A0A3B6SDH0;A0A3B6PHA3;A0A3B6NKK2;A0A446YGH2;M7YSP1;A0A287WRL8;A0A287T928	Q8S3J1;A0A446XHD2;M8AFT7;A0A446YGH3;A0A446XHG2;A0A3B6SEW6;A0A287WRG3;F2DVU2;A0A446YGX1;A0A3B6TRQ4;A0A3B6RJP2;A0A3B6QBU0;A0A3B6PFU3;A0A3B6NJZ9;A0A3B6SDH0;A0A3B6PHA3;A0A3B6NKK2;A0A446YGH2;M7YSP1;A0A287WRL8;A0A287T928	179
23.7683696746826	22.6971549987793	24.0440940856934	23.5247898101807	23.264045715332	23.5347595214844	22.4799041748047	22.9436473846436	23.5049514770508	3	3	3	19.4	19.4	19.4	15.8	0	17.663	59276000	10	5	A0A287WSA8;A0A3B6RJF0;A0A287WSJ4;A0A287WSB2;A0A287WSC2;A0A287WSF2;A0A3B6TRX8;M7ZYF5;A0A3B6SKM4;A0A287WSK5;A0A446YFQ6;A0A287WSB8;F2DHV6;A0A287WSE2;A0A446YFJ7;A0A287WSE7;A0A446YFH3	A0A287WSA8;A0A3B6RJF0;A0A287WSJ4;A0A287WSB2;A0A287WSC2;A0A287WSF2;A0A3B6TRX8;M7ZYF5;A0A3B6SKM4;A0A287WSK5;A0A446YFQ6;A0A287WSB8;F2DHV6;A0A287WSE2;A0A446YFJ7;A0A287WSE7;A0A446YFH3	180
26.5494842529297	26.6186294555664	26.3966445922852	23.6325550079346	26.1555709838867	26.0584583282471	26.2250862121582	25.7288417816162	26.1158695220947	7	7	7	51	51	51	22.026	0	42.456	1469800000	10	52	A0A446J100;A0A3B5ZWX4;A0A446J108;A0A446J106;T1MC80;A0A287FS20;A0A446JZR0;A0A3B5YY70;A0A287FS08;M0YAP1;A0A287FS03;A0A287FS01;A0A446JZT7;A0A3B6HV46;A0A446S3J5;A0A446S3J2;A0A446QZY7;A0A3B6JH08;F2D690;A0A3B6IQB1;A0A3B6INS4;A0A2H4C4A1;A0A446S3K8;A0A446S3K7;A0A446QZV4;T1MR67;A0A446R008	A0A446J100;A0A3B5ZWX4;A0A446J108;A0A446J106;T1MC80;A0A287FS20;A0A446JZR0;A0A3B5YY70;A0A287FS08;M0YAP1;A0A287FS03;A0A287FS01;A0A446JZT7	243
22.7741241455078	22.9435749053955	23.2049293518066	23.1017532348633	23.9750156402588	23.7689456939697	23.1207027435303	24.9113426208496	23.0176296234131	3	3	2	42.7	42.7	31.3	13.508	0	17.793	375100000	10	13	A0A446MIB9;A0A3B6C9E7;A0A446MHZ9;M7YPB1;Q7XY25;A0A446L938;A0A3B6B2V5	A0A446MIB9;A0A3B6C9E7;A0A446MHZ9;M7YPB1	270
26.6903247833252	26.9755249023438	23.294412612915	26.8587532043457	27.1469554901123	24.0869693756104	26.422025680542	26.3740482330322	23.2964000701904	3	3	1	47.3	47.3	28.7	13.999	0	18.068	1281900000	10	26	A0A446RB85;A0A446RAQ7;A0A3B6HZD9;A0A3B6JED4;A0A287MXJ6;F2E0P3;A0A287MXJ4;A0A287MXK2	A0A446RB85;A0A446RAQ7;A0A3B6HZD9;A0A3B6JED4	323
27.4364280700684	27.2551193237305	27.2490711212158	27.2604236602783	27.5084686279297	26.9773826599121	26.7553176879883	26.9531593322754	26.5050640106201	10	10	10	47.9	47.9	47.9	40.969	0	70.75	5156800000	10	124	A0A446RTG9;A0A446RTG4;A0A3B6INH0;A0A446RTK2	A0A446RTG9;A0A446RTG4;A0A3B6INH0;A0A446RTK2	334
24.0075244903564	23.587926864624	24.0832576751709	22.5627861022949	22.6422557830811	23.7521705627441	22.7379188537598	23.1177787780762	23.6597118377686	2	2	2	19.6	19.6	19.6	15.241	0	11.995	1117300000	10	18	A0A446UDZ9;M7ZZ82;M7ZDH2;A0A446UE17;A0A3B6KKI2;A0A446T6P8;A0A446T6Q0;A0A446UDX0;A0A446T6R2;A0A3B6MUY3;A0A446T6T2;M7Z3H1;A0A446UDW4;A0A3B6LMM2;A0A3B6UCT3;A0A446T6S1;A0A3B6MTS5;A0A3B6UBT8;A0A446T6Q7;A0A446UDW1;A0A446UDY6;A0A3B6UCR5;A0A3B6U6Y8;A0A446UE01;A0A3B6UBH8;A0A3B6U576;A0A3B6U2D8;A0A446T6Q3;A0A3B6KIU4;A0A446T6S6;M7ZC97;A0A446UDZ6;T1NAJ2;F2E8N5;A0A287RSM2;A0A3B6KKG5;A0A3B6KHX0;A0A446T6U1;A0A44…	A0A446UDZ9;M7ZZ82;M7ZDH2;A0A446UE17;A0A3B6KKI2;A0A446T6P8;A0A446T6Q0;A0A446UDX0;A0A446T6R2;A0A3B6MUY3;A0A446T6T2;M7Z3H1;A0A446UDW4;A0A3B6LMM2;A0A3B6UCT3;A0A446T6S1;A0A3B6MTS5;A0A3B6UBT8;A0A446T6Q7;A0A446UDW1;A0A446UDY6;A0A3B6UCR5;A0A3B6U6Y8;A0A446UE01;A0A3B6UBH8;A0A3B6U576;A0A3B6U2D8;A0A446T6Q3;A0A3B6KIU4;A0A446T6S6;M7ZC97;A0A446UDZ6;T1NAJ2;F2E8N5;A0A287RSM2;A0A3B6KKG5;A0A3B6KHX0;A0A446T6U1;A0A44…	364
23.0904788970947	22.2103977203369	23.8596668243408	23.6611843109131	22.212703704834	22.2552089691162	23.3674850463867	22.3048820495605	22.9019737243652	3	3	3	29	29	29	22.506	0	18.778	57182000	10	5	A0A446UF04;F2E8F6;A0A3B6LPQ1;A0A446UF56;A0A287RUN2;A0A287RUY1;A0A446UF19;A0A3B6KLR8;A0A3B6MUF0;A0A446T7U8;A0A446T7V5;A0A287RUX6;A0A287RUF8;A0A287RUM7;A0A287RUE6;A0A446T7W0;A0A287RUQ5;A0A287RUR4;A0A3B6MT13;A0A287RUW6;A0A287RUQ1;A0A287RUP4;A0A287RUQ9;A0A287RUX1;A0A287RUM2	A0A446UF04;F2E8F6;A0A3B6LPQ1;A0A446UF56;A0A287RUN2;A0A287RUY1;A0A446UF19;A0A3B6KLR8;A0A3B6MUF0;A0A446T7U8;A0A446T7V5	386
22.6879215240479	23.0490913391113	23.4248561859131	22.515193939209	22.6747779846191	22.5424671173096	23.7681179046631	23.3464279174805	23.3872680664063	2	2	2	16.6	16.6	16.6	18.124	0	11.591	55446000	10	3	A0A446WXW6;A0A3B6R7B8;A0A446RKG6;A0A3B6TBX3;A0A446RKK3;A0A3B6I296;M0V4S8;A0A446RL10	A0A446WXW6;A0A3B6R7B8;A0A446RKG6;A0A3B6TBX3;A0A446RKK3;A0A3B6I296;M0V4S8;A0A446RL10	427
24.0536613464355	22.7968082427979	24.181619644165	24.329439163208	23.3711738586426	24.0010604858398	24.8207492828369	24.0131759643555	21.8407764434814	3	3	3	26.8	26.8	26.8	16.337	0	18.071	146530000	10	18	A0A446XZX9;A0A446Y083;A0A3B6U5Q3;M7ZNZ7;A0A446XZF4;P40621;Q0KIW3;A0A446Y044;A0A446XZM0;A0A446XZH3;A0A446XZF1;A0A446Y058;A0A446XZN1;A0A287Y1G7;A0A287Y1E4;A0A287Y1I9;A0A287Y1B2;A0A287Y165;Q43481;A0A287Y1E0;A0A3B6U023;A0A446XZZ5;A0A446XZU3;A0A3B6U104;A0A3B6RSX2;A0A446XZZ0;A0A446XZT4;A0A446Y054;A0A446Y071;A0A446XZE5;A0A3B6TSR6;A0A3B6U5X7;A0A446Y050;A0A3B6TZI2;A0A446XZY6	A0A446XZX9;A0A446Y083;A0A3B6U5Q3;M7ZNZ7;A0A446XZF4;P40621;Q0KIW3;A0A446Y044;A0A446XZM0;A0A446XZH3;A0A446XZF1;A0A446Y058;A0A446XZN1;A0A287Y1G7;A0A287Y1E4;A0A287Y1I9;A0A287Y1B2;A0A287Y165;Q43481;A0A287Y1E0;A0A3B6U023;A0A446XZZ5;A0A446XZU3;A0A3B6U104;A0A3B6RSX2;A0A446XZZ0;A0A446XZT4;A0A446Y054;A0A446Y071;A0A446XZE5;A0A3B6TSR6;A0A3B6U5X7;A0A446Y050	461
25.8324108123779	23.6318092346191	22.9340915679932	23.6811923980713	23.6422672271729	22.9368324279785	22.4583721160889	25.2798709869385	23.2135963439941	3	3	2	20.5	20.5	14.7	19.699	0	17.779	333550000	10	14	A0A446NL60;D0PRB6;A0A446NKV0;T1N474;A0A3B6GSZ4;Q9ZTR8;Q7FZJ8	A0A446NL60;D0PRB6;A0A446NKV0;T1N474;A0A3B6GSZ4	493
23.1532745361328	23.6738262176514	23.0016002655029	23.5159225463867	22.3904323577881	22.0636501312256	23.1131057739258	22.7764148712158	24.0377063751221	3	2	2	20.7	14.9	14.9	19.513	0	12	490020000	10	16	A0A446PWA6;W5D5Z6;A0A446PWD3	A0A446PWA6;W5D5Z6;A0A446PWD3	497
27.1550884246826	27.3616027832031	27.4248638153076	27.118127822876	27.3328742980957	27.2089023590088	26.5874919891357	26.9865264892578	27.1071929931641	12	12	11	52.7	52.7	49.4	40.921	0	91.627	6596900000	10	226	A0A446R713;A0A446R717;A0A446R711;A0A446R715;A0A446R716;A0A3B6HW41;A0A446R714;D2KIU8;D2KIT5;E7E2M3;Q9ZTR5;Q9SPA6;F2DZZ0;A0A3B6JGH7;D2KIT1;D2KIS0;D2KIT7;D2KIT9;D2KIU5;D2KIV6;D2KIW0;D2KIW2;D2KIW4;D2KIR9;D2KIR8;D2KIR7;D2KIT0;Q0GA59	A0A446R713;A0A446R717;A0A446R711;A0A446R715;A0A446R716;A0A3B6HW41;A0A446R714	504
29.4602375030518	23.5184726715088	29.8276290893555	30.7135829925537	23.5062446594238	29.7104663848877	27.3946018218994	29.8696193695068	22.9522323608398	7	7	1	53.6	53.6	14.6	16.544	0	47.899	12855000000	10	24	C4P5U2;C4P599;C4P598;C4P5V1;C4P5V7;C4P5Y7;C4P623;A4ZIZ0;C4P647;C4P5P7;C4P5M9;C4P5J4;C4P5H6;C4P5R3;A0A446VWN7;A4ZJ03;C4P5Z6;C4P665;C4P5S3;C4P5R2;C4P5R6;C4P5L9;C4P5D0;C4P5W2;C4P5C9;C4P673;C4P661;C4P5F6;C4P5R8;C4P5C2;C4P5H8;A0A7D5MCF3;C4P5G4;C4P5I8;C4P583;C4P5E5;C4P5E6;C4P5J2;C4P5S0;C4P584;C4P5W5;A4ZIV1;C4P655;C4P5C4;C4P633;C4P629;C4P5A2;C4P5F1;C4P5V6;C4P5X6;C4P586;C4P5G0;C4P5E4;C4P5U8;C4P5A1;C4P639…	C4P5U2;C4P599;C4P598;C4P5V1;C4P5V7;C4P5Y7;C4P623;A4ZIZ0;C4P647;C4P5P7;C4P5M9;C4P5J4;C4P5H6;C4P5R3;A0A446VWN7;A4ZJ03;C4P5Z6;C4P665;C4P5S3;C4P5R2;C4P5R6;C4P5L9;C4P5D0;C4P5W2;C4P5C9;C4P673;C4P661;C4P5F6;C4P5R8;C4P5C2;C4P5H8;A0A7D5MCF3;C4P5G4;C4P5I8;C4P583;C4P5E5;C4P5E6;C4P5J2;C4P5S0;C4P584;C4P5W5;A4ZIV1;C4P655;C4P5C4;C4P633;C4P629;C4P5A2;C4P5F1;C4P5V6;C4P5X6;C4P586;C4P5G0;C4P5E4;C4P5U8;C4P5A1;C4P639…	528
24.0622100830078	24.0468940734863	23.7844944000244	22.9108200073242	23.5325870513916	22.7264575958252	23.2092208862305	23.7451820373535	24.1495094299316	1	1	1	10.8	10.8	10.8	13.313	0	7.2263	13881000	10	4	E7CWP3;E7CWP2;E7CWP0;E7CWP1;H6U7Z1;E7CWN9;E2GD45;H9B859;H9B857;H6U7Z0;H6U7Y9;D2J0T9;B1GXL7;B1GXL6;A0A446YX97	E7CWP3;E7CWP2;E7CWP0;E7CWP1;H6U7Z1;E7CWN9;E2GD45;H9B859;H9B857;H6U7Z0;H6U7Y9;D2J0T9;B1GXL7;B1GXL6;A0A446YX97	540
23.2437858581543	23.6195468902588	23.5185985565186	22.0266361236572	22.98876953125	23.1637382507324	28.2281627655029	27.9600276947021	22.5959320068359	4	4	4	45.8	45.8	45.8	12.694	0	24.213	4477200000	10	34	Q8GVD3;A0A5J6CN68;A0A7H4LGN8;Q7XZK3;M8APZ0;A0A446KY67;A0A3B6DBD5;A0A446M7R3;A0A446KY50;A0A3B6C579	Q8GVD3;A0A5J6CN68;A0A7H4LGN8;Q7XZK3;M8APZ0;A0A446KY67;A0A3B6DBD5;A0A446M7R3;A0A446KY50;A0A3B6C579	542
23.4374885559082	22.5316829681396	23.5490112304688	23.2751579284668	22.8937206268311	22.9892063140869	22.2223529815674	22.7239074707031	23.8796081542969	4	2	2	19.5	7.9	7.9	21.344	0	13.439	429550000	10	5	M0VAF1;Q0GIL6;Q0GIL5;Q0GIL2;Q0GIL0;D7F5D3;Q5ITF0;Q5ITG6;Q5ITF6;Q5ITF7;Q5ITF8;Q5ITG2;D7F5D2;Q5ITG5;Q5ITG8;Q5ITH1;Q5ITH3;Q5ITH4;Q5ITH7;Q5ITH9;Q5URW0;Q5ITG0;Q0GIM0;Q5ITA9;Q5ITC2;Q5ITE2;Q0GIQ7;Q0GIL1;Q0GIK9;Q5ITF2;Q0GIS9;Q0GIN9;A9E4F4;A9E4R4;A9E4J5;A9E4D5;A9E4E5;A9E4F0;A9E4R9;A9E4G4;A9E4L1;A9E4P3;A9E4E0;A9E4S7;A9E4H2;A9E4K3;Q5ITG7;A9E4N0	M0VAF1;Q0GIL6;Q0GIL5;Q0GIL2;Q0GIL0;D7F5D3;Q5ITF0;Q5ITG6;Q5ITF6;Q5ITF7;Q5ITF8;Q5ITG2;D7F5D2;Q5ITG5;Q5ITG8;Q5ITH1;Q5ITH3;Q5ITH4;Q5ITH7;Q5ITH9;Q5URW0;Q5ITG0;Q0GIM0;Q5ITA9;Q5ITC2;Q5ITE2;Q0GIQ7;Q0GIL1;Q0GIK9;Q5ITF2;Q0GIS9;Q0GIN9;A9E4F4;A9E4R4;A9E4J5;A9E4D5;A9E4E5;A9E4F0;A9E4R9;A9E4G4;A9E4L1;A9E4P3;A9E4E0;A9E4S7;A9E4H2;A9E4K3;Q5ITG7	563
24.0113277435303	23.3434963226318	21.6675071716309	22.9271202087402	23.814920425415	23.0369281768799	23.6856307983398	23.2072257995605	23.4613876342773	5	2	2	23.1	6.4	6.4	16.798	0	11.582	470320000	10	2	Q40052;F2CR90;A0A287Q820;A0A287Q7D2;A0A287Q7C1;A0A287Q7C6;A0A446SMK7;A0A287Q7C7;A0A287Q7L7;A0A287Q825;A0A287Q7M2;A0A287Q7E3;J7FTI7;M7ZB35;A0A287Q7E7;A0A446VFY6;A0A3B6PLS9;A0A3B6NRD7;M7ZLB1;A0A3B6QER9;A0A446VFZ7;A0A287U8L9	Q40052;F2CR90;A0A287Q820;A0A287Q7D2;A0A287Q7C1;A0A287Q7C6	584
23.5643653869629	24.3759613037109	24.0134620666504	23.390588760376	22.5360774993896	23.5386753082275	22.6859683990479	22.4933414459229	22.4096622467041	5	5	1	37.1	37.1	13.2	16.255	0	30.258	183090000	10	3	Q41518;A0A446SMN5;A0A446SMF5;A0A446SMI1;A0A446SME2;A0A446SMD4;A0A446SMH1;A0A446SML9;A0A446SMI6;A0A446SMG9;A0A3B6KAJ8;A0A3B6MJX3;A0A446SMF2;A0A446SMH5	Q41518;A0A446SMN5;A0A446SMF5;A0A446SMI1;A0A446SME2;A0A446SMD4;A0A446SMH1;A0A446SML9;A0A446SMI6;A0A446SMG9;A0A3B6KAJ8;A0A3B6MJX3;A0A446SMF2;A0A446SMH5	585
23.7833480834961	23.6325759887695	22.6291446685791	23.4796676635742	22.9354057312012	22.7011032104492	23.5445594787598	23.5905914306641	23.1483840942383	3	3	0	25.6	25.6	0	14.454	0	17.415	272360000	9	2	B2FH57;A0A287KD73;A0A287KD98;H6UG32;H6UG30;A0A3B6JJG2;A0A446PG92;A0A446PG62;Q94KM0;W5CVF8;A0A287KD16;A5A8T7;A0A3B6GRY2;A0A077RX64;A0A3B6GNZ4;A0A3B6ED29;F2EEA9;A0A1D5WXA1;Q43660;A0A287KD15	B2FH57;A0A287KD73;A0A287KD98;H6UG32;H6UG30;A0A3B6JJG2;A0A446PG92;A0A446PG62;Q94KM0;W5CVF8;A0A287KD16;A5A8T7;A0A3B6GRY2;A0A077RX64;A0A3B6GNZ4;A0A3B6ED29;F2EEA9;A0A1D5WXA1;Q43660;A0A287KD15	20
29.2988090515137	24.3409290313721	23.3385696411133	28.0784683227539	22.3566989898682	22.9921493530273	24.0685958862305	22.353063583374	22.4410915374756	6	6	4	39.1	39.1	26.4	32.598	0	37.243	7535700000	9	15	A0A173DQZ7;Q2A783;A0A3G2CFA8;A0A173DQZ1;Q7XYF0	A0A173DQZ7;Q2A783;A0A3G2CFA8;A0A173DQZ1;Q7XYF0	55
24.608118057251	23.2466602325439	22.9612140655518	23.9132385253906	24.2139682769775	23.9071941375732	22.6883945465088	22.3702182769775	23.4291877746582	2	2	2	25	25	25	10.022	0	11.91	83632000	9	9	A0A446WYE6;A0A1D6D5I2;A0A287XDZ4;A0A287R822;A0A287PDL6;A0A287KSR5;A0A287TFG1;A0A287RA31;A0A287KSN3;A0A287TF15;A0A287R9Y1;A0A287KSQ6;A0A287VGJ2;A0A287VGH6;A0A446WYF1	A0A446WYE6;A0A1D6D5I2;A0A287XDZ4;A0A287R822;A0A287PDL6;A0A287KSR5;A0A287TFG1;A0A287RA31;A0A287KSN3;A0A287TF15;A0A287R9Y1;A0A287KSQ6;A0A287VGJ2;A0A287VGH6;A0A446WYF1	85
22.5544872283936	22.5469188690186	22.9336166381836	23.3284187316895	23.4297256469727	22.9538898468018	22.4602203369141	23.1177959442139	22.8248672485352	6	2	0	41.8	20.5	0	16.483	0	12.026	1515500000	9	18	A0A446PNM3;A0A3B6EIH6;A0A446KLJ1;A0A446LWJ3;A0A446KLQ7;A0A446LWJ6;A0A446KLI4;A0A287H6Q4;A0A446LWR2;A0A446QV10;A0A3B6C2G7;A0A446PNX2;A0A3B6GRI6;A0A446PNR3;A0A446NDE7;A0A3B6FKB8;A0A446S525;A0A287KSY9;A0A446KLI7;A0A287KSZ4;A0A446PNL9;Q7DMG9;F2CQ91;M7YWX6;M7ZSQ3;P62162;W5EIR1;A0A446LWN2;M7ZST5	A0A446PNM3;A0A3B6EIH6;A0A446KLJ1;A0A446LWJ3;A0A446KLQ7;A0A446LWJ6;A0A446KLI4;A0A287H6Q4;A0A446LWR2;A0A446QV10;A0A3B6C2G7;A0A446PNX2;A0A3B6GRI6;A0A446PNR3;A0A446NDE7;A0A3B6FKB8;A0A446S525;A0A287KSY9;A0A446KLI7;A0A287KSZ4;A0A446PNL9;Q7DMG9;F2CQ91;M7YWX6;M7ZSQ3;P62162;W5EIR1;A0A446LWN2;M7ZST5	112
23.753231048584	23.6696243286133	22.6263332366943	24.1549434661865	23.7292041778564	24.5854053497314	22.148307800293	23.9771251678467	23.9196147918701	5	5	1	39.6	39.6	7.4	16.526	0	65.751	55450000000	9	6	P32936;A0A287PVL8	P32936;A0A287PVL8	140
23.8079261779785	23.1305828094482	24.3348693847656	23.3563365936279	23.9985466003418	23.0568504333496	22.747896194458	23.3558177947998	23.2294902801514	1	1	1	16.5	16.5	16.5	11.319	0	6.8073	0	9	1	A0A446T1L6;A0A446TVX1;A0A3B6KHD4;A0A446T1K3;M0XJ70;A0A446U736;A0A3B6KFS7;A0A446T1L3;W5FTF6;A0A287QE35;F2E223;W5G1U9;A0A287QER7;A0A3B6KCP7;A0A446SQ25;A0A3B6KHD1;A0A287QE94;A0A3B6KI09;T1NWZ5;T1N6J8;A0A446T1K1;A0A287R9M6;A0A287QE30	A0A446T1L6;A0A446TVX1;A0A3B6KHD4;A0A446T1K3;M0XJ70;A0A446U736;A0A3B6KFS7;A0A446T1L3;W5FTF6;A0A287QE35;F2E223;W5G1U9;A0A287QER7;A0A3B6KCP7;A0A446SQ25;A0A3B6KHD1;A0A287QE94;A0A3B6KI09;T1NWZ5;T1N6J8;A0A446T1K1;A0A287R9M6;A0A287QE30	144
23.1447925567627	23.3531265258789	22.9379844665527	23.1456642150879	23.3985595703125	22.785816192627	23.88649559021	23.8045978546143	23.3943042755127	2	2	2	13.4	13.4	13.4	19.209	0	11.917	65501000	9	5	A0A446Y7M2;A0A3B6SAF1;A0A3B6TC30;A0A3B6RG09;A0A446X7S6;A0A287W4A7;F2DAF4;A0A446X7W2;A0A446X7R7;A0A446X7S5;A0A446X7X5;A0A446X7Y6;A0A446X7T1;A0A446X853;A0A446X7U6;A0A446Y7J2;A0A446Y7M4;A0A446X7R5;A0A446X841;M7Z4V5;A0A446X7T4;A0A446Y7P2;A0A446X7Z0;A0A446Y7M9;A0A446X7W9;A0A446Y7L5;A0A446X7S8;A0A446X7Y0;A0A287W500;A0A446X7S1;A0A287W4B6;A0A287W4C6;A0A287W448;A0A287W447;A0A287W4A2	A0A446Y7M2;A0A3B6SAF1;A0A3B6TC30;A0A3B6RG09;A0A446X7S6;A0A287W4A7;F2DAF4;A0A446X7W2;A0A446X7R7;A0A446X7S5;A0A446X7X5;A0A446X7Y6;A0A446X7T1;A0A446X853;A0A446X7U6;A0A446Y7J2;A0A446Y7M4;A0A446X7R5;A0A446X841;M7Z4V5;A0A446X7T4;A0A446Y7P2;A0A446X7Z0;A0A446Y7M9;A0A446X7W9;A0A446Y7L5;A0A446X7S8;A0A446X7Y0;A0A287W500;A0A446X7S1;A0A287W4B6;A0A287W4C6;A0A287W448;A0A287W447;A0A287W4A2	177
23.6336135864258	22.9616069793701	23.3365936279297	23.3433742523193	22.6526432037354	23.1880531311035	24.3029556274414	23.5738277435303	23.2363929748535	2	2	2	23	23	23	13.5	0	11.705	1679100000	9	1	W5HK94;M7ZT54;A0A446YTW0;A0A3B6TQ10;A0A3B6RQ71;A0A287XNW4;A0A446XU79	W5HK94;M7ZT54;A0A446YTW0;A0A3B6TQ10;A0A3B6RQ71;A0A287XNW4;A0A446XU79	183
23.4305477142334	23.3945541381836	24.2504959106445	23.9559326171875	23.2787094116211	23.4718685150146	22.7239265441895	23.1052494049072	23.1802501678467	1	1	1	21.4	21.4	21.4	12.062	0	7.6044	7596000	9	1	A0A446Z065;A0A446XZV7;M8AD62;M0YB08;A0A446YZY4;A0A446XZV8;A0A3B6RT93;A0A341Z8D2	A0A446Z065;A0A446XZV7;M8AD62;M0YB08;A0A446YZY4;A0A446XZV8;A0A3B6RT93;A0A341Z8D2	190
22.4311103820801	26.0566005706787	23.4855651855469	23.2970657348633	23.5323734283447	25.8767547607422	22.6275177001953	22.7552108764648	23.5809230804443	2	2	2	17.9	17.9	17.9	13.335	0	11.692	425020000	9	12	M7ZZZ8;A0A446K2F4;A0A3B5ZWW5;A0A446K2F2;A0A3B5YZH8;A0A446J426;A0A446J3S2;A0A3B5Y213;A0A3B5Y350	M7ZZZ8;A0A446K2F4;A0A3B5ZWW5;A0A446K2F2;A0A3B5YZH8;A0A446J426;A0A446J3S2;A0A3B5Y213;A0A3B5Y350	204
23.6177406311035	23.3481426239014	22.7095394134521	24.0125198364258	22.4817867279053	24.4439506530762	22.7233963012695	22.8171653747559	23.7616577148438	1	1	1	6.4	6.4	6.4	19.284	0	6.5047	131720000	9	2	A0A3B5YRT1	A0A3B5YRT1	223
27.067533493042	27.3559875488281	27.482084274292	28.0999393463135	23.0708675384521	27.6853199005127	28.377368927002	28.3268890380859	28.5094890594482	4	4	1	32.7	32.7	7.5	11.907	0	24.806	3021000000	9	32	B2C4K0;A0A3B5YSG9;A0A446JKP1;A0A446JKH0;A0A446JK65;A0A3B5YTH4;A0A3B5YTB0;A0A446JK82;A0A446IKZ3;A0A3B5XUN6;A0A446JKA9;M7ZJ77;A0A3B5ZNZ7;A0A3B5ZQP7;A0A3B5XUN1;M7XM49;C7AE88;A0A446JK88;A0A446IKZ7;A0A3B5YS74;M7Z322;A0A446JK48;A0A446JK42;A0A3B5ZPI2;A0A3B5XUP4;A0A3B5YS71;F2EKS0;A0A287ENQ1;Q4W1F9;A0A3B5ZQG9;A0A287ENR1;A0A446IKX2;M7Z7K0	B2C4K0;A0A3B5YSG9;A0A446JKP1;A0A446JKH0;A0A446JK65;A0A3B5YTH4;A0A3B5YTB0;A0A446JK82;A0A446IKZ3;A0A3B5XUN6;A0A446JKA9;M7ZJ77;A0A3B5ZNZ7;A0A3B5ZQP7;A0A3B5XUN1;M7XM49;C7AE88;A0A446JK88;A0A446IKZ7;A0A3B5YS74;M7Z322;A0A446JK48;A0A446JK42;A0A3B5ZPI2;A0A3B5XUP4;A0A3B5YS71	224
23.4565830230713	24.5172901153564	22.2061157226563	22.9432735443115	23.4413757324219	23.5611953735352	23.9663352966309	23.3577404022217	21.0899829864502	3	3	3	40	40	40	13.179	0	17.771	100490000	9	4	A0A3B6IUX7;A0A446SGV7;A0A3B6KQS5;A0A446SGU1;M0Z6X6;F2DGG4;A0A3B6JQP9	A0A3B6IUX7;A0A446SGV7;A0A3B6KQS5	346
23.7245311737061	23.2902202606201	23.9672718048096	22.9379978179932	23.5100288391113	23.6317329406738	23.5992908477783	23.5982666015625	22.460485458374	3	3	3	35.2	35.2	35.2	13.232	0	17.47	434270000	9	7	A0A3B6KQ41;A0A446TKF6;A0A446TKM3;A0A446USX3;A0A3B6N1R2;A0A446TKF5;A0A446TKS1;A0A446TKH8;A0A446TKE2;A0A446TKE0;A0A3B6N0U3;A0A3B6LVX7;A0A3B6KS36;A0A3B6KRU3;A0A446TKF4;A0A446TKG9;A0A3B6KPJ4;A0A446TKN4;A0A446USX1;A0A3B6KQ47;A0A446TKG0;A0A3B6MZ37;A0A446UTE6;A0A3B6LVU3;A0A3B6LW56;A0A3B6LVY3;A0A3B6LUL6;A0A287SPX7;A0A3B6N050;A0A3B6KSJ4;A0A446TKG8;A0A287SPX9	A0A3B6KQ41;A0A446TKF6;A0A446TKM3;A0A446USX3;A0A3B6N1R2;A0A446TKF5;A0A446TKS1;A0A446TKH8;A0A446TKE2;A0A446TKE0;A0A3B6N0U3;A0A3B6LVX7;A0A3B6KS36;A0A3B6KRU3;A0A446TKF4;A0A446TKG9;A0A3B6KPJ4;A0A446TKN4	370
24.2640171051025	23.1770305633545	23.9501094818115	23.6996440887451	22.8300151824951	22.8393154144287	23.4462070465088	23.9046154022217	23.8492889404297	2	2	2	32	32	32	10.259	0	11.916	4736100	9	2	F2E2I4;A0A446UTX3;B5LQU6;B5LQU3;B5LQT1;A0A446UTV9;A0A3B6MZL4;A0A3B6LV66;A0A287SRV4;A0A446TLF0;A0A446TLC2;A0A3B6KQ21;A0A287R124	F2E2I4;A0A446UTX3;B5LQU6;B5LQU3;B5LQT1;A0A446UTV9;A0A3B6MZL4;A0A3B6LV66;A0A287SRV4;A0A446TLF0;A0A446TLC2;A0A3B6KQ21;A0A287R124	397
23.3243598937988	23.6000442504883	22.3340282440186	22.9952564239502	22.9164295196533	23.1277904510498	22.9143562316895	23.4743728637695	23.2224235534668	2	2	2	12.8	12.8	12.8	17.89	0	12.401	176680000	9	8	A0A3B6TQ11;A0A3B6SI06;A0A3B6RDA7	A0A3B6TQ11;A0A3B6SI06;A0A3B6RDA7	432
23.5905437469482	23.2224025726318	23.1967506408691	23.2452125549316	23.4505233764648	23.4095420837402	27.6041355133057	26.6293697357178	28.0330181121826	5	5	5	59	59	59	10.808	0	31.261	934130000	9	19	A0A446XJV3;A0A3B6RKV2;A0A446XJR6;M8ANF4;M0VJA1;A0A3B6TL27	A0A446XJV3;A0A3B6RKV2;A0A446XJR6;M8ANF4;M0VJA1	438
27.4721221923828	27.154411315918	27.0421829223633	27.3451957702637	27.3104267120361	26.9693908691406	26.9626770019531	26.9444732666016	26.6414108276367	5	5	3	32.3	32.3	19.7	13.524	0	29.78	2046800000	9	89	O64394;A0A446K6K2;Q7FT21;O64395;M8AWN9;Q9LDX4	O64394;A0A446K6K2;Q7FT21;O64395;M8AWN9;Q9LDX4	477
24.1577320098877	22.9610958099365	22.2454891204834	24.4779262542725	23.2477874755859	22.0753555297852	25.0281677246094	24.324556350708	25.7813167572021	5	5	5	40.2	40.2	40.2	19.333	0	30.84	1652100000	9	19	A0A446RR12;A0A446RR67;I3NM41;A0A446RR88;Q43474;Q43769;F2CWL7;A0A287N1F2	A0A446RR12;A0A446RR67;I3NM41;A0A446RR88	509
22.7841320037842	23.6382217407227	23.9089984893799	23.4252662658691	22.866397857666	23.3345336914063	23.2447414398193	23.3680038452148	22.705135345459	5	5	5	41.8	41.8	41.8	11.6	0	31.636	9227400000	9	14	A0A446U3P8;P24296;Q8GZB0;Q5NE27;A0A3B6MQG8	A0A446U3P8;P24296;Q8GZB0;Q5NE27	520
23.1672973632813	23.7841892242432	23.1812343597412	23.3291854858398	23.5410671234131	24.1520328521729	23.6315479278564	23.0642757415771	22.7120628356934	6	4	3	24.4	16.3	16.3	22.132	0	24.222	791570000	9	11	A0A446VRL0	A0A446VRL0	526
23.5756397247314	29.8677349090576	24.1679286956787	29.5783786773682	30.0218124389648	30.1112289428711	22.2045593261719	23.8303241729736	22.8896636962891	11	2	0	76.6	20.6	0	15.069	0	13.288	6933100000	9	15	A0A7H1K1S7;C3VW64;C3VWS4;C3VWP8;C3VWP7;C3VWJ1;C3VWE5;C3VWB5	A0A7H1K1S7	544
30.4175987243652	30.9072723388672	30.788537979126	30.3901805877686	30.0249862670898	30.5524291992188	32.623420715332	32.8442535400391	33.7055320739746	16	16	0	100	100	0	13.181	0	105.64	63089000000	9	151	A4GFN8;C3VWT6;C3VWN4;C3VWM4;C3VW93;C3VW80;A0A7H1K1U4;A0A7H1K1U0;C3VWT5;A4GFP9;C3VWP0;C3VWG7;C3VWD8;L7P0M1;C3VWS7;C3VWJ5;A4GFP8;C3VWE0;C3VWT1;C3VWT3;C3VW63;C3VWF0;C3VW72;C3VWJ4;A0A4P8DKQ0;M1PST7;M1Q848;A0A3B6FHE6;C3VW67;L7P0Z8;C3VWQ4;A0A446PFN7;A0A077RQ83;P10846	A4GFN8;C3VWT6;C3VWN4;C3VWM4;C3VW93;C3VW80;A0A7H1K1U4;A0A7H1K1U0;C3VWT5;A4GFP9;C3VWP0;C3VWG7;C3VWD8;L7P0M1;C3VWS7;C3VWJ5;A4GFP8;C3VWE0;C3VWT1;C3VWT3;C3VW63;C3VWF0;C3VW72;C3VWJ4	549
22.8757743835449	23.4388027191162	24.4852981567383	23.7502174377441	23.5232219696045	23.4336738586426	23.4344463348389	24.5950717926025	22.1310367584229	5	1	1	56.5	20.2	20.2	13.509	0	7.1927	0	9	1	Q5UHH5;A5HDZ4;A5HDZ2;A4GFQ6;A4GFQ7;A4GFN9	Q5UHH5;A5HDZ4;A5HDZ2;A4GFQ6;A4GFQ7;A4GFN9	551
23.4007091522217	23.9679870605469	23.8690414428711	24.1693382263184	22.6498374938965	23.9323196411133	23.3987903594971	22.2005233764648	23.6553535461426	10	1	0	60.3	9.9	0	14.973	0	8.8784	171190000	9	5	Q4U197;C3VWT2	Q4U197;C3VWT2	556
23.3165683746338	23.7194232940674	24.1754188537598	23.5540657043457	24.0796489715576	22.923038482666	22.609073638916	22.5734176635742	22.7253742218018	11	2	0	70.9	30.5	0	15.105	0	13.205	5839800000	9	2	C8CAI4	C8CAI4	558
23.5127048492432	23.7581424713135	23.7889995574951	23.355188369751	23.2671985626221	23.2457733154297	23.009786605835	23.8505706787109	23.66725730896	5	2	0	34.8	19.5	0	18.493	0	11.72	0	9	0	G8CLR3;D7F5E8;D7F5E7	G8CLR3;D7F5E8;D7F5E7	564
23.3485050201416	23.6518287658691	22.7028999328613	23.2173042297363	23.1030197143555	24.1069660186768	23.81396484375	23.5000305175781	23.6751670837402	4	2	2	28.8	16.1	16.1	32.513	0	12.608	66474000	9	4	P0CZ05;G9I0T1;V5M3L6;V5M3L1;V5M127;V5M0Z7;V5M0W9;P0CZ06;G9I0U5;G9I0U4;G9I0U3;G9I0U1;A0A1W6C2M3;G9I0T7;G9I0S9;A5A4L4;A0A286QT77;G9I0T9;A0A1W6C2L7;G9I0S8;A0A286QSW6;A7XUQ7;D6QZM4;D6QZM5;D6QZM8;G9I0T6;A0A173DQZ4;A0A1W6C2L9;D0EWS4;G9I0T4;Q7X9M3	P0CZ05;G9I0T1;V5M3L6;V5M3L1;V5M127;V5M0Z7;V5M0W9;P0CZ06;G9I0U5;G9I0U4;G9I0U3;G9I0U1;A0A1W6C2M3;G9I0T7;G9I0S9;A5A4L4;A0A286QT77;G9I0T9;A0A1W6C2L7;G9I0S8;A0A286QSW6;A7XUQ7;D6QZM4;D6QZM5;D6QZM8;G9I0T6;A0A173DQZ4;A0A1W6C2L9;D0EWS4;G9I0T4;Q7X9M3	575
23.900842666626	23.6259078979492	23.5016536712646	22.7143821716309	23.8264675140381	22.3113059997559	23.0162620544434	22.2265949249268	22.2793159484863	15	1	0	100	11.3	0	13.195	0	8.6433	804280000	9	5	Q5UHH6;Q5UHH8;Q4U1A1;Q4U195;W5D003;Q4U1A3;Q4U199	Q5UHH6;Q5UHH8;Q4U1A1;Q4U195;W5D003;Q4U1A3;Q4U199	587
23.9613075256348	24.5250339508057	23.5319042205811	23.4142246246338	24.095739364624	23.0699214935303	23.9310989379883	24.0140266418457	22.3355274200439	2	2	2	23.4	23.4	23.4	14.432	0	11.776	5887900	8	3	A0A446M1D7;A0A077RPZ8;A0A287HJT1;A0A446M1S0;A0A446KRD4;A0A0C4BJ32;F2CVN5;M7Z5R9	A0A446M1D7;A0A077RPZ8;A0A287HJT1;A0A446M1S0;A0A446KRD4;A0A0C4BJ32;F2CVN5;M7Z5R9	10
23.4593563079834	22.9084186553955	23.120662689209	22.5344161987305	23.1096820831299	23.883279800415	23.2884082794189	22.7456455230713	22.8552303314209	1	1	1	11.7	11.7	11.7	12.468	0	6.5668	0	8	1	B6VCR5;A0A287MS09;F2CXY7;A0A3B6ER29;A0A3B6H6X9;A0A446P6V7;A0A446P6V2;A0A446P6V9;G8CNE5;G8CNB9;A0A287MRX6;A0A287EUG9;A0A287GHS5;F2E134;B6VCR4;A0A287EUH0;A0A287GHS8;A0A287EUI0;A0A3B6SES7;A0A3B6SMF2;A0A3B6SIA9;A0A287MS08;A0A287GHR8;A0A3B6SL34;A0A287P7X0;A0A287GHS1;A0A080YUG0	B6VCR5;A0A287MS09;F2CXY7;A0A3B6ER29;A0A3B6H6X9;A0A446P6V7;A0A446P6V2;A0A446P6V9;G8CNE5;G8CNB9;A0A287MRX6;A0A287EUG9;A0A287GHS5;F2E134;B6VCR4;A0A287EUH0;A0A287GHS8;A0A287EUI0;A0A3B6SES7;A0A3B6SMF2;A0A3B6SIA9;A0A287MS08;A0A287GHR8;A0A3B6SL34;A0A287P7X0;A0A287GHS1;A0A080YUG0	29
23.4835395812988	24.6486148834229	24.2652072906494	24.0047035217285	22.9101524353027	23.9803276062012	24.6644344329834	22.9481754302979	24.2333755493164	2	2	2	25.5	25.5	25.5	10.706	0	12.293	226030000	8	17	W5G5Q1;A0A446WPP7;A0A287V000	W5G5Q1;A0A446WPP7;A0A287V000	170
23.4035663604736	24.1301345825195	26.616247177124	26.8553123474121	22.5813179016113	27.4948024749756	27.3247451782227	26.9258079528809	22.885763168335	3	3	3	21.9	21.9	21.9	16.305	0	17.888	1141900000	8	28	A0A446MLV2;A0A3B6CDS3;A0A2X0SLS2;A0A446LD74;A0A3B6B2X3;Q43770;F2CRF2	A0A446MLV2;A0A3B6CDS3;A0A2X0SLS2;A0A446LD74;A0A3B6B2X3;Q43770;F2CRF2	187
23.4380989074707	23.0046291351318	23.0820255279541	22.8010082244873	22.8400859832764	22.7997169494629	22.7974033355713	23.3748378753662	23.952091217041	1	1	1	13.5	13.5	13.5	13.197	0	7.1163	0	8	1	A0A3B5ZZL6;M7YHT0;A0A446J6V6;A0A3B5Y4I2;A0A446J6T9	A0A3B5ZZL6;M7YHT0;A0A446J6V6;A0A3B5Y4I2;A0A446J6T9	212
23.2441787719727	22.8503379821777	23.1601905822754	23.8818435668945	22.3904037475586	23.4633159637451	23.0746917724609	23.3053588867188	24.7089538574219	2	2	2	39.3	39.3	39.3	9.3256	0	11.695	8245200	8	1	P82977;M7Z563;J7QW61;B3FHM6;A0A446JH91;A0A3B5ZMV0;A0A3B5YRR0;A0A3B5YQP1;A0A446JHB9;A0A3B6TY76;A0A3B5ZNA8;M8AF93	P82977;M7Z563;J7QW61;B3FHM6;A0A446JH91;A0A3B5ZMV0;A0A3B5YRR0;A0A3B5YQP1;A0A446JHB9;A0A3B6TY76;A0A3B5ZNA8;M8AF93	220
23.4376850128174	23.5342483520508	23.5987358093262	23.3845615386963	23.45778465271	22.6881046295166	22.348331451416	22.5528392791748	23.0896110534668	2	2	2	18.1	18.1	18.1	8.9973	0	13.306	82778000	8	6	A0A446JHW6;A0A3B5YQY0	A0A446JHW6;A0A3B5YQY0	222
23.4936103820801	22.6117687225342	22.9258651733398	23.4708976745605	22.5839538574219	23.4823741912842	23.37548828125	23.8566951751709	23.4418563842773	1	1	1	11	11	11	13.666	0	6.8518	39617000	8	9	M7ZLG8;A0A446KMI1;A0A3B6ASI2;W5C596;A0A3B6C0M6	M7ZLG8;A0A446KMI1;A0A3B6ASI2;W5C596;A0A3B6C0M6	248
24.7924556732178	23.0224456787109	22.4148712158203	23.9365978240967	23.7462005615234	23.1018142700195	23.4235286712646	23.0536098480225	23.014331817627	1	1	1	38.3	38.3	38.3	12.364	0	6.3812	74902000	8	4	A0A446MPC9;A0A3B6CCK4	A0A446MPC9;A0A3B6CCK4	271
22.7694244384766	23.6663131713867	23.149866104126	23.1787509918213	22.4536609649658	24.1004600524902	24.2310886383057	22.7259769439697	23.4201793670654	4	3	1	34.6	24	8.7	11.077	0	14.021	67102000	8	2	F2EID0;A0A446RAF9;A0A3B6IKM2;Q0KIW2;A0A446RAA1;M4VSR0;F2CXF8;Q43472;A0A446RPS1;A0A446RAG7;A0A446RAT7;A0A446RPR7;A0A446RPR6;A0A446RAG6;A0A446RAA6;A0A446RAG5;A0A446RPT2;A0A3B6JDJ0;A0A446RPR1	F2EID0;A0A446RAF9;A0A3B6IKM2;Q0KIW2;A0A446RAA1;M4VSR0;F2CXF8;Q43472;A0A446RPS1;A0A446RAG7;A0A446RAT7;A0A446RPR7;A0A446RPR6;A0A446RAG6;A0A446RAA6;A0A446RAG5;A0A446RPT2;A0A3B6JDJ0;A0A446RPR1	332
23.1269645690918	23.3303737640381	24.4059524536133	23.5975933074951	22.5865211486816	24.1478462219238	22.7976531982422	23.1229343414307	23.4071807861328	1	1	1	10.7	10.7	10.7	15.244	0	6.8678	62255000	8	10	M7ZT65;A0A446U9F7;A0A3B6LLZ5;A0A3B6KGQ5;A0A446U9F9	M7ZT65;A0A446U9F7;A0A3B6LLZ5;A0A3B6KGQ5;A0A446U9F9	360
23.6238059997559	23.6574325561523	24.1479053497314	23.2654781341553	22.1233882904053	22.7790260314941	22.6933708190918	22.9071006774902	22.9478702545166	3	2	1	43.6	37.6	18.8	15.027	0	12.524	137430000	8	9	A0A446V385;A0A446V3F1;A0A3B6NIL7	A0A446V385;A0A446V3F1;A0A3B6NIL7	404
28.6496906280518	28.6269702911377	28.185510635376	28.1527214050293	29.203498840332	28.2627983093262	28.2774620056152	28.1872577667236	27.9302158355713	8	8	2	49.8	49.8	22.9	20.36	0	52.158	7850000000	8	90	A0A446WPH4;A0A3B6PTJ6;Q41579;A0A446WPB2;A0A446VRL8;M7ZAS7;A0A287UZC9;T1TDK8;T1TEQ6;Q5D5Z4;Q5D5Y8;Q5D5Z8;Q5D604;Q5D602;Q5D5Z6;T1TEB9;Q5D635;Q9SPA8;Q5D5Z0;Q9SPA5;Q5D609;T1TET2;F2E7E7;Q5D612;Q5D607;Q5D606;Q5D5Z2;Q5D5Z1;Q9ZTR4;A3RHE3;Q5D636;M7ZYT7;A3RHG5;F2E2S3;Q9ZTR2;Q9SPA3;A0A287M6Q8;A0A446NXZ3;A0A3B6EMK8;A0A142FHV4;A0A077S5J5;A0A446Q805;A3RHE5;Q9ZTR6;A0A287UZS8;Q5D630;Q5D629;Q5D633;A3RHE8;A3RHE2;P…	A0A446WPH4;A0A3B6PTJ6;Q41579;A0A446WPB2	425
23.28493309021	23.1457195281982	22.4177799224854	24.1382331848145	24.0922756195068	23.4187240600586	23.8133392333984	22.7153873443604	23.9619522094727	9	3	3	53.3	34.2	34.2	13.096	0	17.832	1072800000	8	4	C7C4X0;A0A4P8DL35;A0A3B6TFZ6;P16850	C7C4X0;A0A4P8DL35;A0A3B6TFZ6;P16850	457
23.3509902954102	22.698938369751	23.3357048034668	23.8429622650146	22.7530097961426	22.9788761138916	29.1737899780273	29.1311912536621	29.4375991821289	5	3	2	47.3	32.3	16.1	9.9626	0	11.655	2703500000	8	22	Q53WS3;P04568;A0A446JYY6	Q53WS3;P04568;A0A446JYY6	474
25.0694828033447	23.3839683532715	24.989408493042	23.2909870147705	22.9604377746582	22.6842041015625	24.5156288146973	24.4143524169922	24.5634880065918	3	3	3	37	37	37	16.945	0	18.249	356790000	8	14	M8A626;E6Y2R7;A0A446R7S9;A0A446RSJ2;A0A3B6JEN2;A0A3B6IK93;F2CQY9;A0A287N4U5	M8A626;E6Y2R7;A0A446R7S9	505
30.4771118164063	30.2643890380859	30.4683990478516	30.5599231719971	30.2305469512939	30.3235645294189	31.0481719970703	31.4626579284668	22.3848361968994	14	11	0	100	88.7	0	13.191	0	98.882	22599000000	8	75	Q5MD68;A4GFP2;P01084;Q5I4D7;A5HE03;A5HE12;A5HE07;A5HDZ8;A5HE18;A5HE25;A5HE08;A5HE16;A5HDZ6;A5HE29	Q5MD68;A4GFP2;P01084;Q5I4D7;A5HE03	550
27.4299793243408	27.4937343597412	27.5577163696289	27.9441375732422	28.2048988342285	28.2134990692139	28.8840770721436	28.5644912719727	28.9071578979492	7	7	6	56.6	56.6	56.6	14.644	0	42.989	5105400000	8	69	B8YM21;B8YM17;B8YM01;B8YM14;B8YM12;B8YM04;M8A8G4;B8YLZ6;B8YLY8;A0A446JBR4;A0A3B5Y650;B8YLZ3;B8YM03;B8YM15;P01543;Q9T0P2;B8YM05;B8YM08;B8YLY9;B8YLZ1;B8YM20	B8YM21;B8YM17;B8YM01;B8YM14;B8YM12;B8YM04;M8A8G4;B8YLZ6;B8YLY8;A0A446JBR4;A0A3B5Y650;B8YLZ3;B8YM03;B8YM15;P01543;Q9T0P2;B8YM05	555
28.3157901763916	28.1994323730469	28.4705333709717	28.4380950927734	28.6803646087646	28.0116939544678	26.8705596923828	27.7949504852295	23.7084465026855	6	6	6	53.6	53.6	53.6	20.606	0	36.682	5288000000	8	47	D2KFH0	D2KFH0	560
23.2705154418945	22.6546249389648	22.6152210235596	24.002067565918	22.7826480865479	22.5498104095459	23.0140476226807	23.1700382232666	23.4653396606445	2	2	2	29	29	29	17.355	0	11.79	114220000	8	7	W5CY88;M7Z9N7;F2E5J1;A0A3B6GVH3;A0A3B6ELY8;A0A287LAF9	W5CY88;M7Z9N7;F2E5J1;A0A3B6GVH3;A0A3B6ELY8;A0A287LAF9	602
23.2297096252441	24.5128211975098	23.2798023223877	22.9269332885742	23.0623874664307	23.2753734588623	23.1368846893311	23.7078495025635	22.8713893890381	1	1	1	11.6	11.6	11.6	12.753	0	6.5326	125050000	7	11	A0A287KNT7;A0A077RVD7	A0A287KNT7;A0A077RVD7	17
28.3849220275879	29.1783084869385	29.2017707824707	27.8670864105225	29.1975116729736	29.2312335968018	28.7586250305176	28.519832611084	27.7853775024414	4	4	1	63.3	63.3	16.7	13.094	0	23.965	8322300000	7	57	Q9SQG8;Q9SQG3;A0A446QHK8;A0A3B6G229;A0A080YUA6;O64393	Q9SQG8;Q9SQG3;A0A446QHK8;A0A3B6G229;A0A080YUA6;O64393	28
23.4036483764648	22.7735443115234	24.0695629119873	23.3654632568359	24.2686614990234	22.3255996704102	23.2486362457275	22.7597827911377	23.8067073822021	3	3	1	33.6	33.6	19.3	14.272	0	17.771	248360000	7	11	A0A446TDL0;A0A0H4MAT1;P12952;A0A3B6KNY8;A0A446TD72;M7ZRE7;A0A3B6MXM2;Q5D642;Q5D646;Q5D656;A0A446TD81;Q9SBI9;A0A287S8C1;Q9SPB0;A0A287S8E1;P12951;F2D383;A0A287S8M0;Q549A8;P93179;Q40043;A0A446UKI6;Q5D657;Q5D651;Q5D647;T1TEV4;Q5D658;A0A287S8I1;A0A287S8C5	A0A446TDL0;A0A0H4MAT1;P12952;A0A3B6KNY8;A0A446TD72;M7ZRE7;A0A3B6MXM2;Q5D642;Q5D646;Q5D656;A0A446TD81;Q9SBI9;A0A287S8C1;Q9SPB0	45
24.0121192932129	23.7764415740967	23.8614864349365	22.9507656097412	23.9190006256104	24.7451591491699	23.3330574035645	23.2177467346191	23.5713310241699	4	4	2	40.7	40.7	22.8	13.011	0	24.164	505520000	7	3	A0A3B6AU95;A0A1D5UXT7;A0A446RTM2;A0A3B6IKN6;M8AAF9;A0A446KNK2;I0JTW3;A0A182BG19;A0A3B6JF11;Q1ENF0;F2EC58;Q1ENF2;F2CUF5;A0A3B6JCA3	A0A3B6AU95;A0A1D5UXT7	69
23.0238475799561	22.9007873535156	23.7565212249756	24.1957530975342	24.2312641143799	23.409631729126	23.0294589996338	23.2327747344971	22.982084274292	2	2	2	27.7	27.7	27.7	11.101	0	12.135	151970000	7	12	W5D591;F2CW55;A0A446QAA9;A0A446NZY9;A0A3B6GZB9;A0A3B6ENM3;A0A287MC71;A0A287MC73;A0A287MC69;A0A3B6H3N9;A0A3B6FV03;A0A3B6EQL7;W5D2R4;A0A3B6H117;A0A287MC57	W5D591;F2CW55;A0A446QAA9;A0A446NZY9;A0A3B6GZB9;A0A3B6ENM3;A0A287MC71;A0A287MC73;A0A287MC69;A0A3B6H3N9;A0A3B6FV03;A0A3B6EQL7;W5D2R4;A0A3B6H117;A0A287MC57	131
23.2538318634033	23.2616081237793	23.4545021057129	22.3653564453125	23.1203746795654	23.8554534912109	23.1409473419189	22.4472484588623	23.4096260070801	2	2	2	24.4	24.4	24.4	13.73	0	11.736	19093000	7	3	A0A287SR52;A0A446TKW6;A0A3B6KQB8;M7YW95;A0A446UTB3;F2CV88;A0A287SR19;A0A3B6LWE1;A0A287SQX8;A0A287SQY0;A0A287SR72	A0A287SR52;A0A446TKW6;A0A3B6KQB8;M7YW95;A0A446UTB3;F2CV88;A0A287SR19;A0A3B6LWE1;A0A287SQX8;A0A287SQY0;A0A287SR72	155
24.3015193939209	23.9125289916992	24.3045063018799	22.1423492431641	22.7933235168457	24.0372428894043	22.7658634185791	22.7549476623535	23.3055248260498	5	4	4	20.7	20.7	20.7	15.5	0	24.404	342780000	7	10	P28041;A0A287W0A8	P28041;A0A287W0A8	176
23.8903198242188	22.6548767089844	23.7097244262695	23.3646335601807	22.7281227111816	22.5344638824463	23.1898593902588	22.1315002441406	23.7807426452637	4	4	2	44.8	44.8	25.2	15.309	0	23.592	151710000	7	2	M7ZRA2;A0A446M7Z6;A0A446KX05;A0A3B6C521;A0A3B6AXG0;A0A2X0SNJ0;A0A287I0Y4;M0Y8U3;A0A287I120;A0A287I0T2;Q9XHS0;M0Y8U1;A0A446KX00;A0A287I0Z1	M7ZRA2;A0A446M7Z6;A0A446KX05;A0A3B6C521;A0A3B6AXG0;A0A2X0SNJ0;A0A287I0Y4;M0Y8U3;A0A287I120;A0A287I0T2;Q9XHS0;M0Y8U1;A0A446KX00;A0A287I0Z1	188
23.6930313110352	24.4013195037842	22.7122459411621	22.6778736114502	23.5437660217285	23.7097778320313	22.604471206665	22.5072383880615	23.2471027374268	1	1	1	15.4	15.4	15.4	12.759	0.0084175	6.2714	0	7	1	A0A446IPI8;A0A446IPI7;A0A446IPI3;A0A446IPI4;A0A446IPJ8;A0A446IPK3;A0A446IPJ3;A0A446IPI9;A0A411J043;A0A446IPJ6;A0A446IPJ5;A0A3B5XWI2;A0A446IPK5;A0A3B5XXG2;A0A446IPI6	A0A446IPI8;A0A446IPI7;A0A446IPI3;A0A446IPI4;A0A446IPJ8;A0A446IPK3;A0A446IPJ3;A0A446IPI9;A0A411J043;A0A446IPJ6;A0A446IPJ5;A0A3B5XWI2;A0A446IPK5;A0A3B5XXG2;A0A446IPI6	197
23.3925075531006	22.2262954711914	24.2894382476807	23.1472034454346	23.7089557647705	23.638599395752	23.2490711212158	22.7798118591309	23.2874603271484	3	3	2	31.5	31.5	31.5	9.5181	0	18.372	67822000	7	3	Q43665;M7YKU0;A0A446K273;A0A446J3H1;A0A3B5Z0M5;A0A3B5Y1V9;F2EHA8	Q43665;M7YKU0;A0A446K273;A0A446J3H1;A0A3B5Z0M5;A0A3B5Y1V9;F2EHA8	203
24.2054920196533	22.6316356658936	22.8813896179199	23.1120319366455	21.7761726379395	24.4280834197998	25.5293083190918	25.1129093170166	22.655891418457	3	3	3	21.6	21.6	21.6	17.483	0	19.433	167100000	7	13	A0A446KDG7;A0A446JDR3;A0A3B6A374;A0A3B5Z662;M0WY94;A0A3B5Y776	A0A446KDG7;A0A446JDR3;A0A3B6A374;A0A3B5Z662;M0WY94;A0A3B5Y776	239
23.1460723876953	23.7788734436035	22.980260848999	23.1563873291016	23.4286956787109	23.6688117980957	22.9127578735352	24.5340518951416	23.1709270477295	1	1	1	21.7	21.7	21.7	14.993	0	6.88	0	7	1	A0A446KSC1;A0A3B6DD34;A0A446M2K8;A0A446KSL1;A0A3B6AUU3;W5C753;M7Y780;A0A446KSM1;A0A446KSK6;A0A446KSF0;A0A3B6AU90	A0A446KSC1;A0A3B6DD34;A0A446M2K8;A0A446KSL1;A0A3B6AUU3;W5C753;M7Y780;A0A446KSM1;A0A446KSK6;A0A446KSF0;A0A3B6AU90	252
23.084810256958	24.2875843048096	26.4130458831787	23.5529136657715	22.2305011749268	22.4916591644287	25.9615955352783	23.2481384277344	22.5962371826172	4	2	2	50.4	32.2	32.2	12.94	0	11.56	430600000	7	7	A0A3B6C126	A0A3B6C126	267
23.5296058654785	23.1210918426514	22.5738430023193	22.5951957702637	23.4519805908203	22.0005416870117	23.1752243041992	22.285982131958	23.0003414154053	1	1	1	9.3	9.3	9.3	11.659	0	6.659	0	7	0	A0A446Q2E3;A0A3B6FVE1	A0A446Q2E3;A0A3B6FVE1	296
23.0613327026367	23.0082035064697	23.0143814086914	23.4879837036133	24.5408096313477	23.9047775268555	24.1146583557129	23.1390151977539	22.7444458007813	3	3	3	24.1	24.1	24.1	17.937	0	17.462	224710000	7	4	A0A3B6KBM3;A0A446SMT9;A0A3B6KBM7;T1NGW8;A0A3B6KCG0;A0A3B6KAN2;A0A3B6K9K0;A0A3B6KBI6	A0A3B6KBM3;A0A446SMT9;A0A3B6KBM7;T1NGW8;A0A3B6KCG0;A0A3B6KAN2;A0A3B6K9K0	358
22.990442276001	23.9313278198242	23.7299060821533	24.1885681152344	24.1076908111572	22.8726062774658	23.0568046569824	22.9466571807861	22.5140075683594	2	1	1	28.6	28.6	28.6	15.089	0	10.627	501320000	7	16	M8ACK2;A0A3B6KQU7	M8ACK2;A0A3B6KQU7	373
23.1790370941162	23.8556594848633	23.1847991943359	23.8175182342529	23.659387588501	23.3630886077881	23.9193992614746	23.909854888916	24.1747341156006	2	1	1	24.7	19.5	19.5	18.36	0.0050676	6.3083	6957000	7	1	M7YRS8;A0A446TJ53;A0A446TJ92;A0A3B6KRY8	M7YRS8;A0A446TJ53;A0A446TJ92;A0A3B6KRY8	375
22.4813194274902	22.8987350463867	28.814395904541	23.2669010162354	27.0505104064941	28.9893436431885	28.137508392334	28.0755634307861	23.4062004089355	2	2	2	14.4	14.4	14.4	16.925	0	11.762	3096000000	7	22	A0A446U7M1;A0A3B6MQN2;A0A3B6LLH7;F2E8X4;A0A446T255	A0A446U7M1;A0A3B6MQN2;A0A3B6LLH7;F2E8X4;A0A446T255	383
23.2044563293457	23.4310340881348	22.8336944580078	23.7794570922852	22.4319305419922	23.1452465057373	24.3987979888916	23.4498386383057	22.8490390777588	3	1	1	34.7	28.7	28.7	15.162	0	8.268	210250000	7	13	Q41601;A0A3B6LUM2	Q41601;A0A3B6LUM2	393
24.3426418304443	25.5542640686035	25.4630126953125	25.9409828186035	26.1371955871582	25.7536106109619	23.5631160736084	23.4210205078125	22.5353965759277	3	1	1	24.4	16.3	16.3	22.048	0	6.993	549580000	7	21	A0A3B6NTR2	A0A3B6NTR2	415
24.1973285675049	24.3855781555176	22.7225761413574	22.6271171569824	23.2266750335693	22.5747146606445	23.1301193237305	22.3088779449463	24.640625	4	4	4	60.2	60.2	60.2	9.7942	0	25.01	1005800000	7	0	A0A3B6SQW0;A0A446YTS6;T1NPR1;A0A3B6SIK2;A0A3B6SM48;A0A3B6TKB5;A0A3B6SS91	A0A3B6SQW0;A0A446YTS6;T1NPR1;A0A3B6SIK2;A0A3B6SM48;A0A3B6TKB5	454
22.7562961578369	23.2459506988525	24.1312923431396	23.5165252685547	22.578893661499	23.0736103057861	23.6044540405273	22.8421401977539	23.3990650177002	3	1	1	44.2	19	19	14.805	0	6.7424	12766000	7	1	A0A446W167;A0A446W113;A0A3B6U0P4	A0A446W167;A0A446W113;A0A3B6U0P4	460
23.0647392272949	22.6686973571777	23.3580093383789	22.6063251495361	24.6423606872559	22.146900177002	22.5246162414551	22.7361087799072	21.9216289520264	2	1	1	14	9.1	9.1	34.966	0	6.4779	0	7	0	A0A3G3C4I6	A0A3G3C4I6	462
23.7978630065918	23.5329303741455	24.3108787536621	24.547399520874	28.9687042236328	28.7565269470215	27.3795604705811	28.6006660461426	22.6664810180664	5	3	3	49	33.8	33.8	16.205	0	20.129	2480700000	7	20	A7XDG3;A0A446IHD3	A7XDG3;A0A446IHD3	465
22.7578582763672	23.6767425537109	24.2967681884766	23.5328979492188	22.8154563903809	22.6355628967285	23.8338813781738	23.4354705810547	22.6772632598877	8	3	2	74.2	45.2	16.1	9.9486	0	17.896	156040000	7	7	A0A446JZ13;Q53WS2;P22701;M7YEH7;A0A446JYY8;A0A446JYY9;A0A3B5ZUU2;Q9ZR71	A0A446JZ13;Q53WS2;P22701;M7YEH7;A0A446JYY8;A0A446JYY9;A0A3B5ZUU2;Q9ZR71	475
22.7377033233643	23.7678165435791	23.5861930847168	22.8621768951416	22.5659084320068	23.3666229248047	22.5964260101318	23.0317363739014	23.8451080322266	2	2	2	20	20	20	13.632	0	11.814	323480000	7	2	Q41585;M8AJF7;A0A446KC48;A0A446KBY1;Q05806	Q41585;M8AJF7;A0A446KC48;A0A446KBY1;Q05806	479
22.4787464141846	23.6621208190918	24.0511436462402	23.4561786651611	23.3927764892578	23.3713035583496	27.4763011932373	27.3200168609619	27.920991897583	4	4	2	55	55	19.8	11.935	0	24.103	2647300000	7	18	J7K291;P01544;Q9T0P1;A0A446KCA8;Q9S6Y2;P01545;M0VC70;A0A287GM49	J7K291;P01544;Q9T0P1;A0A446KCA8;Q9S6Y2	480
31.5081939697266	30.8610496520996	31.6022243499756	32.9975891113281	32.0242919921875	32.798713684082	32.9175720214844	32.7657814025879	33.6744041442871	11	11	0	62.1	62.1	0	15.46	0	72.246	98984000000	7	143	P16851;A0A4P8DL25;A0A446Y6D3	P16851;A0A4P8DL25;A0A446Y6D3	539
23.8303165435791	22.9291648864746	23.2210159301758	23.321798324585	22.6262245178223	23.6836643218994	23.1097812652588	22.9191360473633	23.7798156738281	8	2	2	75.8	38.3	38.3	13.005	0	12.332	55188000	7	2	D2TGC2	D2TGC2	561
26.8973522186279	25.9999599456787	26.2768936157227	26.0810317993164	25.4428787231445	26.054573059082	23.3395881652832	23.2234916687012	21.2718658447266	7	2	0	39.2	19.4	0	22.739	0	13.837	649210000	7	27	Q6IVU6;F2E754;A0A287SJE7;A0A3B6MXQ7;A0A3B6MYR1;A1IVM0;Q6V7B1;A3RHJ5;A3RHH8;Q9ZTR3;T1TE89;A0A446THJ1;A0A067YHQ0;A0A067YHQ3;A0A3B6KRB2;A0A446THX0;A0A287SJ80;Q0H445;A0A067YI64;A0A067YHZ4;A0A067YHY8;A0A067YHX8;A0A067YHX7;A0A067YHQ4;M8AGP5	Q6IVU6	589
24.1428871154785	23.7207927703857	23.0668048858643	23.7598857879639	22.6083984375	23.7963695526123	23.0081634521484	24.0019645690918	23.0875072479248	1	1	1	8.5	8.5	8.5	10.265	0.0050761	6.3178	0	6	0	A0A287RKP0;A0A287M426;A0A446J5B1;A0A287M417;M7YGU5;A0A446Q4I3;A0A446NU89;A0A446K411;A0A077RWB9;A0A287SRM1;A0A287M423;A0A287G5M7;A0A287SRD3;A0A287SRK3;A0A446UTL1;F2D861;F2DHJ3;W5FV77;M7ZKS0;A0A287RK86;G8E2S8;H2L223;M7Z560	A0A287RKP0;A0A287M426;A0A446J5B1;A0A287M417;M7YGU5;A0A446Q4I3;A0A446NU89;A0A446K411;A0A077RWB9;A0A287SRM1;A0A287M423;A0A287G5M7;A0A287SRD3;A0A287SRK3;A0A446UTL1;F2D861;F2DHJ3;W5FV77;M7ZKS0;A0A287RK86;G8E2S8;H2L223;M7Z560	19
30.3540534973145	30.1688976287842	30.3968296051025	30.2799644470215	30.2233142852783	30.261812210083	29.6997356414795	29.7734794616699	30.2807388305664	7	7	0	39.4	39.4	0	39.879	0	66.788	24625000000	6	153	C3VN79;D5FPE6;R4JAN9;R4JB53;R4JDM5;F8SGL7;F8SGM8;X2JG17;B2Y2S2;B2Y2S1;A2IBJ9;D5FPE5;F8SGL8;B2Y2S6;F8SGL4;D5FPE4;D3U318;A2IBK1;R4JFP9;F8SGL9;C5IXL3;D3UAL6;A0A0S2GJT4;A0A0S2GJQ7;X2JC91;A2TN61;V6BPA5;A0A0S2GJR7;R4JFQ3;A8CA05;V9P785;R4JB62;F8SGM5;A0A2P1BXU9;F8SGL3;F8SGM9;F8SGM7;A0A2P1BXV0;O49958;Q68VI0;A0A0S2GJR1;F8SGL6;F8SGL5;B8Y0L5;Q41551;C8KIL6;F8SGL2;F8SGN0;Q5TLY9;Q5TLY8;A0A0S2GJR0;Q0ZCA8;C3VN78;…	C3VN79;D5FPE6;R4JAN9;R4JB53;R4JDM5;F8SGL7;F8SGM8;X2JG17;B2Y2S2;B2Y2S1;A2IBJ9;D5FPE5;F8SGL8;B2Y2S6;F8SGL4;D5FPE4;D3U318;A2IBK1;R4JFP9;F8SGL9;C5IXL3;D3UAL6;A0A0S2GJT4;A0A0S2GJQ7;X2JC91;A2TN61;V6BPA5;A0A0S2GJR7;R4JFQ3;A8CA05;V9P785;R4JB62;F8SGM5;A0A2P1BXU9;F8SGL3;F8SGM9;F8SGM7;A0A2P1BXV0;O49958;Q68VI0;A0A0S2GJR1;F8SGL6;F8SGL5;B8Y0L5;Q41551;C8KIL6;F8SGL2;F8SGN0;Q5TLY9;Q5TLY8;A0A0S2GJR0;Q0ZCA8;C3VN78;…	51
24.0004119873047	24.8125972747803	24.9550895690918	25.6045875549316	25.7102508544922	22.5874271392822	22.7092056274414	23.8726577758789	23.6752243041992	4	3	0	15.8	15.8	0	44.507	0	19.149	4067100000	6	43	A0A0S2GJQ9;Q8W3W9;R4JB52;R4JFA4;I1XB51;R4JAQ0;R4JB48;R4JDN1;A0A0S2GJS5;R4JBK6;A0A0S2GJR8;R4JDK6;R4JBF1;Q8W3X4;B2Y2R8;B2Y2R4;B2Y2R5;B2Y2R6;D5FPE2;B2Y2S0;D3U319;D5FPE1;Q75ZV9;Q8W3X0;R4JBG2;Q8W3W6;Q8GU18;B8XU58;R4JBJ2;B2Y2Q7;R4JB54;B2BZD0;C8AW50;A0A2U8JCZ2;B2Y2Q1;B2Y2Q4;B2Y2Q3;D6RVY4;B2Y2Q2;K0I5W1;B2Y2Q6;B2Y2S3;A0A7D4XNS9;I1XB56;Q9ZNY0;D3U328;Q0GNF9;Q5MFN4;Q5MFQ0;A0A7D5BVW2;Q6J160;D5FPE3;A0A2R4Q9U9;…	A0A0S2GJQ9;Q8W3W9;R4JB52;R4JFA4;I1XB51;R4JAQ0;R4JB48;R4JDN1;A0A0S2GJS5;R4JBK6;A0A0S2GJR8;R4JDK6;R4JBF1;Q8W3X4;B2Y2R8;B2Y2R4;B2Y2R5;B2Y2R6;D5FPE2;B2Y2S0;D3U319;D5FPE1;Q75ZV9;Q8W3X0;R4JBG2;Q8W3W6;Q8GU18;B8XU58;R4JBJ2;B2Y2Q7;R4JB54;B2BZD0;C8AW50;A0A2U8JCZ2;B2Y2Q1;B2Y2Q4;B2Y2Q3;D6RVY4;B2Y2Q2;K0I5W1;B2Y2Q6;B2Y2S3;A0A7D4XNS9;I1XB56;Q9ZNY0;D3U328;Q0GNF9;Q5MFN4;Q5MFQ0;A0A7D5BVW2;Q6J160;D5FPE3;A0A2R4Q9U9;…	52
23.4447746276855	23.323637008667	23.1955165863037	23.5837879180908	22.8157997131348	23.3569202423096	22.5087509155273	22.9071655273438	23.9426307678223	2	2	2	36.9	36.9	36.9	9.3585	0	11.844	99384000	6	8	F2DRT7;A0A287FFW7;M7Z8W1;F2DY13;A0A3B5ZTU8;A0A3B5Y043;A0A287FFY4;A0A446JVU9;A0A3B5YXN4;A0A287FFW8	F2DRT7;A0A287FFW7;M7Z8W1;F2DY13;A0A3B5ZTU8;A0A3B5Y043;A0A287FFY4;A0A446JVU9;A0A3B5YXN4;A0A287FFW8	103
23.186616897583	23.3961505889893	23.6430568695068	23.3077983856201	22.5177040100098	21.5479259490967	24.1600742340088	22.7768535614014	24.6382637023926	1	1	1	17.2	17.2	17.2	22.085	0	6.7156	10610000	6	2	A0A287QJ23;A0A446TXB0;A0A3B6MLS0;A0A446TXA9;A0A446SRL8;A0A446TXC0;A0A446SR84;A0A287QIS4;F2CSJ8;A0A446SRI3;A0A446TXA6;A0A446TXB9;A0A3B6KDD9;A0A446SRC8;A0A3B6MLW1;A0A3B6KE67;A0A446SRD8;A0A287QJH5;F2DIF8;A0A3B6MN60;A0A446TXB8;A0A287QIW0;A0A446SRB8;A0A287QJJ1;A0A287QIU1;A0A287QIV4;A0A287QIT3;A0A287QJK6;A0A287QIU6;A0A287QJ28;A0A287QJI6;A0A287QJ33;A0A287QJA9;A0A287QJ42;A0A287QIV1;A0A287QJ91;A0A3B6MM29;…	A0A287QJ23;A0A446TXB0;A0A3B6MLS0;A0A446TXA9;A0A446SRL8;A0A446TXC0;A0A446SR84;A0A287QIS4;F2CSJ8;A0A446SRI3;A0A446TXA6;A0A446TXB9;A0A3B6KDD9;A0A446SRC8;A0A3B6MLW1;A0A3B6KE67;A0A446SRD8;A0A287QJH5;F2DIF8;A0A3B6MN60;A0A446TXB8;A0A287QIW0;A0A446SRB8;A0A287QJJ1;A0A287QIU1;A0A287QIV4;A0A287QIT3;A0A287QJK6;A0A287QIU6;A0A287QJ28;A0A287QJI6;A0A287QJ33;A0A287QJA9;A0A287QJ42;A0A287QIV1;A0A287QJ91;A0A3B6MM29;…	145
23.4924564361572	23.8200511932373	22.9164848327637	23.0522918701172	22.4510593414307	23.8754043579102	24.4803695678711	23.1209335327148	23.2921714782715	1	1	1	29.2	29.2	29.2	9.5638	0	6.5858	15982000	6	4	Q7X9K0;A0A446SSB6;A0A446RZ47;A0A446R317;A0A287QLW2;A0A446SS76;A0A446RZL2;A0A446TY32;A0A446RZ66;W5ECL2;F2CT73;A0A446RZ11;A0A446R363;A0A287QLW4;M7Z578;A0A287QLG6	Q7X9K0;A0A446SSB6;A0A446RZ47;A0A446R317;A0A287QLW2;A0A446SS76;A0A446RZL2;A0A446TY32;A0A446RZ66;W5ECL2;F2CT73;A0A446RZ11;A0A446R363;A0A287QLW4;M7Z578;A0A287QLG6	146
24.2214221954346	23.9459934234619	22.7545146942139	23.1821441650391	24.1210556030273	22.1128349304199	22.5649471282959	23.8608531951904	23.6515617370605	1	1	1	8.7	8.7	8.7	18.825	0	6.506	0	6	0	A0A446U7A0;A0A3B6MZQ0;A0A446URI9;A0A446TJM5;A0A3B6KPK2;A0A3B6LV49;A0A446URJ3;A0A446TJB0;A0A287SMV4;A0A287SMX1	A0A446U7A0;A0A3B6MZQ0;A0A446URI9;A0A446TJM5;A0A3B6KPK2;A0A3B6LV49;A0A446URJ3;A0A446TJB0;A0A287SMV4;A0A287SMX1	154
22.1384391784668	23.9076824188232	23.263334274292	23.8668575286865	22.8925228118896	22.8488922119141	23.782096862793	23.4216442108154	23.1495685577393	1	1	1	12.2	12.2	12.2	13.204	0.0050847	6.3188	39371000	6	6	A0A446WCW2;A0A446VEM2;A0A287U5U2;A0A446VEN0;A0A446VEM4;A0A287U674;A0A287U5N0;A0A287U5X1;W5GVD2;M7Z2S6;A0A446VES2;A0A3B6PLL9;F2DD97;A0A287U5M5	A0A446WCW2;A0A446VEM2;A0A287U5U2;A0A446VEN0;A0A446VEM4;A0A287U674;A0A287U5N0;A0A287U5X1;W5GVD2;M7Z2S6;A0A446VES2;A0A3B6PLL9;F2DD97;A0A287U5M5	164
29.1471748352051	29.106294631958	29.2225093841553	29.3409595489502	29.6169128417969	29.7113037109375	28.0617790222168	27.6306209564209	27.9905891418457	8	8	7	45.3	45.3	45.3	22.549	0	54.446	8159800000	6	97	A0A446JGR8;A0A3B5YPZ7	A0A446JGR8;A0A3B5YPZ7	219
23.8149280548096	23.7622108459473	24.1747398376465	22.6774444580078	24.0926990509033	22.979642868042	23.4547863006592	22.5481395721436	23.2452526092529	5	5	4	59.6	59.6	50.9	18.845	0	31.529	0	6	1	A0A3B6I2R2;D2KFH1;A0A287F854;P0CZ09;M7ZT31;A0A3B6TIG9;A0A3Q9HIQ5	A0A3B6I2R2;D2KFH1	327
23.6024475097656	24.5784244537354	23.1775150299072	23.681526184082	22.9752826690674	23.0632266998291	23.0768756866455	24.1565361022949	22.9097232818604	4	3	3	38	27.2	27.2	9.8135	0	18.012	1101400000	6	11	M7ZVX7;A0A3B6J044;A0A3B6UA79	M7ZVX7;A0A3B6J044;A0A3B6UA79	350
23.8527011871338	22.758337020874	23.5219211578369	22.8179454803467	23.5116901397705	23.582914352417	23.2124843597412	21.8314666748047	22.7699031829834	3	2	2	28	16.8	16.8	15.989	0	17.623	3725000000	6	5	Q41540;A0A3B6JQP1	Q41540;A0A3B6JQP1	356
22.591028213501	26.4526824951172	23.5918407440186	22.3696746826172	22.6315937042236	22.1112422943115	26.3696956634521	26.5364856719971	26.9481544494629	5	5	3	66.9	66.9	44.9	12.534	0	31.534	1001500000	6	21	A0A446UD52;A0A3B6LNN9	A0A446UD52;A0A3B6LNN9	384
23.4413375854492	22.984842300415	24.0120811462402	26.045352935791	23.7561111450195	26.4412956237793	23.6297454833984	22.9442806243896	22.5585327148438	2	2	2	24.5	24.5	24.5	12.06	0	11.629	198800000	6	7	A0A3B6NII8	A0A3B6NII8	403
23.3599071502686	22.9894046783447	23.122974395752	24.0288047790527	23.4896831512451	24.0359802246094	23.7801666259766	22.9736366271973	23.4562091827393	2	2	2	49.6	49.6	49.6	14.178	0	13.336	123310000	6	7	A0A3B6R960;A0A446X1T7;D0PRB5;A0A287VP43;B6EF35;A0A3B6TKM4;M7YVS8;P49232;F2E5Q1;E2GJB9;P49234;A0A446Y1Q3;A0A446X1Q4;A0A1Y0AUB0;P49233;A0A287VP41;A0A446X1T1;A0A446Y1L0;A0A287VP69	A0A3B6R960;A0A446X1T7;D0PRB5;A0A287VP43;B6EF35;A0A3B6TKM4;M7YVS8;P49232;F2E5Q1;E2GJB9;P49234;A0A446Y1Q3;A0A446X1Q4;A0A1Y0AUB0;P49233;A0A287VP41;A0A446X1T1;A0A446Y1L0;A0A287VP69	429
22.9114933013916	23.0073356628418	23.5044441223145	23.1038703918457	22.5702476501465	22.0877513885498	22.6671009063721	23.0897903442383	22.5425624847412	4	4	4	45.9	45.9	45.9	13.206	0	23.715	176640000	6	5	A0A3B6REZ0;A0A446XDR1;A0A341YDG0;M7ZWD9;A0A446XDU4;A0A446YDB8;A0A287WJQ6	A0A3B6REZ0;A0A446XDR1;A0A341YDG0;M7ZWD9;A0A446XDU4;A0A446YDB8;A0A287WJQ6	433
24.1178340911865	23.4835948944092	23.0484485626221	23.1751804351807	23.5551948547363	23.4560203552246	23.284049987793	23.1770572662354	23.4715442657471	2	2	2	43.2	43.2	43.2	7.9488	0	12.322	17201000	6	0	A0A446XRS8;M7ZWX9;A0A446XRS3;A0A3B6TNZ4;A0A3B6RNX6;M0XHQ5;A0A446YR00;F2D2Y2;A0A446YR31;A0A3B6SHJ3;A0A287XH08	A0A446XRS8;M7ZWX9;A0A446XRS3;A0A3B6TNZ4;A0A3B6RNX6;M0XHQ5;A0A446YR00;F2D2Y2;A0A446YR31;A0A3B6SHJ3;A0A287XH08	443
22.882080078125	24.3042774200439	23.5383853912354	23.0980110168457	23.284912109375	22.8674640655518	22.779390335083	23.758617401123	23.1503429412842	1	1	1	16.8	16.8	16.8	12.944	0	7.5752	456660000	6	7	P83207;A0A3B6TIX0	P83207;A0A3B6TIX0	458
23.2203960418701	23.0408840179443	23.373046875	22.6661739349365	22.7921180725098	23.3308506011963	23.8686332702637	22.8161907196045	22.2949333190918	3	3	3	14.5	14.5	14.5	31.442	0	19.975	130370000	6	2	X2J8F3;Q5MFH2;Q9FEQ2;A0A446IHD9;A0A446IHF7;A0A446IHF3;Q5MFG8;A0A446IHF1;A0A446IHD8;Q84NE4;Q6SPY7;A0A446IHK8;A0A446IHE5;Q5MFH3;Q6QGW0;Q5MFH0;B3EY91;A0A446IHH2;A0A446IHE3;X2JBS9;Q19MN3;G9AYK6;R9XWF9;X2J8E3;R4JBI2;Q19N55;D3UAL5;R4JAR7;R9XUF2;I1XB50;P93794;O22116;R4JFL5;A0A446IHF5;D3U317;M7ZXM2;A0A1U9XL81;A0A0A0R1G0;A0A0A0QXD3;R9XUU0;A0A0A0R2J7;A0A0A0R2J3;Q2PQJ6;R4JB27;Q6SPY8;Q38L54;Q6SPZ0;D2DII3;A0A…	X2J8F3;Q5MFH2;Q9FEQ2;A0A446IHD9;A0A446IHF7;A0A446IHF3;Q5MFG8;A0A446IHF1;A0A446IHD8;Q84NE4;Q6SPY7;A0A446IHK8;A0A446IHE5;Q5MFH3;Q6QGW0;Q5MFH0;B3EY91;A0A446IHH2;A0A446IHE3;X2JBS9;Q19MN3;G9AYK6;R9XWF9;X2J8E3;R4JBI2;Q19N55;D3UAL5;R4JAR7;R9XUF2;I1XB50;P93794;O22116;R4JFL5;A0A446IHF5;D3U317;M7ZXM2;A0A1U9XL81;A0A0A0R1G0;A0A0A0QXD3;R9XUU0;A0A0A0R2J7;A0A0A0R2J3;Q2PQJ6;R4JB27;Q6SPY8;Q38L54;Q6SPZ0;D2DII3;A0A…	466
23.2809314727783	26.5560054779053	26.7380218505859	26.6233825683594	26.8385791778564	26.3137512207031	26.7190799713135	25.9464149475098	26.6447143554688	3	1	1	59.2	23.7	23.7	15.092	0.0017094	6.3725	1415200000	6	32	H9NAV6;A0A446LYA3	H9NAV6;A0A446LYA3	486
24.8983135223389	23.6436443328857	23.5915546417236	23.044116973877	22.6761722564697	23.1313667297363	23.1067676544189	23.2221355438232	22.8858070373535	5	3	3	72.9	50.8	50.8	12.513	0	18.544	345860000	6	12	A0A446T615;M7ZFM9;A0A3B6MUN9;A0A3B6KHL6	A0A446T615;M7ZFM9	514
23.5746841430664	23.3238887786865	23.6287136077881	22.8136806488037	23.400821685791	22.8280372619629	25.1628856658936	24.8342685699463	25.8457984924316	6	4	2	71.3	65.3	32	15.238	0	29.886	393350000	6	22	A0A446UPU1	A0A446UPU1	522
22.7861995697021	22.9071865081787	22.0783710479736	22.8041591644287	23.7428302764893	22.8911190032959	23.5063762664795	22.7082614898682	23.5400886535645	2	1	1	16.2	5.7	5.7	30.291	0.0083893	6.2232	0	6	0	C7FB14;C7FB16;A0A287EFF5;I6SJ26;Q0PIV6;I6SW30;I6TRT5;I6TMW4;A0A287EF93;A0A287EFC4;A0A287EF74;C7FB17;C7FB13;Q2XQF1;C7FB15;A0A287EF96;A0A287EFB7;I6TEV5	C7FB14;C7FB16;A0A287EFF5;I6SJ26;Q0PIV6;I6SW30;I6TRT5;I6TMW4;A0A287EF93;A0A287EFC4;A0A287EF74;C7FB17;C7FB13;Q2XQF1;C7FB15;A0A287EF96;A0A287EFB7;I6TEV5	557
23.9949417114258	22.9011707305908	24.4051246643066	22.969388961792	22.4857521057129	23.6397018432617	26.1124324798584	26.5087547302246	23.3627185821533	5	5	5	37.9	37.9	37.9	11.367	0	29.239	811770000	6	17	M8AA65;M7YIZ5;T1NAL0;A0A287G553;A0A287F0Y3;A0A446MLS8;A0A446NUB9;M8A7C5;A0A287TR56;A0A287GFE9;A0A287GEQ6;A0A287J3E0;A0A287G4N4;A0A287S4U6;A0A287G560;A0A287XKV0;A0A287GNU5;A0A287M501;A0A287RY47;A0A287GNT1;A0A446W0Z3;A0A287G547;A0A287GNX5;A0A287G5W2;A0A287TB36;A0A287W955;A0A287GP19;A0A287TBB5;A0A287TAM5;A0A287S4M2;A0A287ES82;A0A287S4J4;A0A287S4M7;A0A287S4M8;A0A287GNX8;A0A446K996;A0A287IZC1;M8A5F2;A…	M8AA65	574
27.8040904998779	23.2816410064697	28.0010986328125	23.1399116516113	22.949031829834	27.9946403503418	23.1364402770996	23.0039405822754	23.4770851135254	6	6	3	92.5	92.5	59.7	7.046	0	39.089	6685200000	6	33	P82901;Q2PCC7	P82901;Q2PCC7	578
23.6069507598877	22.124303817749	22.9223747253418	24.4449043273926	23.6167049407959	23.3249797821045	23.7725086212158	23.0291748046875	22.9657382965088	2	2	1	10	10	5	33.762	0	12.085	1544600000	6	10	Q670S1	Q670S1	588
23.5903244018555	23.1640224456787	23.5365314483643	22.4378128051758	22.6082344055176	22.5656147003174	23.46164894104	24.1654415130615	24.0102519989014	2	2	2	32.1	32.1	32.1	8.9399	0	12.703	74728000	5	8	A0A0C4BJ86;W5EL62;M7YVI1;A0A3B6FEG0;A0A3B6BY95;F2E931;F2CS23;A0A3B6ISR9;A0A446KN01;A0A7H4LCS1	A0A0C4BJ86;W5EL62;M7YVI1;A0A3B6FEG0;A0A3B6BY95;F2E931;F2CS23;A0A3B6ISR9;A0A446KN01;A0A7H4LCS1	35
24.0951976776123	22.879430770874	23.2295475006104	23.0804805755615	22.9972801208496	21.9588661193848	23.001220703125	22.9172210693359	23.252103805542	1	1	1	18.4	18.4	18.4	7.4445	0	7.3174	0	5	4	A0A446N3Z8;A0A3B6GQH9;A0A3B6EEC2;Q8GTC9;M8A724;I6NQG8;F2CX69;A0A287K5T6	A0A446N3Z8;A0A3B6GQH9;A0A3B6EEC2;Q8GTC9;M8A724;I6NQG8;F2CX69;A0A287K5T6	124
23.6413745880127	24.1152114868164	23.9352970123291	24.1872310638428	23.4062843322754	22.7883815765381	23.2198963165283	22.3149166107178	22.0688610076904	2	2	2	29.7	29.7	29.7	8.5075	0	12.164	23757000	5	0	A0A287W604;A0A446WLG4;A0A287US61;A0A3B6TNY0;F2DKD7;A0A3B6RHJ4;A0A446WLI5;A0A287US34;M7ZYJ6;A0A3B6PS83;A0A3B6QLA7;A0A446WLI7;A0A287USJ1;A0A446WLH0;A0A3B6NUN7;A0A446WLI2;A0A446VNR2;A0A287W6W0;A0A287W607;D4P3E7;A0A446WLK3;M7YTA3;A0A287W601;A0A287W676;A0A287W666;A0A287W672;A0A287W677;A0A287W603;A0A287W671;A0A446VNX0;A0A287W602;A0A446WLI6;A0A3B6RE24;A0A446X8I7;A0A446Y8D6	A0A287W604;A0A446WLG4;A0A287US61;A0A3B6TNY0;F2DKD7;A0A3B6RHJ4;A0A446WLI5;A0A287US34;M7ZYJ6;A0A3B6PS83;A0A3B6QLA7;A0A446WLI7;A0A287USJ1;A0A446WLH0;A0A3B6NUN7;A0A446WLI2;A0A446VNR2;A0A287W6W0;A0A287W607;D4P3E7;A0A446WLK3;M7YTA3;A0A287W601;A0A287W676;A0A287W666;A0A287W672;A0A287W677;A0A287W603;A0A287W671;A0A446VNX0;A0A287W602;A0A446WLI6;A0A3B6RE24;A0A446X8I7;A0A446Y8D6	168
25.6329517364502	25.5454540252686	25.553092956543	23.2297172546387	26.2453594207764	26.259220123291	23.1443672180176	23.3575382232666	23.6438961029053	7	6	1	37.5	37.5	14	22.215	0	49.467	949420000	5	27	M8ANS4;A0A3B5XTA4	M8ANS4;A0A3B5XTA4	191
22.6537818908691	23.8363933563232	22.5331420898438	23.0700626373291	24.1326866149902	22.9336757659912	23.4802341461182	22.4765911102295	24.2951736450195	4	4	4	52.7	52.7	52.7	11.363	0	23.805	733250000	5	18	A0A3B5ZWM4;A0A3B5YZL3;M8A407;A0A446K2Y5;A0A446J463;A0A3B5Y2A7;Q7XYD5;P05390	A0A3B5ZWM4;A0A3B5YZL3;M8A407;A0A446K2Y5;A0A446J463;A0A3B5Y2A7;Q7XYD5	206
23.5361423492432	24.459400177002	23.7357501983643	23.2791213989258	22.6658802032471	24.1003818511963	24.2746257781982	23.0031414031982	23.1901264190674	1	1	1	21.9	21.9	21.9	6.2333	0	7.2936	0	5	5	M8A9X3;A0A3B5ZPR7;A0A3B5YQW7	M8A9X3;A0A3B5ZPR7;A0A3B5YQW7	221
23.5158214569092	23.472484588623	23.8348751068115	23.0024604797363	23.6596527099609	22.4271564483643	22.8385448455811	23.1105365753174	23.0808277130127	2	2	2	32.7	32.7	32.7	5.7003	0	12.137	417070000	5	11	P84964;M0WF10;A0A3B5ZMC6;A0A446YKS4;A0A3B6SN90;M0WF11;F2CTD8;A0A3B5ZP16	P84964;M0WF10;A0A3B5ZMC6;A0A446YKS4;A0A3B6SN90;M0WF11;F2CTD8;A0A3B5ZP16	240
28.126522064209	28.0581188201904	28.882999420166	28.313024520874	28.2756862640381	28.7463436126709	28.7287769317627	28.7848472595215	28.4626770019531	4	4	2	59.8	59.8	19.5	8.3758	0	24.617	6966000000	5	67	M7ZCN8;A0A446NJB8;A0A3B6EKM3;E6Y2L2	M7ZCN8;A0A446NJB8;A0A3B6EKM3;E6Y2L2	289
23.4696006774902	24.3868827819824	23.6550521850586	23.3200263977051	23.2908935546875	22.5987529754639	24.0324420928955	23.1590232849121	23.0179100036621	4	4	4	51	51	51	22.252	0	25.05	351280000	5	0	A0A446IHD6;A0A446IHC7;A0A446IHB5;A0A446IHC0;A0A446IHA8;A0A446IHB3;Q94G97;B6UKS0;D0ES81;Q94G96;M9TG60;M7ZAE1;A0A3B5XT99;R9XWC4	A0A446IHD6;A0A446IHC7;A0A446IHB5;A0A446IHC0;A0A446IHA8;A0A446IHB3;Q94G97;B6UKS0;D0ES81;Q94G96;M9TG60;M7ZAE1;A0A3B5XT99	464
23.8965950012207	23.3167419433594	23.0588836669922	23.7118988037109	23.2569847106934	22.8387203216553	23.1571426391602	23.1573314666748	23.5760612487793	2	2	2	21.2	21.2	21.2	34.342	0	12.377	177320000	5	3	A0A446JG43;B6UKJ9;A0A446JGQ8;A0A446JGF8;R9XV62;A0A446JG98;A0A446JGA9;B6UKK3;B6UKK9;B6UKK6;B6UKK1;B6UKK0;B6UKJ8;M9TK56;A0A2U8JD23	A0A446JG43;B6UKJ9;A0A446JGQ8;A0A446JGF8;R9XV62;A0A446JG98;A0A446JGA9;B6UKK3;B6UKK9;B6UKK6;B6UKK1;B6UKK0;B6UKJ8;M9TK56;A0A2U8JD23	472
23.4980506896973	23.2054119110107	24.0657405853271	24.2376270294189	23.9727840423584	23.3881988525391	22.8390140533447	22.3643016815186	22.8100395202637	1	1	1	18.4	18.4	18.4	8.6979	0	6.3911	21637000	5	5	W5CXF2;M8A4Z6;F2E8H3;A0A446NDI1	W5CXF2;M8A4Z6;F2E8H3;A0A446NDI1	491
27.3005981445313	22.4319515228271	27.0021724700928	26.9912910461426	22.8206367492676	27.0918426513672	22.4323673248291	23.1810150146484	23.0429077148438	4	2	2	72	26.8	26.8	8.4039	0	12.005	1120600000	5	19	W5D637;A0A446PU33;A0A3B6GXD3;F2CT65	W5D637;A0A446PU33;A0A3B6GXD3;F2CT65	496
22.9602794647217	23.7401466369629	22.9656181335449	23.3721771240234	24.1308784484863	23.0553207397461	22.3854808807373	23.094425201416	23.2365455627441	4	4	4	41.7	41.7	41.7	10.315	0	23.587	130670000	5	0	M4VP35;A0A446UT41	M4VP35;A0A446UT41	524
22.99977684021	23.4716758728027	22.634672164917	23.0751533508301	22.4535179138184	23.7616405487061	24.0313148498535	22.9540023803711	22.6109828948975	2	2	2	46.2	46.2	46.2	9.0685	0	11.592	291260000	5	4	M8A8T7;A0A446XRT4;A0A3B6SK85;A0A3B6TW80	M8A8T7;A0A446XRT4;A0A3B6SK85;A0A3B6TW80	537
23.309986114502	23.0538444519043	23.865909576416	22.245735168457	23.4333972930908	23.5066204071045	22.5992603302002	22.6171531677246	22.9849014282227	4	2	0	42.9	14.2	0	34.292	0	12.576	13597000	5	0	A0A7D5BLI2;H9XH00;A0A7D5BHS3;H6VLP8;Q0QBR5;D2K763;A0A7D4XM26;A0A068F8M7;A0A7D4XLZ4;I3XHQ2;A0A0S2GKA3;K7XRG7;F8SGM2;A0A7D4XY91;A0A7D5BHT4;F8SGM3;A0A7D5BLN1;A0A7D5C1I4;P93792;Q5MFP3;Q0PW09;R9XWG5;Q8W3V5;Q52NZ2;Q5MFP1;P04729;D7RFI3;A0A7D4XMD4;F4YT76;D3U323;A0A7D4XSC7;Q5MFP0;Q52NZ6;V9P6P2;X2JC78;D0PX24;Q41547;R9YQY5;V9P6Q3;K7XED9;V9P7D6;R4JB49;F4YT77;V9P754;R4JAT4;I3QPG6;A0A7D5C1J7;K7WV92;A0A7D5BXB5;…	A0A7D5BLI2;H9XH00;A0A7D5BHS3;H6VLP8;Q0QBR5;D2K763;A0A7D4XM26;A0A068F8M7;A0A7D4XLZ4;I3XHQ2;A0A0S2GKA3;K7XRG7;F8SGM2;A0A7D4XY91;A0A7D5BHT4;F8SGM3;A0A7D5BLN1;A0A7D5C1I4;P93792;Q5MFP3;Q0PW09;R9XWG5;Q8W3V5;Q52NZ2;Q5MFP1;P04729;D7RFI3;A0A7D4XMD4;F4YT76;D3U323;A0A7D4XSC7;Q5MFP0;Q52NZ6;V9P6P2;X2JC78;D0PX24;Q41547;R9YQY5;V9P6Q3;K7XED9;V9P7D6;R4JB49;F4YT77;V9P754;R4JAT4;I3QPG6;A0A7D5C1J7	543
26.583194732666	26.4432735443115	25.7191314697266	25.7522830963135	26.2959136962891	25.7333221435547	22.7286167144775	26.3859424591064	26.4533729553223	3	3	3	50	50	50	11.192	0	17.811	946350000	5	25	M7YAR9;Q5I7K5;M0XWV5	M7YAR9;Q5I7K5;M0XWV5	570
23.68678855896	22.4343109130859	22.9825534820557	23.5277004241943	23.2729244232178	23.7813625335693	21.899829864502	22.8769836425781	23.2691612243652	3	3	2	17.7	17.7	17.7	30.82	0	18.428	1014800000	4	5	Q4G3S3;Q1LZV2;A0A0K2GRS0;Q4G3S5;I6R4A7;P06470;A0A287EFE1;A0A287EFD4;A0A0K2GRS6;A0A0K2GRU1;Q40021;A0A287EFF7;Q40022;A0A0K1Z5E8;Q40020;A0A287EFH8;A0A287EFG2;Q4G3T9;A0A0K2GRQ1;Q4G3S1;Q4G3T0;A0A287EFB4;Q4G3S7;Q4G3S8;Q4G3S6	Q4G3S3;Q1LZV2;A0A0K2GRS0;Q4G3S5;I6R4A7;P06470;A0A287EFE1;A0A287EFD4;A0A0K2GRS6;A0A0K2GRU1;Q40021;A0A287EFF7;Q40022;A0A0K1Z5E8;Q40020;A0A287EFH8	46
23.6880359649658	24.6290321350098	22.7472610473633	24.0884056091309	23.4026470184326	23.6881103515625	23.2135391235352	23.8617210388184	24.4439792633057	2	2	1	21.7	21.7	6.8	25.414	0	12.554	57700000	4	3	R4JFK3;A0A1U9XLA1;A0A446IHK2;A0A7D4XNV2;R4JB46;A0A446IHH8;A7X9X7;A0A446IHQ7;A0A1B1RV25;Q9FEQ1;D3U315;D2DII5;B8XU60;Q8W3V9;Q8W3V8;Q8W3V7;Q41603;R4JDK8;Q8H0J4;Q8W3V6;B8XU59;V9P766	R4JFK3;A0A1U9XLA1;A0A446IHK2;A0A7D4XNV2;R4JB46;A0A446IHH8;A7X9X7;A0A446IHQ7;A0A1B1RV25;Q9FEQ1;D3U315;D2DII5;B8XU60;Q8W3V9;Q8W3V8;Q8W3V7;Q41603;R4JDK8;Q8H0J4;Q8W3V6;B8XU59;V9P766	57
22.6908054351807	22.968225479126	26.612455368042	26.812744140625	27.7318210601807	27.2148418426514	26.8463726043701	26.3318672180176	26.9834842681885	4	4	4	32.3	32.3	32.3	9.9825	0	23.641	1096000000	4	28	A0A1D5ZVN9;A0A3B6KSN2	A0A1D5ZVN9;A0A3B6KSN2	80
23.9072132110596	24.4071350097656	24.0509071350098	21.9018898010254	23.349609375	21.9603672027588	23.9195995330811	23.1373882293701	22.8565998077393	1	1	1	27.7	27.7	27.7	5.3968	0	7.0952	12923000	4	7	A0A287US18;A0A446WLG5;A0A3B6QL85;A0A3B6PS16;M0YZ23	A0A287US18;A0A446WLG5;A0A3B6QL85;A0A3B6PS16;M0YZ23	167
24.9969120025635	23.0271511077881	23.0597743988037	24.7816181182861	24.8424453735352	23.6233444213867	23.8455657958984	23.7574462890625	21.7381057739258	4	3	0	34.7	25.9	0	18.663	0	18.486	425090000	4	10	A0A3Q9HID3;A0A446WXT3;P0CZ08;A0A3S9SG69;A0A3S9SG42;A0A3Q9HJG2;A0A3Q9HJ17;A0A3Q9HIQ0;A0A3Q9HIC9;A0A3Q9HIC6;A0A3B6R7A6;P0CZ07;M7ZUH8;A0A446WXT5;P0CZ11	A0A3Q9HID3;A0A446WXT3;P0CZ08;A0A3S9SG69;A0A3S9SG42;A0A3Q9HJG2;A0A3Q9HJ17;A0A3Q9HIQ0;A0A3Q9HIC9;A0A3Q9HIC6;A0A3B6R7A6;P0CZ07;M7ZUH8;A0A446WXT5;P0CZ11	426
24.204740524292	23.4826183319092	22.9758377075195	23.1861362457275	22.7857227325439	22.86106300354	22.918478012085	24.0733871459961	22.7553405761719	4	1	1	34.1	8.7	8.7	18.932	0	6.9406	0	4	0	A0A446WXT0;A0A446WXS8;A0A446WXR7;A0A3Q9HIC7	A0A446WXT0;A0A446WXS8;A0A446WXR7;A0A3Q9HIC7	463
23.0729827880859	25.7772350311279	23.3663673400879	26.1528854370117	23.5250072479248	23.0718402862549	23.2530784606934	22.4839363098145	22.8853950500488	3	3	3	31.6	31.6	31.6	32.995	0	17.884	366680000	4	18	A0A446JG55;Q6EEW4;M9TE83;A0A446JG99;A0A446JG88;A0A446JG83;P06659;Q6EEW6;B6UKP2;A0A290XYZ0;B6UKM0;B6UKQ4;A0A290XZ35;B6UKL3;B6UKK2;F2X0K8;A0A290XZ13;B6UKM3;A0A290XZ10;Q6EEW3;B9VRH9;A0A290XZ06;Q6EEX1;A0A290XZ45;A0A290XYV2;A0A290XYY3;A0A290XYY4;B6UKQ2;A0A446JG85;B6UKM7;A0A446JG74;Q6EEW5;A0A290XZ47;B6UKN4;F2X322;A0A290XZ25;A0A446JGE5	A0A446JG55;Q6EEW4;M9TE83;A0A446JG99;A0A446JG88;A0A446JG83;P06659;Q6EEW6;B6UKP2;A0A290XYZ0;B6UKM0;B6UKQ4;A0A290XZ35;B6UKL3;B6UKK2;F2X0K8;A0A290XZ13;B6UKM3;A0A290XZ10;Q6EEW3;B9VRH9;A0A290XZ06;Q6EEX1;A0A290XZ45;A0A290XYV2;A0A290XYY3;A0A290XYY4;B6UKQ2	473
27.2219562530518	26.9720230102539	27.0953693389893	27.3258590698242	27.4869251251221	27.2531356811523	26.7983531951904	26.1215705871582	26.3550453186035	4	4	2	74.8	74.8	39.1	15.434	0	26.872	4063800000	4	151	A0A446KN56;A0A446KN50;A0A3B6ASV9;C3VQ50;A0A3B6ASA5;A0A287HAQ9;F2DHH7;A0A142I888;A0A446LYA8;A0A446KN60;A0A287RL12;A0A287HAY1;A0A287HAT7;A0A287HAY6	A0A446KN56;A0A446KN50;A0A3B6ASV9;C3VQ50;A0A3B6ASA5;A0A287HAQ9;F2DHH7;A0A142I888	482
23.5772953033447	24.0117416381836	23.6438007354736	22.6918926239014	21.8704662322998	24.1356430053711	23.0656490325928	23.2072086334229	23.1223659515381	2	2	2	73.3	73.3	73.3	4.9897	0	11.835	97715000	4	0	P84971;A0A3B6RC59;W5HIB6;M7Z3C5	P84971;A0A3B6RC59;W5HIB6;M7Z3C5	579
23.7415008544922	25.0587882995605	23.2164421081543	23.6496677398682	25.8053569793701	23.9128112792969	24.2880401611328	23.7789974212646	22.8181705474854	1	1	1	23.1	23.1	23.1	21.254	0	7.1839	339320000	3	14	A0A455QTE1;A0A0K2QJA2;X2KVH9;A0A0K2QJF4;A0A0E3Z6W2;A0A0E3UQX9;B8XU30;A0A0E3Z6W6;A0A0E3Z5F3;A0A0E3UR90;A0A0K2QJC3;A0A0E3UQV3;A0A0E3UQX3;A0A0K2QJY1	A0A455QTE1;A0A0K2QJA2;X2KVH9;A0A0K2QJF4;A0A0E3Z6W2;A0A0E3UQX9;B8XU30;A0A0E3Z6W6;A0A0E3Z5F3;A0A0E3UR90;A0A0K2QJC3;A0A0E3UQV3;A0A0E3UQX3;A0A0K2QJY1	37
23.2301063537598	23.730899810791	24.6566619873047	23.6079368591309	23.5337429046631	23.9953384399414	21.9370231628418	22.4915332794189	22.3193111419678	1	1	1	28.1	28.1	28.1	6.1231	0	6.5091	10462000	3	2	A0A287TRC3;W5B2G7;M7YZ47;A0A446YQA9;A0A446T8U2;A0A3B6FGQ1;A0A446PFH9;A0A446V9P9;A0A3B6NN41;A0A446T8V8;A0A446YQ99;A0A446YW31;A0A446W7V8;A0A3B6BWJ3;A0A446YWH6;M7YIQ3;A0A446PE33;A0A446W7W0;A0A446YWE5;F2D4G9;M7Y9U8;A0A1D6AYG3;A0A446T8U9;A0A446PDX7;A0A3B6AR24;A0A3B5Z5H1;A0A3B5Y4F7;A0A1D6CUU0;A0A446V9L3;A0A446V9L0	A0A287TRC3;W5B2G7;M7YZ47;A0A446YQA9;A0A446T8U2;A0A3B6FGQ1;A0A446PFH9;A0A446V9P9;A0A3B6NN41;A0A446T8V8;A0A446YQ99;A0A446YW31;A0A446W7V8;A0A3B6BWJ3;A0A446YWH6;M7YIQ3;A0A446PE33;A0A446W7W0;A0A446YWE5;F2D4G9;M7Y9U8;A0A1D6AYG3;A0A446T8U9;A0A446PDX7;A0A3B6AR24;A0A3B5Z5H1;A0A3B5Y4F7;A0A1D6CUU0;A0A446V9L3;A0A446V9L0	81
24.8777370452881	23.9241046905518	25.154411315918	25.1835155487061	25.2190036773682	24.906005859375	23.0764007568359	24.257926940918	23.0560569763184	2	2	1	29.9	29.9	13.9	33.748	0	14.182	304900000	3	19	A0A1P8DTA3;A0A455QSW4;R9XV51;A0A1K0J4W8;K7XEA2;K7XRA8;A0A0E3Z6R7;A0A023WGG0;A0A0E3UQY1;R9XV26;A0A0E3Z568;K7XRB5;A0A0K2QJ98;D0UTY2;A0A0E3UR70;A0A1P8DT78;A0A1P8DSZ8;A0A0E3URC2;K7WV53;A0A1P8DSK6;K7X1F5;A0A0E3Z5D9;A0A0E3Z623;K7XRC1;A0A1P8DS69;J7HT14;K7X1K5;H6VLP5;A0A1P8DTA5;A0A1P8DTC6;K7XE59;A0A2P1H695;A0A1K0JSA4;K7XRC7;A0A1P8DS80;A0A1P8DSY6;A0A1K0IT13;A0A1K0JNG6;A0A0K2QJJ9;A5JSA6;A0A0E3URB5;R9XW94;A…	A0A1P8DTA3;A0A455QSW4;R9XV51;A0A1K0J4W8;K7XEA2;K7XRA8;A0A0E3Z6R7;A0A023WGG0;A0A0E3UQY1;R9XV26;A0A0E3Z568;K7XRB5;A0A0K2QJ98;D0UTY2;A0A0E3UR70;A0A1P8DT78;A0A1P8DSZ8;A0A0E3URC2;K7WV53;A0A1P8DSK6;K7X1F5;A0A0E3Z5D9;A0A0E3Z623;K7XRC1;A0A1P8DS69;J7HT14;K7X1K5;H6VLP5;A0A1P8DTA5;A0A1P8DTC6;K7XE59;A0A2P1H695;A0A1K0JSA4;K7XRC7;A0A1P8DS80;A0A1P8DSY6;A0A1K0IT13;A0A1K0JNG6;A0A0K2QJJ9;A5JSA6;A0A0E3URB5;R9XW94;A…	90
23.8137283325195	22.8134822845459	23.4092807769775	23.3604259490967	22.9908885955811	22.3406505584717	23.518367767334	22.8405780792236	22.6999092102051	2	1	1	38.4	20.9	20.9	9.565	0	27.032	0	3	0	A0A287JK80;F2EGD5;M0VH55	A0A287JK80;F2EGD5;M0VH55	121
30.5437927246094	29.7926254272461	30.34255027771	29.9643039703369	30.1486778259277	29.8808708190918	28.8136615753174	28.7705211639404	28.6913242340088	2	2	2	15.8	15.8	15.8	40.924	0	15.498	15706000000	3	85	A0A446W0B5;A0A446W0E8;A0A3B6PHC0;A0A446W0F7;A0A2R2Y425;A0A446W0I4;A0A446W0B7;A0A446W0C2;I0IT60;I0IT56;I0IT59;A0A4Y5USJ8;A0A446W0N0;A0A446W0D7;F6M8E8;A0A3B6UCY7;I0IT57;A0A1P8DSP4;I0IT54;D2T2K3;I0IT58;A0A455QRL2;A0A455QV13;A0A455QRH6;A0A3B6UD25;A0A446W0D4	A0A446W0B5;A0A446W0E8;A0A3B6PHC0;A0A446W0F7;A0A2R2Y425;A0A446W0I4;A0A446W0B7;A0A446W0C2;I0IT60;I0IT56;I0IT59;A0A4Y5USJ8;A0A446W0N0;A0A446W0D7;F6M8E8;A0A3B6UCY7;I0IT57;A0A1P8DSP4;I0IT54;D2T2K3;I0IT58;A0A455QRL2;A0A455QV13;A0A455QRH6;A0A3B6UD25;A0A446W0D4	185
23.8384056091309	23.3537864685059	23.8054962158203	23.0077934265137	23.884521484375	22.9757270812988	23.7938499450684	23.942211151123	23.0576858520508	3	2	1	18.8	18.8	18.8	19.798	0	13.448	0	3	0	P0CZ10;A0A3Q9HJH3;A0A3Q9HID8;A0A3B6I494	P0CZ10;A0A3Q9HJH3;A0A3Q9HID8;A0A3B6I494	329
24.1156196594238	23.3575420379639	23.4957866668701	22.5380115509033	23.2836132049561	23.0417003631592	23.0560836791992	23.2704391479492	21.6368446350098	2	2	2	18.1	18.1	18.1	25.665	0	11.656	559240000	3	3	A0A455QSD3;I0IT55;A0A446W0C9;A0A3B6U775;A0A455QSV6;I0IT53	A0A455QSD3;I0IT55;A0A446W0C9;A0A3B6U775;A0A455QSV6;I0IT53	531
28.5606708526611	28.1233196258545	28.8338832855225	28.2456760406494	28.5728607177734	28.2730655670166	28.7472400665283	28.3532962799072	28.3791484832764	3	2	2	29.5	13.6	13.6	34.763	0	15.598	4388600000	3	34	D2X6D5;A0A0K2QJU3;A0A1K0J4V2;A0A4Y5USJ7;A0A2R2Y404;A0A446W0B2;A0A1K0ISY6;A0A1K0IT85;A0A1K0JNE4;A0A1K0K0Q0;A0A1K0ISZ7;A0A1K0ITF9;I0IT62;A0A0K0VHI4;A0A446W0C7;B5U2V9;A0A1P8DSN6;A0A1P8DSZ1;A0A1P8DSP5;A0A446W0D8;A0A455QQ33;A0A446W089;A0A1K0JS88;A0A4Y5USH4	D2X6D5;A0A0K2QJU3;A0A1K0J4V2;A0A4Y5USJ7;A0A2R2Y404;A0A446W0B2;A0A1K0ISY6;A0A1K0IT85;A0A1K0JNE4;A0A1K0K0Q0;A0A1K0ISZ7;A0A1K0ITF9;I0IT62;A0A0K0VHI4;A0A446W0C7;B5U2V9;A0A1P8DSN6;A0A1P8DSZ1;A0A1P8DSP5;A0A446W0D8;A0A455QQ33;A0A446W089	562
23.3018074035645	22.8411140441895	23.4690608978271	24.0520153045654	23.7448177337646	23.5547122955322	23.0178909301758	23.6143798828125	23.4508056640625	2	2	2	72.3	72.3	72.3	5.2391	0	11.973	53075000	3	1	P20158;W5FHQ6	P20158;W5FHQ6	577
23.2479400634766	24.3521595001221	22.5961818695068	22.7803401947021	24.0139503479004	24.3488445281982	23.455924987793	23.0483264923096	22.7911853790283	1	1	1	11.2	11.2	11.2	31.858	0	6.7044	43497000	2	1	A0A3B5XTS9	A0A3B5XTS9	192
23.0830459594727	24.110559463501	24.0500030517578	23.9284763336182	23.4523868560791	23.083610534668	22.9096393585205	22.3038368225098	23.6331329345703	4	3	3	34.1	25.4	25.4	18.917	0	20.737	71199000	2	4	A0A446WXV0;A0A3S9SGB0;A0A3Q9HIS2;A0A3Q9HIE4;A0A3B6RB11;A0A3Q9HIM3;A0A446WXR1;A0A3Q9HIE2	A0A446WXV0;A0A3S9SGB0;A0A3Q9HIS2;A0A3Q9HIE4;A0A3B6RB11;A0A3Q9HIM3;A0A446WXR1;A0A3Q9HIE2	430
24.6616249084473	23.3424205780029	23.4929084777832	23.086217880249	22.8835201263428	24.0426540374756	23.7809753417969	23.5581893920898	23.2941818237305	2	1	1	29.3	13.7	13.7	34.517	0	6.8755	254120000	2	11	X2KS61;F6M8F3;A0A1P8DSR5;A0A1P8DTB3;A0A0E3UQX1;J7HZV9;J7HZV4;P04722;K7XRA1;J7HSR5;A5JSB5;A0A1P8DTD4;A0A1P8DT51;A0A1P8DSY4;R9XW91;A0A1P8DSR9;A0A1P8DSM7;H6VLP6;A0A1P8DST2;A0A0E3Z6M2;A0A1P8DS60;A0A1K0ITA3;A0A1K0IT12;A0A1P8DSS8;A0A1P8DT34;A0A1P8DSL9;A0A1P8DSI6;A5JSA8;A0A1P8DSQ5;Q9M4M4;A0A1P8DT48;A0A455QTH1;R9XSU5	X2KS61;F6M8F3;A0A1P8DSR5;A0A1P8DTB3;A0A0E3UQX1;J7HZV9;J7HZV4;P04722;K7XRA1;J7HSR5;A5JSB5;A0A1P8DTD4;A0A1P8DT51;A0A1P8DSY4;R9XW91;A0A1P8DSR9;A0A1P8DSM7;H6VLP6;A0A1P8DST2;A0A0E3Z6M2;A0A1P8DS60;A0A1K0ITA3;A0A1K0IT12;A0A1P8DSS8;A0A1P8DT34;A0A1P8DSL9;A0A1P8DSI6;A5JSA8;A0A1P8DSQ5;Q9M4M4;A0A1P8DT48;A0A455QTH1;R9XSU5	604
24.0016136169434	22.7092266082764	26.8587532043457	22.504997253418	26.5082874298096	27.1972312927246	23.7653789520264	22.6651821136475	22.7268505096436	2	2	2	27.1	27.1	27.1	25.832	0	13.837	845750000	1	15	A0A455QTG1;A0A0K2QJD8;A0A0K2QJY6;A0A0K2QJ82;A0A0E3Z630;F6M8F2	A0A455QTG1;A0A0K2QJD8;A0A0K2QJY6;A0A0K2QJ82;A0A0E3Z630;F6M8F2	38
23.791166305542	23.4610767364502	21.8456325531006	23.1715965270996	21.6410427093506	23.7424373626709	23.8797721862793	22.5406532287598	24.2292156219482	1	1	1	19.2	19.2	19.2	20.778	0	7.5887	794470000	1	22	A0A455QRK2;A0A455QQ25;A0A455QSU7;I0IT51;A0A2R2Y424;A0A1P8DT43;A0A0K2QJC8;B8XU28;B8XU26;B8XU27;B8XU29;A0A0K2QJ85;I0IT52	A0A455QRK2;A0A455QQ25;A0A455QSU7;I0IT51;A0A2R2Y424;A0A1P8DT43;A0A0K2QJC8;B8XU28;B8XU26;B8XU27;B8XU29;A0A0K2QJ85;I0IT52	47
22.6362686157227	23.358865737915	22.8928070068359	23.4700565338135	23.3580074310303	23.4874897003174	23.7772312164307	23.3786506652832	23.4051856994629	3	2	1	69.2	47	21.1	21.537	0	19.874	0	1	0	A0A455QSC4;D2X6D7;A0A1P8DS96;A5JSA9;A0A1P8DS92;D2X6D9;A0A2R2Y441;D2X6D1;A0A1P8DS38;A0A0E3UQV9;A0A0E3Z6R2;A0A0E3Z7N1;F4YT74;R9XU90;A5JTR5;A0A1P8DSJ5;A0A0E3Z5E3;Q2V5Z7;A0A1P8DSJ7;A0A1P8DTE7;A0A1P8DS55;A0A0E3Z7J9;A0A446W0C8;A0A1P8DSG3;A0A0K2QJC7;A0A0K2QJ88;A0A0E3Z552;I6V8J5;A0A0E3UR92;P04727;A5JSA4;Q41529;A0A455QRI7;A0A1P8DSG0;Q41546;A0A446W0B9;X2KWE1;A0A446W0A6;A0A446W095;A0A446W0A1;A0A446W0E7;A0A4…	A0A455QSC4;D2X6D7;A0A1P8DS96;A5JSA9;A0A1P8DS92;D2X6D9;A0A2R2Y441;D2X6D1;A0A1P8DS38;A0A0E3UQV9;A0A0E3Z6R2;A0A0E3Z7N1;F4YT74;R9XU90;A5JTR5;A0A1P8DSJ5;A0A0E3Z5E3;Q2V5Z7;A0A1P8DSJ7;A0A1P8DTE7;A0A1P8DS55;A0A0E3Z7J9	88
27.0077419281006	27.0168018341064	27.7749862670898	27.2270164489746	27.0254878997803	28.0690727233887	22.7609195709229	23.2869071960449	24.7675952911377	2	1	1	29.7	13.7	13.7	34.469	0	11.932	1230500000	1	28	A0A1P8DSW3;K7XE82;A0A1P8DSB7;A0A0E3Z6T2;A0A1P8DSK1;X2L2H1;A0A1P8DSV9;A0A1P8DTB0;R9XSX0;P04723;K7XR94;K7X0S2;I0IT65;A0A1P8DSZ3;A0A1P8DSZ0;A0A1P8DSC6;A0A1P8DSX4;A0A1P8DT45;Q308Q7;A0A0E3UR64;A0A1P8DTC2;A0A0E3UR77;A0A1P8DS53;A0A1P8DT57;A0A0E3UQU0;A0A1P8DST8;A0A1P8DSN7;A0A455QSE2;A0A1P8DSL6;A0A1P8DS66;A0A1P8DSM4;Q9M4M6;Q9M4M3;A0A1P8DSP1;A0A1P8DT62;A0A1P8DSG5;A0A1P8DSY2;A0A1P8DTB9;A0A1P8DSH3;A0A1P8DSF5…	A0A1P8DSW3;K7XE82;A0A1P8DSB7;A0A0E3Z6T2;A0A1P8DSK1;X2L2H1;A0A1P8DSV9;A0A1P8DTB0;R9XSX0;P04723;K7XR94;K7X0S2;I0IT65;A0A1P8DSZ3;A0A1P8DSZ0;A0A1P8DSC6;A0A1P8DSX4;A0A1P8DT45;Q308Q7;A0A0E3UR64;A0A1P8DTC2;A0A0E3UR77;A0A1P8DS53;A0A1P8DT57;A0A0E3UQU0;A0A1P8DST8;A0A1P8DSN7;A0A455QSE2;A0A1P8DSL6;A0A1P8DS66;A0A1P8DSM4;Q9M4M6;Q9M4M3;A0A1P8DSP1;A0A1P8DT62;A0A1P8DSG5;A0A1P8DSY2;A0A1P8DTB9;A0A1P8DSH3;A0A1P8DSF5…	89
28.6454010009766	29.5458183288574	28.7925319671631	29.2556819915771	29.7229595184326	29.353422164917	28.7999591827393	28.8088531494141	28.8876838684082	3	3	1	41.3	41.3	12.6	35.687	0	33.952	10718000000	1	148	A0A446W0A9;A0A446W096;A0A446W094;A0A446W0J7;A0A446W093	A0A446W0A9;A0A446W096;A0A446W094;A0A446W0J7;A0A446W093	529
24.1103000640869	23.0521030426025	23.6332931518555	22.9364376068115	22.4969730377197	22.8041687011719	23.5474395751953	23.674337387085	22.331033706665	3	1	0	40.1	12.2	0	36.812	0	11.109	0	1	0	A0A446W0A5;A0A446W085;A0A446W0F5;A0A446W0G6;A0A446W0L8	A0A446W0A5;A0A446W085;A0A446W0F5;A0A446W0G6	530
